# Supplementary material for: Comparative efficacy of serotonin (5-HT3) receptor antagonists in patients undergoing surgery: a systematic review and network meta-analysis
Source: PubMed Central journal article supplement (PMC4472258; doi:10.1186/s12916-015-0371-y), 2015-06-18
Supplement: 12916_2015_371_MOESM1_ESM.pdf [file 12916_2015_371_MOESM1_ESM.pdf]

## APPENDICES

|                                                                                                                                       |     |
|---------------------------------------------------------------------------------------------------------------------------------------|-----|
| Appendix 1. Inclusion criteria for interventions and comparator groups .....                                                          | 2   |
| Appendix 2. Included Studies with References for each analysis and sub-group analysis                                                 | 3   |
| Appendix 3. List of excluded studies from previous systematic reviews.....                                                            | 24  |
| Appendix 4. Study characteristics.....                                                                                                | 36  |
| Appendix 5. Frequencies for specific drugs and drug combinations.....                                                                 | 55  |
| Appendix 6. Patient characteristics.....                                                                                              | 56  |
| Appendix 7. Cochrane EPOC Risk-of-bias appraisal results.....                                                                         | 70  |
| Appendix 8. Aggregate EPOC risk-of-bias appraisal results.....                                                                        | 78  |
| Appendix 9. Newcastle-Ottawa Scale appraisal results.....                                                                             | 79  |
| Appendix 10. Comparison adjusted funnel plots.....                                                                                    | 80  |
| Appendix 11: Network meta-analysis results for patients of all ages and children only for all time periods.....                       | 81  |
| Appendix 12. Plot of the surface under the cumulative ranking (SUCRA) curves for the 15 treatments included in Vomiting.....          | 90  |
| Appendix 13. Network plots using colored edges according to the levels of the treatment effect modifier age of participants* .....    | 91  |
| Appendix 14. Network plots using colored edges according to the levels of the treatment effect modifier timing of administration..... | 92  |
| Appendix 15. Vomiting sub-group analysis results.....                                                                                 | 93  |
| Appendix 16. Nausea network meta-analysis results forest plot versus placebo .....                                                    | 99  |
| Appendix 17. Plot of the surface under the cumulative ranking (SUCRA) curves for the 15 treatments included in Nausea. ....           | 100 |
| Appendix 18. Nausea sub-group analysis results .....                                                                                  | 101 |
| Appendix 19. PONV network meta-analysis results forest plot versus placebo .....                                                      | 107 |
| Appendix 20. Plot of the surface under the cumulative ranking (SUCRA) curves for the 13 treatments included in PONV. ....             | 108 |
| Appendix 21. PONV sub-group analysis results .....                                                                                    | 109 |
| Appendix 22. Included studies in our review versus previous systematic reviews .....                                                  | 114 |

**Appendix 1. Inclusion criteria for interventions and comparator groups**

|                                                                                                                                                |                      |                                                                                                             |                       |                         |                |                 |              |  |
|------------------------------------------------------------------------------------------------------------------------------------------------|----------------------|-------------------------------------------------------------------------------------------------------------|-----------------------|-------------------------|----------------|-----------------|--------------|--|
| <b><i>Intervention:</i></b>                                                                                                                    |                      | <b><i>Eligible comparators:</i></b>                                                                         |                       |                         |                |                 |              |  |
| 5-HT3 receptor antagonist with or without dexamethasone<br>(Ondansetron, Granisetron, Dolasetron, Tropisetron, Ramosetron, Palonosetron)       |                      | I. Different 5-HT3 antagonist with or without Dexamethasone                                                 |                       |                         |                |                 |              |  |
|                                                                                                                                                |                      | II. Antiemetic comparator listed below with or without Dexamethasone                                        |                       |                         |                |                 |              |  |
|                                                                                                                                                |                      | III. Same 5-HT3 antagonist given at different dose, formula, and/or timing or same 5-HT3 with Dexamethasone |                       |                         |                |                 |              |  |
|                                                                                                                                                |                      | IV. Same 5-HT3 antagonist given in combination with one of the comparators below                            |                       |                         |                |                 |              |  |
|                                                                                                                                                |                      | V. Different 5-HT3 antagonist given in combination with one of the comparators below                        |                       |                         |                |                 |              |  |
| <b><i>Antiemetic comparators included:</i></b>                                                                                                 |                      |                                                                                                             |                       |                         |                |                 |              |  |
| <b>Benzamides</b>                                                                                                                              | <b>Phenothiazine</b> | <b>Butyrophenones</b>                                                                                       | <b>Antihistamines</b> | <b>Anticholinergics</b> | <b>NK-1</b>    | <b>Steroids</b> | <b>NaSSA</b> |  |
| Metoclopramide                                                                                                                                 | Perphenazine         | Haloperidol                                                                                                 | Dimenhydrinate        | Scopolamine             | Aprepitant     | Dexamethasone   | Mirtazapine  |  |
| Azasetron                                                                                                                                      | Prochlorperazine     | Droperidol                                                                                                  | Cyclizine             |                         | Casopitant     |                 |              |  |
| Alizapride                                                                                                                                     | Promethazine         |                                                                                                             |                       |                         | Rolapitant     |                 |              |  |
|                                                                                                                                                |                      |                                                                                                             |                       |                         | CP-122,<br>721 |                 |              |  |
| <b>Abbreviations:</b> 5-HT3, Serotonin; NK-, Neurokinin-1 receptor antagonists; NaSSA, Noradrenergic and specific serotonergic antidepressant. |                      |                                                                                                             |                       |                         |                |                 |              |  |

## Appendix 2. Included Studies with References for each analysis and sub-group analysis

### Literature Search

450 potentially relevant full-text articles (444 primary publications [1-439][440-447] and 6 companion reports (reporting on nine studies) [235, 443, 444, 448-450].

### Vomiting Analyses

1. Network meta-analysis for vomiting included 238 RCTs, with a total of 12, 781 patients [1-6, 9, 12, 13, 15-18, 21, 24, 25, 27, 29, 30, 32, 34-36, 40, 42-44, 48, 53-56, 58, 59, 61, 64, 67, 68, 70, 71, 73, 74, 79-82, 84-86, 99, 100, 102, 103, 105, 107-109, 111, 112, 115-118, 123, 124, 127, 128, 130, 132, 134, 136-139, 143, 144, 149, 150, 152-154, 156-159, 163, 165, 167, 169, 174, 176, 181, 182, 188-193, 195, 196, 200, 201, 203, 210, 211, 213-218, 220, 221, 223, 224, 227-230, 233-238, 240, 241, 244, 245, 248-253, 255, 256, 258-260, 263-266, 269-272, 275-278, 285-287, 290-292, 295, 296, 298, 299, 302, 304-310, 316, 324-326, 329, 330, 332, 333, 338-341, 343, 344, 347, 348, 351, 353, 356, 358, 361-365, 367, 371-373, 377-380, 382, 384, 386, 387, 389, 390, 392, 397, 402, 404-406, 408, 411, 412, 414-417, 419, 420, 422-424, 426, 428-430, 433, 434, 438, 451-453].
2. Subgroup analysis included 220 RCTs involving 10,811 patients in which the agents were administered during surgery [1-6, 12, 13, 16-18, 21, 24, 25, 27, 29, 30, 32, 34-36, 40, 42-44, 48, 53-56, 58, 59, 61, 64, 68, 71, 73, 79-81, 84-86, 99, 102, 103, 105, 107-109, 111, 112, 115-118, 123, 124, 128, 130, 132, 134, 136-139, 143, 144, 149, 150, 153, 154, 156-158, 163, 165, 167, 174, 176, 182, 188-193, 195, 196, 200, 201, 203, 210, 211, 213-218, 221, 223, 224, 227-230, 233-235, 237, 238, 240, 241, 244, 245, 248-251, 253, 255, 256, 258-260, 263-266, 269-272, 275-278, 285-287, 290, 291, 295, 296, 298, 299, 302, 304-309, 316, 324, 326, 329-333, 338-341, 343, 344, 347, 348, 351, 353, 356, 358, 361-365, 367, 371-373, 377-380, 382, 384, 386, 387, 389, 390, 392, 397, 402, 404-406, 411, 412, 414-420, 422-424, 426, 428-430, 433, 434, 438, 451] .
3. Subgroup analysis included 46 RCTs involving a total of 1830 children [13, 29, 32, 48, 58, 59, 64, 80, 84-86, 123, 138, 139, 153, 174, 176, 191, 213, 214, 224, 249, 252, 253, 258, 285, 306, 309, 310, 324, 333, 339, 340, 348, 351, 353, 358, 361, 363, 378, 392, 397, 419, 429, 434]

### Nausea Analyses

1. Network meta-analysis for nausea included 195 RCTs with a total of 24,230 patients [1-6, 8, 9, 11, 12, 15-18, 21, 24, 25, 27, 30, 34-36, 40, 44, 53-56, 61, 67, 68, 70, 71, 73, 80, 82, 93, 99-103, 105, 107-109, 111, 112, 115-118, 127, 130-132, 134, 136, 137, 143, 144, 149, 156-159, 163, 165, 167-169, 172, 173, 176, 178, 180-182, 188, 189, 192, 193, 195, 196, 198, 200, 201, 203, 210, 211, 215-217, 220, 221, 227-229, 236-238, 240, 241, 243, 245, 248-252, 255, 259, 260, 264-266, 270-272, 275-278, 284, 287-290, 292, 295, 296, 298, 299, 302, 304-308, 316, 318, 321, 324, 326, 328-330, 334, 338, 339, 341, 343, 347, 356, 360-362, 364, 365, 367, 372, 373, 377, 379, 380, 382-384, 386, 387, 389, 390, 402, 404-406, 408, 412, 414-418, 420, 422-424, 426, 428, 430-432, 451].
2. Subgroup analysis included 175 RCTs involving 21844 patients in which the agents were administered during surgery) [1-6, 11, 12, 15-18, 21, 24, 25, 27, 30, 34-36, 40, 44, 53-56, 61, 68, 71, 73, 80, 99, 102, 103, 105, 107-109, 111, 112, 115-118, 130-132, 134, 136, 137, 143, 144, 149, 156-158, 163, 165, 167, 172, 173, 176, 178, 180, 182, 188, 189, 192, 193, 195, 196, 198, 200, 201, 203, 210, 211, 215-217, 221, 227-229, 236, 238, 240, 241, 244, 245, 248-251, 255, 259, 260, 264-266, 270-272, 275-278, 284, 287-290, 295, 296, 298, 299, 302, 304-308, 316, 318, 321, 324, 326, 328-330, 334, 338, 339, 341, 343,

347, 356, 360, 362, 364, 365, 367, 372, 373, 377, 379, 380, 382-384, 386, 387, 389, 390, 402, 404-406, 412, 414-417, 420, 422-424, 426, 428, 430-432, 451].

3. Subgroup analysis included 11 RCTs involving a total of 1326 children [80, 176, 178, 249, 306, 324, 334, 339, 360].

### PONV Analyses

1. Network meta-analysis for vomiting included 125 RCTs, with a total of 16,667 patients [3-6, 8, 9, 11, 12, 16-18, 23, 32, 33, 37, 40, 41, 44, 60, 67, 68, 71, 99-103, 109-112, 115-117, 127, 130, 132, 134, 136, 137, 139, 143, 144, 158-160, 162, 163, 165, 172, 173, 175, 176, 178-180, 182, 187-189, 192, 197, 198, 209, 211, 215, 217, 227, 228, 230, 234, 245, 250, 252, 254-256, 259, 271, 272, 275, 276, 279, 287, 290, 291, 295, 296, 298, 299, 305, 313, 317-320, 328, 334, 336, 337, 339, 343, 360-362, 367, 369, 370, 375, 379, 383, 385, 388, 390, 406, 409, 410, 412, 418, 423, 428, 430-432]
2. Subgroup analysis included 116 RCTs involving 12,415 patients in which the agents were administered during surgery) [3-6, 9, 11, 12, 15-18, 23, 32, 33, 37, 40, 41, 43, 44, 60, 68, 71, 99, 102, 103, 109-112, 115-117, 130, 132, 134, 136, 137, 139, 143, 144, 158, 160, 162, 163, 165, 172, 173, 175-177, 179, 180, 182, 187-189, 192, 197, 198, 211, 215, 217, 227, 228, 230, 234, 245, 250, 254-256, 259, 271, 272, 275, 276, 279, 287, 290, 291, 295, 296, 298, 299, 305, 313, 316, 318-320, 328, 334, 336, 337, 339, 343, 360, 362, 367, 369, 370, 375, 379, 383, 385, 388, 390, 406, 409, 410, 412, 423, 428, 430-432].
3. Subgroup analysis included 14 RCTs involving a total of 2394 children [12, 109, 110, 117, 245, 252, 259, 305, 320, 360, 361, 390, 406, 409].

### **References**

1. Abouleish EI, Rashid S, Haque S, Giezentanner A, Joynton P, Chuang AZ. Ondansetron versus placebo for the control of nausea and vomiting during Caesarean section under spinal anaesthesia. *Anaesthesia*. 1999; 54(5):479-482.
2. Abreu MPd, Vieira JL, Silva IFd, Miziara LEFG, Fófano R. Eficácia do ondansetron, metoclopramida, droperidol e dexametasona na prevenção de náusea e vômito após laparoscopia ginecológica em regime ambulatorial. Estudo comparativo. *Rev Bras Anesthesiol*. 2006; 56:08-15.
3. Adducci E, Gorgoglione M, Aceto P, Congedo E, Clemente A, Gualtieri E *et al*. The prophylaxis of postoperative nausea and vomiting after laparoscopic cholecystectomy. *Acta Medica Romana*. 2002; 40(4):331-339.
4. Agarwal A, Bose N, Gaur A, Singh U, Gupta MK, Singh D. Acupressure and ondansetron for postoperative nausea and vomiting after laparoscopic cholecystectomy. *Can J Anaesth*. 2002; 49(6):554-560.
5. Aghadavoudi OA, E. Comparison of granisetron, metoclopramide and gastric decompression for prevention of postoperative nausea and vomiting after fast track cardiac anesthesia. *Journal of Research in Medical Sciences*. 2008; 13(4):166-174.
6. Ahmed AB, Hobbs GJ, Curran JP. Randomized, placebo-controlled trial of combination antiemetic prophylaxis for day-case gynaecological laparoscopic surgery. *Br J Anaesth*. 2000; 85(5):678-682.
7. Ahmed Omran HAS, Abdelhamid Mohamed Nasr D, ezzat ali eid H. Effect of premedication with mirtazapine versus ondansetron on postoperative nausea and vomiting in breast surgery. *Egyptian Journal of Anaesthesia*. 2011; 27(3):135-139.
8. Alexander R, Fennelly M. Comparison of ondansetron, metoclopramide and placebo as premedicants to reduce nausea and vomiting after major surgery. *Anaesthesia*. 1997; 52(7):695-698.
9. Alexander R, Lovell AT, Seingry D, Jones RM. Comparison of ondansetron and droperidol in reducing postoperative nausea and vomiting associated with patient-controlled analgesia. *Anaesthesia*. 1995; 50(12):1086-1088.
10. Aleyasin A, Hanaf S, Saffarieh E, Torkamandi H, Allahyari S, Sadeghi F *et al*. Efficacy of generic granisetron vs Kytril for PONV in major gynecological operations: A randomized, double-blind clinical trial. *Iranian Journal of Pharmaceutical Research*. 2012; 11(4):1059-1064.

11. Alghanem SM, Massad IM, Rashed EM, Abu-Ali HM, Daradkeh SS. Optimization of anesthesia antiemetic measures versus combination therapy using dexamethasone or ondansetron for the prevention of postoperative nausea and vomiting. *Surg Endosc.* 2010; 24(2):353-358.
12. Alkaissi A, Gunnarsson H, Johnsson V, Evertsson K, Ofenbartl L, Kalman S. Disturbing post-operative symptoms are not reduced by prophylactic antiemetic treatment in patients at high risk of post-operative nausea and vomiting. *Acta Anaesthesiol Scand.* 2004; 48(6):761-771.
13. Allen D, Jorgensen C, Sims C. Effect of tropisetron on vomiting during patient-controlled analgesia in children. *Br J Anaesth.* 1999; 83(4):608-610.
14. Alon E, Himmelseher S. Ondansetron in the treatment of postoperative vomiting: a randomized, double-blind comparison with droperidol and metoclopramide. *Anesth Analg.* 1992; 75(4):561-565.
15. Alon E, Kocian R, Nett PC, Koechli OR, Baettig U, Grimaudo V. Tropisetron for the prevention of postoperative nausea and vomiting in women undergoing gynecologic surgery. *Anesth Analg.* 1996; 82(2):338-341.
16. Ansari MM, Siddiqui OA, Haleem S, Varshney R, Akhtar S, Khan FA. Comparison of ramosetron and ondansetron for control of post-operative nausea and vomiting following laparoscopic cholecystectomy. *Indian J Med Sci.* 2010; 64(6):272-280.
17. Aouad MT, Siddik-Sayyid SM, Taha SK, Azar MS, Nasr VG, Hakki MA *et al.* Haloperidol vs. ondansetron for the prevention of postoperative nausea and vomiting following gynaecological surgery. *Eur J Anaesthesiol.* 2007; 24(2):171-178.
18. Apfel CC, Korttila K, Abdalla M, Kerger H, Turan A, Vedder I *et al.* A factorial trial of six interventions for the prevention of postoperative nausea and vomiting. *N Engl J Med.* 2004; 350(24):2441-2451.
19. Arcioni R, della Rocca M, Romano S, Romano R, Pietropaoli P, Gasparetto A. Ondansetron inhibits the analgesic effects of tramadol: a possible 5-HT(3) spinal receptor involvement in acute pain in humans. *Anesth Analg.* 2002; 94(6):1553-1557, table of contents.
20. Argiriadou H, Papaziogas B, Pavlidis T, Parlapani A, Georgiou M, Papagiannopoulou P *et al.* Tropisetron vs ondansetron for prevention of postoperative nausea and vomiting after laparoscopic cholecystectomy: a randomized double-blind, placebo-controlled study. *Surg Endosc.* 2002; 16(7):1087-1090.
21. Ascaso FJ, Ayala I, Carbonell P, Castro FJ, Palomar A. Prophylactic intravenous ondansetron in patients undergoing cataract extraction under general anesthesia. *Ophthalmologica.* 1997; 211(5):292-295.
22. Bach-Styles T, Martin-Sheridan D, Hughes C, Kaufman S. Comparison of ondansetron, metoclopramide, and placebo in the prevention of postoperative emesis in children undergoing ophthalmic surgery. *CRNA.* 1997; 8(4):152-156.
23. Bacic A, Rumboldt Z, Gluncic I, Buklijas J. The impact of the menstrual cycle and ondansetron on postoperative nausea and vomiting. *Int J Clin Pharmacol Res.* 1998; 18(4):153-158.
24. Bajwa SS, Bajwa SK, Kaur J, Sharma V, Singh A, Singh A *et al.* Palonosetron: A novel approach to control postoperative nausea and vomiting in day care surgery. *Saudi J Anaesth.* 2011; 5(1):19-24.
25. Balki M, Kasodekar S, Dhumne S, Carvalho JC. Prophylactic [corrected] granisetron does not prevent postdelivery nausea and vomiting during elective cesarean delivery under spinal anesthesia. *Anesth Analg.* 2007; 104(3):679-683.
26. Bano F, Zafar S, Aftab S, Haider S. Dexamethasone plus ondansetron for prevention of postoperative nausea and vomiting in patients undergoing laparoscopic cholecystectomy: a comparison with dexamethasone alone. *J Coll Physicians Surg Pak.* 2008; 18(5):265-269.
27. Barbone G, Galizia M, Dambruoso P, Fiore T. Ondansetron vs Dolasetron in the prophylaxis of post-operative nausea and vomiting (PONV) following remifentanyl infusion. *Acta Anaesthesiologica Italica.* 2004; 55(2):132-142.
28. Barbosa MV, Nahas FX, Ferreira LM, Farah AB, Bariani RL, Joao BB. Ondansetron for the prevention of postoperative nausea and vomiting: which is the best dosage for aesthetic plastic surgery? *Aesthetic Plast Surg.* 2004; 28(1):33-36.
29. Barst SM, Leiderman JU, Markowitz A, Rosen AM, Abramson AL, Bienkowski RS. Ondansetron with propofol reduces the incidence of emesis in children following tonsillectomy. *Can J Anaesth.* 1999; 46(4):359-362.
30. Basu A, Saha D, Hembrom BP, Roy A, Naaz A. Comparison of palonosetron, granisetron and ondansetron as anti-emetics for prevention of postoperative nausea and vomiting in patients undergoing middle ear surgery. *J Indian Med Assoc.* 2011; 109(5):327-329.
31. Bestas A, Önal SA, Bayar MK, Yildirim A, Aygen E. Effects of Ondansetron and Granisetron on Postoperative Nausea and Vomiting in Adult Patients Undergoing Laparoscopic Cholecystectomy: A Randomized, Double-Blind, Placebo-Controlled Clinical Trial. *Curr Ther Res Clin Exp.* 2007; 68(5):303-312.
32. Bhardwaj N, Bala I, Kaur C, Chari P. Comparison of ondansetron with ondansetron plus dexamethasone for antiemetic prophylaxis in children undergoing strabismus surgery. *J Pediatr Ophthalmol Strabismus.* 2004; 41(2):100-104.

33. Bharti N, Shende D. Comparison of anti-emetic effects of ondansetron and low-dose droperidol in pediatric strabismus surgery. *J Pediatr Ophthalmol Strabismus*. 2003; 40(1):23-26.
34. Bhatia N, Katyal S, Grewal A, Kaul T. Antiemetic prophylaxis with granisetron, ondansetron and metoclopramide in ambulatory gynaecological laparoscopic surgery: A comparison. *Journal of Anaesthesiology Clinical Pharmacology*. 2008; 24(3):303-306.
35. Bhatnagar S, Gupta D, Mishra S, Srikanti M, Singh M, Arora R. Preemptive antiemesis in patients undergoing modified radical mastectomy: oral granisetron versus oral ondansetron in a double-blind, randomized, controlled study. *J Clin Anesth*. 2007; 19(7):512-516.
36. Bhattacharjee DP, Dawn S, Nayak S, Roy PR, Acharya A, Dey R. A comparative study between palonosetron and granisetron to prevent postoperative nausea and vomiting after laparoscopic cholecystectomy. *J Anaesthesiol Clin Pharmacol*. 2010; 26(4):480-483.
37. Bhattarai B, Shrestha S, Singh J. Comparison of ondansetron and combination of ondansetron and dexamethasone as a prophylaxis for postoperative nausea and vomiting in adults undergoing elective laparoscopic surgery. *J Emerg Trauma Shock*. 2011; 4(2):168-172.
38. Bicer C, Aksu R, Ulgey A, Madenoglu H, Dogan H, Yildiz K *et al*. Different doses of palonosetron for the prevention of postoperative nausea and vomiting in children undergoing strabismus surgery. *Drugs R D*. 2011; 11(1):29-36.
39. Biedler A, Wermelt J, Kunitz O, Muller A, Wilhelm W, Dethling J *et al*. A risk adapted approach reduces the overall institutional incidence of postoperative nausea and vomiting. *Can J Anaesth*. 2004; 51(1):13-19.
40. Bilgin TE, Birbicer H, Ozer Z, Doruk N, Tok E, Oral U. A comparative study of the antiemetic efficacy of dexamethasone, ondansetron, and metoclopramide in patients undergoing gynecological surgery. *Med Sci Monit*. 2010; 16(7):CR336-341.
41. Binstock W, Rubin R, Bachman C, Kahana M, McDade W, Lynch JP. The effect of premedication with OTFC, with or without ondansetron, on postoperative agitation, and nausea and vomiting in pediatric ambulatory patients. *Paediatr Anaesth*. 2004; 14(9):759-767.
42. Birmingham SD, Mecklenburg BW, Lujan E, Dacanay RG, Boyle PK, Green R. Dolasetron versus ondansetron as single-agent prophylaxis for patients at increased risk for postoperative nausea and vomiting: a prospective, double-blind, randomized trial. *Mil Med*. 2006; 171(9):913-916.
43. Biswas BN, Rudra A. Comparison of granisetron and granisetron plus dexamethasone for the prevention of postoperative nausea and vomiting after laparoscopic cholecystectomy. *Acta Anaesthesiol Scand*. 2003; 47(1):79-83.
44. Biswas BN, Rudra A, Mandal SK. Comparison of ondansetron, dexamethasone, ondansetron plus dexamethasone and placebo in the prevention of nausea and vomiting after laparoscopic tubal ligation. *J Indian Med Assoc*. 2003; 101(11):638, 640, 642.
45. Bodner M, White PF. Antiemetic efficacy of ondansetron after outpatient laparoscopy. *Anesth Analg*. 1991; 73(3):250-254.
46. Bolton CM, Myles PS, Carlin JB, Nolan T. Randomized, double-blind study comparing the efficacy of moderate-dose metoclopramide and ondansetron for the prophylactic control of postoperative vomiting in children after tonsillectomy. *Br J Anaesth*. 2007; 99(5):699-703.
47. Boonmak P, Boonmak S, Bunsangjaroen P, Srichaipanha S, Poomsawat S, Nonlhaopol D. Antiemetic effect of ondansetron 0.2 mg mL<sup>-1</sup> in PCA morphine solution. *Eur J Anaesthesiol*. 2007; 24(8):664-667.
48. Bowhay AR, May HA, Rudnicka AR, Booker PD. A randomized controlled trial of the antiemetic effect of three doses of ondansetron after strabismus surgery in children. *Paediatr Anaesth*. 2001; 11(2):215-221.
49. Bridges JD, Nettle CB, Dugirrala VJ, Suda KJ, Garey KW. Low-dose granisetron for the prevention of postoperative nausea and vomiting. *6*. 2006; 3(223-229).
50. Broome IJ, Robb HM, Raj N, Girgis Y, Wardall GJ. The use of tramadol following day--case oral surgery. *Anaesthesia*. 1999; 54(3):289-292.
51. Browning BA, Fort CA, Kemp KD, Shimata MF, Strube MD. Ondansetron versus dolasetron: a comparison study in the prevention of postoperative nausea and vomiting in patients undergoing gynecological procedures. *AANA J*. 2004; 72(2):129-132.
52. Browning RM, Fellingham WH, O'Loughlin EJ, Brown NA, Paech MJ. Prophylactic ondansetron does not prevent shivering or decrease shivering severity during cesarean delivery under combined spinal epidural anesthesia: a randomized trial. *Reg Anesth Pain Med*. 2013; 38(1):39-43.
53. Buggedo G, Gonzalez J, Asenjo C, De la Cuadra JC, Gajardo A, Castillo L *et al*. Ondansetron and droperidol in the prevention of postoperative nausea and vomiting. *Br J Anaesth*. 1999; 83(5):813-814.
54. Burmeister MA, Standl TG, Wintruff M, Brauer P, Blanc I, Schulte am Esch J. Dolasetron prophylaxis reduces nausea and postanaesthesia recovery time after remifentanyl infusion during monitored anaesthesia care for extracorporeal shock wave lithotripsy. *Br J Anaesth*. 2003; 90(2):194-198.
55. Campbell C, Miller DD. Failure of ondansetron to control postoperative nausea and vomiting in ambulatory surgical patients. *Am J Anesthesiol*. 1995; 22(2):81-86.

56. Candiotti KA, Kovac AL, Melson TI, Clerici G, Joo Gan T, Palonosetron 04-06 Study G. A randomized, double-blind study to evaluate the efficacy and safety of three different doses of palonosetron versus placebo for preventing postoperative nausea and vomiting. *Anesth Analg.* 2008; 107(2):445-451.
57. Candiotti KA, Nhuch F, Kamat A, Deepika K, Arheart KL, Birnbach DJ *et al.* Granisetron versus ondansetron treatment for breakthrough postoperative nausea and vomiting after prophylactic ondansetron failure: a pilot study. *Anesth Analg.* 2007; 104(6):1370-1373, table of contents.
58. Carnahan D, Dato K, Hartsuff J. The safety and efficacy of granisetron in postoperative vomiting in pediatric patients undergoing tonsillectomy. *AANA J.* 1997; 65(2):154-159.
59. Celiker V, Celebi N, Canbay O, Basgul E, Aypar U. Minimum effective dose of dexamethasone after tonsillectomy. *Paediatr Anaesth.* 2004; 14(8):666-669.
60. Chan MT, Choi KC, Gin T, Chui PT, Short TG, Yuen PM *et al.* The additive interactions between ondansetron and droperidol for preventing postoperative nausea and vomiting. *Anesth Analg.* 2006; 103(5):1155-1162.
61. Charuluxananan S, Kyokong O, Somboonviboon W, Narasethakamol A, Promlok P. Nalbuphine versus ondansetron for prevention of intrathecal morphine-induced pruritus after cesarean delivery. *Anesth Analg.* 2003; 96(6):1789-1793.
62. Charuluxananan S, Somboonviboon W, Kyokong O, Nimcharoendee K. Ondansetron for treatment of intrathecal morphine-induced pruritus after cesarean delivery. *Reg Anesth Pain Med.* 2000; 25(5):535-539.
63. Chen JJ, Frame DG, White TJ. Efficacy of ondansetron and prochlorperazine for the prevention of postoperative nausea and vomiting after total hip replacement or total knee replacement procedures: a randomized, double-blind, comparative trial. *Arch Intern Med.* 1998; 158(19):2124-2128.
64. Chen LK, Fan SZ, Huang CH, Chao A, Cherng YG, Chen CL *et al.* Effects of ondansetron on postoperative emesis in Chinese children. *Acta Anaesthesiol Sin.* 1998; 36(2):87-91.
65. Chen PP, Chui PT, Gin T. Comparison of ondansetron and metoclopramide for the prevention of postoperative nausea and vomiting after major gynaecological surgery. *Eur J Anaesthesiol.* 1996; 13(5):485-491.
66. Chen PT, Liaw CC. Intravenous ondansetron plus intravenous dexamethasone with different ondansetron dosing schedules during multiple cycles of cisplatin-based chemotherapy. *Chang Gung Med J.* 2008; 31(2):167-174.
67. Cherian VT, Smith I. Prophylactic ondansetron does not improve patient satisfaction in women using PCA after Caesarean section. *Br J Anaesth.* 2001; 87(3):502-504.
68. Choi DK, Chin JH, Lee EH, Lim OB, Chung CH, Ro YJ *et al.* Prophylactic control of post-operative nausea and vomiting using ondansetron and ramosetron after cardiac surgery. *Acta Anaesthesiol Scand.* 2010; 54(8):962-969.
69. Choi YS, Shim JK, Ahn SH, Kwak YL. Efficacy comparison of ramosetron with ondansetron on preventing nausea and vomiting in high-risk patients following spine surgery with a single bolus of dexamethasone as an adjunct. *Korean J Anesthesiol.* 2012; 62(6):543-547.
70. Choi YS, Shim JK, Yoon do H, Jeon DH, Lee JY, Kwak YL. Effect of ramosetron on patient-controlled analgesia related nausea and vomiting after spine surgery in highly susceptible patients: comparison with ondansetron. *Spine (Phila Pa 1976).* 2008; 33(17):E602-606.
71. Cholwill JM, Wright W, Hobbs GJ, Curran J. Comparison of ondansetron and cyclizine for prevention of nausea and vomiting after day-case gynaecological laparoscopy. *Br J Anaesth.* 1999; 83(4):611-614.
72. Cohen IT, Joffe D, Hummer K, Soluri A. Ondansetron oral disintegrating tablets: acceptability and efficacy in children undergoing adenotonsillectomy. *Anesth Analg.* 2005; 101(1):59-63, table of contents.
73. Coloma M, White PF, Markowitz SD, Whitten CW, Macaluso AR, Berrisford SB *et al.* Dexamethasone in Combination with Dolasetron for Prophylaxis in the Ambulatory Setting: Effect on Outcome after Laparoscopic Cholecystectomy. *Anesthesiology.* 2002; 96(6):1346-1350.
74. Coloma M, White PF, Ogunnaike BO, Markowitz SD, Brown PM, Lee AQ *et al.* Comparison of acustimulation and ondansetron for the treatment of established postoperative nausea and vomiting. *Anesthesiology.* 2002; 97(6):1387-1392.
75. Contreras-Dominguez V, Carbonell-Bellolio P. Prophylactic antiemetic therapy for acute abdominal surgery. A comparative study of droperidol, metoclopramide, tropisetron, granisetron and dexamethasone. *Rev Bras Anesthesiol.* 2008; 58(1):35-44.
76. Cruz NI, Portilla P, Vela RE. Timing of ondansetron administration to prevent postoperative nausea and vomiting. *P R Health Sci J.* 2008; 27(1):43-47.
77. Dabbous A, Itani M, Kawas N, Karam V, Aouad M, Baraka A *et al.* Post-laparoscopic vomiting in females versus males: comparison of prophylactic antiemetic action of ondansetron versus metoclopramide. *JSLs.* 1998; 2(3):273-276.
78. Dabbous A, Khoury SJ, Chehab IR, Bartelmaos T, Khoury G. Ondansetron versus dehydrobenzoperidol and metoclopramide for management of postoperative nausea in laparoscopic surgery patients. *JSLs.* 2001; 5(2):139-142.

79. Dabbous AS, Jabbour-Khoury SI, Nasr VG, Moussa AA, Zbeidy RA, Khouzam NE *et al.* Dexamethasone with either granisetron or ondansetron for postoperative nausea and vomiting in laparoscopic surgery. *Middle East J Anaesthesiol.* 2010; 20(4):565-570.
80. Daftary S, Jagtap SR, Saksena S. Intravenous Ondansetron in prevention of PONV following tonsillectomy under ether anaesthesia. *Journal of Anaesthesiology Clinical Pharmacology.* 1998; 14(1):51-54.
81. D'Angelo R, Philip B, Gan TJ, Kovac A, Hantler C, Doblak D *et al.* A randomized, double-blind, close-ranging, pilot study of intravenous granisetron in the prevention of postoperative nausea and vomiting in patients abdominal hysterectomy. *Eur J Anaesthesiol.* 2005; 22(10):774-779.
82. Davies PR, Warwick P, O'Connor M. Antiemetic efficacy of ondansetron with patient-controlled analgesia. *Anaesthesia.* 1996; 51(9):880-882.
83. Davis A, Krige S, Moyes D. A double-blind randomized prospective study comparing ondansetron with droperidol in the prevention of emesis following strabismus surgery. *Anaesth Intensive Care.* 1995; 23(4):438-443.
84. Davis PJ, Fertal KM, Boretsky KR, Fedel GM, Ingram MD, Woelfel SK *et al.* The effects of oral ondansetron disintegrating tablets for prevention of at-home emesis in pediatric patients after ear-nose-throat surgery. *Anesth Analg.* 2008; 106(4):1117-1121, table of contents.
85. Davis PJ, McGowan FX, Jr., Landsman I, Maloney K, Hoffmann P. Effect of antiemetic therapy on recovery and hospital discharge time. A double-blind assessment of ondansetron, droperidol, and placebo in pediatric patients undergoing ambulatory surgery. *Anesthesiology.* 1995; 83(5):956-960.
86. de Orange FA, Marques J, Flores M, Borges PS. Dexamethasone versus ondansetron in combination with dexamethasone for the prophylaxis of postoperative vomiting in pediatric outpatients: a double-blind, randomized, placebo-controlled clinical trial. *Paediatr Anaesth.* 2012; 22(9):890-896.
87. Demiraran Y, Ozdemir I, Kocaman B, Hayit F, Demirci F. Comparison of costs and efficacy of intravenous and orally disintegrating ondansetron tablet as a prophylactic antiemetic therapy in major gynecologic operations. *Journal of the Turkish German Gynecology Association Artemis.* 2005; 6(2):134-138.
88. Dershwitz M, Conant JA, Chang Y, Rosow CE, Connors PM. A randomized, double-blind, dose-response study of ondansetron in the prevention of postoperative nausea and vomiting. *J Clin Anesth.* 1998; 10(4):314-320.
89. Desilva PH, Darvish AH, McDonald SM, Cronin MK, Clark K. The efficacy of prophylactic ondansetron, droperidol, perphenazine, and metoclopramide in the prevention of nausea and vomiting after major gynecologic surgery. *Anesth Analg.* 1995; 81(1):139-143.
90. Diemunsch P, Conseiller C, Clyti N, Mamet JP. Ondansetron compared with metoclopramide in the treatment of established postoperative nausea and vomiting. The French Ondansetron Study Group. *Br J Anaesth.* 1997; 79(3):322-326.
91. Diemunsch P, D'Hollander A, Paxton L, Schoeffler P, Wessel P, Nave S *et al.* Intravenous dolasetron mesilate in the prevention of postoperative nausea and vomiting in females undergoing gynecological surgery. *J Clin Anesth.* 1997; 9(5):365-373.
92. Diemunsch P, Gan TJ, Philip BK, Girao MJ, Eberhart L, Irwin MG *et al.* Single-dose aprepitant vs ondansetron for the prevention of postoperative nausea and vomiting: a randomized, double-blind phase III trial in patients undergoing open abdominal surgery. *Br J Anaesth.* 2007; 99(2):202-211.
93. Diemunsch P, Korttila K, Leeser J, Helmers JH, Wilkey B, Nave S *et al.* Oral dolasetron mesylate for prevention of postoperative nausea and vomiting: a multicenter, double-blind, placebo-controlled study. The Oral Dolasetron PONV Prevention Study Group. *J Clin Anesth.* 1998; 10(2):145-152.
94. Diemunsch P, Leeser J, Feiss P, D'Hollander A, Bradburn BG, Paxton D *et al.* Intravenous dolasetron mesilate ameliorates postoperative nausea and vomiting. *Can J Anaesth.* 1997; 44(2):173-181.
95. Doe EA, Jones P, O'Hara MA. A comparison of prophylactic ondansetron hydrochloride and droperidol for strabismus repair in adults. *J Pediatr Ophthalmol Strabismus.* 1998; 35(5):264-269; 286-267.
96. Dresner M, Dean S, Lumb A, Bellamy M. High-dose ondansetron regimen vs droperidol for morphine patient-controlled analgesia. *Br J Anaesth.* 1998; 81(3):384-386.
97. D'Souza N, Swami M, Bhagwat S. Comparative study of dexamethasone and ondansetron for prophylaxis of postoperative nausea and vomiting in laparoscopic gynecologic surgery. *Int J Gynaecol Obstet.* 2011; 113(2):124-127.
98. Du Pen S, Scuderi P, Wetchler B, Sung YF, Mingus M, Clayborn L *et al.* Ondansetron in the treatment of postoperative nausea and vomiting in ambulatory outpatients: a dose-comparative, stratified, multicentre study. *Eur J Anaesthesiol Suppl.* 1992; 6:55-62.
99. Dua N, Bhatnagar S, Mishra S, Singhal AK. Granisetron and ondansetron for prevention of nausea and vomiting in patients undergoing modified radical mastectomy. *Anaesth Intensive Care.* 2004; 32(6):761-764.
100. Dupeyron JP, Conseiller C, Levarlet M, Hemmingsen C, Schoeffler P, Pedersen FM *et al.* The effect of oral ondansetron in the prevention of postoperative nausea and vomiting after major gynaecological surgery performed under general anaesthesia. *Anaesthesia.* 1993; 48(3):214-218.
101. Eberhart LH, Buning EK, Folz B, Maybauer DM, Kastner M, Kalder M *et al.* Anti-emetic prophylaxis with oral tropisetron and/or dexamethasone. *Eur J Clin Invest.* 2006; 36(8):580-587.



102. Eberhart LH, Morin AM, Hoerle S, Wulf H, Geldner G. Droperidol and dolasetron alone or in combination for prevention of postoperative nausea and vomiting after vitrectomy. *Ophthalmology*. 2004; 111(8):1569-1575.
103. Eidi M, Kolaheidouzan K, Hosseinzadeh H, Tabaqi R. A comparison of preoperative ondansetron and dexamethasone in the prevention of post-tympanoplasty nausea and vomiting. *Iran J Med Sci*. 2012; 37(3):166-172.
104. Ekinçi O, Malat I, Isitmangil G, Aydin N. A randomized comparison of droperidol, metoclopramide, tropisetron, and ondansetron for the prevention of postoperative nausea and vomiting. *Gynecol Obstet Invest*. 2011; 71(1):59-65.
105. El-Deeb A, Abd el motlb E. Prophylactic multimodal antiemetic in women undergoing cesarean section under spinal anesthesia. *Egyptian Journal of Anaesthesia*. 2011; 27(2):107-111.
106. El-Deeb A, Ali Y, Rashdy H. Evaluation of combination antiemetic prophylaxis in high risk emetogenic patients undergoing thyroid surgery: A randomized double-blind study. *Egyptian Journal of Anaesthesia*. 2011; 27(4):203-206.
107. El-Deeb AM, Ahmady MS. Effect of acupuncture on nausea and/or vomiting during and after cesarean section in comparison with ondansetron. *J Anesth*. 2011; 25(5):698-703.
108. Elhakim M, Ghalaab M, Soliman M. Effects of odansetron and balanced analgesia on postoperative nausea and vomiting in laparoscopic surgery. *Acta Anaesthesiologica Italica*. 1995; 46(Suppl):23-28.
109. Elhakim M, Nafie M, Mahmoud K, Atef A. Dexamethasone 8 mg in combination with ondansetron 4 mg appears to be the optimal dose for the prevention of nausea and vomiting after laparoscopic cholecystectomy. *Can J Anaesth*. 2002; 49(9):922-926.
110. Ercelen O, Celiker V, Celebioglu B, Basgul E, Aypar U. Prevention from postoperative nausea and vomiting after strabismus surgery in children. *Acta Anaesthesiologica Italica*. 1996; 47(3):211-214.
111. Erhan Y, Erhan E, Aydede H, Yumus O, Yentur A. Ondansetron, granisetron, and dexamethasone compared for the prevention of postoperative nausea and vomiting in patients undergoing laparoscopic cholecystectomy : A randomized placebo-controlled study. *Surg Endosc*. 2008; 22(6):1487-1492.
112. Eriksson H, Korttila K. Recovery profile after desflurane with or without ondansetron compared with propofol in patients undergoing outpatient gynecological laparoscopy. *Anesth Analg*. 1996; 82(3):533-538.
113. Eryilmaz T, Sencan A, Camgoz N, Ak B, Yavuzer R. A challenging problem that concerns the aesthetic surgeon: postoperative nausea and vomiting. *Ann Plast Surg*. 2008; 61(5):489-491.
114. Kim EJ, Ko JS, Kim CS, Lee SM, Choi DH. Combination of antiemetics for the prevention of postoperative nausea and vomiting in high-risk patients. *J Korean Med Sci*. 2007; 22(5):878-882.
115. van den Berg AA. The prophylactic antiemetic efficacy of prochlorperazine and ondansetron in nasal septal surgery: a randomized double-blind comparison. *Anaesth Intensive Care*. 1996; 24(5):538-545.
116. van den Berg AA. Comparison of ondansetron and prochlorperazine for the prevention of nausea and vomiting after adenotonsillectomy. *Br J Anaesth*. 1996; 76(3):449-451.
117. van den Berg AA. A comparison of ondansetron and prochlorperazine for the prevention of nausea and vomiting after tympanoplasty. *Can J Anaesth*. 1996; 43(9):939-945.
118. Fabling JM, Gan TJ, El-Moalem HE, Warner DS, Borel CO. A randomized, double-blinded comparison of ondansetron, droperidol, and placebo for prevention of postoperative nausea and vomiting after supratentorial craniotomy. *Anesth Analg*. 2000; 91(2):358-361.
119. Fabling JM, Gan TJ, El-Moalem HE, Warner DS, Borel CO. A randomized, double-blind comparison of ondansetron versus placebo for prevention of nausea and vomiting after infratentorial craniotomy. *J Neurosurg Anesthesiol*. 2002; 14(2):102-107.
120. Farouk S. Ondansetron added to lidocaine for intravenous regional anaesthesia. *Eur J Anaesthesiol*. 2009; 26(12):1032-1036.
121. Feng PH, Chu KS, Lu IC, Shieh JP, Tzeng JI, Ho ST *et al*. Haloperidol plus ondansetron prevents postoperative nausea and vomiting in patients undergoing laparoscopic cholecystectomy. *Acta Anaesthesiol Taiwan*. 2009; 47(1):3-9.
122. Flynn BC, Nemergut EC. Postoperative nausea and vomiting and pain after transsphenoidal surgery: a review of 877 patients. *Anesth Analg*. 2006; 103(1):162-167, table of contents.
123. Furst SR, Rodarte A. Prophylactic antiemetic treatment with ondansetron in children undergoing tonsillectomy. *Anesthesiology*. 1994; 81(4):799-803.
124. Furst SR, Sullivan LJ, Soriano SG, McDermott JS, Adelson PD, Rockoff MA. Effects of ondansetron on emesis in the first 24 hours after craniotomy in children. *Anesth Analg*. 1996; 83(2):325-328.
125. Gan TJ, Apfel CC, Kovac A, Philip BK, Singla N, Minkowitz H *et al*. A randomized, double-blind comparison of the NK1 antagonist, aprepitant, versus ondansetron for the prevention of postoperative nausea and vomiting. *Anesth Analg*. 2007; 104(5):1082-1089, tables of contents.
126. Gan TJ, Candiotti KA, Klein SM, Rodriguez Y, Nielsen KC, White WD *et al*. Double-blind comparison of granisetron, promethazine, or a combination of both for the prevention of postoperative nausea and vomiting in females undergoing outpatient laparoscopies. *Can J Anaesth*. 2009; 56(11):829-836.

127. Gan TJ, Collis R, Hetreed M. Double-blind comparison of ondansetron, droperidol and saline in the prevention of postoperative nausea and vomiting. *Br J Anaesth*. 1994; 72(5):544-547.
128. Gan TJ, Coop A, Philip BK. A randomized, double-blind study of granisetron plus dexamethasone versus ondansetron plus dexamethasone to prevent postoperative nausea and vomiting in patients undergoing abdominal hysterectomy. *Anesth Analg*. 2005; 101(5):1323-1329.
129. Gan TJ, Franiak R, Reeves J. Ondansetron orally disintegrating tablet versus placebo for the prevention of postdischarge nausea and vomiting after ambulatory surgery. *Anesth Analg*. 2002; 94(5):1199-1200, table of contents.
130. Gan TJ, Gu J, Singla N, Chung F, Pearman MH, Bergese SD *et al*. Rolapitant for the prevention of postoperative nausea and vomiting: a prospective, double-blinded, placebo-controlled randomized trial. *Anesth Analg*. 2011; 112(4):804-812.
131. Gan TJ, Jiao KR, Zenn M, Georgiade G. A randomized controlled comparison of electro-acupoint stimulation or ondansetron versus placebo for the prevention of postoperative nausea and vomiting. *Anesth Analg*. 2004; 99(4):1070-1075, table of contents.
132. Gandhi R, Aruna J, Ajai K. Ondansetron/dexamethasone for prophylaxis against postoperative nausea and Vomiting. *Journal of Anaesthesiology Clinical Pharmacology*. 2009; 25(3):305-310.
133. Ganem EM, Fabris P, Moro MZ, Castiglia YMM. Eficácia do ondansetron e da alizaprida na prevenção de náusea e vômito em laparoscopia ginecológica. *Rev Bras Anestesiologia*. 2001; 51:401-406.
134. Gautam B, Shrestha BR, Lama P, Rai S. Antiemetic prophylaxis against postoperative nausea and vomiting with ondansetron-dexamethasone combination compared to ondansetron or dexamethasone alone for patients undergoing laparoscopic cholecystectomy. *Kathmandu Univ Med J (KUMJ)*. 2008; 6(23):319-328.
135. Gesztesi Z, Scuderi PE, White PF, Wright W, Wender RH, D'Angelo R *et al*. Substance P (Neurokinin-1) antagonist prevents postoperative vomiting after abdominal hysterectomy procedures. *Anesthesiology*. 2000; 93(4):931-937.
136. Goksu S, Kocoglu H, Bayazit YA, Yuksek S, Karci Y, Kanlikama M *et al*. Antiemetic effects of granisetron, droperidol and dexamethasone in otologic surgery. *Auris Nasus Larynx*. 2002; 29(3):253-256.
137. Goll V, Akça, O., Greif R, Freitag H, Arkiliç CF, Scheck T *et al*. Ondansetron is no more effective than supplemental intraoperative oxygen for prevention of postoperative nausea and vomiting. *Anesth Analg*. 2001; 92(1):112-117.
138. Gombar S, Kaur J, Kumar Gombar K, Dass A, Singh A. Superior anti-emetic efficacy of granisetron-dexamethasone combination in children undergoing middle ear surgery. *Acta Anaesthesiol Scand*. 2007; 51(5):621-624.
139. Goodarzi M. A double blind comparison of droperidol and ondansetron for prevention of emesis in children undergoing orthopaedic surgery. *Paediatr Anaesth*. 1998; 8(4):325-329.
140. Graczyk SG, McKenzie R, Kallar S, Hickok CB, Melson T, Morrill B *et al*. Intravenous dolasetron for the prevention of postoperative nausea and vomiting after outpatient laparoscopic gynecologic surgery. *Anesth Analg*. 1997; 84(2):325-330.
141. Grimsehl K, Whiteside JB, Mackenzie N. Comparison of cyclizine and ondansetron for the prevention of postoperative nausea and vomiting in laparoscopic day-case gynaecological surgery. *Anaesthesia*. 2002; 57(1):61-65.
142. Grond S, Lynch J, Diefenbach C, Altröck K, Lehmann KA. Comparison of ondansetron and droperidol in the prevention of nausea and vomiting after inpatient minor gynecologic surgery. *Anesth Analg*. 1995; 81(3):603-607.
143. Grover VK, Mathew PJ, Hegde H. Efficacy of orally disintegrating ondansetron in preventing postoperative nausea and vomiting after laparoscopic cholecystectomy: a randomised, double-blind placebo controlled study. *Anaesthesia*. 2009; 64(6):595-600.
144. Gulhas N, Erdil FA, Sagir O, Gedik E, Tugal T, Begec Z *et al*. Lornoxicam and ondansetron for the prevention of intrathecal fentanyl-induced pruritus. *J Anesth*. 2007; 21(2):159-163.
145. Gunter JB, McAuliffe JJ, Beckman EC, Wittkugel EP, Spaeth JP, Varughese AM. A factorial study of ondansetron, metoclopramide, and dexamethasone for emesis prophylaxis after adenotonsillectomy in children. *Paediatr Anaesth*. 2006; 16(11):1153-1165.
146. Gupta P, Khanna J, Mitramustafi AK, Bhartia VK. Role of pre-operative dexamethasone as prophylaxis for postoperative nausea and vomiting in laparoscopic surgery. *J Minim Access Surg*. 2006; 2(1):12-15.
147. Gupta V, Wakhloo R, Mehta A, Gupta SD. Prophylactic antiemetic therapy with ondansetron, granisetron and metoclopramide in patients undergoing laparoscopic cholecystectomy under GA. *10*. 2008; 2(74-77).
148. Gurler T, Celik N, Totan S, Songur E, Sakarya M. Prophylactic use of ondansetron for emesis after craniofacial operations in children. *J Craniofac Surg*. 1999; 10(1):45-48.
149. Hahm TS, Ko JS, Choi SJ, Gwak MS. Comparison of the prophylactic anti-emetic efficacy of ramosetron and ondansetron in patients at high-risk for postoperative nausea and vomiting after total knee replacement. *Anaesthesia*. 2010; 65(5):500-504.
150. Hamid SK, Selby IR, Sikich N, Lerman J. Vomiting after adenotonsillectomy in children: a comparison of ondansetron, dimenhydrinate, and placebo. *Anesth Analg*. 1998; 86(3):496-500.

151. Han DW, Hong SW, Kwon JY, Lee JW, Kim KJ. Epidural ondansetron is more effective to prevent postoperative pruritus and nausea than intravenous ondansetron in elective cesarean delivery. *Acta Obstet Gynecol Scand.* 2007; 86(6):683-687.
152. Han SH, Lim YJ, Ro YJ, Lee SC, Park YS, Kim YC. Efficacy of prophylactic ondansetron in a patient-controlled analgesia environment. *J Int Med Res.* 2004; 32(2):160-165.
153. Hanaoka K, Toyooka H, Kugimiya T, Ohashi Y, Granisetron Study Group of J. Efficacy of prophylactic intravenous granisetron in postoperative emesis in adults. *J Anesth.* 2004; 18(3):158-165.
154. Harnett MJ, O'Rourke N, Walsh M, Carabuena JM, Segal S. Transdermal scopolamine for prevention of intrathecal morphine-induced nausea and vomiting after cesarean delivery. *Anesth Analg.* 2007; 105(3):764-769.
155. Hartsell T, Long D, Kirsch JR. The efficacy of postoperative ondansetron (Zofran) orally disintegrating tablets for preventing nausea and vomiting after acoustic neuroma surgery. *Anesth Analg.* 2005; 101(5):1492-1496.
156. Helmers JH, Briggs L, Abrahamsson J, Soni J, Moodley J, Forrler M *et al.* A single i.v. dose of ondansetron 8 mg prior to induction of anaesthesia reduces postoperative nausea and vomiting in gynaecological patients. *Can J Anaesth.* 1993; 40(12):1155-1161.
157. Helmy SA. Prophylactic anti-emetic efficacy of ondansetron in laparoscopic cholecystectomy under total intravenous anaesthesia. A randomised, double-blind comparison with droperidol, metoclopramide and placebo. *Anaesthesia.* 1999; 54(3):266-271.
158. Honkavaara P. Effect of ondansetron on nausea and vomiting after middle ear surgery during general anaesthesia. *Br J Anaesth.* 1996; 76(2):316-318.
159. Huh BK, Jung S, White W, Jeon Y. Anti-emetic effect of midazolam added to morphine patient-controlled analgesia after total abdominal hysterectomy. *Anaesth Intensive Care.* 2010; 38(3):481-485.
160. Iatrou CA, Dragoumanis CK, Vogiatzaki TD, Vretzakis GI, Simopoulos CE, Dimitriou VK. Prophylactic intravenous ondansetron and dolasetron in intrathecal morphine-induced pruritus: a randomized, double-blinded, placebo-controlled study. *Anesth Analg.* 2005; 101(5):1516-1520.
161. Isik B, Cekmen N, Arslan M, Ozsoylar O, Kordan AZ, Akcabay M. Comparison of the antiemetic effects of ondansetron and dexamethasone on middle ear surgery. *Saudi Med J.* 2006; 27(5):646-651.
162. Islam MR, Haq MF, Islam MA, Meftahuzzaman SM, Sarkar SC, Rashid H *et al.* Preoperative use of granisetron plus dexamethasone and granisetron alone in prevention of post operative nausea and vomiting in tonsillectomy. *Mymensingh Med J.* 2011; 20(3):386-390.
163. Jain V, Mitra JK, Rath GP, Prabhakar H, Bithal PK, Dash HH. A randomized, double-blinded comparison of ondansetron, granisetron, and placebo for prevention of postoperative nausea and vomiting after supratentorial craniotomy. *J Neurosurg Anesthesiol.* 2009; 21(3):226-230.
164. Janicki PK, Schuler HG, Jarzembowski TM, Rossi M, 2nd. Prevention of postoperative nausea and vomiting with granisetron and dolasetron in relation to CYP2D6 genotype. *Anesth Analg.* 2006; 102(4):1127-1133.
165. Janknegt R, Pinckaers JW, Rohof MH, Ausems ME, Arbouw ME, van der Velden RW *et al.* Double-blind comparative study of droperidol, granisetron and granisetron plus dexamethasone as prophylactic anti-emetic therapy in patients undergoing abdominal, gynaecological, breast or otolaryngological surgery. *Anaesthesia.* 1999; 54(11):1059-1068.
166. Jee YS, Yoon HJ, Jang CH. Prophylactic antiemetic effects in gynecologic patients receiving fentanyl IV-patient controlled analgesia: comparison of combined treatment with ondansetron and dexamethasone with metoclopramide and dexamethasone. *Korean J Anesthesiol.* 2010; 59(5):335-339.
167. Jellish WS, Leonetti JP, Fluder E, Thalji Z. Ondansetron versus droperidol or placebo to prevent nausea and vomiting after otologic surgery. *Otolaryngol Head Neck Surg.* 1998; 118(6):785-789.
168. Jellish WS, Leonetti JP, Sawicki K, Anderson D, Origitano TC. Morphine/ondansetron PCA for postoperative pain, nausea, and vomiting after skull base surgery. *Otolaryngol Head Neck Surg.* 2006; 135(2):175-181.
169. Jellish WS, Owen K, Fluder E, Sawicki K, Sinacore J. Patient-controlled analgesia combined with either ondansetron or ondansetron plus prochlorperazine for control of pain and nausea and vomiting in patients undergoing abdominal surgery. *J Clin Anesth.* 2008; 20(8):594-600.
170. Johns RA, Hanousek J, Montgomery JE. A comparison of cyclizine and granisetron alone and in combination for the prevention of postoperative nausea and vomiting. *Anaesthesia.* 2006; 61(11):1053-1057.
171. Jokela R, Ahonen J, Seitsonen E, Marjakangas P, Korttila K. The influence of ondansetron on the analgesic effect of acetaminophen after laparoscopic hysterectomy. *Clin Pharmacol Ther.* 2010; 87(6):672-678.
172. Jokela R, Koivuranta M, Kangas-Saarela T, Purhonen S, Alahuhta S. Oral ondansetron, tropisetron or metoclopramide to prevent postoperative nausea and vomiting: a comparison in high-risk patients undergoing thyroid or parathyroid surgery. *Acta Anaesthesiol Scand.* 2002; 46(5):519-524.
173. Jokela RM, Kangas-Saarela TA, Valanne JV, Koivuranta MK, Ranta PO, Alahuhta SM. Postoperative nausea and vomiting after sevoflurane with or without ondansetron compared with propofol in female patients undergoing breast surgery. *Anesth Analg.* 2000; 91(5):1062-1065.

174. Kabalak AA, Akcay M, Akcay F, Gogus N. Transcutaneous electrical acupoint stimulation versus ondansetron in the prevention of postoperative vomiting following pediatric tonsillectomy. *J Altern Complement Med.* 2005; 11(3):407-413.
175. Kaki AM, Abd El-Hakeem EE. Prophylaxis of postoperative nausea and vomiting with ondansetron, metoclopramide, or placebo in total intravenous anesthesia patients undergoing laparoscopic cholecystectomy. *Saudi Med J.* 2008; 29(10):1408-1413.
176. Karamanlioglu B, Turan A, Memis D, Sut N. Comparison of oral dolasetron and ondansetron in the prophylaxis of postoperative nausea and vomiting in children. *Eur J Anaesthesiol.* 2003; 20(10):831-835.
177. Kathirvel S, Dash HH, Bhatia A, Subramaniam B, Prakash A, Shenoy S. Effect of prophylactic ondansetron on postoperative nausea and vomiting after elective craniotomy. *J Neurosurg Anesthesiol.* 2001; 13(3):207-212.
178. Kathirvel S, Shende D, Madan R. Comparison of anti-emetic effects of ondansetron, metoclopramide or a combination of both in children undergoing surgery for strabismus. *Eur J Anaesthesiol.* 1999; 16(11):761-765.
179. Kaufmann MA, Rosow C, Schnieper P, Schneider M. Prophylactic antiemetic therapy with patient-controlled analgesia: a double-blind, placebo-controlled comparison of droperidol, metoclopramide, and tropisetron. *Anesth Analg.* 1994; 78(5):988-994.
180. Kaul HL, Rao U, Mandal NG, Rahman A. Comparative evaluation of single dose oral Ondansetron and Metoclopramide in a placebo controlled study for prevention of postoperative nausea and vomiting. *Journal of Anaesthesiology Clinical Pharmacology.* 1996; 12(1):27-30.
181. Kenny GN, Oates JD, Leeser J, Rowbotham DJ, Lip H, Rust M *et al.* Efficacy of orally administered ondansetron in the prevention of postoperative nausea and vomiting: a dose ranging study. *Br J Anaesth.* 1992; 68(5):466-470.
182. Khalil S, Philbrook L, Rabb M, Wells L, Aves T, Villanueva G *et al.* Ondansetron/promethazine combination or promethazine alone reduces nausea and vomiting after middle ear surgery. *J Clin Anesth.* 1999; 11(7):596-600.
183. Khalil S, Rodarte A, Weldon BC, Weinstein M, Grunwald Z, Ginsberg B *et al.* Intravenous ondansetron in established postoperative emesis in children. S3A-381 Study Group. *Anesthesiology.* 1996; 85(2):270-276.
184. Khalil SN, Kataria B, Pearson K, Conahan T, Kallar S, Zahl K *et al.* Ondansetron prevents postoperative nausea and vomiting in women outpatients. *Anesth Analg.* 1994; 79(5):845-851.
185. Khalil SN, Roth AG, Cohen IT, Simhi E, Ansermino JM, Bolos ME *et al.* A double-blind comparison of intravenous ondansetron and placebo for preventing postoperative emesis in 1- to 24-month-old pediatric patients after surgery under general anesthesia. *Anesth Analg.* 2005; 101(2):356-361, table of contents.
186. Khan A, Iqbal M, Yunus A, Ali K. Comparison of ondansetron and metoclopramide in the prevention of post-operative nausea and vomiting after laparoscopic cholecystectomy. *Pakistan Journal of Medical and Health Sciences.* 2011; 5(4):674-676.
187. Khan MP, Kohli M, Kumar GA, Singh V. Granisetron and granisetron dexamethasone combination for prevention of postoperative nausea and vomiting after laparoscopic cholecystectomy: A double blind, placebo controlled study *J Anaesthesiol Clin Pharmacol.* 2006; 22(3):261-265.
188. Khan P. Comparative study between granisetron ondansetron and propofol for the prevention of emesis after gynaecological laparoscopy. *Journal of Postgraduate Medical Institute.* 2005; 19(2):135-143.
189. Kim SI, Kim SC, Baek YH, Ok SY, Kim SH. Comparison of ramosetron with ondansetron for prevention of postoperative nausea and vomiting in patients undergoing gynaecological surgery. *Br J Anaesth.* 2009; 103(4):549-553.
190. Kimya Y, Tatlikazan S, Bilgin H, Bilgin T, Cengiz C. Ondansetron: The prevention of nausea and vomiting in gynecologic operations. *Turkish Journal of Medical Sciences.* 1996; 26(4):339-342.
191. Klockgether-Radke A, Neumann S, Neumann P, Braun U, Muhlendyck H. Ondansetron, droperidol and their combination for the prevention of post-operative vomiting in children. *Eur J Anaesthesiol.* 1997; 14(4):362-367.
192. Kocamanoglu IS, Baris S, Karakaya D, Sener B, Tur A, Cetinkaya M. Effects of granisetron with droperidol or dexamethasone on prevention of postoperative nausea and vomiting after general anesthesia for cesarean section. *Methods Find Exp Clin Pharmacol.* 2005; 27(7):489-493.
193. Koh IJ, Chang CB, Jeon YT, Ryu JH, Kim TK. Does ramosetron reduce postoperative emesis and pain after TKA? *Clin Orthop Relat Res.* 2012; 470(6):1718-1727.
194. Koivuranta M, Ala-Kokko TI, Jokela R, Ranta P. Comparison of ondansetron and tropisetron combined with droperidol for the prevention of emesis in women with a history of post-operative nausea and vomiting. *Eur J Anaesthesiol.* 1999; 16(6):390-395.
195. Koivuranta M, Laara E, Ranta P, Ravaska P, Alahuhta S. Comparison of ondansetron and droperidol in the prevention of postoperative nausea and vomiting after laparoscopic surgery in women. A randomised, double-blind, placebo-controlled trial. *Acta Anaesthesiol Scand.* 1997; 41(10):1273-1279.
196. Koivuranta MK, Laara E, Ryhanen PT. Antiemetic efficacy of prophylactic ondansetron in laparoscopic cholecystectomy. A randomised, double-blind, placebo-controlled trial. *Anaesthesia.* 1996; 51(1):52-55.

197. Kolm A, Ferraz AA, Modolo NS, Ferrari F, Ganem EM, Rodrigues Junior GR *et al.* [Prevention of itching after spinal sufentanil: effects of droperidol, nalbuphine, ondansetron and the association of them.]. *Rev Bras Anesthesiol.* 2006; 56(1):28-33.
198. Kontrimaviciute E, Baublys A, Ivaskevicius J. Postoperative nausea and vomiting in patients undergoing total abdominal hysterectomy under spinal anaesthesia: a randomized study of ondansetron prophylaxis. *Eur J Anaesthesiol.* 2005; 22(7):504-509.
199. Kothari SN, Boyd WC, Bottcher ML, Lambert PJ. Antiemetic efficacy of prophylactic dimenhydrinate (Dramamine) vs ondansetron (Zofran): a randomized, prospective trial inpatients undergoing laparoscopic cholecystectomy. *Surg Endosc.* 2000; 14(10):926-929.
200. Kovac A, McKenzie R, O'Connor T, Duncalf D, Angel J, Gratz I *et al.* Prophylactic intravenous ondansetron in female outpatients undergoing gynaecological surgery: a multicentre dose-comparison study. *Eur J Anaesthesiol Suppl.* 1992; 6:37-47.
201. Kovac AL, Eberhart L, Kotarski J, Clerici G, Apfel C, Palonosetron 04-07 Study G. A randomized, double-blind study to evaluate the efficacy and safety of three different doses of palonosetron versus placebo in preventing postoperative nausea and vomiting over a 72-hour period. *Anesth Analg.* 2008; 107(2):439-444.
202. Kovac AL, O'Connor TA, Pearman MH, Kekoler LJ, Edmondson D, Baughman VL *et al.* Efficacy of repeat intravenous dosing of ondansetron in controlling postoperative nausea and vomiting: a randomized, double-blind, placebo-controlled multicenter trial. *J Clin Anesth.* 1999; 11(6):453-459.
203. Kovac AL, Pearman MH, Khalil SN, Scuderi PE, Joslyn AF, Prillaman BA *et al.* Ondansetron prevents postoperative emesis in male outpatients. S3A-379 Study Group. *J Clin Anesth.* 1996; 8(8):644-651.
204. Kovac AL, Scuderi PE, Boerner TF, Chelly JE, Goldberg ME, Hantler CB *et al.* Treatment of postoperative nausea and vomiting with single intravenous doses of dolasetron mesylate: a multicenter trial. Dolasetron Mesylate PONV Treatment Study Group. *Anesth Analg.* 1997; 85(3):546-552.
205. Kreisler NS, Spiekermann BF, Ascari CM, Rhyne HA, Kloth RL, Sullivan LM *et al.* Small-dose droperidol effectively reduces nausea in a general surgical adult patient population. *Anesth Analg.* 2000; 91(5):1256-1261.
206. Krobbuaban B, Pitakpol S, Diregpoke S. Ondansetron vs. metoclopramide for the prevention of nausea and vomiting after gynecologic surgery. *J Med Assoc Thai.* 2008; 91(5):669-674.
207. Ku PK, Tong MC, Lo P, van Hasselt CA. Efficacy of ondansetron for prevention of postoperative nausea and vomiting after outpatient ear surgery under local anesthesia. *Am J Otol.* 2000; 21(1):24-27.
208. Kumar A, Agarwal M, Bhattacharya A. Effect of Ondansetron and metoclopramide on vigilance, cognition and recovery time following major gynaecological surgery. *Journal of Anaesthesiology Clinical Pharmacology.* 1996; 12(1):35-38.
209. Kushwaha BB, Chakraborty A, Agarwal J, Malick A, Bushan S, Bhattacharya P. Comparative study of granisetron and ondansetron alone and their combination with dexamethasone, for prevention of PONV in middle ear surgery. *Internet Journal of Anesthesiology.* 2007; 13(2):10.
210. Kyokong O, Somboonviboon W, Visalyaputra S, Pausawadi S, Saratan P, Vongvises P. Comparison of ondansetron and placebo for preventing postoperative nausea and emesis in gastrointestinal tract surgery: a multicenter randomized controlled trial. *J Med Assoc Thai.* 1999; 82(2):173-177.
211. Lahsaei SM, Amini A, Tabatabaei SM, Mehrabani G. A comparison between cetirizine and ondansetron in preventing postoperative nausea and vomiting in adults. *J Res Med Sci.* 2012; 17(8):760-763.
212. Larijani GE, Gratz I, Afshar M, Minassian S. Treatment of postoperative nausea and vomiting with ondansetron: a randomized, double-blind comparison with placebo. *Anesth Analg.* 1991; 73(3):246-249.
213. Lawhorn CD, Bower C, Brown RE, Jr., Schmitz ML, Kymer PJ, Stoner J *et al.* Ondansetron decreases postoperative vomiting in pediatric patients undergoing tonsillectomy and adenoidectomy. *Int J Pediatr Otorhinolaryngol.* 1996; 36(2):99-108.
214. Lawhorn CD, Kymer PJ, Stewart FC, Stoner JM, Shirey R, Volpe P. Ondansetron dose response curve in high-risk pediatric patients. *J Clin Anesth.* 1997; 9(8):637-642.
215. Lee HJ, Kwon JY, Shin SW, Kim CH, Baek SH, Baik SW *et al.* Preoperatively administered ramosetron oral disintegrating tablets for preventing nausea and vomiting associated with patient-controlled analgesia in breast cancer patients. *Eur J Anaesthesiol.* 2008; 25(9):756-762.
216. Lee JW, Park HJ, Choi J, Park SJ, Kang H, Kim EG. Comparison of ramosetron's and ondansetron's preventive anti-emetic effects in highly susceptible patients undergoing abdominal hysterectomy. *Korean J Anesthesiol.* 2011; 61(6):488-492.
217. Lee SY, Lee JY, Park SY, Kim JH, Cho OG, Kim JS *et al.* Prophylactic antiemetic efficacy of granisetron or ramosetron in patients undergoing thyroidectomy. *Asian J Surg.* 2002; 25(4):309-314.
218. Lee TH, Lin CR, Lee TC, Buerkle H, Hsu TY, Mao CC *et al.* Failure of prevention against postoperative vomiting by ondansetron or prochlorperazine in patients undergoing gynecological laparoscopy. *Acta Anaesthesiol Sin.* 2000; 38(4):201-205.
219. Lee Y, Wang PK, Lai HY, Yang YL, Chu CC, Wang JJ. Haloperidol is as effective as ondansetron for preventing postoperative nausea and vomiting. *Can J Anaesth.* 2007; 54(5):349-354.

220. Leeser J, Lip H. Prevention of postoperative nausea and vomiting using ondansetron, a new, selective, 5-HT<sub>3</sub> receptor antagonist. *Anesth Analg.* 1991; 72(6):751-755.
221. Lekprasert V, Meesangnil S, Pausawasdi S, Pongravee V. Efficacy of prophylactic ondansetron in Thai patients undergoing gastrointestinal tract surgery. *J Med Assoc Thai.* 1996; 79(6):382-387.
222. Leksowski K, Peryga P, Szyca R. Ondansetron, metoclopramide, dexamethasone, and their combinations compared for the prevention of postoperative nausea and vomiting in patients undergoing laparoscopic cholecystectomy: a prospective randomized study. *Surg Endosc.* 2006; 20(6):878-882.
223. Liberman MA, Howe S, Lane M. Ondansetron versus placebo for prophylaxis of nausea and vomiting in patients undergoing ambulatory laparoscopic cholecystectomy. *Am J Surg.* 2000; 179(1):60-62.
224. Litman RS, Wu CL, Catanzaro FA. Ondansetron decreases emesis after tonsillectomy in children. *Anesth Analg.* 1994; 78(3):478-481.
225. Litman RS, Wu CL, Lee A, Griswold JD, Voisine R, Marshall C. Prevention of emesis after strabismus repair in children: a prospective, double-blinded, randomized comparison of droperidol versus ondansetron. *J Clin Anesth.* 1995; 7(1):58-62.
226. Loewen P, Lamb S, Clugston P. Randomized, double-blind trial of dolasetron versus droperidol for prophylaxis of postoperative nausea and vomiting in patients undergoing TRAM flap breast reconstruction surgery. *Ann Plast Surg.* 2003; 51(5):472-477.
227. Lopez-Olaondo L, Carrascosa F, Pueyo FJ, Monedero P, Busto N, Saez A. Combination of ondansetron and dexamethasone in the prophylaxis of postoperative nausea and vomiting. *Br J Anaesth.* 1996; 76(6):835-840.
228. Maddali MM, Mathew J, Zarroug AW. Postoperative nausea and vomiting in diagnostic gynaecological laparoscopic procedures: comparison of the efficacy of the combination of dexamethasone and metoclopramide with that of dexamethasone and ondansetron. *Journal of Postgraduate Medical Institute.* 2003; 49(4):302-306.
229. Madenoglu H, Akdemir C, Aksu R, Bicer C, Ulgey A, Boyaci A. The effect of palonosetron on postoperative nausea and vomiting in supratentorial craniotomy patients. *Turkish Journal of Medical Sciences.* 2012; 42:1241-1246.
230. Maestre JM, Puente J, Dierssen T. Prevention of postoperative nausea and vomiting with metoclopramide, droperidol and ondansetron: a randomized, double-blind comparison with placebo in ambulatory surgery. *Ambulatory Surgery.* 1997; 5(4):153-159.
231. Malins AF, Field JM, Nesling PM, Cooper GM. Nausea and vomiting after gynaecological laparoscopy: comparison of premedication with oral ondansetron, metoclopramide and placebo. *Br J Anaesth.* 1994; 72(2):231-233.
232. Manani G, Cantele P, Dona B, Meroni M, Tiberio I, Ceschin C *et al.* Oculo-emetic and oculo-cardiac reflex in the prevention of postoperative nausea and vomiting by dihydrobenzperidol and ondansetron after squint surgery. *Acta Anaesthesiologica Italica.* 1996; 47(3):201-209.
233. Marcus JR, Few JW, Chao JD, Fine NA, Mustoe TA. The prevention of emesis in plastic surgery: a randomized, prospective study. *Plast Reconstr Surg.* 2002; 109(7):2487-2494.
234. McCall JE, Stubbs K, Saylor S, Pohlman S, Ivers B, Smith S *et al.* The search for cost-effective prevention of postoperative nausea and vomiting in the child undergoing reconstructive burn surgery: ondansetron versus dimenhydrinate. *J Burn Care Rehabil.* 1999; 20(4):309-315.
235. McKenzie R, Kovac A, O'Connor T, Duncalf D, Angel J, Gratz I *et al.* Comparison of ondansetron versus placebo to prevent postoperative nausea and vomiting in women undergoing ambulatory gynecologic surgery. *Anesthesiology.* 1993; 78(1):21-28.
236. McKenzie R, Riley TJ, Tantisira B, Hamilton DL. Effect of propofol for induction and ondansetron with or without dexamethasone for the prevention of nausea and vomiting after major gynecologic surgery. *J Clin Anesth.* 1997; 9(1):15-20.
237. McKenzie R, Sharifi-Azad S, Dershwitz M, Miguel R, Joslyn AF, Tantisira B *et al.* A randomized, double-blind pilot study examining the use of intravenous ondansetron in the prevention of postoperative nausea and vomiting in female inpatients. *J Clin Anesth.* 1993; 5(1):30-36.
238. Metaxari M, Papaioannou A, Petrou A, Chatzimichali A, Pharmakalidou E, Askitopoulou H. Antiemetic prophylaxis in thyroid surgery: a randomized, double-blind comparison of three 5-HT<sub>3</sub> agents. *J Anesth.* 2011; 25(3):356-362.
239. Meyer TA, Roberson CR, Rajab MH, Davis J, McLeskey CH. Dolasetron versus ondansetron for the treatment of postoperative nausea and vomiting. *Anesth Analg.* 2005; 100(2):373-377.
240. Mikawa K, Takao Y, Nishina K, Maekawa N, Obara H. The antiemetic efficacy of prophylactic granisetron in gynecologic surgery. *Anesth Analg.* 1995; 80(5):970-974.
241. Mikawa K, Takao Y, Nishina K, Shiga M, Maekawa N, Obara H. Optimal dose of granisetron for prophylaxis against postoperative emesis after gynecological surgery. *Anesth Analg.* 1997; 85(3):652-656.
242. Millio J, Siddons M, Innes R, Laurie PS. Randomised double-blind comparison of ondansetron and droperidol to prevent postoperative nausea and vomiting associated with patient-controlled analgesia. *Anaesthesia.* 2001; 56(1):60-65.

243. Mishra AR, Srivastava U, Kumar D, Saraswat N, Kumar A, Payal YS *et al*. Nausea and vomiting after ENT surgeries: A comparison between ondansetron, metoclopramide and small dose of propofol. *Indian J Otolaryngol Head Neck Surg*. 2010; 62(1):29-31.
244. Misra MN, Pullani AJ, Mohamed ZU. Prevention of PONV by acustimulation with capsicum plaster is comparable to ondansetron after middle ear surgery. *Can J Anaesth*. 2005; 52(5):485-489.
245. Moens P, Levarlet M, Hendrickx P, De Guchteneere E. Single i.v. bolus dose of ondansetron in the prevention of postoperative nausea and emesis. *Acta Anaesthesiol Belg*. 1997; 48(4):245-250.
246. Monagle J, Barnes R, Goodchild C, Hewitt M. Ondansetron is not superior to moderate dose metoclopramide in the prevention of post-operative nausea and vomiting after minor gynaecological surgery. *Eur J Anaesthesiol*. 1997; 14(6):604-609.
247. Moon YE, Joo J, Kim JE, Lee Y. Anti-emetic effect of ondansetron and palonosetron in thyroidectomy: a prospective, randomized, double-blind study. *Br J Anaesth*. 2012; 108(3):417-422.
248. Morris RW, Aune H, Feiss P, Hanson A, Hasselstrom L, Maltby JR *et al*. International, multicentre, placebo-controlled study to evaluate the effectiveness of ondansetron vs. metoclopramide in the prevention of post-operative nausea and vomiting. *Eur J Anaesthesiol*. 1998; 15(1):69-79.
249. Morton NS, Camu F, Dorman T, Knudsen KE, Kvalsvik O, Nellgard P *et al*. Ondansetron reduces nausea and vomiting after paediatric adenotonsillectomy. *Paediatr Anaesth*. 1997; 7(1):37-45.
250. Moussa AA, Oregan PJ. Prevention of postoperative nausea and vomiting in patients undergoing laparoscopic bariatric surgery--granisetron alone vs granisetron combined with dexamethasone/droperidol. *Middle East J Anesthesiol*. 2007; 19(2):357-367.
251. Mullick P, Prakash S, Naithani BK, Pawar M. The anti-emetic efficacy of a combination of ondansetron and metoclopramide. *Journal of Anaesthesiology Clinical Pharmacology*. 2002; 18(2):177-181.
252. Munro FJ, Fisher S, Dickson U, Morton N. The addition of antiemetics to the morphine solution in patient controlled analgesia syringes used by children after an appendectomy does not reduce the incidence of postoperative nausea and vomiting. *Paediatr Anaesth*. 2002; 12(7):600-603.
253. Munro HM, D'Errico CC, Lauder GR, Wagner DS, Voepel-Lewis T, Tait AR. Oral granisetron for strabismus surgery in children. *Can J Anaesth*. 1999; 46(1):45-48.
254. Naguib M, el Bakry AK, Khoshim MH, Channa AB, el Gammal M, el Gammal K *et al*. Prophylactic antiemetic therapy with ondansetron, tropisetron, granisetron and metoclopramide in patients undergoing laparoscopic cholecystectomy: a randomized, double-blind comparison with placebo. *Can J Anaesth*. 1996; 43(3):226-231.
255. Najeeb R, Naqash I, Shah ZA, Habib M, Kant S. 'A comparative study of two antiemetics: Droperidol and Granisetron in the prevention of post anaesthesia nausea and vomiting'. *JK Practitioner*. 2000; 7(1):52-54.
256. Ng WW, Li AC, Lee DW, Leung TL, Ko CW, Leung KF *et al*. Effectiveness of Ondansetron to prevent postoperative nausea and vomiting in ambulatory two port needlescopic cholecystectomy: a randomised controlled trial. *Ambulatory surgery*. 2008; 14(2):1-14.
257. O'Brien B, Nevin B, Patterson K. A comparison of papaveretum-promethazine with morphine-ondansetron for patient-controlled analgesia. *Ir J Med Sci*. 2000; 169(1):58-59.
258. O'Brien CM, Titley G, Whitehurst P. A comparison of cyclizine, ondansetron and placebo as prophylaxis against postoperative nausea and vomiting in children. *Anaesthesia*. 2003; 58(7):707-711.
259. Oksuz H, Zencirci B, Ezberci M. Comparison of the effectiveness of metoclopramide, ondansetron, and granisetron on the prevention of nausea and vomiting after laparoscopic cholecystectomy. *J Laparoendosc Adv Surg Tech A*. 2007; 17(6):803-808.
260. Olatosi OJ, Kushimo O, Okeke C, Oriyomi O, Ajayi GO. Antiemetic prophylaxis with promethazine or ondansetron in major gynaecological surgery. *Southern African Journal of Anaesthesia and Analgesia*. 2008; 14(6):39-42.
261. Olutoye O, Jantzen EC, Alexis R, Rajchert D, Schreiner MS, Watcha MF. A comparison of the costs and efficacy of ondansetron and dolasetron in the prophylaxis of postoperative vomiting in pediatric patients undergoing ambulatory surgery. *Anesth Analg*. 2003; 97(2):390-396, table of contents.
262. Omar SH, Kamel NM, Radwan KG, Ebied RS, Ali MZ, Osman ES *et al*. Sub-antibiotic doses of erythromycin as a prokinetic in abdominal surgeries: reviving the old. *J Egypt Soc Parasitol*. 2010; 40(3):809-820.
263. Ozmen S, Yavuz L, Ceylan BG, Tarhan O, Aydin C. Comparison of granisetron with granisetron plus droperidol combination prophylaxis in post-operative nausea and vomiting after laparoscopic cholecystectomy. *J Int Med Res*. 2002; 30(5):520-524.
264. Paech MJ, Lee BH, Evans SF. The effect of anaesthetic technique on postoperative nausea and vomiting after day-case gynaecological laparoscopy. *Anaesth Intensive Care*. 2002; 30(2):153-159.
265. Paech MJ, Pavy TJ, Evans SF. Single-dose prophylaxis for postoperative nausea and vomiting after major abdominal surgery: ondansetron versus droperidol. *Anaesth Intensive Care*. 1995; 23(5):548-554.
266. Paech MJ, Rucklidge MW, Banks SL, Gurrin LC, Orlikowski CE, Pavy TJ. The efficacy and cost-effectiveness of prophylactic 5-hydroxytryptamine<sub>3</sub> receptor antagonists: tropisetron, ondansetron and dolasetron. *Anaesth Intensive Care*. 2003; 31(1):11-17.

267. Paech MJ, Rucklidge MW, Lain J, Dodd PH, Bennett EJ, Doherty DA. Ondansetron and dexamethasone dose combinations for prophylaxis against postoperative nausea and vomiting. *Anesth Analg.* 2007; 104(4):808-814.
268. Pan PH, Lee SC, Harris LC. Antiemetic prophylaxis for postdischarge nausea and vomiting and impact on functional quality of living during recovery in patients with high emetic risks: a prospective, randomized, double-blind comparison of two prophylactic antiemetic regimens. *Anesth Analg.* 2008; 107(2):429-438.
269. Pan PH, Moore CH. Intraoperative antiemetic efficacy of prophylactic ondansetron versus droperidol for cesarean section patients under epidural anesthesia. *Anesth Analg.* 1996; 83(5):982-986.
270. Pan PH, Moore CH. Comparing the efficacy of prophylactic metoclopramide, ondansetron, and placebo in cesarean section patients given epidural anesthesia. *J Clin Anesth.* 2001; 13(6):430-435.
271. Park JW, Jun JW, Lim YH, Lee SS, Yoo BH, Kim KM *et al.* The comparative study to evaluate the effect of palonosetron monotherapy versus palonosetron with dexamethasone combination therapy for prevention of postoperative nausea and vomiting. *Korean J Anaesthesiol.* 2012; 63(4):334-339.
272. Park SK, Cho EJ. A randomized, double-blind trial of palonosetron compared with ondansetron in preventing postoperative nausea and vomiting after gynaecological laparoscopic surgery. *J Int Med Res.* 2011; 39(2):399-407.
273. Patel RI, Davis PJ, Orr RJ, Ferrari LR, Rimar S, Hannallah RS *et al.* Single-dose ondansetron prevents postoperative vomiting in pediatric outpatients. *Anesth Analg.* 1997; 85(3):538-545.
274. Paventi S, Santevecchi A, Ranieri R. Efficacy of a single-dose ondansetron for preventing post-operative nausea and vomiting after laparoscopic cholecystectomy with sevoflurane and remifentanyl infusion anaesthesia. *Eur Rev Med Pharmacol Sci.* 2001; 5(2):59-63.
275. Akin A, Esmaoglu A, Gunes I, Boyaci A. The effects of the prophylactic tropisetron-propofol combination on postoperative nausea and vomiting in patients undergoing thyroidectomy under desflurane anesthesia. *Mt Sinai J Med.* 2006; 73(2):560-563.
276. Blitz JD, Haile M, Kline R, Franco L, Didehvar S, Pachter HL *et al.* A randomized double blind study to evaluate efficacy of palonosetron with dexamethasone versus palonosetron alone for prevention of postoperative and postdischarge nausea and vomiting in subjects undergoing laparoscopic surgeries with high emetogenic risk. *Am J Ther.* 2012; 19(5):324-329.
277. Capouet V, De Pauw C, Vernet B, Ivens D, Derijcke V, Verschelen L *et al.* Single dose i.v. tropisetron in the prevention of postoperative nausea and vomiting after gynaecological surgery. *Br J Anaesth.* 1996; 76(1):54-60.
278. Chan MT, Chui PT, Ho WS, King WW. Single-dose tropisetron for preventing postoperative nausea and vomiting after breast surgery. *Anesth Analg.* 1998; 87(4):931-935.
279. De Witte JL, Schoenmaekers B, Sessler DI, Deloof T. The analgesic efficacy of tramadol is impaired by concurrent administration of ondansetron. *Anesth Analg.* 2001; 92(5):1319-1321.
280. Gurkan Y, Toker K. Prophylactic ondansetron reduces the incidence of intrathecal fentanyl-induced pruritus. *Anesth Analg.* 2002; 95(6):1763-1766, table of contents.
281. Habib AS, Reuveni J, Taguchi A, White WD, Gan TJ. A comparison of ondansetron with promethazine for treating postoperative nausea and vomiting in patients who received prophylaxis with ondansetron: a retrospective database analysis. *Anesth Analg.* 2007; 104(3):548-551.
282. Jokela R, Koivuranta M. Tropisetron or droperidol in the prevention of postoperative nausea and vomiting. A comparative, randomised, double-blind study in women undergoing laparoscopic cholecystectomy. *Acta Anaesthesiol Scand.* 1999; 43(6):645-650.
283. Kelsaka E, Baris S, Karakaya D, Sarihasan B. Comparison of ondansetron and meperidine for prevention of shivering in patients undergoing spinal anesthesia. *Reg Anesth Pain Med.* 2006; 31(1):40-45.
284. Korttila K, Clergue F, Leeseer J, Feiss P, Olthoff D, Payeur-Michel C *et al.* Intravenous dolasetron and ondansetron in prevention of postoperative nausea and vomiting: a multicenter, double-blind, placebo-controlled study. *Acta Anaesthesiol Scand.* 1997; 41(7):914-922.
285. Paxton D, Taylor RH, Gallagher TM, Crean PM. Postoperative emesis following otoplasty in children. *Anaesthesia.* 1995; 50(12):1083-1085.
286. Paxton LD, McKay AC, Mirakhur RK. Prevention of nausea and vomiting after day case gynaecological laparoscopy. A comparison of ondansetron, droperidol, metoclopramide and placebo. *Anaesthesia.* 1995; 50(5):403-406.
287. Peixoto AJ, Celich MF, Zardo L, Peixoto Filho AJ. Ondansetron or droperidol for prophylaxis of nausea and vomiting after intrathecal morphine. *Eur J Anaesthesiol.* 2006; 23(8):670-675.
288. Peixoto AJ, Peixoto Filho AJ, Leaes LF, Celich MF, Barros MA. Efficacy of prophylactic droperidol, ondansetron or both in the prevention of postoperative nausea and vomiting in major gynaecological surgery. A prospective, randomized, double-blind clinical trial. *Eur J Anaesthesiol.* 2000; 17(10):611-615.
289. Philip BK, Pearman MH, Kovac AL, Chelly JE, Wetchler BV, McKenzie R *et al.* Dolasetron for the prevention of postoperative nausea and vomiting following outpatient surgery with general anaesthesia: a randomized, placebo-controlled study. The Dolasetron PONV Prevention Study Group. *Eur J Anaesthesiol.* 2000; 17(1):23-32.



290. Piper SN, Rohm K, Boldt J, Kranke P, Maleck W, Seifert R *et al.* Postoperative nausea and vomiting after surgery for prognathism: not only a question of patients' comfort. A placebo-controlled comparison of dolasetron and droperidol. *Journal of Cranio-Maxillofacial Surgery.* 2008; 36(3):173-179.
291. Pirat A, Tuncay SF, Torgay A, Candan S, Arslan G. Ondansetron, orally disintegrating tablets versus intravenous injection for prevention of intrathecal morphine-induced nausea, vomiting, and pruritus in young males. *Anesth Analg.* 2005; 101(5):1330-1336.
292. Pitkanen MT, Numminen MK, Tuominen MK, Rosenberg PH. Comparison of metoclopramide and ondansetron for the prevention of nausea and vomiting after intrathecal morphine. *Eur J Anaesthesiol.* 1997; 14(2):172-177.
293. Piwko C, Lasry A, Alanezi K, Coyte PC, Ungar WJ. Economic evaluation of ondansetron vs dimenhydrinate for prevention of postoperative vomiting in children undergoing strabismus surgery. *Paediatr Anaesth.* 2005; 15(9):755-761.
294. Polati E, Verlato G, Finco G, Mosaner W, Grosso S, Gottin L *et al.* Ondansetron versus metoclopramide in the treatment of postoperative nausea and vomiting. *Anesth Analg.* 1997; 85(2):395-399.
295. Principi F, Di AP, Sofra M, Salerno S, Aloe L. Intravenous ondansetron in the prophylactic treatment of postoperative nausea and vomiting in gynaecological surgery. *Acta Anaesthesiologica Italica.* 1996; 47(2):147-156.
296. Pueyo FJ, Carrascosa F, Lopez L, Iribarren MJ, Garcia-Pedrajas F, Saez A. Combination of ondansetron and droperidol in the prophylaxis of postoperative nausea and vomiting. *Anesth Analg.* 1996; 83(1):117-122.
297. Pugh SC, Jones NC, Barsoum LZ. A comparison of prophylactic ondansetron and metoclopramide administration in patients undergoing major neurosurgical procedures. *Anaesthesia.* 1996; 51(12):1162-1164.
298. Purhonen S, Koski EM, Niskanen M, Hynynen M. Efficacy and costs of 3 anesthetic regimens in the prevention of postoperative nausea and vomiting. *J Clin Anesth.* 2006; 18(1):41-45.
299. Purhonen S, Niskanen M, Wustefeld M, Hirvonen E, Hynynen M. Supplemental 80% oxygen does not attenuate post-operative nausea and vomiting after breast surgery. *Acta Anaesthesiol Scand.* 2006; 50(1):26-31.
300. Quaynor H, Raeder JC. Incidence and severity of postoperative nausea and vomiting are similar after metoclopramide 20 mg and ondansetron 8 mg given by the end of laparoscopic cholecystectomies. *Acta Anaesthesiol Scand.* 2002; 46(1):109-113.
301. Rabbani MZ, Khan MN, Qureshi R, Zubair M, Pervez MB. Does the added benefit of ondansetron over dexamethasone, to control post-operative nausea and vomiting, justify the added cost in patients undergoing tonsillectomy and adenotonsillectomy? *J Pak Med Assoc.* 2010; 60(7):559-561.
302. Rajeeva V, Bhardwaj N, Batra YK, Dhaliwal LK. Comparison of ondansetron with ondansetron and dexamethasone in prevention of PONV in diagnostic laparoscopy. *Canadian Journal of Anesthesia.* 1999; 46(1):40-44.
303. Raphael JH, Norton AC. Antiemetic efficacy of prophylactic ondansetron in laparoscopic surgery: randomized, double-blind comparison with metoclopramide. *Br J Anaesth.* 1993; 71(6):845-848.
304. Rauters NI, Stuber F, Lee EH, Musshoff F, Fimmers R, Barann M *et al.* Antagonistic effects of ondansetron and tramadol? A randomized placebo and active drug controlled study. *J Pain.* 2010; 11(12):1274-1281.
305. Reihner E, Grunditz R, Giesecke K, Gustafsson LL. Postoperative nausea and vomiting after breast surgery: efficacy of prophylactic ondansetron and droperidol in a randomized placebo-controlled study. *Eur J Anaesthesiol.* 2000; 17(3):197-203.
306. Riad W, Marouf H. Combination therapy in the prevention of PONV after strabismus surgery in children: granisetron, ondansetron, midazolam with dexamethasone. *Middle East J Anesthesiol.* 2009; 20(3):431-436.
307. Rodrigo C, Campbell R, Chow J, Tong A. The effect of a 4-mg preoperative intravenous dose of ondansetron in preventing nausea and vomiting after maxillofacial surgery. *J Oral Maxillofac Surg.* 1996; 54(10):1171-1175.
308. Rodrigo MR, Campbell RC, Chow J, Tong CK, Hui E, Lueveswanij S. Ondansetron for prevention of postoperative nausea and vomiting following minor oral surgery: a double-blind randomized study. *Anaesth Intensive Care.* 1994; 22(5):576-579.
309. Rose JB, Brenn BR, Corddry DH, Thomas PC. Preoperative oral ondansetron for pediatric tonsillectomy. *Anesth Analg.* 1996; 82(3):558-562.
310. Rose JB, Martin TM. Posttonsillectomy vomiting. Ondansetron or metoclopramide during paediatric tonsillectomy: are two doses better than one? *Paediatr Anaesth.* 1996; 6(1):39-44.
311. Rose JB, Martin TM, Corddry DH, Zagnoev M, Kettrick RG. Ondansetron reduces the incidence and severity of poststrabismus repair vomiting in children. *Anesth Analg.* 1994; 79(3):486-489.
312. Rosow CE, Haspel KL, Smith SE, Grecu L, Bittner EA. Haloperidol versus ondansetron for prophylaxis of postoperative nausea and vomiting. *Anesth Analg.* 2008; 106(5):1407-1409, table of contents.
313. Ruiz de Adana J, Tobalina Bonis R, Garcia Galan F, Hernandez Matias A, Fernandez Luengas D, Ortega Deballon P *et al.* Antiemetic efficacy of ondansetron in laparoscopic cholecystectomy. A randomized, double-blind, placebo-controlled study. *Rev Esp Enferm Dig.* 1999; 91(9):639-643.

314. Rung GW, Claybon L, Hord A, Patel C, Kallgren M, Koppel J *et al.* Intravenous ondansetron for postsurgical opioid-induced nausea and vomiting. S3A-255 Study Group. *Anesth Analg.* 1997; 84(4):832-838.
315. Rusch D, Arndt C, Martin H, Kranke P. The addition of dexamethasone to dolasetron or haloperidol for treatment of established postoperative nausea and vomiting. *Anaesthesia.* 2007; 62(8):810-817.
316. Ryu J, So YM, Hwang J, Do SH. Ramosetron versus ondansetron for the prevention of postoperative nausea and vomiting after laparoscopic cholecystectomy. *Surg Endosc.* 2010; 24(4):812-817.
317. Ryu JH, Jeon YT, Hwang JW, Oh AY, Moon JY, Ro YJ *et al.* Intravenous, oral, and the combination of intravenous and oral ramosetron for the prevention of nausea and vomiting after laparoscopic cholecystectomy: a randomized, double-blind, controlled trial. *Clin Ther.* 2011; 33(9):1162-1172.
318. Sadhasivam S, Saxena A, Kathirvel S, Kannan TR, Trikha A, Mohan V. The safety and efficacy of prophylactic ondansetron in patients undergoing modified radical mastectomy. *Anesth Analg.* 1999; 89(6):1340-1345.
319. Sadhasivam S, Shende D, Madan R. Prophylactic ondansetron in prevention of postoperative nausea and vomiting following pediatric strabismus surgery: a dose-response study. *Anesthesiology.* 2000; 92(4):1035-1042.
320. Sagir O, Gulhas N, Toprak H, Yucel A, Begeg Z, Ersoy O. Control of shivering during regional anaesthesia: prophylactic ketamine and granisetron. *Acta Anaesthesiol Scand.* 2007; 51(1):44-49.
321. Sahoo T, SenDasgupta C, Goswami A, Hazra A. Reduction in spinal-induced hypotension with ondansetron in parturients undergoing caesarean section: a double-blind randomised, placebo-controlled study. *Int J Obstet Anesth.* 2012; 21(1):24-28.
322. Said-Ahmed HAF. Does granisetron affect the analgesic efficacy of tramadol in patients undergoing abdominal hysterectomy? *Acta Anaesthesiologica Italica.* 2008; 59(3):256-266.
323. Sakellaris G, Georgogianaki P, Astyrakaki E, Michalakis M, Dede O, Alegakis A *et al.* Prevention of post-operative nausea and vomiting in children--a prospective randomized double-blind study. *Acta Paediatr.* 2008; 97(6):801-804.
324. Samarkandi AH, Riad W, Altaf R, Fatani R. Dexamethasone-ondansetron combination in prevention of nausea and vomiting after strabismus surgery in children. *Egyptian Journal of Anaesthesia.* 2004; 20(4):399-403.
325. Sanchez-Ledesma MJ, Lopez-Olaondo L, Pueyo FJ, Carrascosa F, Ortega A. A comparison of three antiemetic combinations for the prevention of postoperative nausea and vomiting. *Anesth Analg.* 2002; 95(6):1590-1595, table of contents.
326. Sandhu HS, Stockall CA, Ganapathy S, Spadafora SM, Watson JT. Comparison of ondansetron, dimenhydrinate versus placebo as PONV prophylaxis for outpatient gynecological laparoscopy. *Ambulatory Surgery.* 1999; 7(4):187-191.
327. Sandhu T, Tanvatharaphan P, Cheunjongkolkul V. Ondansetron versus metoclopramide in prophylaxis of nausea and vomiting for laparoscopic cholecystectomy: a prospective double-blind randomized study. *Asian J Surg.* 2008; 31(2):50-54.
328. Sarvela PJ, Halonen PM, Soikkeli AI, Kainu JP, Korttila KT. Ondansetron and tropisetron do not prevent intraspinal morphine- and fentanyl-induced pruritus in elective cesarean delivery. *Acta Anaesthesiol Scand.* 2006; 50(2):239-244.
329. Schnaider TB, Vieira AM, Brandao AC. Comparative study of anti-emetics and their association, in the prevention of postoperative nausea and vomiting in patients undergoing gynecologic surgeries. *Rev Bras Anesthesiol.* 2008; 58(6):614-622.
330. Scholz J, Hennes HJ, Steinfath M, Farber L, Schweiger C, Dick W *et al.* Tropisetron or ondansetron compared with placebo for prevention of postoperative nausea and vomiting. *Eur J Anaesthesiol.* 1998; 15(6):676-685.
331. Scuderi PE, James RL, Harris L, Mims GR, 3rd. Antiemetic prophylaxis does not improve outcomes after outpatient surgery when compared to symptomatic treatment. *Anesthesiology.* 1999; 90(2):360-371.
332. Scuderi PE, James RL, Harris L, Mims GR, 3rd. Multimodal antiemetic management prevents early postoperative vomiting after outpatient laparoscopy. *Anesth Analg.* 2000; 91(6):1408-1414.
333. Scuderi PE, Weaver RG, Jr., James RL, Mims G, Elliott WG, Weeks DB. A randomized, double-blind, placebo controlled comparison of droperidol, ondansetron, and metoclopramide for the prevention of vomiting following outpatient strabismus surgery in children. *J Clin Anesth.* 1997; 9(7):551-558.
334. Sennaraj B, Shende D, Sadhasivam S, Ilavajady S, Jagan D. Management of post-strabismus nausea and vomiting in children using ondansetron: a value-based comparison of outcomes. *Br J Anaesth.* 2002; 89(3):473-478.
335. Shakeel M, Trinidad A, Al-Adhami A, Khan I, Supriya M, Kubba H. Retrospective review of three antiemetic regimens versus no therapy in the prevention of postoperative and vomiting following adenotonsillar surgery. *J Otolaryngol Head Neck Surg.* 2012; 41(1):35-40.
336. Shakya S, Chaturvedi A, Sah BP. Prophylactic low dose ketamine and ondansetron for prevention of shivering during spinal anaesthesia. *J Anaesthesiol Clin Pharmacol.* 2010; 26(4):465-469.

337. Sharma S, Abdullah N. A comparison of commonly used anti-emetics for the prevention of emetic sequelae after a major gynaecological surgery. *Singapore Med J.* 2000; 41(4):147-150.
338. Sharma S, Goswami U. Evaluation of acupuncture for anti-emetic prophylaxis. *Journal of Anaesthesiology Clinical Pharmacology.* 2007; 23(4):401-404.
339. Shende D, Bharti N, Kathirvel S, Madan R. Combination of droperidol and ondansetron reduces PONV after pediatric strabismus surgery more than single drug therapy. *Acta Anaesthesiol Scand.* 2001; 45(6):756-760.
340. Shende D, Mandal NG. Efficacy of ondansetron and metoclopramide for preventing postoperative emesis following strabismus surgery in children. *Anaesthesia.* 1997; 52(5):496-500.
341. Singh DK, Jindal P, Singh G. Comparative study of attenuation of the pain caused by propofol intravenous injection, by granisetron, magnesium sulfate and nitroglycerine. *Saudi J Anaesth.* 2011; 5(1):50-54.
342. Singla NK, Singla SK, Chung F, Kutsogiannis DJ, Blackburn L, Lane SR *et al.* Phase II study to evaluate the safety and efficacy of the oral neurokinin-1 receptor antagonist casopitant (GW679769) administered with ondansetron for the prevention of postoperative and postdischarge nausea and vomiting in high-risk patients. *Anesthesiology.* 2010; 113(1):74-82.
343. Sinha PK, Ambesh SP. Ondansetron in prophylaxis of postoperative nausea and vomiting in patients undergoing breast surgery: a placebo-controlled double blind study. *J Indian Med Assoc.* 2004; 102(2):73-74, 76, 78-79.
344. Sinha PK, Tripathi M, Ambesh SP. Efficacy of ondansetron in prophylaxis of postoperative nausea and vomiting in patients following infratentorial surgery: a placebo-controlled prospective double-blind study. *J Neurosurg Anesthesiol.* 1999; 11(1):6-10.
345. Sniadach MS, Alberts MS. A comparison of the prophylactic antiemetic effect of ondansetron and droperidol on patients undergoing gynecologic laparoscopy. *Anesth Analg.* 1997; 85(4):797-800.
346. So JB, Cheong KF, Sng C, Cheah WK, Goh P. Ondansetron in the prevention of postoperative nausea and vomiting after laparoscopic cholecystectomy: a prospective randomized study. *Surg Endosc.* 2002; 16(2):286-288.
347. Sodhi K, B.K. M, Sodhi GS, Kumar M. A comparative Study of Granisetron, Dexamethasone, and Granisetron Plus Dexamethasone as Prophylactic Antiemetic Therapy in Female Patients Undergoing Breast Surgery. *Journal of Anaesthesiology Clinical Pharmacology.* 2007; 23(4):373-378.
348. Somri M, Vaida SJ, Sabo E, Yassain G, Gankin I, Gaitini LA. Acupuncture versus ondansetron in the prevention of postoperative vomiting. A study of children undergoing dental surgery. *Anaesthesia.* 2001; 56(10):927-932.
349. Song F, Altman DG, Glenny A-M, Deeks JJ. Validity of indirect comparison for estimating efficacy of competing interventions: empirical evidence from published meta-analyses. 2003; 326(7387):472.
350. Splinter WM. Prevention of vomiting after strabismus surgery in children: dexamethasone alone versus dexamethasone plus low-dose ondansetron. *Paediatr Anaesth.* 2001; 11(5):591-595.
351. Splinter WM, Baxter MR, Gould HM, Hall LE, MacNeill HB, Roberts DJ *et al.* Oral ondansetron decreases vomiting after tonsillectomy in children. *Can J Anaesth.* 1995; 42(4):277-280.
352. Splinter WM, Rhine EJ. Prophylactic antiemetics in children undergoing tonsillectomy: high-dose vs low-dose ondansetron. *Paediatr Anaesth.* 1997; 7(2):125-129; discussion 130.
353. Splinter WM, Rhine EJ. Low-dose ondansetron with dexamethasone more effectively decreases vomiting after strabismus surgery in children than does high-dose ondansetron. *Anesthesiology.* 1998; 88(1):72-75.
354. Splinter WM, Rhine EJ. Prophylaxis for vomiting by children after tonsillectomy: ondansetron compared with perphenazine. *Br J Anaesth.* 1998; 80(2):155-158.
355. Splinter WM, Rhine EJ, Roberts DW, Baxter MR, Gould HM, Hall LE *et al.* Ondansetron is a better prophylactic antiemetic than droperidol for tonsillectomy in children. *Can J Anaesth.* 1995; 42(10):848-851.
356. Sriraman R, Indu S, Chari P. Is granisetron-dexamethasone combination better than ondansetron-dexamethasone in the prevention of postoperative nausea and vomiting in outpatient gynaecological laparoscopy. *Journal of Anaesthesiology Clinical Pharmacology.* 2007; 23(4):365-372.
357. Stamer UM, Lee EH, Rauters NI, Zhang L, Kleine-Brueggene M, Fimmers R *et al.* CYP2D6- and CYP3A-dependent enantioselective plasma concentrations of ondansetron in postanesthesia care. *Anesth Analg.* 2011; 113(1):48-54.
358. Stene FN, Seay RE, Young LA, Bohnsack LE, Bostrom BC. Prospective, randomized, double-blind, placebo-controlled comparison of metoclopramide and ondansetron for prevention of posttonsillectomy or adenotonsillectomy emesis. *J Clin Anesth.* 1996; 8(7):540-544.
359. Stienstra R, Samhan YM, el-Mofty M, de Bont LE, Bovill JG. Double-blind comparison of alizapride, droperidol and ondansetron in the treatment of post-operative nausea. *Eur J Anaesthesiol.* 1997; 14(3):290-294.
360. Subramaniam B, Madan R, Sadhasivam S, Sennaraj B, Tamilselvan P, Rajeshwari S *et al.* Dexamethasone is a cost-effective alternative to ondansetron in preventing PONV after paediatric strabismus repair. *Br J Anaesth.* 2001; 86(1):84-89.

361. Subramaniam K, Pandia MP, Dash M, Dash HH, Bithal PK, Bhatia A *et al.* Scheduled prophylactic ondansetron administration did not improve its antiemetic efficacy after intracranial tumour resection surgery in children. *Eur J Anaesthesiol.* 2007; 24(7):615-619.
362. Suen TK, Gin TA, Chen PP, Rowbottom YM, Critchley LA, Ray AK. Ondansetron 4 mg for the prevention of nausea and vomiting after minor laparoscopic gynaecological surgery. *Anaesth Intensive Care.* 1994; 22(2):142-146.
363. Sukhani R, Pappas AL, Lurie J, Hotaling AJ, Park A, Fluder E. Ondansetron and dolasetron provide equivalent postoperative vomiting control after ambulatory tonsillectomy in dexamethasone-pretreated children. *Anesth Analg.* 2002; 95(5):1230-1235, table of contents.
364. Sun R, Klein KW, White PF. The effect of timing of ondansetron administration in outpatients undergoing otolaryngologic surgery. *Anesth Analg.* 1997; 84(2):331-336.
365. Sung YF, Wetchler BV, Duncalf D, Joslyn AF. A double-blind, placebo-controlled pilot study examining the effectiveness of intravenous ondansetron in the prevention of postoperative nausea and emesis. *J Clin Anesth.* 1993; 5(1):22-29.
366. Swiatkowski J, Goral A, Dzieciuch JA, Przesmycki K. Assessment of ondansetron and droperidol for the prevention of post-operative nausea and vomiting after cholecystectomy and minor gynaecological surgery performed by laparoscopy. *Eur J Anaesthesiol.* 1999; 16(11):766-772.
367. Szarvas S, Chellapuri RS, Harmon DC, Owens J, Murphy D, Shorten GD. A comparison of dexamethasone, ondansetron, and dexamethasone plus ondansetron as prophylactic antiemetic and antipruritic therapy in patients receiving intrathecal morphine for major orthopedic surgery. *Anesth Analg.* 2003; 97(1):259-263, table of contents.
368. Talesh KT, Motamedi MH, Kahnamousi S. Comparison of ondansetron and metoclopramide antiemetic prophylaxis in maxillofacial surgery patients. *Oral Surg Oral Med Oral Pathol Oral Radiol Endod.* 2011; 111(3):275-277.
369. Tan T, Ojo R, Immani S, Choroszczak P, Carey M. Reduction of severity of pruritus after elective caesarean section under spinal anaesthesia with subarachnoid morphine: a randomised comparison of prophylactic granisetron and ondansetron. *Int J Obstet Anesth.* 2010; 19(1):56-60.
370. Tang J, Chen X, White PF, Wender RH, Ma H, Sloninsky A *et al.* Antiemetic prophylaxis for office-based surgery: are the 5-HT<sub>3</sub> receptor antagonists beneficial? *Anesthesiology.* 2003; 98(2):293-298.
371. Tang J, D'Angelo R, White PF, Scuderi PE. The efficacy of RS-25259, a long-acting selective 5-HT<sub>3</sub> receptor antagonist, for preventing postoperative nausea and vomiting after hysterectomy procedures. *Anesth Analg.* 1998; 87(2):462-467.
372. Tang J, Wang B, White PF, Watcha MF, Qi J, Wender RH. The effect of timing of ondansetron administration on its efficacy, cost-effectiveness, and cost-benefit as a prophylactic antiemetic in the ambulatory setting. *Anesth Analg.* 1998; 86(2):274-282.
373. Tang J, Watcha MF, White PF. A comparison of costs and efficacy of ondansetron and droperidol as prophylactic antiemetic therapy for elective outpatient gynecologic procedures. *Anesth Analg.* 1996; 83(2):304-313.
374. Taylor AM, Rosen M, Diemunsch PA, Thorin D, Houweling PL. A double-blind, parallel-group, placebo-controlled, dose-ranging, multicenter study of intravenous granisetron in the treatment of postoperative nausea and vomiting in patients undergoing surgery with general anesthesia. *J Clin Anesth.* 1997; 9(8):658-663.
375. Teran L, Hawkins JK. The effectiveness of inhalation isopropyl alcohol vs. granisetron for the prevention of postoperative nausea and vomiting. *AANA J.* 2007; 75(6):417-422.
376. Thagaard KS, Steine S, Raeder J. Ondansetron disintegrating tablets of 8 mg twice a day for 3 days did not reduce the incidence of nausea or vomiting after laparoscopic surgery. *Eur J Anaesthesiol.* 2003; 20(2):153-157.
377. Thomas R, Jones N. Prospective randomized, double-blind comparative study of dexamethasone, ondansetron, and ondansetron plus dexamethasone as prophylactic antiemetic therapy in patients undergoing day-case gynaecological surgery. *Br J Anaesth.* 2001; 87(4):588-592.
378. Tramer MR, Sansonetti A, Fuchs-Buder T, Rifat K. Oculocardiac reflex and postoperative vomiting in paediatric strabismus surgery. A randomised controlled trial comparing four anaesthetic techniques. *Acta Anaesthesiol Scand.* 1998; 42(1):117-123.
379. Treschan TA, Zimmer C, Nass C, Stegen B, Esser J, Peters J. Inspired oxygen fraction of 0.8 does not attenuate postoperative nausea and vomiting after strabismus surgery. *Anesthesiology.* 2005; 103(1):6-10.
380. Tseng LH, Liou SC, Chang TC, Tsai SC, Soong YK, Wong SY. A randomized blinded study of the incidence of postoperative nausea and vomiting in women after major gynecologic laparoscopic surgery. *J Minim Invasive Gynecol.* 2006; 13(5):413-417.
381. Tsui SL, Ng KF, Wong LC, Tang GW, Pun TC, Yang JC. Prevention of postoperative nausea and vomiting in gynaecological laparotomies: a comparison of tropisetron and ondansetron. *Anaesth Intensive Care.* 1999; 27(5):471-476.

382. Turhanoglu S, Ozyilmaz MA, Tok D, Olmez G, Cinar FS, Bayhan N. A comparison of the effects of ondansetron with or without dimenhydrinate in the prevention of nausea and vomiting after major gynaecological surgery. *Acta Anaesthesiologica Italica*. 1999; 50(3):193-199.
383. Tzeng JI, Chu KS, Ho ST, Cheng KI, Liu KS, Wang JJ. Prophylactic iv ondansetron reduces nausea, vomiting and pruritus following epidural morphine for postoperative pain control. *Can J Anaesth*. 2003; 50(10):1023-1026.
384. Ulusoy HO, Akturk G, Luleci N, Kalac N, Albayrak D. Prophylactic administration of ondansetron in emergency intraabdominal operations. *Middle East J Anesthesiol*. 1997; 14(1):45-58.
385. Ummenhofer W, Frei FJ, Urwyler A, Kern C, Drewe J. Effects of ondansetron in the prevention of postoperative nausea and vomiting in children. *Anesthesiology*. 1994; 81(4):804-810.
386. Usha RP, Rama RG, Naidu MU, Jagga RP, Ramesh KT, Shobha JC *et al*. Randomised, double blind, placebo controlled study of Ondansetron in female patients undergoing day case surgery. *Journal of Anaesthesiology Clinical Pharmacology*. 1996; 12(1):31-34.
387. Usmani H, Quadir A, Siddiqui RA, Sharma SC. Ondansetron and dexamethasone in middle ear procedures. *Indian J Otolaryngol Head Neck Surg*. 2003; 55(2):97-99.
388. Vale C, Oliveira F, Assuncao J, Fontes-Ribeiro C, Pereira F. Co-administration of ondansetron decreases the analgesic efficacy of tramadol in humans. *Pharmacology*. 2011; 88(3-4):182-187.
389. Veneziani A, Dominaci M, Labardi M, Luca Noto GA, Marini F. Prevention of postoperative nausea and vomiting (PONV) in major gynecological surgery: Comparison of therapeutic regimens. *Acta Anaesthesiologica Italica*. 2006; 57(3-Feb):185-197.
390. Volpe N, Gesini A, Collini S, Grassano MT, Guzzon D, Marino MR *et al*. Single dose ondansetron for prevention of postoperative nausea and vomiting. Results from the Italian Multicentre Ondansetron Study. *DRUG INVEST*. 1994; 8(2):67-72.
391. Wagley C, Hackett C, Haug RH. Single dose ondansetron for prevention of postoperative nausea and vomiting. Results from the Italian Multicentre Ondansetron Study. *J Oral Maxillofac Surg*. 1999; 57(10):1195-1200.
392. Wagner D, Pandit U, Voepel-Lewis T, Weber M. Dolasetron for the prevention of postoperative vomiting in children undergoing strabismus surgery. *Paediatr Anaesth*. 2003; 13(6):522-526.
393. Wagner DS, Gauger V, Chiravuri D, Faust K. Ondansetron oral disintegrating tablets for the prevention of postoperative vomiting in children undergoing strabismus surgery. *Ther Clin Risk Manag*. 2007; 3(4):691-694.
394. Walker JB. Efficacy of single-dose intravenous dolasetron versus ondansetron in the prevention of postoperative nausea and vomiting. *Clin Ther*. 2001; 23(6):932-938.
395. Wang PK, Tsay PJ, Huang CC, Lai HY, Lin PC, Huang SJ *et al*. Comparison of dexamethasone with ondansetron or haloperidol for prevention of patient-controlled analgesia-related postoperative nausea and vomiting: a randomized clinical trial. *World J Surg*. 2012; 36(4):775-781.
396. Warriner CB, Knox D, Belo S, Cole C, Finegan BA, Perreault L. Prophylactic oral dolasetron mesylate reduces nausea and vomiting after abdominal hysterectomy. The Canadian Dolasetron Study Group. *Can J Anaesth*. 1997; 44(11):1167-1173.
397. Watcha MF, Bras PJ, Cieslak GD, Pennant JH. The dose-response relationship of ondansetron in preventing postoperative emesis in pediatric patients undergoing ambulatory surgery. *Anesthesiology*. 1995; 82(1):47-52.
398. Watts SA. A randomized double-blinded comparison of metoclopramide, ondansetron and cyclizine in day-case laparoscopy. *Anaesth Intensive Care*. 1996; 24(5):546-551.
399. Wattwil M, Thorn SE, Lovqvist A, Wattwil L, Gupta A, Liljegren G. Dexamethasone is as effective as ondansetron for the prevention of postoperative nausea and vomiting following breast surgery. *Acta Anaesthesiol Scand*. 2003; 47(7):823-827.
400. White LA, Vanarase M, Brockbank K, Barrett RF. Patient-controlled analgesia and postoperative nausea and vomiting: efficacy of a continuous infusion of ondansetron. *Anaesthesia*. 2001; 56(4):365-369.
401. White PF, Issioui T, Hu J, Jones SB, Coleman JE, Waddle JP *et al*. Comparative efficacy of acustimulation (ReliefBand) versus ondansetron (Zofran) in combination with droperidol for preventing nausea and vomiting. *Anesthesiology*. 2002; 97(5):1075-1081.
402. White PF, Tang J, Hamza MA, Ogunnaike B, Lo M, Wender RH *et al*. The use of oral granisetron versus intravenous ondansetron for antiemetic prophylaxis in patients undergoing laparoscopic surgery: the effect on emetic symptoms and quality of recovery. *Anesth Analg*. 2006; 102(5):1387-1393.
403. White PF, Tang J, Song D, Coleman JE, Wender RH, Ogunnaike B *et al*. Transdermal scopolamine: an alternative to ondansetron and droperidol for the prevention of postoperative and postdischarge emetic symptoms. *Anesth Analg*. 2007; 104(1):92-96.
404. Wig J, Chandrashekhara KN, Yaddanapudi LN, Nakra D, Mukherjee KK. Effect of prophylactic ondansetron on postoperative nausea and vomiting in patients on preoperative steroids undergoing craniotomy for supratentorial tumors. *J Neurosurg Anesthesiol*. 2007; 19(4):239-242.
405. Wilson AJ, Diemunsch P, Lindeque BG, Scheinin H, Helbo-Hansen HS, Kroeks MV *et al*. Single-dose i.v. granisetron in the prevention of postoperative nausea and vomiting. *Br J Anaesth*. 1996; 76(4):515-518.

406. Wilson EB, Bass CS, Abrameit W, Roberson R, Smith RW. Metoclopramide versus ondansetron in prophylaxis of nausea and vomiting for laparoscopic cholecystectomy. *Am J Surg.* 2001; 181(2):138-141.
407. Woodward DK, Sherry KM, Harrison D. Antiemetic prophylaxis in cardiac surgery: comparison of metoclopramide and ondansetron. *Br J Anaesth.* 1999; 83(6):933-935.
408. Wrench IJ, Ward JE, Walder AD, Hobbs GJ. The prevention of postoperative nausea and vomiting using a combination of ondansetron and droperidol. *Anaesthesia.* 1996; 51(8):776-778.
409. Wu O, Belo SE, Koutsoukos G. Additive anti-emetic efficacy of prophylactic ondansetron with droperidol in out-patient gynecological laparoscopy. *Can J Anaesth.* 2000; 47(6):529-536.
410. Yazigi A, Chalhoub V, Madi-Jebara S, Haddad F, Hayek G. Prophylactic ondansetron is effective in the treatment of nausea and vomiting but not on pruritus after cesarean delivery with intrathecal sufentanil-morphine. *J Clin Anesth.* 2002; 14(3):183-186.
411. Yilmazlar A, Tokat O, Kutlay O, Yilmazlar T, Turker G. Comparison of the efficacy of 2 mg versus 5 mg tropisetron in the management of post-operative nausea and vomiting. *J Int Med Res.* 2001; 29(5):385-388.
412. Yuksek MS, Alici HA, Erdem AF, Cesur M. Comparison of prophylactic anti-emetic effects of ondansetron and dexamethasone in women undergoing day-case gynaecological laparoscopic surgery. *J Int Med Res.* 2003; 31(6):481-488.
413. Yun MJ, Kim YH, Kim AR. Comparison of azasetron and ondansetron for preventing postoperative nausea and vomiting in patients undergoing gynecological laparoscopic surgery. *Yonsei Med J.* 2010; 51(1):88-92.
414. Zarate E, Watcha MF, White PF, Klein KW, Sa Rego M, Stewart DG. A comparison of the costs and efficacy of ondansetron versus dolasetron for antiemetic prophylaxis. *Anesth Analg.* 2000; 90(6):1352-1358.
415. Zomers PJW, Langenberg CJM, Bruijn KMD. Tropisetron for Postoperative Nausea and Vomiting in Patients after Gynaecological Surgery. *Br J Anaesth.* 1993; 71(5):677-680.
416. Akcabay M, Gunaydin B, Mahli A, Karadenizli Y. Ondansetron versus placebo to prevent postoperative nausea and vomiting in patients undergoing thyroidectomy. *Gazi Medical Journal.* 1997; 8:54-57.
417. Ali-Melkkila T, Kanto J, Katevuo R. Tropisetron and metoclopramide in the prevention of postoperative nausea and vomiting. A comparative, placebo controlled study in patients undergoing ophthalmic surgery. *Anaesthesia.* 1996; 51(3):232-235.
418. Alon E, Buchser E, Herrera E, Christiaens F, De Pauw C, Ritter L *et al.* Tropisetron for treating established postoperative nausea and vomiting: a randomized, double-blind, placebo-controlled study. *Anesth Analg.* 1998; 86(3):617-623.
419. Ang C, Habre W, Sims C. Tropisetron reduces vomiting after tonsillectomy in children. *Br J Anaesth.* 1998; 80(6):761-763.
420. Asl ME, Isazadefar K, Mohammadian A, Khoshbaten M. Ondansetron and meperidine prevent postoperative shivering after general anesthesia. *Middle East J Anesthesiol.* 2011; 21(1):67-70.
421. Jensen AB, Christiansen DB, Coulthard K, Wilkins A, Roberts G, Walt JH *et al.* Tropisetron reduces postoperative vomiting in children undergoing tonsillectomy. *Paediatr Anaesth.* 2000; 10(1):69-75.
422. Madenoglu H, Yildiz K, Dogru K, Kurtsoy A, Guler G, Boyaci A. Randomized, double-blinded comparison of tropisetron and placebo for prevention of postoperative nausea and vomiting after supratentorial craniotomy. *J Neurosurg Anesthesiol.* 2003; 15(2):82-86.
423. Mitra D, Ray M, Dutta S, Gupta P, Sarkar A. Efficacy of Ondansetron and Dexamethasone in the Prevention of Postoperative Nausea and Vomiting after Caesarean Section. *Journal of Anaesthesiology Clinical Pharmacology.* 14(4):359-362.
424. Pan AK, Rudra A. Prophylactic single dose intravenous administration of ondansetron in the prevention of postoperative emetic symptoms during spinal anaesthesia for caesarean delivery. *Indian Journal of Anaesthesia.* 2003; 2003(47):3.
425. Purhonen S, Kauko M, Koski EM, Nuutinen L. Comparison of tropisetron, droperidol, and saline in the prevention of postoperative nausea and vomiting after gynecologic surgery. *Anesth Analg.* 1997; 84(3):662-667.
426. Sajedi P, Yaraghi A, Moseli HA. Efficacy of granisetron in preventing postanesthetic shivering. *Acta Anaesthesiol Taiwan.* 2008; 46(4):166-170.
427. Sarkar M, Sarkar A, Dewoolkar L, Charan S. Comparative Study of single dose intravenous ondansetron and metoclopramide as a premedication for prevention of postoperative nausea and vomiting in obstetrical laparoscopic surgery under general anaesthesia. *The Internet Journal of Anesthesiology.* 2007; 13(2).
428. Siddik-Sayyid SM, Aouad MT, Taha SK, Azar MS, Hakki MA, Kaddoum RN *et al.* Does ondansetron or granisetron prevent subarachnoid morphine-induced pruritus after cesarean delivery? *Anesth Analg.* 2007; 104(2):421-424.
429. Tosun Z, Akin A, Dogan H, Boyaci A. A randomized, placebo-controlled trial of a single dose of tropisetron for the prevention of vomiting after strabismus surgery in children. *Mt Sinai J Med.* 2006; 73(8):1106-1111.
430. Wang JJ, Ho ST, Uen YH, Lin MT, Chen KT, Huang JC *et al.* Small-dose dexamethasone reduces nausea and vomiting after laparoscopic cholecystectomy: a comparison of tropisetron with saline. *Anesth Analg.* 2002; 95(1):229-232, table of contents.

431. Wang JJ, Tzeng JI, Ho ST, Chen JY, Chu CC, So EC. The prophylactic effect of tropisetron on epidural morphine-related nausea and vomiting: a comparison of dexamethasone with saline. *Anesth Analg*. 2002; 94(3):749-753; table of contents.
432. Wang JJ, Wang PC, Liu YH, Chien CC. Low-dose dexamethasone reduces nausea and vomiting after tympanomastoid surgery: a comparison of tropisetron with saline. *Am J Otolaryngol*. 2002; 23(5):267-271.
433. Yilmazlar A, Yilmazlar T, Gurpinar E, Korun N, Kutlay O. Anti-emetic efficacy of tropisetron and metoclopramide. *J Int Med Res*. 1996; 24(3):266-270.
434. Cieslak GD, Watcha MF, Phillips MB, Pennant JH. The dose-response relation and cost-effectiveness of granisetron for the prophylaxis of pediatric postoperative emesis. *Anesthesiology*. 1996; 85(5):1076-1085.
435. Holt R, Rask P, Coulthard KP, Sinclair M, Roberts G, Van Der Walt J *et al*. Tropisetron plus dexamethasone is more effective than tropisetron alone for the prevention of postoperative nausea and vomiting in children undergoing tonsillectomy. *Paediatr Anaesth*. 2000; 10(2):181-188.
436. Panda NB, Bharadwaj N, Kapoor P, Chari P, Panda NK. Prevention of nausea and vomiting after middle ear surgery: combination of ondansetron and dexamethasone is the right choice. *J Otolaryngol*. 2004; 33(2):88-92.
437. Wang S, Greco J, Joseph RA, Feuerman M, Malone B. Evaluation of Three 5-HT<sub>3</sub> Receptor Antagonists in the Prevention of Postoperative Nausea and Vomiting in Adults. *P&T*. 2005; 30(6):341-353.
438. Srivastava B, Gaur S, Sinha AK, Sayana A, Barshaliya B, Dutt HK. Antiemetic prophylaxis with Granisetron, Ondansetron and Metoclopramide in laparoscopic cholecystectomy: A Comparison. *JARBS*. 2012; 4(4):279-287.
439. Safae M, Safi S. Evaluation of Effect of Ondansetron on Nausea and Vomiting after Elective Cholecystectomy Surgery in Women Older than 40 Years. *Journal of Isfahan Medical School*. 2011; 29(149).
440. Apfel CC, Candiotti K, Gan TJ, Ahmed R, Cox D. Palonosetron or ondansetron for rescue treatment of PONV after failed prophylaxis with ondansetron. *Anesth Analg*. 2011; 112(5S):S16.
441. Samra SK, Williams, B., Ciarralo, C., Turner, C., & Smythe, P. . Lack of effect of droperidol, ondansetron, and dolasetron administration on PONV in a placebo controlled trial. *Anesthesiology*, 99, A305. 2003.
442. White PF, & Scuderi, P. E. Prevention of postoperative nausea and vomiting (PONV): A dose-ranging study involving palonosetron, a potent 5-HT<sub>3</sub> receptor antagonist. *Anesthesiology*, 103, A703. 2005.
443. Scuderi P, Wetchler B, Sung YF, Mingus M, DuPen S, Claybon L *et al*. Treatment of postoperative nausea and vomiting after outpatient surgery with the 5-HT<sub>3</sub> antagonist ondansetron. *Anesthesiology*. 1993; 78(1):15-20.
444. Ebrahim Soltani AR, Mohammadinasab H, Goudarzi M, Arbabi S, Mohammadinasab A, Mohammadinasab F *et al*. Comparing the efficacy of prophylactic p6 acupressure, ondansetron, metoclopramide and placebo in the prevention of vomiting and nausea after strabismus surgery. *Acta Med Iran*. 2011; 49(4):208-212.
445. Oztekin S, Ozzeybek D, Tasdogan A, Kilercik H, Kara HC. Comparison of the antiemetic efficacy of tropisetron and droperidol with patient-given tramadol. *J Int Med Res*. 2003; 31(4):267-271.
446. Gaynes B, Fiscella R, Larson B, Kiesling D. Intravenous ondansetron versus placebo for post-operative nausea and vomiting following cataract surgery. *American Academy of Optometry*. 1996; 170.
447. Gurha P, R.D. K, Sanjay RR. Prophylactic intravenous palonosetron, granisetron and ondansetron in the prevention of post operative nausea and vomiting in laparoscopic surgeries. In. Unpublished; 2012.
448. Dershwitz M, Rosow CE, Di Biase PM, Joslyn AF, Sanderson PE. Ondansetron is effective in decreasing postoperative nausea and vomiting. *Clin Pharmacol Ther*. 1992; 52(1):96-101.
449. Jokela RM, Cakmakkaya OS, Danzeisen O, Korttila KT, Kranke P, Malhotra A *et al*. Ondansetron has similar clinical efficacy against both nausea and vomiting. *Anaesthesia*. 2009; 64(2):147-151.
450. Pearman MH. Single dose intravenous ondansetron in the prevention of postoperative nausea and vomiting. *Anaesthesia*. 1994; 49 Suppl:11-15.

**Appendix 3. List of excluded studies from previous systematic reviews**

| <b>Study</b>         | <b>Tang,<br/>2012<br/>(NMA)</b> | <b>Carlisle,<br/>2006<br/>(Cochrane)</b> | <b>Rawlinson,<br/>2012</b> | <b>Reason for exclusion</b>      |
|----------------------|---------------------------------|------------------------------------------|----------------------------|----------------------------------|
| Levy, 2011           | NO                              | NO                                       | YES                        | No serotonin receptor antagonist |
| Feo, 2006            | NO                              | NO                                       | YES                        | No serotonin receptor antagonist |
| Zutshi, 2005         | NO                              | NO                                       | YES                        | No serotonin receptor antagonist |
| Fujii, 2004          | YES                             | NO                                       | NO                         | Retracted article                |
| Altunkaya, 2003      | NO                              | YES                                      | NO                         | No serotonin receptor antagonist |
| Batra, 2003          | NO                              | YES                                      | NO                         | No serotonin receptor antagonist |
| Bisgaard, 2003       | NO                              | YES                                      | NO                         | No serotonin receptor antagonist |
| Bouderka, 2003       | NO                              | YES                                      | NO                         | No serotonin receptor antagonist |
| Caron, 2003          | NO                              | YES                                      | NO                         | No relevant comparator           |
| Culebras, 2003       | NO                              | YES                                      | NO                         | No serotonin receptor antagonist |
| Eberhart, 2003       | NO                              | YES                                      | NO                         | No serotonin receptor antagonist |
| El Shobaki,<br>2003  | NO                              | YES                                      | NO                         | Could not obtain full text       |
| Elhakim, 2003        | NO                              | YES                                      | NO                         | No serotonin receptor antagonist |
| Fujii, 2003          | NO                              | YES                                      | NO                         | Retracted article                |
| Grottke, 2003        | NO                              | YES                                      | NO                         | No serotonin receptor antagonist |
| Gulhas, 2003         | NO                              | YES                                      | NO                         | No serotonin receptor antagonist |
| Günes, 2003          | NO                              | YES                                      | NO                         | Non-English [Turkish]            |
| Gurses, 2003         | NO                              | YES                                      | NO                         | No serotonin receptor antagonist |
| Halvorsen, 2003      | NO                              | YES                                      | NO                         | No serotonin receptor antagonist |
| Hanna, 2003          | NO                              | NO                                       | YES                        | No serotonin receptor antagonist |
| Ismail, 2003         | NO                              | YES                                      | NO                         | No serotonin receptor antagonist |
| Jellish, 2003        | NO                              | YES                                      | NO                         | No serotonin receptor antagonist |
| Joris, 2003          | NO                              | YES                                      | NO                         | No serotonin receptor antagonist |
| Karabayirh,<br>2003  | NO                              | YES                                      | NO                         | Non-English [Turkish]            |
| Kvalsvik, 2003       | NO                              | NO                                       | YES                        | No serotonin receptor antagonist |
| Latasch, 2003        | NO                              | YES                                      | NO                         | No serotonin receptor antagonist |
| Lee, 2003            | NO                              | YES                                      | NO                         | No serotonin receptor antagonist |
| McCartney,<br>2003   | NO                              | YES                                      | NO                         | No serotonin receptor antagonist |
| Memis, 2003          | NO                              | YES                                      | NO                         | No serotonin receptor antagonist |
| Nortcliffe, 2003     | NO                              | YES                                      | NO                         | No serotonin receptor antagonist |
| Ozcan, 2003          | NO                              | YES                                      | NO                         | No serotonin receptor antagonist |
| Piper, 2003          | NO                              | YES                                      | NO                         | Non-English [German]             |
| Pongroj paw,<br>2003 | NO                              | YES                                      | NO                         | No serotonin receptor antagonist |
| Purhonen, 2003       | NO                              | YES                                      | NO                         | No serotonin receptor antagonist |
| Quiroga, 2003        | NO                              | YES                                      | NO                         | No serotonin receptor antagonist |
| Rimaitis, 2003       | NO                              | NO                                       | YES                        | No serotonin receptor antagonist |
| Sahjpaul, 2003       | NO                              | YES                                      | NO                         | No serotonin receptor antagonist |
| Schultz, 2003        | NO                              | YES                                      | NO                         | No serotonin receptor antagonist |
| Shah, 2003           | NO                              | YES                                      | NO                         | No serotonin receptor antagonist |
| Sites, 2003          | NO                              | YES                                      | NO                         | No serotonin receptor antagonist |
| Turan, 2003          | NO                              | YES                                      | NO                         | No serotonin receptor antagonist |
| Yegin, 2003          | NO                              | YES                                      | NO                         | No serotonin receptor antagonist |
| Yelken, 2003         | NO                              | YES                                      | NO                         | Non-English [Turkish]            |
| Purhonen,<br>2003b   | NO                              | YES                                      | NO                         | No serotonin receptor antagonist |



|                      |     |     |     |                                  |
|----------------------|-----|-----|-----|----------------------------------|
| Abdulatif, 2002      | NO  | YES | NO  | No serotonin receptor antagonist |
| Abou Zeid, 2002      | NO  | YES | NO  | Retracted article                |
| Alexander, 2002      | NO  | NO  | YES | No serotonin receptor antagonist |
| Apfel, 2002          | NO  | YES | NO  | No serotonin receptor antagonist |
| Awad, 2002           | NO  | YES | NO  | No relevant comparator           |
| Barros-de, 2002      | NO  | YES | NO  | No serotonin receptor antagonist |
| Bock, 2002           | NO  | YES | NO  | No serotonin receptor antagonist |
| Bonhomme, 2002       | NO  | YES | NO  | No serotonin receptor antagonist |
| Carli, 2002          | NO  | NO  | YES | No serotonin receptor antagonist |
| Cook-Sather, 2002    | NO  | YES | NO  | No serotonin receptor antagonist |
| Cote, 2002           | NO  | YES | NO  | No serotonin receptor antagonist |
| Fillinger, 2002      | NO  | YES | NO  | No serotonin receptor antagonist |
| Fournier, 2002       | NO  | YES | NO  | No serotonin receptor antagonist |
| Fujii, 2002          | NO  | YES | NO  | Retracted article                |
| Fujii, 2002b         | NO  | YES | NO  | Retracted article                |
| Fujii, 2002c         | NO  | YES | NO  | Retracted article                |
| Fujii, 2002e         | NO  | YES | NO  | No serotonin receptor antagonist |
| Fujii, 2002f         | NO  | YES | NO  | Retracted article                |
| Ganem, 2002          | NO  | YES | NO  | No serotonin receptor antagonist |
| Giannoni, 2002       | NO  | YES | NO  | No serotonin receptor antagonist |
| Hammas, 2002         | NO  | YES | NO  | No serotonin receptor antagonist |
| Jeffs, 2002          | NO  | YES | NO  | No serotonin receptor antagonist |
| Kaya, 2002           | NO  | YES | NO  | No serotonin receptor antagonist |
| Lee, 2002            | NO  | YES | NO  | No serotonin receptor antagonist |
| Nakata, 2002         | NO  | YES | NO  | No serotonin receptor antagonist |
| Oddby-Muhrbeck, 2002 | NO  | YES | NO  | No serotonin receptor antagonist |
| Omais, 2002          | NO  | YES | NO  | No serotonin receptor antagonist |
| Oshima, 2002         | NO  | YES | NO  | No serotonin receptor antagonist |
| Pang, 2002           | NO  | YES | NO  | No serotonin receptor antagonist |
| Piper, 2002          | YES | YES | NO  | Retracted article                |
| Rusch, 2002          | NO  | YES | NO  | No serotonin receptor antagonist |
| Sanansilp, 2002      | NO  | YES | NO  | No serotonin receptor antagonist |
| Song, 2002           | NO  | YES | NO  | No serotonin receptor antagonist |
| Steinberg, 2002      | NO  | NO  | YES | No serotonin receptor antagonist |
| Tosun, 2002          | NO  | YES | NO  | Non-English [Turkish]            |
| Tuncer, 2002         | NO  | YES | NO  | No serotonin receptor antagonist |
| Tzeng, 2002          | NO  | YES | NO  | No serotonin receptor antagonist |
| Uerpairojkit, 2002   | NO  | YES | NO  | No serotonin receptor antagonist |
| Unlugenc, 2002       | NO  | YES | NO  | No serotonin receptor antagonist |
| Vimlati, 2002        | NO  | YES | NO  | Non-English [Hungarian]          |
| Wang, 2002b          | NO  | YES | NO  | No serotonin receptor antagonist |
| Wang, 2002d          | NO  | YES | NO  | Non-English [Mandarin]           |
| Wang, 2002f          | NO  | YES | NO  | Non-English [Mandarin]           |
| Wu, 2002             | NO  | YES | NO  | No serotonin receptor antagonist |
| Yin, 2002            | NO  | YES | NO  | No serotonin receptor antagonist |
| Akkaya, 2001         | NO  | YES | NO  | Non-English [Turkish]            |
| Aouad, 2001          | NO  | YES | NO  | No serotonin receptor antagonist |
| Carli, 2001          | NO  | NO  | YES | No serotonin receptor antagonist |
| Celik, 2001          | NO  | YES | NO  | Non-English [Turkish]            |

|                      |     |     |     |                                  |
|----------------------|-----|-----|-----|----------------------------------|
| Chen, 2001           | NO  | YES | NO  | No relevant comparator           |
| Chow, 2001           | NO  | NO  | YES | No serotonin receptor antagonist |
| Coloma, 2001         | NO  | YES | NO  | No serotonin receptor antagonist |
| Danner, 2001         | NO  | YES | NO  | Non-English [German]             |
| Eberhart, 2001       | NO  | YES | NO  | No serotonin receptor antagonist |
| Fazi, 2001           | NO  | YES | NO  | No serotonin receptor antagonist |
| Fonseca, 2001        | NO  | YES | NO  | No serotonin receptor antagonist |
| Fujii, 2001          | NO  | YES | NO  | No serotonin receptor antagonist |
| Fujii, 2001b         | NO  | YES | NO  | Retracted article                |
| Fujii, 2001c         | NO  | YES | NO  | Retracted article                |
| Fujii, 2001d         | NO  | YES | NO  | Retracted article                |
| Fujii, 2001e         | YES | YES | NO  | Retracted article                |
| Fujii, 2001f         | YES | YES | NO  | Retracted article                |
| Fujii, 2001g         | NO  | YES | NO  | Retracted article                |
| Gentili, 2001        | NO  | YES | NO  | No serotonin receptor antagonist |
| Handa, 2001          | NO  | YES | NO  | No serotonin receptor antagonist |
| Hechler, 2001        | NO  | YES | NO  | No serotonin receptor antagonist |
| Hildyard, 2001       | NO  | YES | NO  | No serotonin receptor antagonist |
| Ho, 2001             | NO  | YES | NO  | No serotonin receptor antagonist |
| Huang, 2001          | NO  | YES | NO  | No serotonin receptor antagonist |
| Lee, 2001            | NO  | YES | NO  | No serotonin receptor antagonist |
| Liu, 2001            | NO  | YES | NO  | No serotonin receptor antagonist |
| Lovstad, 2001        | NO  | YES | NO  | No serotonin receptor antagonist |
| Mimoz, 2001          | NO  | NO  | YES | No serotonin receptor antagonist |
| Papadimitriou, 2001  | NO  | YES | NO  | No relevant comparator           |
| Paulsen, 2001        | NO  | NO  | YES | No serotonin receptor antagonist |
| Piper, 2001          | YES | YES | NO  | Retracted article                |
| Ramirez, 2001        | NO  | YES | NO  | No serotonin receptor antagonist |
| Schulz-Stubner, 2001 | NO  | YES | NO  | No serotonin receptor antagonist |
| Siddik, 2001         | NO  | NO  | YES | No serotonin receptor antagonist |
| Tan, 2001            | NO  | YES | NO  | No serotonin receptor antagonist |
| Ting, 2001           | NO  | YES | NO  | No serotonin receptor antagonist |
| Visser, 2001         | NO  | NO  | YES | No serotonin receptor antagonist |
| Wang, 2001           | NO  | YES | NO  | No serotonin receptor antagonist |
| Zatman, 2001         | NO  | YES | NO  | No serotonin receptor antagonist |
| Aubrun, 2000         | NO  | NO  | YES | No serotonin receptor antagonist |
| Busoni, 2000         | NO  | YES | NO  | No serotonin receptor antagonist |
| Dillier, 2000        | NO  | YES | NO  | Non-English [German]             |
| Eberhart, 2000       | NO  | YES | NO  | No serotonin receptor antagonist |
| Eberhart, 2000b      | NO  | YES | NO  | No serotonin receptor antagonist |
| Frank, 2000          | NO  | YES | NO  | No serotonin receptor antagonist |
| Fujii, 2000          | NO  | YES | NO  | Retracted article                |
| Fujii, 2000b         | NO  | YES | NO  | Retracted article                |
| Fujii, 2000c         | NO  | YES | NO  | Retracted article                |
| Hagemann, 2000       | NO  | YES | NO  | No serotonin receptor antagonist |
| Kotake, 2000         | NO  | YES | NO  | No serotonin receptor antagonist |
| Madan, 2000          | NO  | YES | NO  | No relevant comparator           |
| Mann, 2000           | NO  | NO  | YES | No serotonin receptor antagonist |
| Mayson, 2000         | NO  | YES | NO  | No serotonin receptor antagonist |
| Nawasreh, 2000       | NO  | YES | NO  | No serotonin receptor antagonist |
| Palme, 2000          | NO  | YES | NO  | No serotonin receptor antagonist |

|                  |     |     |     |                                  |
|------------------|-----|-----|-----|----------------------------------|
| Pérez, 2000      | NO  | YES | NO  | Non-English [Spanish]            |
| Philip, 2000     | YES | NO  | NO  | Not a relevant study design      |
| Rao, 2000        | NO  | NO  | YES | No serotonin receptor antagonist |
| Schlager, 2000   | NO  | YES | NO  | No serotonin receptor antagonist |
| Tan, 2000        | NO  | YES | NO  | No serotonin receptor antagonist |
| Tzeng, 2000      | NO  | YES | NO  | No serotonin receptor antagonist |
| Tzeng, 2000b     | NO  | YES | NO  | No serotonin receptor antagonist |
| Wang, 2000       | NO  | YES | YES | No serotonin receptor antagonist |
| Wang, 2000b      | NO  | YES | NO  | No serotonin receptor antagonist |
| Wang, 2000c      | NO  | YES | NO  | No serotonin receptor antagonist |
| Welters, 2000    | NO  | YES | NO  | No serotonin receptor antagonist |
| Welters, 2000b   | NO  | YES | NO  | No serotonin receptor antagonist |
| Ascari, 1999     | NO  | YES | NO  | CA, >10 years                    |
| Badaoui, 1999    | NO  | YES | NO  | Non-English [French]             |
| Eberhart, 1999   | NO  | YES | NO  | No serotonin receptor antagonist |
| Eberhart, 1999b  | NO  | YES | NO  | No serotonin receptor antagonist |
| Eberhart, 1999c  | NO  | YES | NO  | No serotonin receptor antagonist |
| Eberhart, 1999d  | NO  | YES | NO  | Non-English [German]             |
| Eberhart, 1999e  | NO  | YES | NO  | No serotonin receptor antagonist |
| Fujii, 1999      | NO  | YES | NO  | Retracted article                |
| Fujii, 1999b     | NO  | YES | NO  | Retracted article                |
| Fujii, 1999c     | NO  | YES | NO  | Retracted article                |
| Fujii, 1999d     | NO  | YES | NO  | Retracted article                |
| Fujii, 1999e     | NO  | YES | NO  | Retracted article                |
| Fujii, 1999f     | NO  | YES | NO  | Retracted article                |
| Fujii, 1999g     | NO  | YES | NO  | Retracted article                |
| Fujii, 1999h     | NO  | YES | NO  | Retracted article                |
| Fujii, 1999i     | NO  | YES | NO  | Retracted article                |
| Fujii, 1999j     | NO  | YES | NO  | Retracted article                |
| Fujii, 1999k     | NO  | YES | NO  | Retracted article                |
| Fujii, 1999l     | NO  | YES | NO  | Retracted article                |
| Fujii, 1999m     | NO  | YES | NO  | Retracted article                |
| Fujii, 1999n     | NO  | YES | NO  | Retracted article                |
| Goyagi, 1999     | NO  | YES | NO  | No serotonin receptor antagonist |
| Greif, 1999      | NO  | YES | NO  | No serotonin receptor antagonist |
| Honkavaara, 1999 | NO  | YES | NO  | No serotonin receptor antagonist |
| Ilbeigi, 1999    | NO  | YES | NO  | CA, >10 years                    |
| Jakobsson, 1999  | NO  | YES | NO  | Not a relevant study design      |
| Kokinsky, 1999   | NO  | YES | NO  | No serotonin receptor antagonist |
| Kranke, 1999     | NO  | YES | NO  | No serotonin receptor antagonist |
| Lepouse, 1999    | NO  | YES | NO  | CA, >10 years                    |
| Liu, 1999        | NO  | YES | NO  | No serotonin receptor antagonist |
| Lim, 1999        | NO  | YES | NO  | No serotonin receptor antagonist |
| Morin, 1999      | NO  | YES | NO  | No serotonin receptor antagonist |
| Movinsky, 1999   | NO  | YES | NO  | No serotonin receptor antagonist |
| Parks, 1999      | NO  | YES | NO  | CA, >10 years                    |
| Rusch, 1999      | NO  | YES | NO  | Non-English [Italian]            |
| Triem, 1999      | NO  | YES | NO  | Non-English [German]             |
| Vosdoganis, 1999 | NO  | YES | NO  | No serotonin receptor antagonist |
| Wang, 1999       | NO  | YES | NO  | No serotonin receptor antagonist |
| Wang, 1999b      | NO  | YES | NO  | No serotonin receptor antagonist |
| Wang, 1999c      | NO  | YES | NO  | No serotonin receptor antagonist |

|                     |     |     |    |                                  |
|---------------------|-----|-----|----|----------------------------------|
| Williams, 1999      | NO  | YES | NO | No serotonin receptor antagonist |
| Kranke, 1999b       | NO  | YES | NO | CA, >10 years                    |
| Apfel, 1998         | NO  | YES | NO | No serotonin receptor antagonist |
| Badaoui, 1998       | NO  | YES | NO | Non-English [French]             |
| Biedler, 1998       | NO  | YES | NO | Non-English [German]             |
| Bilgin, 1998        | NO  | YES | NO | Non-English [Turkish]            |
| Chung, 1998         | NO  | YES | NO | No serotonin receptor antagonist |
| Fortney, 1998       | NO  | YES | NO | Not a relevant study design      |
| Fujii, 1998         | NO  | YES | NO | Retracted article                |
| Fujii, 1998b        | NO  | YES | NO | Retracted article                |
| Fujii, 1998c        | NO  | YES | NO | Retracted article                |
| Fujii, 1998d        | NO  | YES | NO | Retracted article                |
| Fujii, 1998e        | NO  | YES | NO | Retracted article                |
| Fujii, 1998f        | NO  | YES | NO | Retracted article                |
| Fujii, 1998g        | NO  | YES | NO | Retracted article                |
| Fujii, 1998h        | NO  | YES | NO | Retracted article                |
| Fujii, 1998i        | NO  | YES | NO | Retracted article                |
| Fujii, 1998j        | NO  | YES | NO | Retracted article                |
| Fujii, 1998k        | NO  | YES | NO | Retracted article                |
| Fujii, 1998l        | NO  | YES | NO | Retracted article                |
| Fujii, 1998m        | NO  | YES | NO | Retracted article                |
| Fujii, 1998n        | YES | YES | NO | Retracted article                |
| Fujii, 1998o        | YES | YES | NO | Retracted article                |
| Fujii, 1998q        | NO  | YES | NO | Retracted article                |
| Fujii, 1998r        | NO  | YES | NO | Retracted article                |
| Fujii, 1998s        | NO  | YES | NO | Retracted article                |
| Fujii, 1998t        | YES | YES | NO | Retracted article                |
| Fujii, 1998u        | NO  | YES | NO | Retracted article                |
| Gulec, 1998         | NO  | YES | NO | No serotonin receptor antagonist |
| Kathirvel, 1998     | NO  | YES | NO | No serotonin receptor antagonist |
| Lamond, 1998        | NO  | YES | NO | No serotonin receptor antagonist |
| Lauretti, 1998      | NO  | YES | NO | No serotonin receptor antagonist |
| López Herrera, 1998 | NO  | YES | NO | Non-English [Spanish]            |
| Nelskyla, 1998      | NO  | YES | NO | No serotonin receptor antagonist |
| Pan, 1998           | NO  | YES | NO | No serotonin receptor antagonist |
| Pappas, 1998        | NO  | YES | NO | No serotonin receptor antagonist |
| Rothenberg, 1998    | NO  | YES | NO | No serotonin receptor antagonist |
| Sanansilp, 1998     | NO  | YES | NO | No serotonin receptor antagonist |
| Serrano, 1998       | NO  | YES | NO | Non-English [Spanish]            |
| Shende, 1998        | NO  | YES | NO | No serotonin receptor antagonist |
| Steinbrook, 1998    | NO  | YES | NO | No relevant comparator           |
| Tan, 1998           | NO  | YES | NO | No serotonin receptor antagonist |
| Visalyaputra, 1998  | NO  | YES | NO | No serotonin receptor antagonist |
| Altintas, 1997      | NO  | YES | NO | No serotonin receptor antagonist |
| Cosar, 1997         | NO  | YES | NO | Non-English [Turkish]            |
| D'Angelo, 1997      | NO  | YES | NO | CA, >10 years                    |
| Flores, 1997        | NO  | YES | NO | Non-English [Spanish]            |
| Fujii, 1997         | YES | YES | NO | Retracted article                |
| Fujii, 1997b        | NO  | YES | NO | Retracted article                |
| Fujii, 1997c        | YES | YES | NO | Retracted article                |

|                  |     |     |    |                                  |
|------------------|-----|-----|----|----------------------------------|
| Fujii, 1997d     | YES | YES | NO | Retracted article                |
| Fujii, 1997e     | NO  | YES | NO | Retracted article                |
| Fujii, 1997f     | YES | YES | NO | Retracted article                |
| Fujii, 1997g     | YES | YES | NO | Retracted article                |
| Fujii, 1997h     | YES | NO  | NO | Retracted article                |
| Fujii, 1997i     | NO  | YES | NO | Retracted article                |
| Gan, 1997        | NO  | YES | NO | No serotonin receptor antagonist |
| Goode, 1997      | NO  | YES | NO | CA, >10 years                    |
| Hovorka, 1997    | NO  | YES | NO | No serotonin receptor antagonist |
| Hunting, 1997    | NO  | YES | NO | CA, >10 years                    |
| Jellish, 1997    | NO  | YES | NO | Duplicate of Jellish, 1998       |
| Khalil, 1997     | NO  | YES | NO | No serotonin receptor antagonist |
| Koivuranta, 1997 | NO  | YES | NO | No relevant comparator           |
| Lauretti, 1997   | NO  | YES | NO | No serotonin receptor antagonist |
| Lauretti, 1997b  | NO  | YES | NO | No serotonin receptor antagonist |
| Lauretti, 1997c  | NO  | YES | NO | No serotonin receptor antagonist |
| Lawrence, 1997   | NO  | YES | NO | No serotonin receptor antagonist |
| Lessard, 1997    | NO  | YES | NO | No serotonin receptor antagonist |
| Loo, 1997        | NO  | YES | NO | No serotonin receptor antagonist |
| Mansfield, 1997  | NO  | YES | NO | Not a relevant study design      |
| Mikawa, 1997     | NO  | YES | NO | No serotonin receptor antagonist |
| Najnigier, 1997  | NO  | YES | NO | Non-English [Polish]             |
| Ng, 1997         | NO  | YES | NO | No serotonin receptor antagonist |
| Ozalp, 1997      | NO  | YES | NO | Non-English [Turkish]            |
| Paech, 1997      | NO  | YES | NO | No serotonin receptor antagonist |
| Ploner, 1997     | NO  | YES | NO | Non-English [German]             |
| Richardson, 1997 | NO  | YES | NO | No serotonin receptor antagonist |
| Splinter, 1997   | NO  | YES | NO | No serotonin receptor antagonist |
| Splinter, 1997b  | NO  | YES | NO | No serotonin receptor antagonist |
| Sun, 1997        | NO  | YES | NO | CA, >10 years                    |
| Sun, 1997b       | NO  | YES | NO | No serotonin receptor antagonist |
| TerRiet, 1997    | NO  | YES | NO | CA, >10 years                    |
| April, 1996      | NO  | YES | NO | No serotonin receptor antagonist |
| Butrón, 1996     | NO  | YES | NO | No serotonin receptor antagonist |
| Chelly, 1996     | NO  | YES | NO | CA, >10 years                    |
| Cozanitis, 1996  | NO  | YES | NO | No serotonin receptor antagonist |
| Eberhart, 1996   | NO  | YES | NO | No serotonin receptor antagonist |
| Foster, 1996     | NO  | YES | NO | No serotonin receptor antagonist |
| Fujii, 1996      | NO  | YES | NO | Retracted article                |
| Fujii, 1996      | NO  | YES | NO | Retracted article                |
| Fujii, 1996      | YES | YES | NO | Retracted article                |
| Fujii, 1996      | NO  | YES | NO | Retracted article                |
| Fujii, 1996      | NO  | YES | NO | Retracted article                |
| Gilliland, 1996  | NO  | YES | NO | No serotonin receptor antagonist |
| Goyagi, 1996     | NO  | YES | NO | No serotonin receptor antagonist |
| Grebenik, 1996   | NO  | YES | NO | No serotonin receptor antagonist |
| Guard, 1996      | NO  | YES | NO | No serotonin receptor antagonist |
| Honkavaara, 1996 | NO  | YES | NO | No serotonin receptor antagonist |
| Huston, 1996     | NO  | YES | NO | CA, >10 years                    |
| Kaufman, 1996    | NO  | YES | NO | CA, >10 years                    |
| Khalil, 1996     | NO  | YES | NO | No serotonin receptor antagonist |

|                        |    |     |    |                                  |
|------------------------|----|-----|----|----------------------------------|
| Klahsen, 1996          | NO | YES | NO | No serotonin receptor antagonist |
| Laraki, 1996           | NO | YES | NO | No serotonin receptor antagonist |
| Lerman, 1996           | NO | YES | NO | No relevant outcome              |
| Maltepe, 1996          | NO | YES | NO | Non-English [Turkish]            |
| Mayzner-Zawadzka, 1996 | NO | YES | NO | CA, >10 years                    |
| McAllister, 1996       | NO | YES | NO | CA, >10 years                    |
| McKenzie               | NO | YES | NO | No relevant comparator           |
| Miles, 1996            | NO | YES | NO | Not a relevant study design      |
| Mjahed, 1996           | NO | YES | NO | Non-English [French]             |
| Park, 1996             | NO | YES | NO | No serotonin receptor antagonist |
| Pascucci, 1996         | NO | YES | NO | Non-English [Italian]            |
| Pertusa, 1996          | NO | YES | NO | Non-English [Spanish]            |
| Russell, 1996          | NO | YES | NO | No serotonin receptor antagonist |
| Saur, 1996             | NO | YES | NO | Non-English [German]             |
| Splinter, 1996         | NO | YES | NO | No serotonin receptor antagonist |
| Steinbrook, 1996       | NO | YES | NO | No relevant comparator           |
| Tom, 1996              | NO | YES | NO | No serotonin receptor antagonist |
| Top, 1996              | NO | YES | NO | Non-English [Turkish]            |
| Trakya, 1996           | NO | YES | NO | Non-English [Turkish]            |
| Unsold, 1996           | NO | YES | NO | No serotonin receptor antagonist |
| Valentine, 1996        | NO | YES | NO | No serotonin receptor antagonist |
| Vener, 1996            | NO | YES | NO | No serotonin receptor antagonist |
| Wagner, 1996           | NO | YES | NO | No serotonin receptor antagonist |
| Arfeen, 1995           | NO | YES | NO | No serotonin receptor antagonist |
| Borgeat, 1995          | NO | YES | NO | CA, >10 years                    |
| Chisakuta, 1995        | NO | YES | NO | No serotonin receptor antagonist |
| Freedman, 1995         | NO | YES | NO | No serotonin receptor antagonist |
| Fujii, 1995            | NO | YES | NO | Retracted article                |
| Gan, 1995              | NO | YES | NO | No serotonin receptor antagonist |
| Godsiff, 1995          | NO | YES | NO | No serotonin receptor antagonist |
| Grace, 1995            | NO | YES | NO | No serotonin receptor antagonist |
| Honkavaara, 1995       | NO | YES | NO | No serotonin receptor antagonist |
| Jellish, 1995          | NO | YES | NO | No serotonin receptor antagonist |
| Katayama, 1995         | NO | YES | NO | No serotonin receptor antagonist |
| Kymer, 1995            | NO | YES | NO | No serotonin receptor antagonist |
| Le Roy, 1995           | NO | YES | NO | CA, >10 years                    |
| Lunn, 1995             | NO | YES | NO | No serotonin receptor antagonist |
| Martínez, 1995         | NO | YES | NO | No serotonin receptor antagonist |
| Martins, 1995          | NO | YES | NO | Non-English [Spanish]            |
| McKenzie, 1995         | NO | YES | NO | No serotonin receptor antagonist |
| Mikawa, 1995           | NO | YES | NO | No serotonin receptor antagonist |
| Moerman, 1995          | NO | YES | NO | No serotonin receptor antagonist |
| Moscovici, 1995        | NO | YES | NO | No serotonin receptor antagonist |
| Polati, 1995           | NO | YES | NO | Non-English [Italian]            |
| Roberts, 1995          | NO | YES | NO | No serotonin receptor antagonist |
| Rodola, 1995           | NO | YES | NO | No serotonin receptor antagonist |
| Rohling, 1995          | NO | YES | NO | CA, >10 years                    |
| Splinter, 1995         | NO | YES | NO | No serotonin receptor antagonist |
| Sun, 1995              | NO | YES | NO | CA, >10 years                    |

|                    |     |     |    |                                  |
|--------------------|-----|-----|----|----------------------------------|
| Tarkkila, 1995     | NO  | YES | NO | No serotonin receptor antagonist |
| Tur, 1995          | NO  | YES | NO | Non-English [Turkish]            |
| Turkoglu, 1995     | NO  | YES | NO | No serotonin receptor antagonist |
| van den Berg, 1995 | NO  | YES | NO | CA, >10 years                    |
| Walder, 1995       | NO  | YES | NO | No serotonin receptor antagonist |
| Watcha, 1995       | NO  | YES | NO | No serotonin receptor antagonist |
| Fujii, 1995b       | NO  | YES | NO | Retracted article                |
| Alon, 1994         | NO  | YES | NO | Non-English [German]             |
| Barrow, 1994       | NO  | YES | NO | No serotonin receptor antagonist |
| Benhamou, 1994     | NO  | YES | NO | No serotonin receptor antagonist |
| Boeke, 1994        | NO  | YES | NO | No serotonin receptor antagonist |
| Brady, 1994        | NO  | YES | NO | No serotonin receptor antagonist |
| Calamandrei, 1994  | NO  | YES | NO | Non-English [French]             |
| Carr, 1994         | NO  | YES | NO | CA, >10 years                    |
| Ding, 1994         | NO  | YES | NO | No serotonin receptor antagonist |
| Doenicke, 1994     | NO  | YES | NO | No serotonin receptor antagonist |
| Doyle, 1994        | NO  | YES | NO | No serotonin receptor antagonist |
| Elliott, 1994      | NO  | YES | NO | No serotonin receptor antagonist |
| Foss, 1994         | NO  | YES | NO | No serotonin receptor antagonist |
| Fujii, 1994        | NO  | YES | NO | Retracted article                |
| Guldogus, 1994     | NO  | YES | NO | Non-English [Turkish]            |
| Harti, 1994        | NO  | YES | NO | No serotonin receptor antagonist |
| Honkavaara, 1994   | NO  | YES | NO | No serotonin receptor antagonist |
| Iannuzzi, 1994     | NO  | YES | NO | Non-English [Italian]            |
| Kafali, 1994       | NO  | YES | NO | Non-English [Turkish]            |
| Knudsen, 1994      | NO  | YES | NO | No serotonin receptor antagonist |
| Lewis, 1994        | NO  | YES | NO | No serotonin receptor antagonist |
| Mecklem, 1994      | NO  | YES | NO | No serotonin receptor antagonist |
| Reinhart, 1994     | NO  | YES | NO | No serotonin receptor antagonist |
| Rust, 1994         | NO  | YES | NO | Not a relevant study design      |
| Sandhya, 1994      | NO  | YES | NO | No serotonin receptor antagonist |
| Sohi, 1994         | NO  | YES | NO | No serotonin receptor antagonist |
| Spadafora, 1994    | NO  | YES | NO | CA, >10 years                    |
| Splinter, 1994     | NO  | YES | NO | No serotonin receptor antagonist |
| Stead, 1994        | NO  | YES | NO | No serotonin receptor antagonist |
| Tokat, 1994        | NO  | YES | NO | Non-English [Turkish]            |
| Tur, 1994          | NO  | YES | NO | Non-English [Turkish]            |
| Walder, 1994       | NO  | YES | NO | No serotonin receptor antagonist |
| Wildersmith, 1994  | NO  | YES | NO | No serotonin receptor antagonist |
| Fujii, 1994b       | YES | YES | NO | Retracted article                |
| Baxendale, 1993    | NO  | YES | NO | No serotonin receptor antagonist |
| Beattie, 1993      | NO  | YES | NO | No serotonin receptor antagonist |
| Bouly, 1993        | NO  | YES | NO | Non-English [French]             |
| Cade, 1993         | NO  | YES | NO | No serotonin receptor antagonist |
| Conroy, 1993       | NO  | YES | NO | CA, >10 years                    |
| Fogarty, 1993      | NO  | YES | NO | No serotonin receptor antagonist |
| Geiger, 1993       | NO  | YES | NO | CA, >10 years                    |
| Horta, 1993        | NO  | YES | NO | No serotonin receptor antagonist |

|                   |    |     |    |                                  |
|-------------------|----|-----|----|----------------------------------|
| Hyrkas, 1993      | NO | YES | NO | No serotonin receptor antagonist |
| Joshi, 1993       | NO | YES | NO | No serotonin receptor antagonist |
| Kandler, 1993     | NO | YES | NO | No serotonin receptor antagonist |
| Karlsson, 1993    | NO | YES | NO | No serotonin receptor antagonist |
| Klockgether, 1993 | NO | YES | NO | No serotonin receptor antagonist |
| Lawhorn, 1993     | NO | YES | NO | CA, >10 years                    |
| Patterson, 1993   | NO | YES | NO | No serotonin receptor antagonist |
| Pendeville, 1993  | NO | YES | NO | No serotonin receptor antagonist |
| Phillips, 1993    | NO | YES | NO | No serotonin receptor antagonist |
| Pitkanen, 1993    | NO | YES | NO | Not a relevant study design      |
| Sharma, 1993      | NO | YES | NO | No serotonin receptor antagonist |
| Tezcan, 1993      | NO | YES | NO | No serotonin receptor antagonist |
| Alon, 1993b       | NO | YES | NO | CA, >10 years                    |
| Lawhorn, 1993b    | NO | YES | NO | CA, >10 years                    |
| Bouly, 1992       | NO | YES | NO | Non-English [French]             |
| Carabine, 1992    | NO | YES | NO | No serotonin receptor antagonist |
| Friesen, 1992     | NO | YES | NO | No serotonin receptor antagonist |
| Khalil, 1992      | NO | YES | NO | No serotonin receptor antagonist |
| Klockgether, 1992 | NO | YES | NO | No serotonin receptor antagonist |
| Kumar, 1992       | NO | YES | NO | No serotonin receptor antagonist |
| Lin, 1992         | NO | YES | NO | No serotonin receptor antagonist |
| Migliavacca, 1992 | NO | YES | NO | No serotonin receptor antagonist |
| Muñoz, 1992       | NO | YES | NO | No serotonin receptor antagonist |
| Parnis, 1992      | NO | YES | NO | No serotonin receptor antagonist |
| Salmenpera, 1992  | NO | YES | NO | No serotonin receptor antagonist |
| Semple, 1992      | NO | YES | NO | No serotonin receptor antagonist |
| Blanc, 1991       | NO | YES | NO | No serotonin receptor antagonist |
| Brown, 1991       | NO | YES | NO | No serotonin receptor antagonist |
| Campbell, 1991    | NO | YES | NO | No serotonin receptor antagonist |
| Harris, 1991      | NO | YES | NO | No serotonin receptor antagonist |
| Horimoto, 1991    | NO | YES | NO | No serotonin receptor antagonist |
| Kraus, 1991       | NO | YES | NO | No serotonin receptor antagonist |
| Lim, 1991         | NO | YES | NO | No serotonin receptor antagonist |
| Patterson, 1991   | NO | YES | NO | No serotonin receptor antagonist |
| Rothenberg, 1991  | NO | YES | NO | No serotonin receptor antagonist |
| Scholtes, 1991    | NO | YES | NO | No serotonin receptor antagonist |
| Stromberg, 1991   | NO | YES | NO | No serotonin receptor antagonist |
| Watcha, 1991      | NO | YES | NO | No serotonin receptor antagonist |
| Whalley, 1991     | NO | YES | NO | No serotonin receptor antagonist |
| Anderson, 1990    | NO | YES | NO | No serotonin receptor antagonist |
| Bone, 1990        | NO | YES | NO | No serotonin receptor antagonist |
| Broadman, 1990    | NO | YES | NO | No serotonin receptor antagonist |
| Campbell, 1990    | NO | YES | NO | No serotonin receptor antagonist |
| Jorgensen, 1990   | NO | YES | NO | No serotonin receptor antagonist |
| Koski, 1990       | NO | YES | NO | No serotonin receptor antagonist |
| Larsson, 1990     | NO | YES | NO | No serotonin receptor antagonist |



|                    |    |     |    |                                  |
|--------------------|----|-----|----|----------------------------------|
| Ostman, 1990       | NO | YES | NO | No serotonin receptor antagonist |
| van der Walt, 1990 | NO | YES | NO | No serotonin receptor antagonist |
| Christensen, 1989  | NO | YES | NO | No serotonin receptor antagonist |
| Cramb, 1989        | NO | YES | NO | No serotonin receptor antagonist |
| Loper, 1989        | NO | YES | NO | No serotonin receptor antagonist |
| Schettini, 1989    | NO | YES | NO | No serotonin receptor antagonist |
| Tripple, 1989      | NO | YES | NO | No serotonin receptor antagonist |
| Wilkinson, 1989    | NO | YES | NO | No serotonin receptor antagonist |
| Wilkinson, 1989b   | NO | YES | NO | No serotonin receptor antagonist |
| Booij, 1988        | NO | YES | NO | No serotonin receptor antagonist |
| Diamond, 1988      | NO | YES | NO | No serotonin receptor antagonist |
| Gougeon, 1988      | NO | YES | NO | No serotonin receptor antagonist |
| King, 1988         | NO | YES | NO | No serotonin receptor antagonist |
| Larsson, 1988      | NO | YES | NO | No serotonin receptor antagonist |
| Mathia, 1988       | NO | YES | NO | No serotonin receptor antagonist |
| Miller, 1988       | NO | YES | NO | No serotonin receptor antagonist |
| Nicolson, 1988     | NO | YES | NO | No serotonin receptor antagonist |
| Simpson, 1988      | NO | YES | NO | No serotonin receptor antagonist |
| Tigerstedt, 1988   | NO | YES | NO | No serotonin receptor antagonist |
| Vollmer, 1988      | NO | YES | NO | No serotonin receptor antagonist |
| Alon, 1987         | NO | YES | NO | No serotonin receptor antagonist |
| Chapa, 1987        | NO | YES | NO | No serotonin receptor antagonist |
| Eustis, 1987       | NO | YES | NO | No serotonin receptor antagonist |
| Imbeloni, 1987     | NO | YES | NO | No serotonin receptor antagonist |
| Martin, 1987       | NO | YES | NO | No serotonin receptor antagonist |
| Millar, 1987       | NO | YES | NO | No serotonin receptor antagonist |
| Schuh, 1987        | NO | YES | NO | No serotonin receptor antagonist |
| Tolksdorf, 1987    | NO | YES | NO | No serotonin receptor antagonist |
| van den Berg, 1987 | NO | YES | NO | No serotonin receptor antagonist |
| van der Walt, 1987 | NO | YES | NO | No serotonin receptor antagonist |
| Chestnutt, 1986    | NO | YES | NO | No serotonin receptor antagonist |
| Clyburn, 1986      | NO | YES | NO | No serotonin receptor antagonist |
| Hardy, 1986        | NO | YES | NO | No serotonin receptor antagonist |
| Kauste, 1986       | NO | YES | NO | No serotonin receptor antagonist |
| Madej, 1986        | NO | YES | NO | No serotonin receptor antagonist |
| Madej, 1986b       | NO | YES | NO | No serotonin receptor antagonist |
| Mogensen, 1986     | NO | YES | NO | No serotonin receptor antagonist |
| Pandit, 1986       | NO | YES | NO | No serotonin receptor antagonist |
| Ponnudurai, 1986   | NO | YES | NO | No serotonin receptor antagonist |
| Tolksdorf, 1986    | NO | YES | NO | No serotonin receptor antagonist |
| Uppington, 1986    | NO | YES | NO | No serotonin receptor antagonist |
| Briggs, 1985       | NO | YES | NO | No serotonin receptor antagonist |
| Duarte, 1985       | NO | YES | NO | No serotonin receptor antagonist |
| Hammond, 1985      | NO | YES | NO | No serotonin receptor antagonist |
| Korttila, 1985     | NO | YES | NO | No serotonin receptor antagonist |
| Paul, 1985         | NO | YES | NO | No serotonin receptor antagonist |

|                         |    |     |     |                                  |
|-------------------------|----|-----|-----|----------------------------------|
| Tolksdorf, 1985         | NO | YES | NO  | No serotonin receptor antagonist |
| Valanne, 1985           | NO | YES | NO  | No serotonin receptor antagonist |
| Waldmann, 1985          | NO | YES | NO  | No serotonin receptor antagonist |
| Layfield, 1984          | NO | YES | NO  | No serotonin receptor antagonist |
| Lazar, 1984             | NO | YES | NO  | No serotonin receptor antagonist |
| O'Donovan, 1984         | NO | YES | NO  | No serotonin receptor antagonist |
| Abramowitz, 1983        | NO | YES | NO  | No serotonin receptor antagonist |
| Chan, 1983              | NO | YES | NO  | No serotonin receptor antagonist |
| Davies, 1983            | NO | YES | NO  | No serotonin receptor antagonist |
| Guldager, 1983          | NO | YES | NO  | No serotonin receptor antagonist |
| Alon, 1982              | NO | YES | NO  | No serotonin receptor antagonist |
| McKenzie, 1982          | NO | YES | NO  | No serotonin receptor antagonist |
| Mortensen, 1982         | NO | YES | NO  | No serotonin receptor antagonist |
| Peters, 1982            | NO | YES | NO  | No serotonin receptor antagonist |
| Karhunen, 1981          | NO | YES | NO  | No serotonin receptor antagonist |
| Mattila, 1981           | NO | YES | NO  | No serotonin receptor antagonist |
| Rita, 1981              | NO | YES | NO  | No serotonin receptor antagonist |
| Mattila, 1981b          | NO | YES | NO  | No serotonin receptor antagonist |
| Diamond, 1980           | NO | YES | NO  | No serotonin receptor antagonist |
| Hovi-Viander, 1980      | NO | YES | NO  | No serotonin receptor antagonist |
| Boulanger, 1979         | NO | YES | NO  | No serotonin receptor antagonist |
| Cooke, 1979             | NO | YES | NO  | No serotonin receptor antagonist |
| Hernández-Palazón, 1979 | NO | NO  | YES | No serotonin receptor antagonist |
| Korttila, 1979a         | NO | YES | NO  | No serotonin receptor antagonist |
| Mattila, 1979b          | NO | YES | NO  | No serotonin receptor antagonist |
| Mattila, 1979c          | NO | YES | NO  | No serotonin receptor antagonist |
| Richardson, 1979        | NO | YES | NO  | No serotonin receptor antagonist |
| Wilson, 1979            | NO | YES | NO  | No serotonin receptor antagonist |
| Dodson, 1978            | NO | YES | NO  | No serotonin receptor antagonist |
| Iwamoto, 1978           | NO | YES | NO  | No serotonin receptor antagonist |
| Fassolt, 1977           | NO | YES | NO  | No serotonin receptor antagonist |
| Fozard, 1977            | NO | YES | NO  | No serotonin receptor antagonist |
| Galloon, 1977           | NO | YES | NO  | No serotonin receptor antagonist |
| Winning, 1977           | NO | YES | NO  | No serotonin receptor antagonist |
| Alsner, 1976            | NO | YES | NO  | No serotonin receptor antagonist |
| Prescott, 1976          | NO | YES | NO  | No serotonin receptor antagonist |
| Dundee, 1975            | NO | YES | NO  | No serotonin receptor antagonist |
| Loach, 1975             | NO | YES | NO  | No serotonin receptor antagonist |
| Geens, 1974             | NO | YES | NO  | No serotonin receptor antagonist |
| Mattila, 1974           | NO | YES | NO  | No serotonin receptor antagonist |
| Zsigmond, 1974          | NO | YES | NO  | No serotonin receptor antagonist |
| Boyd, 1973              | NO | YES | NO  | No serotonin receptor antagonist |
| Wilson, 1973            | NO | YES | NO  | No serotonin receptor antagonist |
| Shah, 1972              | NO | YES | NO  | No serotonin receptor antagonist |
| Breivik, 1971           | NO | YES | NO  | No serotonin receptor antagonist |
| Davies, 1971            | NO | YES | NO  | No serotonin receptor antagonist |
| Ellis, 1970             | NO | YES | NO  | No serotonin receptor antagonist |

|               |    |     |    |                                  |
|---------------|----|-----|----|----------------------------------|
| Lind, 1970    | NO | YES | NO | No serotonin receptor antagonist |
| Gordon, 1969  | NO | YES | NO | No serotonin receptor antagonist |
| Dobkin, 1968  | NO | YES | NO | No serotonin receptor antagonist |
| Ratra, 1968   | NO | YES | NO | No serotonin receptor antagonist |
| Handley, 1967 | NO | YES | NO | No serotonin receptor antagonist |
| Snow, 1967    | NO | YES | NO | No serotonin receptor antagonist |

**Abbreviations:** CA, conference abstract; NMA, network meta-analysis.

0, study wasn't included in particular review. 1, study was included in particular review.

#### Appendix 4. Study characteristics

| Author, year                              | Country of conduct | Study conduct period           | Study duration (hours) | Setting        | Interventions examined                                                  | Outcomes Reported       |
|-------------------------------------------|--------------------|--------------------------------|------------------------|----------------|-------------------------------------------------------------------------|-------------------------|
| <i>Randomized clinical trials (n=429)</i> |                    |                                |                        |                |                                                                         |                         |
| Browning, 2013                            | Australia          | NR                             | NR                     | Multi-centre   | Ondansetron, Placebo                                                    | Nausea, Vomiting        |
| Aleyasin, 2012                            | Iran               | February 2010 - January 2011   | 18                     | Hospital       | Granisetron                                                             | Nausea, Vomiting        |
| Blitz, 2012                               | NR                 | NR                             | 72                     | NR             | Palonosetron + Dexamethasone                                            | Nausea, Vomiting, PONV  |
| Choi, 2012                                | South Korea        | NR                             | 48                     | NR             | Ondansetron + Dexamethasone, Ramosetron + Dexamethasone                 | Nausea, Vomiting, PONV, |
| de Orange, 2012                           | Brazil             | March 2011 - July 2011         | 24                     | Hospital       | Dexamethasone, Ondansetron + Dexamethasone, Placebo                     | Vomiting                |
| Eidi, 2012                                | Iran               | NR                             | 24                     | Hospital       | Dexamethasone, Ondansetron, Placebo                                     | Nausea, Vomiting, PONV  |
| Gurha, 2012 <sup>†</sup>                  | India              | NR                             | 24                     | Hospital       | Granisetron, Ondansetron, Palonosetron                                  | PONV                    |
| Koh, 2012                                 | Korea              | September 2009 - February 2010 | 48                     | NR             | Placebo, Ramosetron                                                     | Nausea, Vomiting, PONV  |
| Lahsaei, 2012                             | Iran               | Fall 2010                      | 24                     | Hospital       | Ondansetron, Placebo                                                    | Nausea, Vomiting, PONV  |
| Madenoglu, 2012                           | Turkey             | NR                             | 72                     | NR             | Dexamethasone, Palonosetron + Dexamethasone                             | Nausea, Vomiting, PONV  |
| Moon, 2012                                | South Korea        | January 2010 - November 2010   | 24                     | Hospital       | Ondansetron, Palonosetron                                               | Nausea, Vomiting        |
| Park JW, 2012                             | Korea              | NR                             | 24                     | NR             | Palonosetron + Dexamethasone, Palonosetron                              | Nausea, Vomiting, PONV  |
| Wang, 2012                                | China (Taiwan)     | NR                             | 24                     | NR             | Dexamethasone, Haloperidol + Dexamethasone, Ondansetron + Dexamethasone | Nausea, PONV            |
| Ahmed, 2011                               | Egypt              | NR                             | 24                     | NR             | Mirtazapine, Ondansetron                                                | Nausea, Vomiting, PONV  |
| Apfel, 2011 <sup>†</sup>                  | USA                | NR                             | 72                     | Multi-centre   | Ondansetron, Palonosetron                                               | PONV                    |
| Asl, 2011                                 | Iran               | 2008                           | NR                     | Medical center | Ondansetron, Placebo                                                    | Nausea, Vomiting        |
| Bajwa, 2011                               | India              | January 2010 - May 2011        | 72                     | NR             | Ondansetron, Palonosetron                                               | Nausea, Vomiting        |
| Basu, 2011                                | India              | September 2007 - February 2009 | 24                     | Hospital       | Granisetron, Ondansetron, Palonosetron                                  | Nausea, Vomiting        |
| Bhattarai, 2011                           | Nepal              | NR                             | 24                     | NR             | Ondansetron, Ondansetron + Dexamethasone                                | PONV                    |
| Bicer, 2011                               | Turkey             | March 2009 - December 2009     | 48                     | Medical center | Palonosetron, Palonosetron                                              | Nausea, Vomiting, PONV  |

|                    |                   |                                |     |                |                                                               |                        |
|--------------------|-------------------|--------------------------------|-----|----------------|---------------------------------------------------------------|------------------------|
| D'Souza, 2011      | India             | NR                             | 24  | NR             | Dexamethasone, Ondansetron                                    | Vomiting, PONV         |
| Ekinci, 2011       | Turkey            | February 2007 - March 2008     | 48  | NR             | Droperidol, Metoclopramide, Ondansetron, Placebo, Tropisetron | PONV                   |
| El-deeb, 2011a     | Egypt             | NR                             | 24  | NR             | Ondansetron + Dexamethasone, Placebo                          | Nausea, Vomiting, PONV |
| El-deeb, 2011b     | Egypt             | NR                             | 24  | NR             | Granisetron + Dexamethasone, Placebo                          | Nausea, Vomiting       |
| El-deeb, 2011c     | Egypt             | NR                             | 24  | Hospital       | Ondansetron, Placebo                                          | Nausea, Vomiting       |
| Gan, 2011          | USA, Canada       | NR                             | 119 | NR             | Ondansetron, Placebo, Rolapitant                              | Nausea, Vomiting, PONV |
| Islam, 2011        | Bangladesh        | July 2008 - June 2009          | 24  | Hospital       | Granisetron, Granisetron + Dexamethasone                      | PONV                   |
| Khan, 2011         | Pakistan          | 2007 - 2008                    | 12  | Hospital       | Metoclopramide, Ondansetron                                   | Nausea, Vomiting       |
| Lee, 2011          | South Korea       | NR                             | 48  | NR             | Ondansetron, Ramosetron                                       | Nausea, Vomiting, PONV |
| Metaxari, 2011     | Greece            | March 2006 - March 2009        | 24  | NR             | Granisetron, Ondansetron, Placebo, Tropisetron                | Nausea, Vomiting       |
| Park, 2011         | Republic of Korea | June 2010 - September 2010     | 24  | Hospital       | Ondansetron, Palonosetron                                     | Nausea, Vomiting, PONV |
| Ryu, 2011          | South Korea       | NR                             | 48  | NR             | Ramosetron, Tropisetron                                       | Nausea, Vomiting, PONV |
| Safae, 2011        | Iran              | 2010                           | 24  | Hospital       | Dexamethasone, Ondansetron                                    | Nausea, Vomiting       |
| Sahoo, 2011        | India             | September 2008 - December 2008 | 1   | NR             | Ondansetron, Placebo                                          | Nausea                 |
| Singh, 2011        | India             | NR                             | 24  | NR             | Granisetron, Placebo                                          | Nausea, Vomiting       |
| Song, 2011         | South Korea       | NR                             | 48  | NR             | Ondansetron, Ondansetron + Dexamethasone                      | PONV                   |
| Srivastava, 2011   | India             | NR                             | 24  | NR             | Granisetron, Metoclopramide, Ondansetron                      | Vomiting, PONV         |
| Talesh, 2011       | Iran              | NR                             | 24  | NR             | Metoclopramide, Ondansetron                                   | Vomiting               |
| Vale, 2011         | Portugal          | NR                             | 24  | Hospital       | Ondansetron, Placebo                                          | Nausea, Vomiting, PONV |
| Akhtar, 2010       | India             | January 2010 - March 2011      | 48  | Hospital       | Ondansetron, Ramosetron                                       | Nausea, Vomiting, PONV |
| Alghanem, 2010     | Jordan            | November 2007 - March 2008     | 24  | Hospital       | Dexamethasone, Ondansetron, Placebo                           | Nausea, PONV           |
| Bhattachajee, 2010 | India             | NR                             | 48  | Medical center | Granisetron, Palonosetron                                     | Nausea, Vomiting, PONV |
| Bilgin, 2010       | Turkey            | NR                             | 24  | NR             | Dexamethasone, Metoclopramide, Ondansetron, Placebo           | Nausea, Vomiting, PONV |
| Choi, 2010         | Korea             | September 2008 - February 2009 | 48  | NR             | Ondansetron, Placebo, Ramosetron                              | Nausea, Vomiting, PONV |

|                                                            |                                                         |                                         |     |              |                                                                      |                              |
|------------------------------------------------------------|---------------------------------------------------------|-----------------------------------------|-----|--------------|----------------------------------------------------------------------|------------------------------|
| Dabbous, 2010                                              | Lebanon                                                 | NR                                      | 24  | NR           | Granisetron +<br>Dexamethasone,<br>Ondansetron +<br>Dexamethasone    | Vomiting,<br>PONV            |
| Ebrahim Soltani,<br>2010 (CR:<br>Ebrahim Soltani,<br>2011) | Iran                                                    | 2007 - 2008                             | 24  | Hospital     | Metoclopramide,<br>Ondansetron, Placebo                              | Nausea,<br>Vomiting          |
| Hahm, 2010                                                 | South Korea                                             | November<br>2008 -<br>September<br>2009 | 48  | NR           | Ondansetron,<br>Tropisetron                                          | Nausea,<br>Vomiting,<br>PONV |
| Huh, 2010                                                  | Korea                                                   | NR                                      | 24  | Hospital     | Ondansetron, Placebo                                                 | Nausea,<br>Vomiting,<br>PONV |
| Jee, 2010                                                  | Korea                                                   | NR                                      | 36  | NR           | Metoclopramide +<br>Dexamethasone,<br>Ondansetron +<br>Dexamethasone | Nausea,<br>Vomiting,<br>PONV |
| Jokela, 2010                                               | Finland                                                 | December<br>2007 -<br>January 2009      | 24  | Hospital     | Ondansetron, Placebo                                                 | Vomiting,<br>PONV            |
| Mishra, 2010                                               | India                                                   | NR                                      | 24  | NR           | Metoclopramide,<br>Ondansetron                                       | PONV                         |
| Omar, 2010                                                 | Egypt                                                   | NR                                      | NR  | NR           | Metoclopramide,<br>Ondansetron                                       | Nausea,<br>Vomiting          |
| Rauers, 2010                                               | Germany,<br>Switzerland                                 | NR                                      | 48  | NR           | Metoclopramide,<br>Ondansetron, Placebo                              | Nausea,<br>Vomiting,<br>PONV |
| Ryu, 2010                                                  | South Korea                                             | NR                                      | 48  | NR           | Ondansetron,<br>Ramosetron                                           | Nausea,<br>Vomiting,<br>PONV |
| Shakya, 2010                                               | India                                                   | NR                                      | 2   | NR           | Ondansetron, Placebo                                                 | PONV                         |
| Singla, 2010                                               | Belgium, Canada,<br>Germany,<br>Hungary, Spain,<br>USA. | NR                                      | 119 | Multi-centre | Casopitant,<br>Ondansetron,<br>Ondansetron +<br>Casopitant           | Nausea,<br>Vomiting,<br>PONV |
| Tan, 2010                                                  | Ireland                                                 | NR                                      | 24  | NR           | Granisetron,<br>Ondansetron                                          | PONV                         |
| Yun, 2010                                                  | Korea                                                   | NR                                      | 48  | NR           | Azasetron,<br>Ondansetron                                            | Nausea,<br>Vomiting,<br>PONV |
| Farouk, 2009                                               | Egypt                                                   | NR                                      | 24  | NR           | Ondansetron, Placebo                                                 | PONV                         |
| Feng, 2009                                                 | Taiwan                                                  | NR                                      | 24  | NR           | Haloperidol,<br>Ondansetron,<br>Ondansetron +<br>Haloperidol         | Nausea,<br>Vomiting,<br>PONV |
| Gan, 2009                                                  | USA                                                     | NR                                      | 72  | Hospital     | Granisetron,<br>Granisetron +<br>Promethazine,<br>Promethazine       | Nausea,<br>Vomiting,<br>PONV |
| Gandhi, 2009                                               | India                                                   | NR                                      | 24  | NR           | Dexamethasone,<br>Ondansetron, Placebo                               | Nausea,<br>Vomiting,<br>PONV |
| Grover, 2009                                               | India                                                   | NR                                      | 24  | NR           | Ondansetron, Placebo                                                 | Nausea,<br>Vomiting,<br>PONV |
| Jain, 2009                                                 | India                                                   | NR                                      | 24  | NR           | Granisetron,<br>Ondansetron, Placebo                                 | Nausea,<br>Vomiting,<br>PONV |
| Jellish, 2009                                              | USA                                                     | NR                                      | 48  | NR           | Ondansetron,<br>Ondansetron +<br>Prochlorperazine                    | Nausea,<br>Vomiting          |
| Kim, 2009                                                  | Korea                                                   | NR                                      | 24  | NR           | Ondansetron, Placebo,<br>Ramosetron                                  | Nausea,<br>Vomiting,<br>PONV |
| Riad, 2009                                                 | Saudi Arabia                                            | NR                                      | 24  | NR           | Granisetron +<br>Dexamethasone,<br>Ondansetron +                     | Nausea,<br>Vomiting          |

|                               |                                    |                                        |     |                |                                                                                          |                              |
|-------------------------------|------------------------------------|----------------------------------------|-----|----------------|------------------------------------------------------------------------------------------|------------------------------|
|                               |                                    |                                        |     |                | Dexamethasone,<br>Placebo                                                                |                              |
| Rosow, 2009                   | USA                                | NR                                     | NR  | Hospital       | Haloperidol,<br>Ondansetron                                                              | Nausea,<br>Vomiting,<br>PONV |
| Aghadavoudi,<br>2008          | Iran                               | NR                                     | 24  | NR             | Granisetron,<br>Metoclopramide,<br>Placebo                                               | Nausea,<br>Vomiting,<br>PONV |
| Bano, 2008                    | Pakistan                           | March 2007<br>- September<br>2007      | 24  | Hospital       | Dexamethasone,<br>Ondansetron +<br>Dexamethasone                                         | Nausea,<br>Vomiting,<br>PONV |
| Bhatia, 2008                  | India                              | NR                                     | NR  | NR             | Granisetron,<br>Metoclopramide,<br>Ondansetron, Placebo                                  | Nausea,<br>Vomiting,<br>PONV |
| Candiotti, 2008               | USA, Romainia                      | NR                                     | 72  | NR             | Palonosetron, Placebo                                                                    | Nausea,<br>Vomiting,<br>PONV |
| Choi, 2008                    | South Korea                        | September<br>2006 - June<br>2007       | 48  | NR             | Ondansetron,<br>Ramosetron                                                               | Nausea,<br>Vomiting          |
| Contreras-<br>Dominguez, 2008 | Chile                              | December<br>2003 -<br>February<br>2006 | 48  | Hospital       | Dexamethasone,<br>Droperidol,<br>Granisetron,<br>Metoclopramide,<br>Placebo, Tropisetron | PONV                         |
| Cruz, 2008                    | Puerto Rico                        | NR                                     | 24  | Hospital       | Ondansetron +<br>Dexamethasone                                                           | Nausea,<br>Vomiting,<br>PONV |
| Davis, 2008                   | USA                                | NR                                     | 60  | NR             | Ondansetron +<br>Dexamethasone                                                           | Vomiting                     |
| Erhan, 2008                   | Turkey                             | NR                                     | 24  | NR             | Dexamethasone,<br>Granisetron,<br>Ondansetron, Placebo                                   | Nausea,<br>Vomiting,<br>PONV |
| Gautam, 2008                  | Nepal                              | NR                                     | 24  | Hospital       | Dexamethasone,<br>Ondansetron,<br>Ondansetron +<br>Dexamethasone                         | Nausea,<br>Vomiting,<br>PONV |
| Gupta, 2008                   | India                              | NR                                     | 24  | NR             | Granisetron,<br>Metoclopramide,<br>Ondansetron                                           | Vomiting                     |
| Kaki, 2008                    | Saudi Arabia                       | NR                                     | 24  | Hospital       | Metoclopramide,<br>Ondansetron, Placebo                                                  | PONV                         |
| Kovac, 2008                   | Germany, Poland,<br>Czech Republic | NR                                     | 72  | Multi-centre   | Palonosetron, Placebo                                                                    | Nausea,<br>Vomiting,<br>PONV |
| Krobbuaban,<br>2008           | Thailand                           | NR                                     | 24  | Hospital       | Metoclopramide,<br>Ondansetron                                                           | PONV                         |
| Lee, 2008                     | Republic of Korea                  | NR                                     | 24  | NR             | Placebo, Ramosetron                                                                      | Nausea,<br>Vomiting,<br>PONV |
| Ng, 2008                      | China                              | August 2003<br>- May 2004              | 3   | NR             | Ondansetron, Placebo                                                                     | Vomiting,<br>PONV            |
| Olatosi, 2008                 | Nigeria                            | NR                                     | 24  | NR             | Ondansetron, Placebo,<br>Promethazine                                                    | Nausea,<br>Vomiting          |
| Pan, 2008                     | USA                                | NR                                     | 119 | Medical center | Ondansetron,<br>Ondansetron +<br>Dexamethasone                                           | Nausea,<br>Vomiting,<br>PONV |
| Piper, 2008                   | Germany,<br>Switzerland            | 1999 - 2004                            | 24  | NR             | Dolsetron, Droperidol,<br>Placebo                                                        | Nausea,<br>Vomiting,<br>PONV |
| Said-Ahmed,<br>2008           | Egypt                              | NR                                     | 24  | NR             | Granisetron, Placebo                                                                     | Vomiting                     |
| Sajedi, 2008                  | Iran                               | NR                                     | NR  | Hospital       | Granisetron, Placebo                                                                     | Nausea,<br>Vomiting          |
| Sakellaris, 2008              | Greece                             | NR                                     | 24  | NR             | Ondansetron, Placebo                                                                     | PONV                         |
| Schnaider, 2008               | Brazil                             | NR                                     | 35  | NR             | Dexamethasone,<br>Droperidol,<br>Metoclopramide,<br>Ondansetron,                         | Nausea,<br>Vomiting          |

|                 |                                                                                   |                                         |      |                |                                                                                                               |                              |
|-----------------|-----------------------------------------------------------------------------------|-----------------------------------------|------|----------------|---------------------------------------------------------------------------------------------------------------|------------------------------|
|                 |                                                                                   |                                         |      |                | Ondansetron +<br>Dexamethasone,<br>Ondansetron +<br>Droperidol                                                |                              |
| Aouad, 2007     | Lebanon                                                                           | NR                                      | 24   | Medical center | Haloperidol,<br>Ondansetron, Placebo                                                                          | Nausea,<br>Vomiting,<br>PONV |
| Balki, 2007     | Canada                                                                            | May 2005 -<br>November<br>2005          | 24   | Hospital       | Granisetron, Placebo                                                                                          | Nausea,<br>Vomiting          |
| Bestas, 2007    | Turkey                                                                            | NR                                      | 24   | Medical center | Granisetron,<br>Ondansetron, Placebo                                                                          | PONV                         |
| Bhatagnar, 2007 | India                                                                             | NR                                      | 24   | Hospital       | Granisetron,<br>Ondansetron, Placebo                                                                          | Nausea,<br>Vomiting,<br>PONV |
| Bolton, 2007    | Australia                                                                         | October<br>1999 -<br>March 2004         | 24   | Hospital       | Metoclopramide,<br>Ondansetron                                                                                | Vomiting                     |
| Boonmak, 2007   | Thailand                                                                          | NR                                      | 24   | Hospital       | Ondansetron                                                                                                   | Nausea,<br>Vomiting          |
| Candiotti, 2007 | USA                                                                               | NR                                      | 24   | NR             | Granisetron,<br>Ondansetron                                                                                   | Nausea, PONV                 |
| Diemunsch, 2007 | North America<br>(including USA),<br>South America,<br>Europe, Australia,<br>Asia | May 2004 -<br>April 2005                | 48   | NR             | Aprepitant,<br>Ondansetron                                                                                    | Nausea,<br>Vomiting,<br>PONV |
| Gan, 2007       | Multicentred                                                                      | September<br>2003 -<br>November<br>2004 | 48   | NR             | Aprepitant,<br>Ondansetron                                                                                    | Nausea,<br>Vomiting,<br>PONV |
| Gombar, 2007    | India                                                                             | NR                                      | 24   | NR             | Granisetron,<br>Granisetron +<br>Dexamethasone,<br>Placebo                                                    | Vomiting,<br>PONV            |
| Gulhas, 2007    | Turkey                                                                            | NR                                      | 24   | NR             | Ondansetron, Placebo                                                                                          | Nausea,<br>Vomiting,<br>PONV |
| Han, 2007       | Korea                                                                             | NR                                      | 48   | NR             | Ondansetron                                                                                                   | Nausea,<br>Vomiting          |
| Harnett, 2007   | USA                                                                               | NR                                      | 24   | Hospital       | Ondansetron, Placebo,<br>Scopolamine                                                                          | Nausea,<br>Vomiting          |
| Kushwaha, 2007  | India                                                                             | NR                                      | 24   | NR             | Granisetron,<br>Granisetron +<br>Dexamethasone,<br>Ondansetron,<br>Ondansetron +<br>Dexamethasone,<br>Placebo | PONV                         |
| Lee, 2007       | Republic of China<br>(Taiwan)                                                     | NR                                      | 24   | NR             | Haloperidol,<br>Ondansetron                                                                                   | Nausea,<br>Vomiting,<br>PONV |
| Moussa, 2007    | Saudi Arabia                                                                      | NR                                      | 24   | NR             | Granisetron,<br>Granisetron +<br>Dexamethasone,<br>Granisetron +<br>Droperidol, Placebo                       | Nausea,<br>Vomiting,<br>PONV |
| Oksuz, 2007     | Turkey                                                                            | NR                                      | 24   | NR             | Granisetron,<br>Metoclopramide,<br>Ondansetron                                                                | Nausea,<br>Vomiting,<br>PONV |
| Paech, 2007     | Australia                                                                         | March 2001<br>- December<br>2003        | 24   | Hospital       | Ondansetron +<br>Dexamethasone                                                                                | Nausea,<br>Vomiting,<br>PONV |
| Rusch, 2007     | Germany                                                                           | NR                                      | 24   | Hospital       | Dolsetron, Dolsetron +<br>Dexamethasone,<br>Haloperidol,<br>Haloperidol +<br>Dexamethasone                    | Vomiting,<br>PONV            |
| Sagir, 2007     | Turkey                                                                            | NR                                      | 0.25 | NR             | Granisetron, Placebo                                                                                          | PONV                         |



|                     |                            |                              |    |                |                                                                                           |                        |
|---------------------|----------------------------|------------------------------|----|----------------|-------------------------------------------------------------------------------------------|------------------------|
| Sandhu, 2007        | Thailand                   | NR                           | 24 | NR             | Metoclopramide, Ondansetron                                                               | Nausea, Vomiting       |
| Sarkar, 2007        | India                      | January 2007 - June 2007     | 24 | Hospital       | Metoclopramide, Ondansetron                                                               | Nausea, Vomiting       |
| Sharma, 2007        | India                      | NR                           | 7  | Hospital       | Ondansetron, Placebo                                                                      | Nausea, Vomiting       |
| Siddik-Sayyid, 2007 | Lebanon                    | NR                           | 24 | Medical center | Granisetron, Ondansetron, Placebo                                                         | Nausea, Vomiting, PONV |
| Sodhi, 2007         | India                      | NR                           | NR | NR             | Dexamethasone, Granisetron, Granisetron + Dexamethasone                                   | Nausea, Vomiting, PONV |
| Sriraman, 2007      | India                      | NR                           | NR | NR             | Granisetron + Dexamethasone, Ondansetron + Dexamethasone                                  | Nausea, Vomiting, PONV |
| Subramaniam, 2007   | India                      | NR                           | 24 | Medical center | Ondansetron, Placebo                                                                      | Nausea, Vomiting, PONV |
| Teran, 2007         | USA                        | NR                           | 24 | Medical center | Granisetron, Placebo                                                                      | PONV                   |
| White, 2007         | USA                        | NR                           | 72 | Multi-centre   | Ondansetron, Scopolamine                                                                  | Nausea, PONV           |
| Wig, 2007           | India                      | NR                           | 24 | NR             | Ondansetron, Placebo                                                                      | Nausea, Vomiting       |
| Akin, 2006          | Turkey                     | NR                           | 24 | Hospital       | Placebo, Tropisetron                                                                      | Nausea, Vomiting, PONV |
| Birmingham, 2006    | USA                        | NR                           | 24 | Medical center | Dolsetron, Ondansetron                                                                    | Vomiting, PONV         |
| Bridge, 2006        | USA                        | NR                           | 24 | Hospital       | Dolsetron, Granisetron, Ondansetron                                                       | PONV                   |
| Chan, 2006          | USA, Hong Kong, New Zeland | September 2002 - June 2004   | 48 | NR             | Droperidol, Ondansetron, Ondansetron + Droperidol, Placebo                                | PONV                   |
| Eberhart, 2006      | Germany                    | NR                           | 24 | NR             | Dexamethasone, Placebo, Tropisetron, Tropisetron + Dexamethasone                          | Nausea, PONV           |
| Gunter, 2006        | USA                        | NR                           | 24 | Medical center | Metoclopramide + Dexamethasone, Ondansetron + Dexamethasone, Ondansetron + Metoclopramide | Vomiting               |
| Gupta, 2006         | NR                         | October 2004 - January 2005  | NR | NR             | Dexamethasone, Ondansetron                                                                | Nausea, Vomiting       |
| Isik, 2006          | Turkey                     | January 2004 - December 2004 | 24 | Hospital       | Dexamethasone, Ondansetron                                                                | Nausea, Vomiting, PONV |
| Janicki, 2006       | USA                        | NR                           | 24 | NR             | Dolsetron, Granisetron                                                                    | Nausea, Vomiting, PONV |
| Jellish, 2006       | USA                        | NR                           | 48 | NR             | Ondansetron                                                                               | Nausea, Vomiting       |
| Johns, 2006         | UK                         | NR                           | 24 | NR             | Cyclizine, Granisetron, Granisetron + Cyclizine                                           | Nausea, Vomiting, PONV |
| Khan, 2006          | India                      | NR                           | 24 | NR             | Granisetron, Granisetron + Dexamethasone, Placebo                                         | PONV                   |
| Kolm, 2006          | Brazil                     | NR                           | 3  | Hospital       | Droperidol, Ondansetron, Placebo                                                          | PONV                   |
| Leksowski, 2006     | Poland                     | NR                           | 12 | NR             | Dexamethasone,                                                                            | Nausea,                |

|                            |                |                                       |    |              |                                                                                                                                                        |                              |
|----------------------------|----------------|---------------------------------------|----|--------------|--------------------------------------------------------------------------------------------------------------------------------------------------------|------------------------------|
|                            |                |                                       |    |              | Metoclopramide,<br>Metoclopramide +<br>Dexamethasone,<br>Ondansetron,<br>Ondansetron +<br>Dexamethasone,<br>Ondansetron +<br>Metoclopramide,<br>Placeb | Vomiting                     |
| Paranhos de<br>Abreu, 2006 | Spain          | NR                                    | NR | NR           | Dexamethasone,<br>Droperidol,<br>Metoclopramide,<br>Ondansetron, Placebo                                                                               | Nausea,<br>Vomiting          |
| Peixoto, 2006              | Brazil, USA    | April 2001 -<br>August 2003           | 24 | NR           | Droperidol,<br>Ondansetron, Placebo                                                                                                                    | Nausea,<br>Vomiting,<br>PONV |
| Purhonen, 2006a            | Finland        | Sept 2003 -<br>June 2004              | 24 | NR           | Ondansetron, Placebo                                                                                                                                   | Nausea,<br>Vomiting,<br>PONV |
| Purhonen, 2000b            | Finland        | NR                                    | 24 | Hospital     | Ondansetron, Placebo                                                                                                                                   | Nausea,<br>Vomiting,<br>PONV |
| Sarvela, 2006              | Finland        | January 2003<br>- November<br>2003    | 24 | NR           | Ondansetron, Placebo,<br>Tropisetron                                                                                                                   | Nausea,<br>PONV              |
| Tosun, 2006                | Turkey         | NR                                    | 24 | NR           | Placebo, Tropisetron                                                                                                                                   | Vomiting                     |
| Tseng, 2006                | China (Taiwan) | July 2005 -<br>Sept 2005              | 24 | NR           | Granisetron, Placebo                                                                                                                                   | Nausea,<br>Vomiting,<br>PONV |
| Veneziani, 2006            | Italy          | NR                                    | 24 | NR           | Dolsetron, Dolsetron +<br>Dexamethasone,<br>Droperidol, Placebo                                                                                        | Nausea,<br>Vomiting          |
| White, 2006                | USA            | NR                                    | 48 | Multi-centre | Granisetron,<br>Ondansetron                                                                                                                            | Nausea,<br>Vomiting,<br>PONV |
| Cohen, 2005                | USA            | NR                                    | 24 | NR           | Dexamethasone,<br>Ondansetron +<br>Dexamethasone                                                                                                       | Nausea,<br>Vomiting          |
| D'Angelo, 2005             | USA            | March 2002<br>- August<br>2002        | 24 | Multi-centre | Granisetron, Placebo                                                                                                                                   | Nausea,<br>Vomiting,<br>PONV |
| Demiraran, 2005            | Turkey         | January<br>2003-<br>December<br>2004  | 60 | NR           | Ondansetron, Placebo                                                                                                                                   | Nausea,<br>Vomiting          |
| Gan, 2005                  | USA            | NR                                    | 24 | NR           | Granisetron +<br>Dexamethasone,<br>Ondansetron +<br>Dexamethasone                                                                                      | Nausea,<br>Vomiting,<br>PONV |
| Hartsell, 2005             | USA            | October<br>2000 -<br>December<br>2002 | 72 | Hospital     | Ondansetron, Placebo                                                                                                                                   | Nausea,<br>Vomiting          |
| Iatrou, 2005               | Greece         | December<br>2003 -<br>March 2004      | 24 | NR           | Dolsetron,<br>Ondansetron, Placebo                                                                                                                     | PONV                         |
| Kabalak, 2005              | Turkey         | NR                                    | 24 | NR           | Ondansetron, Placebo                                                                                                                                   | Vomiting                     |
| Khan, 2005                 | Saudi Arabia   | January 2004<br>- June 2004           | 12 | Hospital     | Granisetron,<br>Ondansetron, Placebo                                                                                                                   | Nausea,<br>Vomiting,<br>PONV |
| Kocamanoglu,<br>2005       | Turkey         | NR                                    | 24 | NR           | Droperidol,<br>Granisetron,<br>Granisetron +<br>Dexamethasone,<br>Granisetron +<br>Droperidol, Placebo                                                 | Nausea,<br>Vomiting,<br>PONV |
| Kontrimaviciute,<br>2005   | Lithuania      | NR                                    | 24 | Hospital     | Ondansetron, Placebo                                                                                                                                   | Nausea,<br>PONV              |
| Misra, 2005                | India          | NR                                    | 24 | NR           | Ondansetron, Placebo                                                                                                                                   | Nausea,                      |

|                                   |                                                   |                                         |    |                |                                                                                                                                                   |                              |
|-----------------------------------|---------------------------------------------------|-----------------------------------------|----|----------------|---------------------------------------------------------------------------------------------------------------------------------------------------|------------------------------|
|                                   |                                                   |                                         |    |                |                                                                                                                                                   | Vomiting                     |
|                                   |                                                   |                                         |    |                |                                                                                                                                                   | Nausea,<br>Vomiting,<br>PONV |
| Pirat, 2005                       | Turkey                                            | NR                                      | 24 | NR             | Ondansetron, Placebo                                                                                                                              | Nausea,<br>Vomiting,<br>PONV |
| Treschan, 2005                    | Germany                                           | NR                                      | 24 | NR             | Ondansetron, Placebo                                                                                                                              | Nausea,<br>Vomiting,<br>PONV |
| White, 2005 <sup>†</sup>          | USA                                               | NR                                      | 24 | NR             | Palonosetron, Placebo                                                                                                                             | Vomiting,<br>PONV            |
| Alkaiissi, 2004                   | Sweden                                            | May 2000 -<br>January 2001              | 24 | Multi-centre   | Droperidol,<br>Granisetron, Placebo                                                                                                               | Nausea,<br>Vomiting,<br>PONV |
| Apfel, 2004 (CR:<br>Jokela, 2009) | Germany, USA,<br>Finland, UK,<br>Turkey, Slovakia | February<br>2000 - July<br>2002         | 24 | NR             | Dexamethasone,<br>Droperidol,<br>Droperidol +<br>Dexamethasone,<br>Ondansetron,<br>Ondansetron +<br>Dexamethasone,<br>Ondansetron +<br>Droperidol | Nausea,<br>Vomiting,<br>PONV |
| Barbone, 2004                     | Italy                                             | NR                                      | 24 | Hospital       | Dolsetron,<br>Ondansetron                                                                                                                         | Nausea,<br>Vomiting          |
| Barbosa, 2004                     | Brazil                                            | April 2001 -<br>June 2002               | 24 | Hospital       | Ondansetron<br>Ondansetron,<br>Ondansetron +<br>Dexamethasone,<br>Placebo                                                                         | PONV<br>Vomiting,<br>PONV    |
| Bhardwaj, 2004                    | India                                             | NR                                      | 24 | NR             | Ondansetron, Placebo                                                                                                                              | PONV                         |
| Binstock, 2004                    | USA                                               | NR                                      | 24 | NR             | Dolsetron,<br>Ondansetron                                                                                                                         | Nausea,<br>Vomiting          |
| Browning, 2004                    | USA                                               | NR                                      | 24 | Medical center | Ondansetron +<br>Dexamethasone,<br>Placebo                                                                                                        | Vomiting,<br>PONV            |
| Celiker, 2004                     | Turkey                                            | NR                                      | 24 | NR             | Granisetron,<br>Ondansetron, Placebo                                                                                                              | Nausea,<br>Vomiting,<br>PONV |
| Dua, 2004                         | India                                             | NR                                      | 24 | NR             | Dolsetron, Dolsetron +<br>Droperidol, Placebo                                                                                                     | Nausea,<br>Vomiting,<br>PONV |
| Eberhart, 2004                    | Germany                                           | NR                                      | 24 | NR             | Ondansetron, Placebo                                                                                                                              | Nausea,<br>Vomiting,<br>PONV |
| Gan, 2004                         | USA                                               | NR                                      | 24 | NR             | Ondansetron, Placebo                                                                                                                              | Nausea                       |
| Han, 2004                         | Korea                                             | NR                                      | 48 | NR             | Granisetron, Placebo                                                                                                                              | Nausea,<br>Vomiting          |
| Hanaoka, 2004                     | Japan                                             | NR                                      | 24 | Multi-centre   | Dolsetron,<br>Ondansetron                                                                                                                         | PONV                         |
| Meyer, 2004                       | USA                                               | September<br>1998 -<br>February<br>1999 | NR | Hospital       | Ondansetron +<br>Dexamethasone                                                                                                                    | PONV                         |
| Panda, 2004                       | India                                             | NR                                      | 48 | Hospital       | Dexamethasone,<br>Ondansetron,<br>Ondansetron +<br>Dexamethasone,<br>Placebo                                                                      | Nausea,<br>Vomiting          |
| Samakarndi, 2004                  | Saudi Arabia                                      | NR                                      | 24 | NR             | Ondansetron, Placebo                                                                                                                              | Nausea,<br>Vomiting,<br>PONV |
| Sinha, 2004                       | India                                             | NR                                      | 48 | Medical center | Droperidol,<br>Ondansetron, Placebo                                                                                                               | PONV                         |
| Bharti, 2003                      | India                                             | NR                                      | 24 | Medical center | Dexamethasone,<br>Ondansetron,<br>Ondansetron +<br>Dexamethasone,<br>Placebo                                                                      | Nausea,<br>Vomiting,<br>PONV |
| Biswas, 2003a                     | India                                             | NR                                      | 24 | NR             |                                                                                                                                                   |                              |

|                          |           |                                |     |                |                                                                                                                     |                              |
|--------------------------|-----------|--------------------------------|-----|----------------|---------------------------------------------------------------------------------------------------------------------|------------------------------|
| Biswas, 2003b            | India     | NR                             | 24  | Hospital       | Granisetron,<br>Granisetron +<br>Dexamethasone                                                                      | Nausea,<br>Vomiting,<br>PONV |
| Burmeister, 2003         | Germany   | NR                             | 24  | NR             | Dolsetron, Placebo                                                                                                  | Nausea,<br>Vomiting,<br>PONV |
| Charuluxananan,<br>2003  | Thailand  | NR                             | 24  | Hospital       | Ondansetron, Placebo                                                                                                | Nausea,<br>Vomiting,<br>PONV |
| Karamanlioglu,<br>2003   | Turkey    | NR                             | 24  | NR             | Dolsetron,<br>Ondansetron, Placebo                                                                                  | Nausea,<br>Vomiting,<br>PONV |
| Loewen, 2003             | Canada    | May 2000 -<br>December<br>2001 | 24  | NR             | Dolsetron, Droperidol                                                                                               | Nausea,<br>Vomiting,<br>PONV |
| Maddali, 2003            | Oman      | NR                             | 24  | NR             | Metoclopramide +<br>Dexamethasone,<br>Ondansetron +<br>Dexamethasone,<br>Placebo                                    | Nausea,<br>Vomiting,<br>PONV |
| Madenoglu, 2003          | Turkey    | NR                             | 24  | Hospital       | Placebo, Tropisetron                                                                                                | Nausea,<br>Vomiting          |
| O'Brien, 2003            | UK        | NR                             | 24  | Hospital       | Cyclizine,<br>Ondansetron, Placebo                                                                                  | Vomiting                     |
| Olutoye, 2003            | USA       | NR                             | 119 | NR             | Dolsetron,<br>Ondansetron                                                                                           | Vomiting,<br>PONV            |
| Oztekin, 2003            | Turkey    | NR                             | 48  | NR             | Droperidol,<br>Tropisetron                                                                                          | Vomiting                     |
| Paech, 2003              | Australia | NR                             | 24  | NR             | Dolsetron,<br>Ondansetron,<br>Tropisetron                                                                           | Nausea,<br>Vomiting,<br>PONV |
| Pan, 2003                | India     | NR                             | 24  | NR             | Ondansetron, Placebo                                                                                                | Nausea,<br>Vomiting          |
| Samra, 2003 <sup>†</sup> | USA       | NR                             | 24  | NR             | Dolsetron, Droperidol,<br>Ondansetron, Placebo                                                                      | PONV                         |
| Szarvas, 2003            | Ireland   | NR                             | 24  | NR             | Dexamethasone,<br>Ondansetron,<br>Ondansetron +<br>Dexamethasone                                                    | Nausea,<br>Vomiting,<br>PONV |
| Tang, 2003               | USA       | NR                             | 24  | Medical center | Dolsetron,<br>Ondansetron, Placebo                                                                                  | Nausea,<br>PONV              |
| Thagaard, 2003           | Norway    | NR                             | 72  | Hospital       | Ondansetron, Placebo                                                                                                | Nausea,<br>Vomiting          |
| Tzeng, 2003              | Taiwan    | NR                             | 24  | NR             | Ondansetron, Placebo                                                                                                | Nausea,<br>PONV              |
| Usmani, 2003             | India     | NR                             | 24  | Hospital       | Dexamethasone,<br>Ondansetron,<br>Ondansetron +<br>Dexamethasone                                                    | Nausea,<br>Vomiting,<br>PONV |
| Wagner, 2003             | USA       | NR                             | 24  | Medical center | Dolsetron, Placebo                                                                                                  | Vomiting,<br>PONV            |
| Wattwil, 2003            | Sweden    | NR                             | 24  | Hospital       | Dexamethasone,<br>Ondansetron                                                                                       | Nausea,<br>Vomiting,<br>PONV |
| Yukse, 2003              | Turkey    | NR                             | 24  | NR             | Dexamethasone,<br>Ondansetron, Placebo                                                                              | Nausea,<br>Vomiting,<br>PONV |
| Adducci, 2002            | Italy     | NR                             | 24  | Hospital       | Metoclopramide,<br>Metoclopramide +<br>Dexamethasone,<br>Ondansetron,<br>Ondansetron +<br>Dexamethasone,<br>Placebo | Nausea,<br>Vomiting,<br>PONV |
| Agarwal, 2002            | India     | NR                             | 24  | NR             | Ondansetron, Placebo                                                                                                | Nausea,<br>Vomiting,<br>PONV |
| Arcioni, 2002            | Italy     | NR                             | 24  | Hospital       | Ondansetron, Placebo                                                                                                | Vomiting                     |
| Argiriadou, 2002         | Greece    | NR                             | 12  | Hospital       | Ondansetron, Placebo,                                                                                               | Nausea,                      |

|                       |                |    |    |              |                                                                                   |                        |
|-----------------------|----------------|----|----|--------------|-----------------------------------------------------------------------------------|------------------------|
|                       |                |    |    |              | Tropisetron                                                                       | Vomiting               |
| Coloma, 2002          | USA            | NR | 72 | NR           | Ondansetron, Placebo                                                              | Nausea, Vomiting, PONV |
| Coloma, 2002          | USA            | NR | 24 | NR           | Dolsetron, Dolsetron + Dexamethasone                                              | Nausea, Vomiting, PONV |
| Elhakim, 2002         | Egypt          | NR | 24 | NR           | Ondansetron, Ondansetron + Dexamethasone, Placebo                                 | Nausea, Vomiting, PONV |
| Fabling, 2002         | Australia      | NR | 48 | NR           | Dexamethasone, Ondansetron + Dexamethasone                                        | Nausea, Vomiting       |
| Gan, 2002             | USA            | NR | 24 | NR           | Ondansetron, Placebo                                                              | Nausea, Vomiting       |
| Goksu, 2002           | Turkey         | NR | 24 | NR           | Droperidol, Granisetron, Granisetron + Dexamethasone                              | Nausea, Vomiting, PONV |
| Grimsehl, 2002        | UK             | NR | 48 | NR           | Cyclizine, Ondansetron                                                            | Nausea, Vomiting, PONV |
| Jokela, 2002          | Finland        | NR | 24 | Multi-centre | Metoclopramide, Ondansetron, Tropisetron                                          | Nausea, PONV           |
| Lee, 2002             | South Korea    | NR | 24 | NR           | Granisetron, Placebo, Ramosetron                                                  | Nausea, Vomiting, PONV |
| Marcus, 2002          | USA            | NR | NR | NR           | Ondansetron, Placebo                                                              | Nausea, Vomiting       |
| Mullick, 2002         | India          | NR | 24 | NR           | Metoclopramide, Ondansetron, Ondansetron + Metoclopramide                         | Nausea, Vomiting       |
| Munro, 2002           | UK             | NR | 24 | NR           | Droperidol, Ondansetron, Placebo                                                  | Nausea, Vomiting, PONV |
| Ozmen, 2002           | Turkey         | NR | 24 | NR           | Granisetron, Granisetron + Droperidol                                             | Vomiting, PONV         |
| Paech, 2002           | Australia      | NR | 24 | NR           | Dolsetron, Placebo                                                                | Nausea, Vomiting, PONV |
| Quaynor, 2002         | Norway         | NR | 24 | NR           | Metoclopramide, Ondansetron                                                       | Vomiting, PONV         |
| Sanchez-Ledesma, 2002 | Spain          | NR | 48 | NR           | Droperidol + Dexamethasone, Ondansetron + Dexamethasone, Ondansetron + Droperidol | Nausea, PONV           |
| Sennaraj, 2002        | India, USA, UK | NR | 24 | NR           | Ondansetron, Placebo                                                              | Nausea, PONV           |
| So, 2002              | Singapore      | NR | 24 | NR           | Ondansetron, Placebo                                                              | Nausea, Vomiting       |
| Sukhani, 2002         | USA            | NR | 48 | NR           | Dolsetron, Ondansetron, Placebo                                                   | Vomiting, PONV         |
| Wang, 2002a           | Taiwan         | NR | 24 | NR           | Dexamethasone, Placebo, Tropisetron                                               | Nausea, Vomiting, PONV |
| Wang, 2002b           | Taiwan         | NR | 24 | Hospital     | Dexamethasone, Placebo, Tropisetron                                               | Nausea, PONV           |
| Wang, 2002            | Taiwan         | NR | 24 | NR           | Dexamethasone, Placebo, Tropisetron                                               | Nausea, PONV           |
| White, 2002           | USA            | NR | 72 | NR           | Ondansetron, Placebo                                                              | Nausea, Vomiting       |
| Yazigi, 2002          | Lebanon        | NR | 24 | Hospital     | Ondansetron, Placebo                                                              | PONV                   |
| Bowhay, 2001          | UK             | NR | 24 | NR           | Ondansetron, Placebo                                                              | Vomiting               |

|                         |                                           |                                 |     |          |                                                                     |                              |
|-------------------------|-------------------------------------------|---------------------------------|-----|----------|---------------------------------------------------------------------|------------------------------|
| Cherian, 2001           | UK                                        | NR                              | 24  | Hospital | Ondansetron, Placebo                                                | PONV                         |
| Dabbous, 2001           | Lebanon                                   | NR                              | 24  | NR       | Droperidol,<br>Metoclopramide,<br>Ondansetron                       | Nausea                       |
| De Witte, 2001          | Belgium                                   | NR                              | 24  | NR       | Ondansetron, Placebo                                                | PONV                         |
| Ganem, 2001             | Barzil                                    | NR                              | 12  | NR       | Alizapride,<br>Ondansetron                                          | Nausea,<br>Vomiting,<br>PONV |
| Goll, 2001              | Austria                                   | NR                              | 24  | NR       | Ondansetron, Placebo                                                | Nausea,<br>Vomiting,<br>PONV |
| Kathirvel, 2001         | India                                     | NR                              | 24  | NR       | Ondansetron, Placebo                                                | Nausea,<br>Vomiting,<br>PONV |
| Millo, 2001             | UK                                        | NR                              | 24  | NR       | Droperidol,<br>Ondansetron                                          | Nausea,<br>Vomiting,<br>PONV |
| Pan, 2001               | USA                                       | NR                              | 24  | NR       | Metoclopramide,<br>Ondansetron, Placebo                             | Nausea,<br>Vomiting          |
| Paventi, 2001           | Italy                                     | NR                              | 24  | NR       | Ondansetron                                                         | Nausea,<br>PONV              |
| Shende, 2001            | India                                     | NR                              | 24  | NR       | Droperidol,<br>Ondansetron,<br>Ondansetron +<br>Droperidol, Placebo | Nausea,<br>Vomiting,<br>PONV |
| Somri, 2001             | Israel                                    | NR                              | 24  | Hospital | Ondansetron, Placebo                                                | Vomiting                     |
| Splinter, 2001          | Canada                                    | NR                              | 24  | NR       | Dexamethasone,<br>Ondansetron +<br>Dexamethasone                    | Vomiting                     |
| Subramaniam,<br>2001    | India                                     | NR                              | 24  | NR       | Dexamethasone,<br>Ondansetron, Placebo                              | Nausea,<br>PONV              |
| Thomas, 2001            | UK                                        | NR                              | 24  | Hospital | Dexamethasone,<br>Ondansetron +<br>Dexamethasone                    | Nausea,<br>Vomiting,<br>PONV |
| White, 2001             | UK                                        | NR                              | 24  | Hospital | Ondansetron, Placebo                                                | Nausea,<br>Vomiting          |
| Wilson, 2001            | USA                                       | NR                              | 24  | Hospital | Metoclopramide,<br>Ondansetron, Placebo                             | Nausea,<br>Vomiting,<br>PONV |
| Yilmazlar, 2001         | Turkey                                    | NR                              | 3   | NR       | Placebo, Tropisetron                                                | Vomiting                     |
| Ahmed, 2000             | UK                                        | NR                              | 24  | NR       | Ondansetron,<br>Ondansetron +<br>Cyclizine, Placebo                 | Nausea,<br>Vomiting,<br>PONV |
| Charuluxananan,<br>2000 | Thailand                                  | NR                              | 4   | Hospital | Ondansetron, Placebo                                                | PONV                         |
| Fabling, 2000           | USA                                       | NR                              | 48  | NR       | Droperidol,<br>Ondansetron, Placebo                                 | Nausea,<br>Vomiting          |
| Gesztesi, 2000          | USA                                       | NR                              | 119 | NR       | 721, CP-122,<br>Ondansetron,<br>Ondansetron + CP-122                | Nausea,<br>Vomiting          |
| Holt, 2000              | Australia                                 | NR                              | 24  | Hospital | Tropisetron,<br>Tropisetron +<br>Dexamethasone                      | Vomiting                     |
| Jensen, 2000            | australia                                 | NR                              | 24  | Hospital | Placebo, Tropisetron                                                | Vomiting                     |
| Jokela, 2000            | Finland                                   | NR                              | 24  | NR       | Ondansetron, Placebo                                                | Nausea,<br>PONV              |
| Kothari, 2000           | USA                                       | November<br>1998 - June<br>1999 | 24  | NR       | Dimenhydrinate,<br>Ondansetron                                      | Nausea,<br>Vomiting          |
| Kreisler, 2000          | USA                                       | NR                              | 24  | NR       | Droperidol,<br>Ondansetron,<br>Promethazine                         | PONV                         |
| Ku, 2000                | China                                     | January 1995<br>- June 1997     | 24  | NR       | Ondansetron, Placebo                                                | Nausea,<br>Vomiting          |
| Lee, 2000               | Republic of China<br>(Taiwan),<br>Germany | NR                              | 24  | NR       | Ondansetron, Placebo,<br>Prochlorperazine                           | Vomiting                     |

|                  |                 |                                 |     |                |                                                                     |                              |
|------------------|-----------------|---------------------------------|-----|----------------|---------------------------------------------------------------------|------------------------------|
| Liberman, 2000   | USA             | June 1996 -<br>February<br>1998 | 336 | NR             | Ondansetron, Placebo                                                | Nausea,<br>Vomiting          |
| Najeeb, 2000     | India           | NR                              | 24  | NR             | Droperidol,<br>Granisetron, Placebo                                 | Nausea,<br>Vomiting,<br>PONV |
| Peixoto, 2000    | Brazil, USA     | NR                              | 24  | NR             | Droperidol,<br>Ondansetron,<br>Ondansetron +<br>Droperidol          | Nausea,<br>PONV              |
| Philip, 2000     | USA             | NR                              | 24  | Multi-centre   | Dolsetron, Placebo                                                  | Nausea,<br>PONV              |
| Reihner, 2000    | Sweden          | NR                              | 24  | Hospital       | Droperidol,<br>Ondansetron, Placebo                                 | Nausea,<br>Vomiting,<br>PONV |
| Sadhasivam, 2000 | USA             | NR                              | 24  | NR             | Ondansetron, Placebo                                                | PONV                         |
| Scuderi, 2000    | USA             | NR                              | 119 | Medical center | Ondansetron, Placebo                                                | Nausea,<br>Vomiting,<br>PONV |
| Sharma, 2000     | Malaysia        | NR                              | 24  | NR             | Droperidol,<br>Metoclopramide,<br>Ondansetron, Placebo              | PONV                         |
| Wu, 2000         | Canada          | NR                              | 24  | Hospital       | Droperidol,<br>Ondansetron,<br>Ondansetron +<br>Droperidol, Placebo | PONV                         |
| Zarate, 2000     | USA             | NR                              | 24  | NR             | Dolsetron,<br>Ondansetron                                           | Nausea,<br>Vomiting,<br>PONV |
| Abouleish, 1999  | USA             | NR                              | 2   | NR             | Ondansetron, Placebo                                                | Nausea,<br>Vomiting          |
| Allen, 1999      | Australia       | NR                              | 24  | Hospital       | Placebo, Tropisetron                                                | Vomiting                     |
| Barst, 1999      | USA             | NR                              | 24  | Multi-centre   | Ondansetron, Placebo                                                | Vomiting                     |
| Broome, 1999     | UK              | NR                              | 24  | NR             | Metoclopramide,<br>Ondansetron                                      | Nausea,<br>Vomiting          |
| Bugedo, 1999     | Chile           | NR                              | 24  | NR             | Droperidol,<br>Ondansetron,<br>Ondansetron +<br>Droperidol, Placebo | Nausea,<br>Vomiting          |
| Cholwill, 1999   | UK              | NR                              | 24  | NR             | Cyclizine,<br>Ondansetron, Placebo                                  | Nausea,<br>Vomiting,<br>PONV |
| de Adana, 1999   | Spain           | NR                              | 48  | Hospital       | Ondansetron, Placebo                                                | PONV                         |
| Gurler, 1999     | Turkey          | NR                              | 48  | NR             | Dexamethasone,<br>Ondansetron +<br>Dexamethasone                    | Vomiting                     |
| Helmy, 1999      | Egypt           | NR                              | 24  | NR             | Droperidol,<br>Metoclopramide,<br>Ondansetron, Placebo              | Nausea,<br>Vomiting          |
| Janknegt, 1999   | The Netherlands | NR                              | 119 | NR             | Droperidol,<br>Granisetron,<br>Granisetron +<br>Dexamethasone       | Nausea,<br>Vomiting,<br>PONV |
| Jokela, 1999     | finland         | October<br>1997 - May<br>1998   | 24  | Hospital       | Droperidol,<br>Tropisetron                                          | Nausea,<br>Vomiting,<br>PONV |
| Kathirvel, 1999  | India           | NR                              | 24  | NR             | Metoclopramide,<br>Ondansetron, Placebo                             | Nausea,<br>Vomiting,<br>PONV |
| Khalil, 1999     | USA             | NR                              | 24  | NR             | Ondansetron, Placebo,<br>Promethazine                               | Nausea,<br>Vomiting,<br>PONV |
| Koivuranta, 1999 | Finland         | NR                              | 24  | Hospital       | Ondansetron,<br>Tropisetron                                         | Nausea,<br>Vomiting          |
| Kovac, 1999      | USA             | NR                              | 24  | Multi-centre   | Ondansetron, Placebo                                                | Nausea,<br>PONV              |
| Kyokong, 1999    | Thiland         | NR                              | 24  | Hospital       | Ondansetron, Placebo                                                | Nausea,<br>Vomiting          |

|                      |                                                                                                                         |    |    |                |                                                                                |                              |
|----------------------|-------------------------------------------------------------------------------------------------------------------------|----|----|----------------|--------------------------------------------------------------------------------|------------------------------|
| McCall, 1999         | USA                                                                                                                     | NR | 8  | NR             | Dimenhydrinate,<br>Ondansetron, Placebo                                        | Vomiting,<br>PONV            |
| Munro, 1999          | USA                                                                                                                     | NR | 24 | NR             | Granisetron, Placebo                                                           | Vomiting                     |
| Rajeeva, 1999        | India                                                                                                                   | NR | 24 | NR             | Ondansetron,<br>Ondansetron +<br>Dexamethasone                                 | Nausea,<br>Vomiting          |
| Sadhasivam, 1999     | India                                                                                                                   | NR | 24 | NR             | Ondansetron, Placebo                                                           | Nausea,<br>PONV              |
| Sandhu, 1999         | Canada                                                                                                                  | NR | 24 | NR             | Dimenhydrinate,<br>Ondansetron, Placebo                                        | Nausea,<br>Vomiting          |
| Scuderi, 1999a       | USA                                                                                                                     | NR | NR | Hospital       | Ondansetron, Placebo                                                           | Nausea,<br>Vomiting,<br>PONV |
| Scuderi, 1999b       | USA                                                                                                                     | NR | NR | Hospital       | Ondansetron, Placebo                                                           | Nausea,<br>Vomiting          |
| Sinha, 1999          | India                                                                                                                   | NR | 48 | Hospital       | Ondansetron, Placebo                                                           | Nausea,<br>Vomiting,<br>PONV |
| Swiatkowski,<br>1999 | Poland                                                                                                                  | NR | 24 | NR             | Droperidol,<br>Ondansetron                                                     | Nausea,<br>Vomiting          |
| Tsui, 1999           | China                                                                                                                   | NR | 48 | Hospital       | Ondansetron, Placebo,<br>Tropisetron                                           | Nausea,<br>Vomiting          |
| Turhanoglu, 1999     | Turkey                                                                                                                  | NR | 24 | NR             | Dimenhydrinate,<br>Ondansetron,<br>Ondansetron +<br>Dimenhydrinate,<br>Placebo | Nausea,<br>Vomiting          |
| Wagley, 1999         | USA                                                                                                                     | NR | 29 | Medical center | Ondansetron, Placebo                                                           | Nausea,<br>Vomiting          |
| Woodward, 1999       | UK                                                                                                                      | NR | 24 | Hospital       | Metoclopramide,<br>Ondansetron                                                 | Nausea,<br>Vomiting          |
| Alon, 1998           | Switzerland                                                                                                             | NR | 24 | NR             | Placebo, Tropisetron                                                           | Nausea                       |
| Ang, 1998            | Australia                                                                                                               | NR | 24 | Hospital       | Placebo, Tropisetron                                                           | Vomiting                     |
| Bacic, 1998          | Croatia                                                                                                                 | NR | 24 | NR             | Ondansetron, Placebo                                                           | PONV                         |
| Chan, 1998           | Hong Kong                                                                                                               | NR | 48 | Hospital       | Placebo, Tropisetron                                                           | Nausea,<br>Vomiting          |
| Chen, 1998a          | USA                                                                                                                     | NR | 48 | NR             | Ondansetron,<br>Prochlorperazine                                               | Nausea,<br>Vomiting          |
| Chen, 1998b          | China                                                                                                                   | NR | 24 | Hospital       | Ondansetron, Placebo                                                           | Vomiting                     |
| Dabbous, 1998        | Lebanon                                                                                                                 | NR | 24 | NR             | Metoclopramide,<br>Ondansetron                                                 | Vomiting                     |
| Daftary, 1998        | India                                                                                                                   | NR | 8  | NR             | Metoclopramide,<br>Ondansetron, Placebo                                        | Nausea,<br>Vomiting          |
| Dershwitz, 1998      | USA                                                                                                                     | NR | 24 | NR             | Ondansetron, Placebo                                                           | Nausea                       |
| Diemunsch, 1998      | France                                                                                                                  | NR | 24 | NR             | Dolsetron, Placebo                                                             | Nausea,<br>PONV              |
| Doe, 1998            | USA                                                                                                                     | NR | 24 | NR             | Droperidol,<br>Ondansetron                                                     | Nausea,<br>Vomiting          |
| Dresner, 1998        | England                                                                                                                 | NR | 24 | NR             | Droperidol,<br>Ondansetron                                                     | Nausea,<br>Vomiting          |
| Goodarzi, 1998       | USA                                                                                                                     | NR | 48 | NR             | Droperidol,<br>Ondansetron, Placebo                                            | Vomiting,<br>PONV            |
| Hamid, 1998          | Canada                                                                                                                  | NR | 24 | NR             | Dimenhydrinate,<br>Ondansetron, Placebo                                        | Vomiting                     |
| Jellish, 1998        | USA                                                                                                                     | NR | 24 | Medical center | Droperidol,<br>Ondansetron, Placebo                                            | Nausea,<br>Vomiting,<br>PONV |
| Mitra, 1998          | India                                                                                                                   | NR | 24 | NR             | Dexamethasone,<br>Ondansetron,<br>Ondansetron +<br>Dexamethasone,<br>Placebo   | Nausea,<br>Vomiting,<br>PONV |
| Morris, 1998         | Australia, Canada,<br>Denmark, France,<br>Germany, Iceland,<br>Israel, Netherlands,<br>Norway, South<br>Africa, Sweden, | NR | 24 | Multi-centre   | Metoclopramide,<br>Ondansetron, Placebo                                        | Nausea,<br>Vomiting          |



| UK                      |                                                        |    |    |                |                                                    |                        |
|-------------------------|--------------------------------------------------------|----|----|----------------|----------------------------------------------------|------------------------|
| Scholz, 1998            | Germany                                                | NR | 24 | NR             | Ondansetron, Placebo, Tropisetron                  | Nausea, Vomiting       |
| Splinter, 1998a         | Canada                                                 | NR | 24 | NR             | Ondansetron, Ondansetron + Dexamethasone           | Vomiting               |
| Splinter, 1998b         | Canada                                                 | NR | 24 | Hospital       | Ondansetron, Perphenazine                          | Vomiting               |
| Tang, 1998a             | USA                                                    | NR | 24 | Medical center | Palonosetron, Placebo                              | Vomiting, PONV         |
| Tang, 1998b             | USA                                                    | NR | 24 | Medical center | Ondansetron, Placebo                               | Nausea, Vomiting, PONV |
| Tramer, 1998            | Switzerland                                            | NR | 48 | Hospital       | Ondansetron, Placebo                               | Vomiting               |
| Akcabay, 1997           | Turkey                                                 | NR | 24 | NR             | Ondansetron, Placebo                               | Nausea, Vomiting       |
| Alexander, 1997         | UK                                                     | NR | 24 | NR             | Metoclopramide, Ondansetron, Placebo               | Nausea, PONV           |
| Ascaso, 1997            | Spain                                                  | NR | 24 | Hospital       | Metoclopramide, Ondansetron, Placebo               | Nausea, Vomiting       |
| Bach-Styles, 1997       | USA                                                    | NR | 24 | Medical center | Metoclopramide, Ondansetron, Placebo               | Vomiting               |
| Carnahan, 1997          | USA                                                    | NR | 24 | NR             | Granisetron, Placebo                               | Vomiting               |
| Diemunsch, 1997a        | France                                                 | NR | 24 | NR             | Metoclopramide, Ondansetron                        | Nausea                 |
| Diemunsch, 1997b        | France                                                 | NR | 24 | NR             | Dolsetron, Placebo                                 | Nausea, PONV           |
| Diemunsch, 1997c        | Europe                                                 | NR | 24 | NR             | Dolsetron, Placebo                                 | Nausea, PONV, PONV,    |
| Graczyk, 1997           | USA                                                    | NR | 24 | NR             | Dolsetron, Placebo                                 |                        |
| Klockgether-Radke, 1997 | Germany                                                | NR | 24 | NR             | Droperidol, Ondansetron, Placebo                   | Vomiting, PONV         |
| Koivuranta, 1997        | Finland                                                | NR | 24 | Hospital       | Droperidol, Ondansetron, Placebo                   | Nausea, Vomiting       |
| Korttila, 1997          | finland                                                | NR | 24 | Multi-centre   | Dolsetron, Ondansetron, Placebo                    | Nausea, PONV           |
| Kovac, 1997             | USA                                                    | NR | 24 | NR             | Dolsetron, Placebo                                 | Nausea, PONV           |
| Lawhorn, 1997           | USA                                                    | NR | 24 | Hospital       | Ondansetron, Ondansetron + Metoclopramide, Placebo | Vomiting               |
| Maestre, 1997           | Spain                                                  | NR | 24 | NR             | Droperidol, Metoclopramide, Ondansetron, Placebo   | Nausea, Vomiting, PONV |
| McKenzie, 1997          | USA                                                    | NR | 24 | Hospital       | Ondansetron, Ondansetron + Dexamethasone           | Nausea, Vomiting, PONV |
| Mikawa, 1997            | Japan                                                  | NR | 24 | NR             | Granisetron, Placebo                               | Nausea, Vomiting       |
| Moens, 1997             | Belgium                                                | NR | 24 | Multi-centre   | Ondansetron, Placebo                               | Nausea, Vomiting, PONV |
| Monagle, 1997           | Australia                                              | NR | 24 | NR             | Metoclopramide, Ondansetron                        | Nausea, Vomiting       |
| Morton, 1997            | Denmark, Sweden, UK, France, Belgium, Germany, Norway. | NR | 24 | Multi-centre   | Ondansetron, Placebo                               | Nausea, Vomiting       |
| Patel, 1997             | USA                                                    | NR | 24 | Multi-centre   | Ondansetron, Placebo                               | PONV                   |
| Pitkanen, 1997          | Finland                                                | NR | 24 | NR             | Metoclopramide, Ondansetron, Placebo               | Nausea, Vomiting       |
| Polati, 1997            | Italy                                                  | NR | NR | NR             | Metoclopramide, Ondansetron, Placebo               | PONV                   |
| Purhonen, 1997          | Finland                                                | NR | 48 | Hospital       | Droperidol, Placebo, Tropisetron                   | Nausea, Vomiting, PONV |

|                                     |             |    |     |                |                                                                                   |                              |
|-------------------------------------|-------------|----|-----|----------------|-----------------------------------------------------------------------------------|------------------------------|
| Rung, 1997                          | USA         | NR | 24  | Multi-centre   | Ondansetron, Placebo                                                              | Nausea,<br>PONV              |
| Scuderi, 1997                       | USA         | NR | 24  | NR             | Droperidol,<br>Metoclopramide,<br>Ondansetron, Placebo                            | Vomiting                     |
| Shende, 1997                        | India       | NR | 24  | NR             | Metoclopramide,<br>Ondansetron, Placebo                                           | Vomiting                     |
| Sniadach, 1997                      | USA         | NR | 24  | NR             | Droperidol,<br>Ondansetron                                                        | Nausea,<br>Vomiting          |
| Splinter, 1997                      | Canada      | NR | NR  | NR             | Ondansetron                                                                       | Vomiting                     |
| Stienstra, 1997                     | Netherlands | NR | 3   | NR             | Alizapride,<br>Droperidol,<br>Ondansetron                                         | Nausea,<br>Vomiting          |
| Sun, 1997                           | USA         | NR | 24  | NR             | Ondansetron, Placebo                                                              | Nausea,<br>Vomiting          |
| Taylor, 1997                        | UK          | NR | 144 | Multi-centre   | Granisetron, Placebo                                                              | Nausea,<br>Vomiting,         |
| Ulusoy, 1997                        | Turkey      | nr | 24  | Hospital       | Ondansetron, Placebo                                                              | Nausea,<br>Vomiting          |
| Warriner, 1997                      | Canada      | NR | 24  | Multi-centre   | Dolsetron, Placebo                                                                | PONV                         |
| Ali-melkkila,<br>1996               | Finland     | NR | 24  | Hospital       | Metoclopramide,<br>Placebo, Tropisetron                                           | Nausea,<br>Vomiting          |
| Alon, 1996                          | Switzerland | NR | 24  | Hospital       | Placebo, Tropisetron                                                              | Nausea,<br>Vomiting,<br>PONV |
| Capouet, 1996                       | Belgium     | NR | 24  | Multi-centre   | Placebo, Tropisetron                                                              | Nausea,<br>Vomiting          |
| Chen, 1996                          | Hong Kong   | NR | 24  | NR             | Metoclopramide,<br>Ondansetron                                                    | Nausea,<br>Vomiting,<br>PONV |
| Cieslak, 1996                       | US          | NR | 24  | NR             | Granisetron, Placebo                                                              | Vomiting                     |
| Davies, 1996                        | UK          | NR | 119 | NR             | Ondansetron, Placebo                                                              | Nausea,<br>Vomiting,<br>PONV |
| Ercelen, 1996                       | Turkey      | NR | 24  | NR             | Droperidol,<br>Metoclopramide,<br>Ondansetron, Placebo                            | PONV                         |
| Eriksson, 1996                      | Finland     | NR | 24  | NR             | Ondansetron, Placebo                                                              | Nausea,<br>Vomiting,<br>PONV |
| Furst, 1996                         | USA         | NR | 24  | NR             | Ondansetron, Placebo                                                              | Vomiting                     |
| Gaynes, 1996 <sup>†</sup>           | USA         | NR | 8   | NR             | Ondansetron, Placebo                                                              | Nausea,<br>Vomiting          |
| Honkavaara, 1996                    | Finland     | NR | 24  | Hospital       | Ondansetron, Placebo                                                              | Nausea,<br>Vomiting,<br>PONV |
| Kaul, 1996                          | India       | NR | 24  | NR             | Metoclopramide,<br>Ondansetron, Placebo                                           | Nausea,<br>PONV              |
| Khalil, 1996                        | USA         | NR | 24  | Multi-centre   | Ondansetron, Placebo                                                              | Nausea,<br>PONV              |
| Kimya, 1996                         | Turkey      | NR | 24  | Medical center | Ondansetron, Placebo                                                              | Nausea,<br>Vomiting          |
| Koivuranta, 1996                    | Finland     | NR | 24  | NR             | Ondansetron, Placebo                                                              | Nausea,<br>Vomiting          |
| Kovac, 1996 (CR:<br>Pearman, 1994c) | USA         | NR | 24  | NR             | Ondansetron, Placebo                                                              | Nausea,<br>Vomiting,<br>PONV |
| Kumar, 1996                         | India       | NR | 24  | NR             | Metoclopramide,<br>Ondansetron                                                    | Nausea,<br>Vomiting          |
| Lawhorn, 1996                       | USA         | NR | 24  | NR             | Droperidol,<br>Metoclopramide,<br>Ondansetron,<br>Ondansetron +<br>Metoclopramide | Vomiting                     |
| Lekprasert, 1996                    | Thailand    | NR | 24  | NR             | Ondansetron, Placebo                                                              | Nausea,<br>Vomiting,<br>PONV |
| Lopez-Orlaondo,<br>1996             | Spain       | NR | 48  | NR             | Dexamethasone,<br>Ondansetron,                                                    | Nausea,<br>Vomiting,         |

|                        |                                                                                         |    |    |                |                                                                         |                              |
|------------------------|-----------------------------------------------------------------------------------------|----|----|----------------|-------------------------------------------------------------------------|------------------------------|
|                        |                                                                                         |    |    |                | Ondansetron +<br>Dexamethasone,<br>Placebo                              | PONV                         |
| Naguib, 1996           | Saudi Arabia                                                                            | NR | 24 | NR             | Granisetron,<br>Metoclopramide,<br>Ondansetron, Placebo,<br>Tropisetron | PONV                         |
| Pan, 1996              | USA                                                                                     | NR | NR | NR             | Droperidol,<br>Ondansetron, Placebo                                     | Nausea,<br>Vomiting          |
| Principi, 1996         | Italy                                                                                   | NR | 24 | NR             | Ondansetron, Placebo                                                    | Nausea,<br>Vomiting,<br>PONV |
| Pueyo, 1996            | Spain                                                                                   | NR | NR | NR             | Droperidol,<br>Ondansetron,<br>Ondansetron +<br>Droperidol, Placebo     | Nausea,<br>Vomiting,<br>PONV |
| Pugh, 1996             | UK                                                                                      | NR | 48 | NR             | Metoclopramide,<br>Ondansetron                                          | Nausea,<br>Vomiting,<br>PONV |
| Rodrigo, 1996          | Hong Kong                                                                               | NR | 24 | Hospital       | Ondansetron, Placebo                                                    | Nausea,<br>Vomiting          |
| Rose, 1996a            | USA                                                                                     | NR | 24 | NR             | Ondansetron, Placebo                                                    | Vomiting                     |
| Rose, 1996b            | USA                                                                                     | NR | NR | NR             | Metoclopramide,<br>Ondansetron, Placebo                                 | Vomiting                     |
| Stene, 1996            | USA                                                                                     | NR | 5  | Hospital       | Metoclopramide,<br>Ondansetron, Placebo                                 | Vomiting                     |
| Tang, 1996             | USA                                                                                     | NR | 24 | Medical center | Droperidol,<br>Ondansetron, Placebo                                     | Nausea,<br>Vomiting          |
| Usha, 1996             | India                                                                                   | NR | 24 | Medical center | Ondansetron, Placebo                                                    | Nausea,<br>Vomiting          |
| Van Den Berg,<br>1996a | Saudi Arabia                                                                            | NR | 24 | Hospital       | Ondansetron, Placebo,<br>Prochlorperazine                               | Nausea,<br>Vomiting,<br>PONV |
| Van Den Berg,<br>1996b | Saudi arabia                                                                            | NR | 24 | Hospital       | Ondansetron, Placebo,<br>Prochlorperazine                               | Nausea,<br>Vomiting,<br>PONV |
| Van Den Berg,<br>1996c | Saudi Arabia                                                                            | NR | 24 | Hospital       | Ondansetron, Placebo,<br>Prochlorperazine                               | Nausea,<br>Vomiting,<br>PONV |
| Watts, 1996            | New Zealand                                                                             | NR | 24 | NR             | Cyclizine,<br>Metoclopramide,<br>Ondansetron                            | PONV                         |
| Wilson, 1996           | Denmark, Finland,<br>France, Italy,<br>Netherlands, South<br>Africa,<br>Switzerland, UK | NR | 24 | Multi-centre   | Granisetron, Placebo                                                    | Nausea,<br>Vomiting,<br>PONV |
| Wrench, 1996           | UK                                                                                      | NR | 18 | Medical center | Droperidol,<br>Ondansetron,<br>Ondansetron +<br>Droperidol              | Nausea,<br>Vomiting          |
| Yilmazlar, 1996        | Turkey                                                                                  | NR | 3  | NR             | Metoclopramide,<br>Placebo, Tropisetron                                 | Vomiting                     |
| Alexander, 1995        | UK                                                                                      | NR | 24 | NR             | Droperidol,<br>Ondansetron, Placebo                                     | Nausea,<br>Vomiting,<br>PONV |
| Campbell, 1995         | USA                                                                                     | NR | 24 | Medical center | Ondansetron, Placebo                                                    | Nausea,<br>Vomiting,<br>PONV |
| Davis, 1995a           | Saudi Arabia                                                                            | NR | 24 | NR             | Droperidol,<br>Ondansetron                                              | Vomiting                     |
| Davis, 1995b           | USA                                                                                     | NR | 24 | Hospital       | Droperidol,<br>Ondansetron, Placebo                                     | Vomiting                     |
| Desilva, 1995          | USA                                                                                     | NR | 4  | NR             | Droperidol,<br>Metoclopramide,<br>Ondansetron,<br>Perphenazine, Placebo | PONV                         |
| Elhakim, 1995          | Egypt                                                                                   | NR | 24 | NR             | Ondansetron, Placebo                                                    | Nausea,<br>Vomiting,         |

|                                             |                                                                                                 |    |    |                |                                                        |                              |
|---------------------------------------------|-------------------------------------------------------------------------------------------------|----|----|----------------|--------------------------------------------------------|------------------------------|
|                                             |                                                                                                 |    |    |                |                                                        | PONV                         |
| Grond, 1995                                 | Germany                                                                                         | NR | 24 | NR             | Droperidol,<br>Ondansetron                             | Nausea,<br>Vomiting,<br>PONV |
| Litman, 1995                                | USA                                                                                             | NR | 24 | Hospital       | Droperidol,<br>Ondansetron                             | Vomiting                     |
| Mikawa, 1995                                | Japan                                                                                           | NR | 24 | NR             | Granisetron, Placebo                                   | Nausea,<br>Vomiting          |
| Pacch, 1995                                 | Australia                                                                                       | NR | 24 | Hospital       | Droperidol,<br>Ondansetron, Placebo                    | Nausea,<br>Vomiting          |
| Paxton, 1995a                               | Ireland                                                                                         | NR | 24 | NR             | Droperidol,<br>Ondansetron, Placebo                    | Vomiting                     |
| Paxton, 1995b                               | Ireland                                                                                         | NR | 48 | NR             | Droperidol,<br>Metoclopramide,<br>Ondansetron, Placebo | Nausea,<br>Vomiting          |
| Splinter, 1995a                             | Canada                                                                                          | NR | 48 | NR             | Ondansetron, Placebo                                   | Vomiting                     |
| Splinter, 1995b                             | Canada                                                                                          | NR | 24 | NR             | Droperidol,<br>Ondansetron                             | Vomiting                     |
| Watcha, 1995                                | USA                                                                                             | NR | 24 | Medical center | Ondansetron, Placebo                                   | Vomiting                     |
| Furst, 1994                                 | USA                                                                                             | NR | 24 | NR             | Droperidol,<br>Metoclopramide,<br>Ondansetron, Placebo | Vomiting                     |
| Gan, 1994                                   | UK                                                                                              | NR | 24 | NR             | Droperidol,<br>Ondansetron, Placebo                    | Nausea,<br>Vomiting,<br>PONV |
| Kaufmann, 1994                              | Switzerland, USA                                                                                | NR | 35 | NR             | Droperidol,<br>Metoclopramide,<br>Placebo, Tropisetron | PONV                         |
| Khalil, 1994 (CR:<br>Pearman, 1994b)        | USA                                                                                             | NR | 24 | Multi-centre   | Ondansetron, Placebo                                   | PONV                         |
| Litman, 1994                                | USA                                                                                             | NR | 48 | NR             | Ondansetron, Placebo                                   | Vomiting                     |
| Malins, 1994                                | UK                                                                                              | NR | 48 | NR             | Metoclopramide,<br>Ondansetron, Placebo                | Nausea,<br>Vomiting,<br>PONV |
| McKenzie, 1994                              | USA                                                                                             | NR | 24 | NR             | Ondansetron,<br>Ondansetron +<br>Dexamethasone         | Vomiting,<br>PONV            |
| Rodrigo, 1994                               | Hong Kong                                                                                       | NR | 24 | NR             | Ondansetron, Placebo                                   | Nausea,<br>Vomiting          |
| Rose, 1994                                  | USA                                                                                             | NR | 24 | NR             | Metoclopramide,<br>Ondansetron, Placebo                | Vomiting                     |
| Suen, 1994                                  | Hong Kong                                                                                       | NR | 24 | Hospital       | Ondansetron, Placebo                                   | Nausea,<br>Vomiting,<br>PONV |
| Ummenhofer,<br>1994                         | Switzerland                                                                                     | NR | 24 | Hospital       | Ondansetron, Placebo                                   | PONV                         |
| Volpe, 1994                                 | Italy                                                                                           | NR | 24 | NR             | Ondansetron, Placebo                                   | Nausea,<br>Vomiting,<br>PONV |
| Dupeyron, 1993                              | Belgium,<br>Denmark, France<br>Netherlands,<br>Ireland, Sweden,<br>UK, South Africa,<br>France, | NR | 24 | NR             | Ondansetron, Placebo                                   | Nausea,<br>Vomiting,<br>PONV |
| Helmerts, 1993                              |                                                                                                 | NR | 24 | NR             | Ondansetron, Placebo                                   | Nausea,<br>Vomiting          |
| McKenzie, 1993b<br>(CR: Dershwitz,<br>1992) | USA                                                                                             | NR | 24 | Multi-centre   | Ondansetron, Placebo                                   | Nausea,<br>PONV              |
| Raphael, 1993                               | UK                                                                                              | NR | 24 | NR             | Metoclopramide,<br>Ondansetron                         | Nausea,<br>Vomiting,<br>PONV |
| Sung, 1993                                  | USA                                                                                             | NR | 24 | Multi-centre   | Ondansetron, Placebo                                   | Nausea,<br>Vomiting,<br>PONV |
| Zomers, 1993                                | Netherlands                                                                                     | NR | 24 | NR             | Placebo, Tropisetron                                   | Nausea,<br>Vomiting          |
| Alon, 1992                                  | Switzerland                                                                                     | NR | 3  | Hospital       | Droperidol,                                            | Nausea,                      |

|                                                             |                                     |    |     |              |                                |                     |
|-------------------------------------------------------------|-------------------------------------|----|-----|--------------|--------------------------------|---------------------|
|                                                             |                                     |    |     |              | Metoclopramide,<br>Ondansetron | Vomiting,<br>PONV   |
| Du Pen, 1992<br>(CR: Scuderi,<br>1993)                      | USA                                 | NR | 24  | Multi-centre | Ondansetron, Placebo           | Nausea,<br>PONV     |
| Kenny, 1992                                                 | UK, Netherlands,<br>Germany, Norway | NR | 168 | Multi-centre | Ondansetron, Placebo           | Nausea              |
| Kovac, 1992<br>(CRs: McKenzie,<br>1993a; Pearman,<br>1994a) | USA                                 | NR | 24  | Multi-centre | Ondansetron, Placebo           | Nausea,<br>Vomiting |
| Bodner, 1991                                                | USA                                 | NR | 24  | Hospital     | Ondansetron, Placebo           | Nausea,<br>Vomiting |
| Larijani, 1991                                              | USA                                 | NR | 24  | NR           | Ondansetron, Placebo           | Nausea,<br>PONV     |
| Leeser, 1991                                                | Netherlands                         | NR | 168 | Hospital     | Ondansetron, Placebo           | Nausea,<br>Vomiting |

*Non-randomized clinical trials (n=5)*

|               |          |                             |        |                   |                                            |                              |
|---------------|----------|-----------------------------|--------|-------------------|--------------------------------------------|------------------------------|
| Stamer, 2011  | Germany  | NR                          | 48     | NR                | Ondansetron                                | PONV                         |
| Rabbani, 2010 | Pakistan | January 2009 -<br>June 2009 | 119.28 | Hospital          | Dexamethasone,<br>Ondansetron              | PONV                         |
| Kim, 2007     | Korea    | NR                          | 24     | NR                | Ondansetron +<br>Dexamethasone,<br>Placebo | Nausea,<br>Vomiting,<br>PONV |
| Biedler, 2004 | Germany  | NR                          | 24     | Medical<br>center | Ondansetron, Placebo                       | Nausea,<br>Vomiting,<br>PONV |
| Manani, 1996  | Italy    | NR                          | 24     | NR                | Droperidol,<br>Ondansetron, Placebo        | PONV                         |

*Controlled before-after studies (n=1)*

|              |     |    |    |                   |                      |                   |
|--------------|-----|----|----|-------------------|----------------------|-------------------|
| Wagner, 2007 | USA | NR | 24 | Medical<br>center | Ondansetron, Placebo | Vomiting,<br>PONV |
|--------------|-----|----|----|-------------------|----------------------|-------------------|

*Cohort studies (n=9)*

|                |         |                               |       |                   |                                                                              |                              |
|----------------|---------|-------------------------------|-------|-------------------|------------------------------------------------------------------------------|------------------------------|
| Shakeel, 2012  | UK      | 2000 - 2009                   | 24    | Hospital          | Dexamethasone,<br>Ondansetron,<br>Ondansetron +<br>Dexamethasone,<br>Placebo | Vomiting                     |
| Chen, 2011     | Taiwan  | 2000 - 2009                   | 24    | Hospital          | Ondansetron, Placebo                                                         | Nausea,<br>Vomiting,<br>PONV |
| Eryilmaz, 2008 | Turkey  | NR                            | 24    | NR                | Metoclopramide,<br>Ondansetron                                               | PONV                         |
| Habib, 2007    | USA     | April 2001 - June<br>2005     | NR    | Medical<br>center | Ondansetron,<br>Promethazine                                                 | PONV                         |
| Flynn, 2006    | USA     | January 1995 -<br>June 2001   | 56952 | NR                | Droperidol,<br>Ondansetron, Placebo                                          | Vomiting                     |
| Piwko, 2005    | Canada  | 1996 - 2001                   | 17808 | Hospital          | Ondansetron,<br>Dimenhydrinate                                               | Vomiting                     |
| Wang, 2005     | USA     | March 2003 -<br>February 2004 | NR    | Hospital          | Dolsetron,<br>Granisetron,<br>Ondansetron                                    | PONV                         |
| Walker, 2001   | USA     | October 1998 -<br>March 1999  | 24    | Medical<br>center | Dolsetron,<br>Ondansetron                                                    | Nausea,<br>Vomiting,<br>PONV |
| O'Brien, 2000  | Ireland | NR                            | NR    | NR                | Ondansetron,<br>Promethazine                                                 | Vomiting                     |

**Note:** †Unpublished data (Gurha, 2012; Apfel, 2011; White, 2005; Samra, 2003; Gaynes, 1996).

**Abbreviations:** CR, companion report; NR, not reported; PONV, Post-operative nausea and vomiting; UK, United Kingdom; USA United States of America.



**Appendix 5. Frequencies for specific drugs and drug combinations**

| <i>Intervention/ Comparator:</i> | <b>% of arms (n=1260)</b> | <b>% of studies (n=444)</b> |
|----------------------------------|---------------------------|-----------------------------|
| Ondansetron                      | 31.51                     | 75.68                       |
| Placebo/no treatment             | 23.41                     | 65.99                       |
| Metoclopramide                   | 5.63                      | 15.54                       |
| Droperidol                       | 5.40                      | 15.09                       |
| Granisetron                      | 5.71                      | 12.84                       |
| Ondansetron + Dexamethasone      | 4.44                      | 10.36                       |
| Dexamethasone                    | 3.25                      | 9.01                        |
| Tropisetron                      | 3.49                      | 7.88                        |
| Dolasetron                       | 5.08                      | 7.43                        |
| Granisetron + Dexamethasone      | 1.19                      | 3.38                        |
| Palonosetron                     | 2.14                      | 3.15                        |
| Ondansetron + Droperidol         | 0.79                      | 2.25                        |
| Ramosetron                       | 1.03                      | 2.25                        |
| Dimenhydrinate                   | 0.48                      | 1.35                        |
| Promethazine                     | 0.48                      | 1.35                        |
| Cyclizine                        | 0.40                      | 1.13                        |
| Haloperidol                      | 0.40                      | 1.13                        |
| Metoclopramide + Dexamethasone   | 0.40                      | 1.13                        |
| Ondansetron + Metoclopramide     | 0.56                      | 1.13                        |
| Prochlorperazine                 | 0.63                      | 1.13                        |
| Dolasetron + Dexamethasone       | 0.24                      | 0.68                        |
| Granisetron + Droperidol         | 0.24                      | 0.68                        |
| Palonosetron + Dexamethasone     | 0.32                      | 0.68                        |
| Alizapride                       | 0.16                      | 0.45                        |
| Aprepitant                       | 0.32                      | 0.45                        |
| Droperidol + Dexamethasone       | 0.16                      | 0.45                        |
| Haloperidol + Dexamethasone      | 0.16                      | 0.45                        |
| Perphenazine                     | 0.16                      | 0.45                        |
| Scopolamine                      | 0.16                      | 0.45                        |
| Tropisetron + Dexamethasone      | 0.16                      | 0.45                        |
| Azasetron                        | 0.08                      | 0.23                        |
| Casopitant                       | 0.08                      | 0.23                        |
| CP-122, 721                      | 0.08                      | 0.23                        |
| Dolasetron + Droperidol          | 0.08                      | 0.23                        |
| Granisetron + Cyclizine          | 0.08                      | 0.23                        |
| Granisetron + Promethazine       | 0.08                      | 0.23                        |
| Mirtazapine                      | 0.08                      | 0.23                        |
| Ondansetron + Casopitant         | 0.24                      | 0.23                        |
| Ondansetron + CP-122, 721        | 0.08                      | 0.23                        |
| Ondansetron + Cyclizine          | 0.08                      | 0.23                        |
| Ondansetron + Dimenhydrinate     | 0.08                      | 0.23                        |
| Ondansetron + Haloperidol        | 0.08                      | 0.23                        |
| Ondansetron + Prochlorperazine   | 0.08                      | 0.23                        |
| Ramosetron + Dexamethasone       | 0.08                      | 0.23                        |
| Rolapitant                       | 0.32                      | 0.23                        |

## Appendix 6. Patient characteristics

| Author, year                              | Sample size | Age Category      | % female | ASA status     | Surgery type                                          | H/o motion sickness | H/o PONV | Comorbidities                                          |
|-------------------------------------------|-------------|-------------------|----------|----------------|-------------------------------------------------------|---------------------|----------|--------------------------------------------------------|
| <i>Randomized clinical trials (n=429)</i> |             |                   |          |                |                                                       |                     |          |                                                        |
| Browning, 2013                            | 118         | Adults            | NR       | I or II        | Obstetrics & Gynaecological                           | NR                  | NR       | Mental health                                          |
| Aleyasin, 2012                            | 120         | Adults            | 100      | NR             | Breast                                                | NR                  | NR       | NR                                                     |
| Blitz, 2012                               | 118         | Adults            | 84       | I or II        | Miscellaneous                                         | NR                  | NR       | NR                                                     |
| Choi, 2012                                | 120         | Adults            | 100      | I or II        | Orthopaedic                                           | YES                 | YES      | NR                                                     |
| de Orange, 2012                           | 129         | Children          | 24       | I or II        | Miscellaneous                                         | NR                  | YES      | NR                                                     |
| Eidi, 2012                                | 219         | Adults            | 72       | I or II        | Ear, nose and larynx                                  | NR                  | NR       | NR                                                     |
| Gurha, 2012 <sup>†</sup>                  | 30          | Adults & Elderly  | NR       | NR             | Miscellaneous                                         | NR                  | NR       | NR                                                     |
| Koh, 2012                                 | 119         | Adults & Elderly  | 89       | NR             | Orthopaedic                                           | NR                  | NR       | Osteoarthritis                                         |
| Lahsaei, 2012                             | 300         | Adults            | NR       | I or II        | Orthopaedic                                           | NR                  | NR       | NR                                                     |
| Madenoglu, 2012                           | 90          | Adults & Elderly  | 48       | I or II or III | Neurological                                          | NR                  | NR       | NR                                                     |
| Moon, 2012                                | 100         | Adults            | 100      | I or II        | Endocrine                                             | YES                 | YES      | NR                                                     |
| Park JW, 2012                             | 84          | Adults            | 100      | I or II        | Miscellaneous                                         | YES                 | YES      | NR                                                     |
| Wang, 2012                                | 130         | Adults            | 100      | I or II        | Miscellaneous                                         | YES                 | YES      | NR                                                     |
| Ahmed, 2011                               | 80          | Adults            | 100      | I or II        | Breast                                                | NR                  | NR       | NR                                                     |
| Apfel, 2011 <sup>†</sup>                  | 48          | NR                | NR       | NR             | Miscellaneous                                         | NR                  | YES      | NR                                                     |
| Asl, 2011                                 | 90          | Adults            | 100      | I or II        | Obstetrics & Gynaecological                           | NR                  | NR       | NR                                                     |
| Bajwa, 2011                               | 60          | Adults            | 100      | I or II        | Obstetrics & Gynaecological                           | NR                  | NR       | NR                                                     |
| Basu, 2011                                | 75          | Adults            | 67       | I or II        | Otolaryngological                                     | YES                 | YES      | NR                                                     |
| Bhattarai, 2011                           | 150         | Children          | 49       | I              | Eye                                                   | NR                  | NR       | NR                                                     |
| Bicer, 2011                               | 100         | Adults            | 83       | I or II        | Gastrointestinal                                      | NR                  | NR       | NR                                                     |
| D'Souza, 2011                             | 92          | Adults            | 100      | I or II        | Obstetrics & Gynaecological                           | NR                  | NR       | NR                                                     |
| Ekinci, 2011                              | 100         | Adults            | 100      | I or II or III | Obstetrics & Gynaecological                           | NR                  | NR       | NR                                                     |
| El-deeb, 2011a                            | 80          | Adults            | NR       | I or II        | Endocrine                                             | NR                  | NR       | NR                                                     |
| El-deeb, 2011b                            | 160         | Adults            | 100      | I or II        | Obstetrics & Gynaecological                           | NR                  | NR       | NR                                                     |
| El-deeb, 2011c                            | 300         | Adults            | 100      | I or II        | Obstetrics & Gynaecological                           | NR                  | NR       | NR                                                     |
| Gan, 2011                                 | 619         | Adults            | 100      | I or II or III | Miscellaneous                                         | YES                 | YES      | NR                                                     |
| Islam, 2011                               | 100         | Adults & Children | NR       | I or II        | Otolaryngological                                     | NR                  | NR       | NR                                                     |
| Khan, 2011                                | 60          | Adults            | 100      | I or II        | Gastrointestinal                                      | NR                  | NR       | NR                                                     |
| Lee, 2011                                 | 120         | Adults            | 100      | I or II        | Obstetrics & Gynaecological                           | YES                 | YES      | NR                                                     |
| Metaxari, 2011                            | 203         | Adults            | 100      | I or II        | Endocrine                                             | YES                 | YES      | NR                                                     |
| Park, 2011                                | 90          | Adults            | 100      | I or II        | Obstetrics & Gynaecological                           | YES                 | YES      | NR                                                     |
| Ryu, 2011                                 | 124         | Adults            | 54       | I or II        | Gastrointestinal                                      | NR                  | NR       | Cardiovascular, liver disease                          |
| Safae, 2011                               | 64          | Adults & Elderly  | 100      | NR             | Gastrointestinal                                      | YES                 | NR       | Cardiovascular, diabetes, asthma, disorders of the ear |
| Sahoo, 2011                               | 52          | Adults            | 100      | I              | Obstetrics & Gynaecological                           | NR                  | NR       | NR                                                     |
| Singh, 2011                               | 50          | Adults            | 42       | I or II        | Miscellaneous                                         | NR                  | NR       | NR                                                     |
| Song, 2011                                | 123         | Adults            | 39       | I or II        | Breast                                                | YES                 | YES      | Cardiovascular, cancer, diabetes                       |
| Srivastava, 2011                          | 75          | Adults            | 86       | I or II        | Gastrointestinal                                      | NR                  | NR       | NR                                                     |
| Talesh, 2011                              | 100         | Adults            | NR       | NR             | General dentistry, oral and maxillofacial surgery and | NR                  | NR       | NR                                                     |



| orthodontics                                      |     |                   |      |                |                                                       |     |     |                                            |
|---------------------------------------------------|-----|-------------------|------|----------------|-------------------------------------------------------|-----|-----|--------------------------------------------|
| Vale, 2011                                        | 40  | Adults & Elderly  | 55   | I or II or III | Miscellaneous                                         | NR  | NR  | NR                                         |
| Akhtar, 2010                                      | 130 | Adults            | 100  | I or II        | Gastrointestinal                                      | NR  | NR  | NR                                         |
| Alghanem, 2010                                    | 180 | Adults & Elderly  | 81   | I or II        | Gastrointestinal                                      | NR  | YES | Cardiovascular, diabetes                   |
| Bhattachajee, 2010                                | 60  | Adults            | 100  | I or II        | Gastrointestinal                                      | NR  | NR  | NR                                         |
| Bilgin, 2010                                      | 160 | Adults            | 100  | I or II        | Obstetrics & Gynaecological                           | NR  | NR  | NR                                         |
| Choi, 2010                                        | 279 | Adults & Elderly  | 39   | NR             | Cardiovascular                                        | YES | YES | NR                                         |
| Dabbous, 2010                                     | 84  | Adults            | 50   | I or II        | Miscellaneous                                         | YES | YES | NR                                         |
| Ebrahim Soltani, 2010 (CR: Ebrahim Soltani, 2011) | 150 | Adults & Children | 48   | I or II        | Eye                                                   | NR  | NR  | NR                                         |
| Hahm, 2010                                        | 84  | Adults & Elderly  | 100  | I or II or III | Orthopaedic                                           | NR  | NR  | NR                                         |
| Huh, 2010                                         | 60  | Adults            | 100  | I or II        | Obstetrics & Gynaecological                           | NR  | NR  | NR                                         |
| Jee, 2010                                         | 100 | Adults            | 100  | I or II        | Obstetrics & Gynaecological                           | YES | YES | NR                                         |
| Jokela, 2010                                      | 80  | Adults            | 100  | I or II or III | Obstetrics & Gynaecological                           | YES | YES | NR                                         |
| Mishra, 2010                                      | 40  | Adults & Children | 46   | I or II        | Miscellaneous                                         | NR  | NR  | NR                                         |
| Omar, 2010                                        | 40  | Adults            | 52   | I or II        | Miscellaneous                                         | NR  | NR  | NR                                         |
| Rauers, 2010                                      | 179 | Adults & Elderly  | 35   | I or II or III | Miscellaneous                                         | YES | YES | Cancer<br>Cardiovascular,<br>liver disease |
| Ryu, 2010                                         | 120 | Adults            | 50   | I or II        | Gastrointestinal                                      | NR  | NR  | NR                                         |
| Shakya, 2010                                      | 80  | Adults            | 63   | I or II        | Miscellaneous                                         | NR  | NR  | NR                                         |
| Singla, 2010                                      | 702 | Adults            | 100  | NR             | Miscellaneous                                         | YES | YES | NR                                         |
| Tan, 2010                                         | 80  | Adults            | 100  | I or II        | Obstetrics & Gynaecological                           | NR  | NR  | NR                                         |
| Yun, 2010                                         | 98  | Adults            | 100  | I or II        | Obstetrics & Gynaecological                           | NR  | NR  | NR                                         |
| Farouk, 2009                                      | 30  | Adults            | 36   | I or II        | Orthopaedic                                           | NR  | NR  | NR                                         |
| Feng, 2009                                        | 192 | Adults            | 74   | I or II        | Gastrointestinal                                      | YES | YES | NR                                         |
| Gan, 2009                                         | 138 | Adults            | 100  | I or II or III | Obstetrics & Gynaecological                           | YES | YES | NR                                         |
| Gandhi, 2009                                      | 150 | Adults            | 97   | I or II        | Multiple types included                               | NR  | NR  | NR                                         |
| Grover, 2009                                      | 103 | Adults            | 74   | I or II        | Gastrointestinal                                      | NR  | NR  | NR                                         |
| Jain, 2009                                        | 87  | Adults            | 29.9 | I or II        | Neurological                                          | NR  | NR  | NR                                         |
| Jellish, 2009                                     | 100 | Adults            | 84   | I or II or III | Miscellaneous                                         | YES | YES | NR                                         |
| Kim, 2009                                         | 162 | Adults & Elderly  | 100  | NR             | Obstetrics & Gynaecological                           | YES | YES | NR                                         |
| Riad, 2009                                        | 100 | Children          | 48   | I or II        | Eye                                                   | NR  | NR  | NR                                         |
| Rosow, 2009                                       | 244 | Adults & Elderly  | 66   | I or II or III | Miscellaneous                                         | NR  | NR  | NR                                         |
| Aghadavoudi, 2008                                 | 120 | Adults            | 47   | II or III      | Cardiac                                               | NR  | YES | NR                                         |
| Bano, 2008                                        | 97  | Adults            | 87   | I or II        | Gastrointestinal                                      | NR  | NR  | NR                                         |
| Bhatia, 2008                                      | 120 | Adults            | 100  | I or II        | Obstetrics & Gynaecological                           | NR  | NR  | NR                                         |
| Candiotti, 2008                                   | 546 | Adults & Elderly  | 95   | I or II or III | Miscellaneous                                         | YES | YES | NR                                         |
| Choi, 2008                                        | 94  | Adults            | 100  | NR             | Orthopaedic                                           | YES | YES | NR                                         |
| Contreras-Dominguez, 2008                         | 150 | Adults            | 49   | I or II        | Gastrointestinal                                      | NR  | YES | NR                                         |
| Cruz, 2008                                        | 372 | Adults            | 98   | NR             | Miscellaneous                                         | NR  | NR  | NR                                         |
| Davis, 2008                                       | 200 | Children          | 54   | I or II        | General dentistry, oral and maxillofacial surgery and | YES | YES | NR                                         |

| orthodontics     |     |                   |     |                |                                                                    |     |     |    |
|------------------|-----|-------------------|-----|----------------|--------------------------------------------------------------------|-----|-----|----|
| Erhan, 2008      | 80  | Adults & Elderly  | 76  | I or II        | Gastrointestinal                                                   | NR  | NR  | NR |
| Gautam, 2008     | 142 | Adults            | 90  | I or II        | Gastrointestinal                                                   | YES | YES | NR |
| Gupta, 2008      | 60  | Adults            | 100 | I or II        | Gastrointestinal                                                   | NR  | NR  | NR |
| Kaki, 2008       | 75  | Adults            | 70  | I or II        | Gastrointestinal                                                   | NR  | NR  | NR |
| Kovac, 2008      | 544 | Adults            | 100 | I or II or III | Miscellaneous                                                      | YES | YES | NR |
| Krobbuaban, 2008 | 380 | Adults            | 100 | I or II        | Obstetrics & Gynaecological                                        | YES | YES | NR |
| Lee, 2008        | 236 | Adults            | 100 | I or II        | Breast                                                             | NR  | NR  | NR |
| Ng, 2008         | 81  | Adults & Elderly  | 6   | I or II        | Gastrointestinal                                                   | NR  | NR  | NR |
| Olatosi, 2008    | 75  | Adults            | 100 | I or II or III | Obstetrics & Gynaecological                                        | NR  | NR  | NR |
| Pan, 2008        | 60  | Adults            | 100 | I or II        | Obstetrics & Gynaecological                                        | YES | YES | NR |
| Piper, 2008      | 83  | Adults            | 56  | I or II        | General dentistry, oral and maxillofacial surgery and orthodontics | YES | YES | NR |
| Said-Ahmed, 2008 | 50  | Adults            | 100 | I or II        | Obstetrics & Gynaecological                                        | NR  | NR  | NR |
| Sajedi, 2008     | 66  | Adults            | 35  | I or II        | Orthopaedic                                                        | NR  | NR  | NR |
| Sakellaris, 2008 | 164 | Children          | NR  | I or II        | Miscellaneous                                                      | NR  | NR  | NR |
| Schnaider, 2008  | 70  | Adults            | 100 | I or II        | Obstetrics & Gynaecological                                        | NR  | NR  | NR |
| Aouad, 2007      | 89  | Adults            | 100 | I or II        | Obstetrics & Gynaecological                                        | YES | YES | NR |
| Balki, 2007      | 176 | Adults            | 100 | I or II        | Obstetrics & Gynaecological                                        | NR  | NR  | NR |
| Bestas, 2007     | 90  | Adults            | 77  | I or II        | Gastrointestinal                                                   | NR  | NR  | NR |
| Bhatnagar, 2007  | 90  | Adults            | 100 | I or II        | Breast                                                             | YES | YES | NR |
| Bolton, 2007     | 557 | Children          | 56  | I or II or III | General dentistry, oral and maxillofacial surgery and orthodontics | NR  | NR  | NR |
| Boonmak, 2007    | 160 | Adults            | 66  | I or II        | Miscellaneous                                                      | NR  | NR  | NR |
| Candiotti, 2007  | 88  | Adults            | 100 | I or II        | Miscellaneous                                                      | YES | YES | NR |
| Diemunsch, 2007  | 892 | Adults & Elderly  | 91  | I or II or III | Miscellaneous                                                      | YES | YES | NR |
| Gan, 2007        | 766 | Adults & Elderly  | 94  | I or II or III | Miscellaneous                                                      | YES | YES | NR |
| Gombar, 2007     | 90  | Children          | 43  | I or II        | Otolaryngological                                                  | NR  | NR  | NR |
| Gulhas, 2007     | 72  | Adults            | 100 | I or II        | Obstetrics & Gynaecological                                        | NR  | NR  | NR |
| Han, 2007        | 80  | Adults            | 100 | I              | Obstetrics & Gynaecological                                        | NR  | NR  | NR |
| Harnett, 2007    | 240 | Adults            | 100 | I              | Obstetrics & Gynaecological                                        | NR  | NR  | NR |
| Kushwaha, 2007   | 125 | Adults & Children | 50  | I or II        | Otolaryngological                                                  | NR  | NR  | NR |
| Lee, 2007        | 86  | Adults            | 100 | I or II        | Obstetrics & Gynaecological                                        | YES | YES | NR |
| Moussa, 2007     | 120 | Adults            | 70  | II or III      | Gastrointestinal                                                   | YES | YES | NR |
| Oksuz, 2007      | 75  | Adults & Elderly  | 65  | I or II        | Gastrointestinal                                                   | NR  | YES | NR |
| Paech, 2007      | 614 | Adults            | 100 | NR             | Obstetrics & Gynaecological                                        | NR  | YES | NR |
| Rusch, 2007      | 228 | Adults & Elderly  | 49  | I or II or III | Miscellaneous                                                      | NR  | YES | NR |
| Sagir, 2007      | 80  | Adults            | 0.7 | I or II        | Urological                                                         | NR  | NR  | NR |
| Sandhu, 2007     | 80  | Adults            | 71  | I or II        | Gastrointestinal                                                   | NR  | NR  | NR |

|                         |     |                  |     |                |                                                                    |     |     |         |
|-------------------------|-----|------------------|-----|----------------|--------------------------------------------------------------------|-----|-----|---------|
| Sarkar, 2007            | 60  | Adults           | 100 | I or II        | Obstetrics & Gynaecological                                        | NR  | NR  | NR      |
| Sharma, 2007            | 40  | Adults           | 100 | I or II        | Gastrointestinal                                                   | NR  | NR  | NR      |
| Siddik-Sayyid, 2007     | 129 | Adults           | 100 | I or II        | Obstetrics & Gynaecological                                        | NR  | NR  | Obesity |
| Sodhi, 2007             | 90  | Adults           | 100 | I or II        | Breast                                                             | NR  | NR  | NR      |
| Sriraman, 2007          | 100 | Adults           | 100 | I or II        | Obstetrics & Gynaecological                                        | YES | YES | NR      |
| Subramaniam, 2007       | 75  | Children         | 30  | II or III      | Neurological                                                       | NR  | NR  | NR      |
| Teran, 2007             | 35  | Adults           | 100 | I or II        | Miscellaneous                                                      | YES | YES | NR      |
| White, 2007             | 66  | Adults           | 85  | I or II or III | Miscellaneous                                                      | YES | YES | NR      |
| Wig, 2007               | 70  | Adults           | 40  | NR             | Neurological                                                       | YES | YES | NR      |
| Akin, 2006              | 70  | Adults & Elderly | 83  | NR             | Endocrine                                                          | NR  | NR  | NR      |
| Birmingham, 2006        | 100 | Adults           | 82  | I or II        | Miscellaneous                                                      | NR  | NR  | NR      |
| Bridge, 2006            | 194 | Adults           | 100 | NR             | Miscellaneous                                                      | NR  | NR  | NR      |
| Chan, 2006              | 394 | Adults           | 100 | I or II        | Obstetrics & Gynaecological                                        | YES | YES | NR      |
| Eberhart, 2006          | 310 | Adults           | 72  | I or II or III | Miscellaneous                                                      | NR  | YES | NR      |
| Gunter, 2006            | 240 | Children         | NR  | I or II        | General dentistry, oral and maxillofacial surgery and orthodontics | NR  | NR  | NR      |
| Gupta, 2006             | 200 | Adults & Elderly | 67  | I or II        | Gastrointestinal                                                   | NR  | NR  | NR      |
| Isik, 2006              | 60  | Adults           | 48  | I or II        | General dentistry, oral and maxillofacial surgery and orthodontics | NR  | NR  | NR      |
| Janicki, 2006           | 150 | Adults           | 84  | I or II or III | Miscellaneous                                                      | NR  | NR  | NR      |
| Jellish, 2006           | 120 | Adults & Elderly | 44  | I or II or III | Neurological                                                       | NR  | YES | NR      |
| Johns, 2006             | 960 | Adults           | 100 | NR             | Obstetrics & Gynaecological                                        | YES | YES | NR      |
| Khan, 2006              | 180 | Adults           | NR  | I or II        | Gastrointestinal                                                   | NR  | NR  | NR      |
| Kolm, 2006              | 100 | All groups       | NR  | I or II        | Miscellaneous                                                      | NR  | NR  | NR      |
| Leksowski, 2006         | 210 | Adults & Elderly | 75  | I or II        | Gastrointestinal                                                   | YES | YES | NR      |
| Paranhos de Abreu, 2006 | 100 | Adults           | 100 | I or II        | Obstetrics & Gynaecological                                        | NR  | NR  | NR      |
| Peixoto, 2006           | 120 | Adults           | 100 | I or II        | Obstetrics & Gynaecological                                        | NR  | NR  | NR      |
| Purhonen, 2006a         | 56  | Adults & Elderly | 100 | I or II or III | Breast                                                             | YES | YES | NR      |
| Purhonen, 2006b         | 100 | Adults           | 100 | I or II        | Obstetrics & Gynaecological                                        | YES | YES | NR      |
| Sarvela, 2006           | 87  | Adults           | 100 | NR             | Obstetrics & Gynaecological                                        | NR  | NR  | NR      |
| Tosun, 2006             | 125 | Children         | 49  | I or II        | Eye                                                                | NR  | NR  | NR      |
| Tseng, 2006             | 140 | Adults           | 100 | I or II        | Obstetrics & Gynaecological                                        | NR  | YES | NR      |
| Veneziani, 2006         | 100 | Adults & Elderly | 100 | I or II        | Obstetrics & Gynaecological                                        | NR  | NR  | NR      |
| White, 2006             | 205 | Adults           | 88  | NR             | Miscellaneous                                                      | YES | YES | NR      |
| Cohen, 2005             | 62  | Children         | 56  | I or II        | General dentistry, oral and maxillofacial surgery and orthodontics | NR  | NR  | NR      |
| D'Angelo, 2005          | 121 | Adults           | 100 | I or II or III | Obstetrics & Gynaecological                                        | YES | YES | NR      |

|                                   |     |                     |     |                   |                                                                                |     |     |    |
|-----------------------------------|-----|---------------------|-----|-------------------|--------------------------------------------------------------------------------|-----|-----|----|
| Demiraran, 2005                   | 90  | Adults              | 100 | I or II<br>or III | Obstetrics &<br>Gynaecological                                                 | NR  | NR  | NR |
| Gan, 2005                         | 176 | Adults              | 100 | I or II<br>or III | Obstetrics &<br>Gynaecological                                                 | YES | YES | NR |
| Hartsell, 2005                    | 60  | Adults &<br>Elderly | 63  | I or II<br>or III | Otolaryngological                                                              | NR  | NR  | NR |
| Iatrou, 2005                      | 105 | Adults &<br>Elderly | 46  | I or II<br>or III | Miscellaneous                                                                  | NR  | NR  | NR |
| Kabalak, 2005                     | 60  | Children            | NR  | I or II           | General dentistry,<br>oral and<br>maxillofacial<br>surgery and<br>orthodontics | NR  | NR  | NR |
| Khan, 2005                        | 60  | Adults              | 100 | I or II           | Obstetrics &<br>Gynaecological                                                 | NR  | NR  | NR |
| Kocamanoglu,<br>2005              | 150 | Adults              | 100 | I or II           | Obstetrics &<br>Gynaecological                                                 | YES | YES | NR |
| Kontrimaviciute,<br>2005          | 34  | Adults              | 100 | I or II           | Obstetrics &<br>Gynaecological                                                 | NR  | YES | NR |
| Misra, 2005                       | 79  | Adults              | 67  | I or II           | Otolaryngological                                                              | YES | YES | NR |
| Pirat, 2005                       | 150 | Adults              | 0   | I                 | Miscellaneous                                                                  | NR  | NR  | NR |
| Treschan, 2005                    | 142 | All<br>groups       | 56  | I or II           | Eye                                                                            | YES | YES | NR |
| White, 2005 <sup>†</sup>          | 372 | NR                  | 100 | NR                | Obstetrics &<br>Gynaecological                                                 | NR  | NR  | NR |
| Alkaissi, 2004                    | 495 | Adults              | 100 | I or II<br>or III | Obstetrics &<br>Gynaecological                                                 | YES | YES | NR |
| Apfel, 2004 (CR:<br>Jokela, 2009) | 260 | Adults              | 81  | NR                | Miscellaneous                                                                  | YES | YES | NR |
| Barbone, 2004                     | 141 | All<br>groups       | 69  | I or II<br>or III | Miscellaneous                                                                  | NR  | NR  | NR |
| Barbosa, 2004                     | 60  | Adults &<br>Elderly | 85  | NR                | Miscellaneous                                                                  | NR  | YES | NR |
| Bhardwaj, 2004                    | 100 | Children            | 47  | I or II           | Eye                                                                            | NR  | NR  | NR |
| Binstock, 2004                    | 101 | Children            | 42  | I or II           | Miscellaneous                                                                  | NR  | NR  | NR |
| Browning, 2004                    | 212 | Adults &<br>Elderly | 100 | I or II           | Obstetrics &<br>Gynaecological                                                 | NR  | NR  | NR |
| Celiker, 2004                     | 102 | Children            | 33  | NR                | General dentistry,<br>oral and<br>maxillofacial<br>surgery and<br>orthodontics | NR  | NR  | NR |
| Dua, 2004                         | 60  | Adults &<br>Elderly | 100 | I or II           | Breast                                                                         | NR  | YES | NR |
| Eberhart, 2004                    | 304 | Adults &<br>Elderly | 52  | I or II<br>or III | Eye                                                                            | YES | YES | NR |
| Gan, 2004                         | 49  | Adults              | 100 | I or II           | Breast                                                                         | YES | YES | NR |
| Han, 2004                         | 350 | Adults &<br>Elderly | 0   | NR                | Miscellaneous                                                                  | NR  | NR  | NR |
| Hanaoka, 2004                     | 315 | Adults              | 95  | I or II<br>or III | Miscellaneous                                                                  | YES | NR  | NR |
| Meyer, 2004                       | 92  | Adults &<br>Elderly | 76  | NR                | Miscellaneous                                                                  | NR  | YES | NR |
| Panda, 2004                       | 100 | Adults              | NR  | I or II           | Otolaryngological                                                              | NR  | NR  | NR |
| Samakarndi, 2004                  | 80  | Children            | 49  | I or II           | Eye                                                                            | NR  | NR  | NR |
| Sinha, 2004                       | 70  | Adults              | 100 | I or II           | Breast                                                                         | YES | YES | NR |
| Bharti, 2003                      | 120 | Children            | 52  | I or II           | Eye                                                                            | YES | YES | NR |
| Biswas, 2003a                     | 160 | Adults              | 100 | I or II           | Obstetrics &<br>Gynaecological                                                 | NR  | NR  | NR |
| Biswas, 2003b                     | 120 | Adults              | 80  | I or II           | Gastrointestinal                                                               | NR  | NR  | NR |
| Burmeister, 2003                  | 40  | Adults &<br>Elderly | 57  | I or II           | Gastrointestinal                                                               | YES | YES | NR |
| Charuluxananan,<br>2003           | 180 | Adults              | 100 | I or II           | Obstetrics &<br>Gynaecological                                                 | NR  | NR  | NR |
| Karamanlioglu,<br>2003            | 150 | Children            | 49  | I or II           | Miscellaneous                                                                  | NR  | NR  | NR |
| Loewen, 2003                      | 71  | Adults              | 100 | NR                | Breast                                                                         | YES | YES | NR |
| Maddali, 2003                     | 120 | Adults              | 100 | I or II           | Obstetrics &                                                                   | NR  | NR  | NR |

| Gynaecological                                                                 |     |                     |     |                   |                                |     |     |         |
|--------------------------------------------------------------------------------|-----|---------------------|-----|-------------------|--------------------------------|-----|-----|---------|
| Madenoglu, 2003                                                                | 60  | Adults              | 52  | I or II<br>or III | Neurological                   | NR  | NR  | NR      |
| O'Brien, 2003                                                                  | 150 | Children            | NR  | I or II           | Miscellaneous                  | YES | YES | NR      |
| Olutoye, 2003                                                                  | 204 | Children            | 27  | I or II           | Miscellaneous                  | YES | YES | NR      |
| Oztekin, 2003                                                                  | 40  | Adults              | 100 | I or II           | Obstetrics &<br>Gynaecological | NR  | NR  | NR      |
| Paech, 2003                                                                    | 118 | Adults              | 100 | NR                | Obstetrics &<br>Gynaecological | YES | YES | NR      |
| Pan, 2003                                                                      | 40  | Adults              | 100 | I or II           | Obstetrics &<br>Gynaecological | NR  | NR  | NR      |
| Samra, 2003 <sup>†</sup>                                                       | NR  | Adults              | 250 | NR                | Neurological                   | NR  | NR  | NR      |
| Szarvas, 2003                                                                  | 130 | Adults &<br>Elderly | 47  | I or II<br>or III | Orthopaedic                    | NR  | NR  | NR      |
| Tang, 2003                                                                     | 135 | Adults &<br>Elderly | 65  | I or II<br>or III | Miscellaneous                  | YES | YES | NR      |
| Thagaard, 2003                                                                 | 96  | Adults              | 69  | I or II           | Miscellaneous                  | YES | YES | NR      |
| Tzeng, 2003                                                                    | 65  | Adults              | 100 | I or II           | Obstetrics &<br>Gynaecological | NR  | NR  | NR      |
| Usmani, 2003                                                                   | 90  | All<br>groups       | NR  | I or II           | Otolaryngological              | NR  | NR  | NR      |
| Wagner, 2003                                                                   | 94  | Children            | 53  | I or II           | Eye                            | NR  | NR  | NR      |
| Wattwil, 2003                                                                  | 78  | Adults &<br>Elderly | 100 | I or II<br>or III | Breast                         | NR  | NR  | Cancer  |
| Yukse, 2003                                                                    | 60  | Adults              | 100 | I or II           | Obstetrics &<br>Gynaecological | NR  | NR  | NR      |
| Adducci, 2002                                                                  | 180 | Adults              | 70  | I or II           | Gastrointestinal               | NR  | NR  | NR      |
| Agarwal, 2002                                                                  | 100 | Adults              | 67  | I or II           | Gastrointestinal               | NR  | NR  | NR      |
| General dentistry,<br>oral and<br>maxillofacial<br>surgery and<br>orthodontics |     |                     |     |                   |                                |     |     |         |
| Arcioni, 2002                                                                  | 59  | Adults &<br>Elderly | 12  | I or II<br>or III | Orthodontics                   | NR  | NR  | NR      |
| Argiriadou, 2002                                                               | 87  | Adults              | 76  | I or II           | Gastrointestinal               | NR  | NR  | NR      |
| Coloma, 2002                                                                   | 60  | Adults              | 92  | I or II<br>or III | Miscellaneous                  | YES | YES | NR      |
| Coloma, 2002                                                                   | 140 | Adults              | 78  | I or II           | Gastrointestinal               | YES | YES | NR      |
| Elhakim, 2002                                                                  | 180 | Adults              | 72  | NR                | Gastrointestinal               | YES | YES | NR      |
| Fabling, 2002                                                                  | 46  | Adults &<br>Elderly | 50  | I or II<br>or III | Neurological                   | NR  | NR  | NR      |
| Gan, 2002                                                                      | 60  | Adults              | 100 | I or II           | Obstetrics &<br>Gynaecological | YES | YES | NR      |
| Goksu, 2002                                                                    | 60  | Adults              | 45  | I or II           | Otolaryngological              | NR  | NR  | NR      |
| Grimsehl, 2002                                                                 | 74  | Adults              | 100 | I or II           | Obstetrics &<br>Gynaecological | NR  | YES | NR      |
| Jokela, 2002                                                                   | 179 | Adults              | 100 | I or II<br>or III | Endocrine                      | YES | YES | NR      |
| Lee, 2002                                                                      | 113 | Adults              | 92  | I or II           | Endocrine                      | YES | YES | NR      |
| Marcus, 2002                                                                   | 120 | Adults              | 87  | NR                | Miscellaneous                  | YES | YES | NR      |
| Mullick, 2002                                                                  | 75  | Adults              | 100 | I                 | Obstetrics &<br>Gynaecological | YES | YES | NR      |
| Munro, 2002                                                                    | 53  | Children            | 39  | NR                | Gastrointestinal               | NR  | NR  | NR      |
| Ozmen, 2002                                                                    | 60  | Adults              | 70  | I or II           | Gastrointestinal               | NR  | NR  | NR      |
| Paech, 2002                                                                    | 139 | Adults              | 100 | NR                | Obstetrics &<br>Gynaecological | YES | YES | NR      |
| Quaynor, 2002                                                                  | 107 | Adults              | 93  | I or II           | Gastrointestinal               | YES | YES | NR      |
| Sanchez-Ledesma,<br>2002                                                       | 90  | Adults              | 100 | I or II           | Obstetrics &<br>Gynaecological | YES | YES | NR      |
| Sennaraj, 2002                                                                 | 150 | Children            | 58  | I or II           | Eye                            | NR  | YES | NR      |
| So, 2002                                                                       | 68  | Adults &<br>Elderly | 53  | I or II           | Gastrointestinal               | NR  | YES | Cancer  |
| General dentistry,<br>oral and<br>maxillofacial<br>surgery and<br>orthodontics |     |                     |     |                   |                                |     |     |         |
| Sukhani, 2002                                                                  | 149 | Children            | 48  | I or II           | Orthodontics                   | NR  | NR  | NR      |
| Wang, 2002a                                                                    | 115 | Adults              | 62  | I or II           | Gastrointestinal               | NR  | NR  | Obesity |

|                      |     |                   |      |                |                                                                    |     |     |             |
|----------------------|-----|-------------------|------|----------------|--------------------------------------------------------------------|-----|-----|-------------|
| Wang, 2002b          | 116 | Adults            | 56   | I or II        | Otolaryngological                                                  | NR  | NR  | NR          |
| Wang, 2002           | 114 | Adults            | 100  | I or II        | Obstetrics & Gynaecological                                        | NR  | NR  | NR          |
| White, 2002          | 120 | Adults            | 88   | I or II or III | Miscellaneous                                                      | YES | YES | NR          |
| Yazigi, 2002         | 100 | Adults            | 100  | I or II        | Obstetrics & Gynaecological                                        | NR  | NR  | NR          |
| Bowhay, 2001         | 131 | Children          | 40   | I or II        | Eye                                                                | NR  | NR  | NR          |
| Cherian, 2001        | 81  | Adults            | 100  | NR             | Obstetrics & Gynaecological                                        | NR  | NR  | NR          |
| Dabbous, 2001        | 173 | Adults            | 77   | I or II        | Gastrointestinal                                                   | YES | YES | Diabetes    |
| De Witte, 2001       | 40  | Adults & Elderly  | 52   | I or II        | Orthopaedic                                                        | NR  | NR  | NR          |
| Ganem, 2001          | 52  | Adults            | 100  | I or II or III | Obstetrics & Gynaecological                                        | NR  | NR  | NR          |
| Goll, 2001           | 240 | Adults            | 100  | I or II or III | Obstetrics & Gynaecological                                        | YES | YES | NR          |
| Kathirvel, 2001      | 152 | Adults & Children | 38   | I or II        | Neurological                                                       | NR  | NR  | NR          |
| Millo, 2001          | 137 | Adults            | 100  | NR             | Obstetrics & Gynaecological                                        | NR  | YES | NR          |
| Pan, 2001            | 156 | Adults            | 100  | I or II        | Obstetrics & Gynaecological                                        | NR  | NR  | NR          |
| Paventi, 2001        | 60  | Adults            | 46   | I or II        | Obstetrics & Gynaecological                                        | YES | YES | NR          |
| Shende, 2001         | 240 | Children          | 50   | I or II        | Eye                                                                | YES | YES | NR          |
|                      |     |                   |      |                | General dentistry, oral and maxillofacial surgery and orthodontics |     |     |             |
| Somri, 2001          | 60  | Children          | 41   | I              | Eye                                                                | NR  | NR  | NR          |
| Splinter, 2001       | 193 | Children          | NR   | NR             | Eye                                                                | NR  | NR  | NR          |
| Subramaniam, 2001    | 135 | Children          | 54   | I or II        | Eye                                                                | NR  | YES | NR          |
| Thomas, 2001         | 177 | Adults            | 100  | I or II        | Obstetrics & Gynaecological                                        | YES | YES | NR          |
| White, 2001          | 80  | Adults            | 100  | I or II        | Breast                                                             | YES | YES | NR          |
| Wilson, 2001         | 232 | Adults & Elderly  | 79   | I or II or III | Gastrointestinal                                                   | NR  | NR  | NR          |
| Yilmazlar, 2001      | 60  | Adults            | 100  | I or II        | Miscellaneous                                                      | NR  | NR  | NR          |
| Ahmed, 2000          | 139 | Adults            | 100  | NR             | Obstetrics & Gynaecological                                        | YES | YES | NR          |
| Charuluxananan, 2000 | 80  | Adults            | 100  | I or II        | Obstetrics & Gynaecological                                        | NR  | NR  | NR          |
| Fabling, 2000        | 60  | Adults & Elderly  | 53   | I or II or III | Neurological                                                       | NR  | NR  | NR          |
| Gesztesi, 2000       | 157 | Adults            | 100  | I or II        | Obstetrics & Gynaecological                                        | NR  | YES | NR          |
| Holt, 2000           | 125 | Children          | 54.4 | I or II        | Ear, nose and larynx                                               | YES | YES | Asthma      |
|                      |     |                   |      |                | General dentistry, oral and maxillofacial surgery and orthodontics |     |     |             |
| Jensen, 2000         | 71  | Children          | 41   | I or II        | orthodontics                                                       | YES | NR  | NR          |
| Jokela, 2000         | 120 | Adults            | 100  | I or II or III | Breast                                                             | YES | YES | Migraines   |
| Kothari, 2000        | 108 | Adults            | 73   | I or II or III | Gastrointestinal                                                   | YES | NR  | Gallbladder |
| Kreisler, 2000       | 31  | Adults            | 81   | NR             | Miscellaneous                                                      | NR  | YES | NR          |
| Ku, 2000             | 58  | Adults & Elderly  | 57   | NR             | Ear, nose and larynx                                               | YES | YES | NR          |
| Lee, 2000            | 120 | Adults            | 100  | I              | Obstetrics & Gynaecological                                        | NR  | YES | NR          |
| Liberman, 2000       | 84  | Adults & Children | 78   | NR             | Gastrointestinal                                                   | NR  | NR  | NR          |
| Najeeb, 2000         | 45  | Adults            | 62   | I or II        | Miscellaneous                                                      | NR  | NR  | NR          |
| Peixoto, 2000        | 90  | Adults &          | 100  | I or II        | Obstetrics &                                                       | NR  | NR  | NR          |

|                   |      | Elderly              |     | Gynaecological    |                                                                                |     |     |                |
|-------------------|------|----------------------|-----|-------------------|--------------------------------------------------------------------------------|-----|-----|----------------|
| Philip, 2000      | 1030 | Adults               | 70  | I or II<br>or III | Miscellaneous                                                                  | YES | YES | NR             |
| Reihner, 2000     | 207  | Adults &<br>Elderly  | 100 | I or II           | Breast                                                                         | YES | YES | NR             |
| Sadhasivam, 2000  | 180  | Children             | 53  | I or II           | Eye                                                                            | NR  | NR  | NR             |
| Scuderi, 2000     | 139  | Adults               | 100 | I or II<br>or III | Obstetrics &<br>Gynaecological                                                 | YES | YES | NR             |
| Sharma, 2000      | 98   | Adults               | 100 | I or II           | Obstetrics &<br>Gynaecological                                                 | NR  | NR  | NR             |
| Wu, 2000          | 152  | Adults               | 100 | I or II<br>or III | Obstetrics &<br>Gynaecological                                                 | YES | YES | NR             |
| Zarate, 2000      | 200  | Adults               | 44  | I or II           | Miscellaneous                                                                  | YES | YES | NR             |
| Abouleish, 1999   | 74   | Adults               | 100 | I or II           | Obstetrics &<br>Gynaecological                                                 | NR  | NR  | NR             |
| Allen, 1999       | 56   | Children             | 41  | NR                | Miscellaneous                                                                  | NR  | NR  | NR             |
| Barst, 1999       | 90   | Children             | 48  | I or II           | General dentistry,<br>oral and<br>maxillofacial<br>surgery and<br>orthodontics | NR  | NR  | NR             |
| Broome, 1999      | 109  | Adults               | 76  | I or II           | General dentistry,<br>oral and<br>maxillofacial<br>surgery and<br>orthodontics | NR  | NR  | NR             |
| Bugedo, 1999      | 242  | Adults               | 79  | I or II           | Miscellaneous                                                                  | NR  | NR  | NR             |
| Cholwill, 1999    | 175  | Adults               | 100 | I or II           | Obstetrics &<br>Gynaecological                                                 | YES | YES | NR             |
| de Adana, 1999    | 40   | Children             | NR  | NR                | Neurological                                                                   | NR  | NR  | NR             |
| Gurler, 1999      | 160  | Adults               | 78  | I or II           | Gastrointestinal                                                               | NR  | NR  | NR             |
| Helmy, 1999       | 397  | Adults               | 85  | I or II<br>or III | Miscellaneous                                                                  | NR  | YES | NR             |
| Janknegt, 1999    | 120  | Adults               | 100 | I or II<br>or III | Gastrointestinal                                                               | YES | YES | Migraines      |
| Jokela, 1999      | 100  | Children             | 50  | I or II           | Eye                                                                            | YES | YES | NR             |
| Kathirvel, 1999   | 63   | Adults &<br>Elderly  | 47  | I or II           | Otolaryngological                                                              | YES | YES | Cancer         |
| Khalil, 1999      | 88   | Adults               | 100 | I or II<br>or III | Obstetrics &<br>Gynaecological                                                 | YES | YES | NR             |
| Koivuranta, 1999  | 428  | Adults               | 82  | I or II<br>or III | Miscellaneous                                                                  | YES | YES | NR             |
| Kovac, 1999       | 400  | Adults               | 60  | I or II           | Gastrointestinal                                                               | NR  | NR  | NR             |
| Kyokong, 1999     | 100  | Adults &<br>Children | 50  | NR                | Miscellaneous                                                                  | NR  | YES | NR             |
| McCall, 1999      | 73   | Children             | 53  | I or II           | Eye                                                                            | NR  | NR  | NR             |
| Munro, 1999       | 51   | Adults               | 100 | I                 | Obstetrics &<br>Gynaecological                                                 | NR  | NR  | NR             |
| Rajeeva, 1999     | 52   | Adults &<br>Elderly  | 25  | I or II           | Gastrointestinal                                                               | NR  | NR  | Gallbladder    |
| Sadhasivam, 1999  | 54   | Adults               | 100 | I or II           | Breast                                                                         | YES | YES | Cardiovascular |
| Sandhu, 1999      | 87   | Adults               | 100 | I or II           | Obstetrics &<br>Gynaecological                                                 | NR  | NR  | NR             |
| Scuderi, 1999a    | 575  | Adults               | 63  | I or II<br>or III | Miscellaneous                                                                  | NR  | YES | NR             |
| Scuderi, 1999b    | NR   | Adults               | NR  | I or II<br>or III | NR                                                                             | NR  | NR  | NR             |
| Sinha, 1999       | 40   | Adults               | 47  | I or II<br>or III | Neurological                                                                   | NR  | YES | NR             |
| Swiatkowski, 1999 | 134  | Adults               | 100 | I or II           | Miscellaneous                                                                  | NR  | NR  | Obesity        |
| Tsui, 1999        | 121  | Adults               | 100 | I or II<br>or III | Obstetrics &<br>Gynaecological                                                 | NR  | NR  | NR             |
| Turhanoglu, 1999  | 100  | Adults               | 100 | I or II           | Obstetrics &<br>Gynaecological                                                 | NR  | NR  | NR             |
| Wagley, 1999      | 50   | Adults               | 50  | I or II           | General dentistry,<br>oral and<br>maxillofacial                                | NR  | NR  | NR             |

|                   |      |                   |     |                |                                                                    |     |     |          |
|-------------------|------|-------------------|-----|----------------|--------------------------------------------------------------------|-----|-----|----------|
|                   |      |                   |     |                | surgery and orthodontics                                           |     |     |          |
| Woodward, 1999    | 216  | Adults & Elderly  | 18  | II or III      | Cardiac                                                            | NR  | YES | NR       |
| Alon, 1998        | 314  | Adults & Elderly  | 92  | I or II        | Miscellaneous                                                      | NR  | NR  | NR       |
|                   |      |                   |     |                | General dentistry, oral and maxillofacial surgery and orthodontics |     |     |          |
| Ang, 1998         | 47   | Children          | 45  | I or II        | Endocrine                                                          | NR  | NR  | NR       |
| Bacic, 1998       | 50   | Adults            | 100 | NR             | Breast                                                             | NR  | NR  | NR       |
| Chan, 1998        | 148  | Adults            | 100 | I or II        | Orthopaedic                                                        | YES | YES | NR       |
| Chen, 1998a       | 78   | Adults & Elderly  | 37  | I or II or III | Miscellaneous                                                      | NR  | YES | Obesity  |
| Chen, 1998b       | 80   | Children          | 34  | I or II        | Gastrointestinal                                                   | NR  | NR  | NR       |
| Dabbous, 1998     | 85   | Adults            | 62  | I or II        | General dentistry, oral and maxillofacial surgery and orthodontics | YES | YES | Diabetes |
|                   |      |                   |     |                | General dentistry, oral and maxillofacial surgery and orthodontics |     |     |          |
| Daftary, 1998     | 150  | Children          | 46  | I              | Miscellaneous                                                      | NR  | NR  | NR       |
| Dershwitz, 1998   | 175  | Adults & Elderly  | 100 | NR             | Obstetrics & Gynaecological                                        | NR  | NR  | NR       |
| Diemunsch, 1998   | 793  | Adults            | 100 | I or II or III | Eye                                                                | YES | YES | NR       |
| Doe, 1998         | 45   | Adults & Children | 42  | I or II or III | Obstetrics & Gynaecological                                        | NR  | NR  | NR       |
| Dresner, 1998     | 60   | Adults            | 100 | I or II        | Orthopaedic                                                        | NR  | NR  | NR       |
| Goodarzi, 1998    | 81   | Children          | 43  | I or II        | General dentistry, oral and maxillofacial surgery and orthodontics | NR  | NR  | NR       |
|                   |      |                   |     |                | General dentistry, oral and maxillofacial surgery and orthodontics |     |     |          |
| Hamid, 1998       | 71   | Children          | 55  | I or II        | Otolaryngological                                                  | NR  | YES | NR       |
| Jellish, 1998     | 120  | Adults            | 51  | I or II        | Obstetrics & Gynaecological                                        | NR  | NR  | NR       |
| Mitra, 1998       | 80   | Adults            | 100 | NR             | Obstetrics & Gynaecological                                        | YES | YES | NR       |
| Morris, 1998      | 1044 | Adults            | 100 | I or II or III | Obstetrics & Gynaecological                                        | NR  | YES | NR       |
| Scholz, 1998      | 842  | Adults & Elderly  | 74  | I or II or III | Miscellaneous                                                      | YES | YES | NR       |
| Splinter, 1998a   | 197  | Children          | NR  | NR             | Eye                                                                | NR  | NR  | NR       |
|                   |      |                   |     |                | General dentistry, oral and maxillofacial surgery and orthodontics |     |     |          |
| Splinter, 1998b   | 216  | Children          | 55  | I or II or III | Obstetrics & Gynaecological                                        | NR  | NR  | NR       |
| Tang, 1998a       | 218  | Adults            | 100 | I or II        | Obstetrics & Gynaecological                                        | YES | YES | NR       |
| Tang, 1998b       | 156  | Adults            | 100 | I or II        | Eye                                                                | YES | YES | NR       |
| Tramer, 1998      | 157  | Children          | 49  | NR             | Endocrine                                                          | YES | YES | NR       |
| Akcabay, 1997     | 60   | Adults            | NR  | I or II        | Orthopaedic                                                        | NR  | NR  | NR       |
| Alexander, 1997   | 124  | All groups        | 61  | I or II        | Eye                                                                | NR  | YES | NR       |
| Ascaso, 1997      | 251  | Adults & Elderly  | 49  | I or II        | Eye                                                                | NR  | NR  | NR       |
| Bach-Styles, 1997 | 101  | Children          | NR  | I or II or III | Eye                                                                | NR  | NR  | NR       |
|                   |      |                   |     |                | General dentistry, oral and maxillofacial surgery and orthodontics |     |     |          |
| Carnahan, 1997    | 54   | Children          | 48  | I or II        | Miscellaneous                                                      | NR  | NR  | NR       |
| Diemunsch, 1997a  | 746  | Adults & Elderly  | 91  | NR             | Miscellaneous                                                      | YES | YES | NR       |



|                         |     |                   |     |                |                                                                    |     |     |           |
|-------------------------|-----|-------------------|-----|----------------|--------------------------------------------------------------------|-----|-----|-----------|
| Diemunsch, 1997b        | 281 | Adults            | 100 | I or II        | Obstetrics & Gynaecological                                        | NR  | YES | NR        |
| Diemunsch, 1997c        | 337 | Adults            | 95  | I or II        | Obstetrics & Gynaecological                                        | NR  | YES | NR        |
| Graczyk, 1997           | 635 | Adults            | 100 | I or II        | Obstetrics & Gynaecological                                        | NR  | YES | NR        |
| Klockgether-Radke, 1997 | 120 | Children          | 48  | I or II        | Eye                                                                | NR  | NR  | NR        |
| Koivuranta, 1997        | 439 | Adults & Elderly  | 100 | I or II or III | Miscellaneous                                                      | YES | YES | Migraines |
| Korttila, 1997          | 517 | Adults            | 94  | I or II or III | Miscellaneous                                                      | YES | YES | NR        |
| Kovac, 1997             | 620 | Adults            | 83  | I or II or III | Miscellaneous                                                      | YES | YES | NR        |
| Lawhorn, 1997           | 320 | Children          | NR  | I or II        | Miscellaneous                                                      | NR  | NR  | NR        |
| Maestre, 1997           | 80  | Adults            | 100 | I or II or III | Obstetrics & Gynaecological                                        | YES | YES | NR        |
| McKenzie, 1997          | 233 | Adults & Children | 54  | I or II        | Miscellaneous                                                      | NR  | NR  | NR        |
| Mikawa, 1997            | 200 | Adults & Elderly  | 100 | I              | Obstetrics & Gynaecological                                        | NR  | YES | NR        |
| Moens, 1997             | 206 | Adults            | 69  | NR             | Miscellaneous                                                      | NR  | YES | NR        |
| Monagle, 1997           | 91  | Adults            | 100 | NR             | Obstetrics & Gynaecological                                        | NR  | YES | NR        |
| Morton, 1997            | 427 | Children          | 51  | I or II        | General dentistry, oral and maxillofacial surgery and orthodontics | NR  | YES | NR        |
| Patel, 1997             | 429 | Children          | 37  | I or II or III | Miscellaneous                                                      | YES | YES | NR        |
| Pitkanen, 1997          | 73  | Adults & Elderly  | NR  | I or II or III | Orthopaedic                                                        | NR  | NR  | NR        |
| Polati, 1997            | 175 | Adults            | 100 | I or II        | Obstetrics & Gynaecological                                        | YES | YES | NR        |
| Purhonen, 1997          | 146 | Adults            | 100 | I or II or III | Miscellaneous                                                      | YES | YES | NR        |
| Rung, 1997              | 121 | Adults & Elderly  | 69  | I or II or III | Miscellaneous                                                      | YES | YES | NR        |
| Scuderi, 1997           | 160 | Children          | 52  | I or II        | Eye                                                                | NR  | YES | NR        |
| Shende, 1997            | 176 | Children          | 49  | I              | Eye                                                                | NR  | NR  | NR        |
| Sniadach, 1997          | 158 | Adults            | 100 | I or II        | Obstetrics & Gynaecological                                        | NR  | NR  | NR        |
| Splinter, 1997          | 239 | Children          | NR  | I or II        | General dentistry, oral and maxillofacial surgery and orthodontics | NR  | NR  | NR        |
| Stienstra, 1997         | 74  | Adults            | 100 | I or II        | Obstetrics & Gynaecological                                        | NR  | NR  | NR        |
| Sun, 1997               | 75  | Adults & Elderly  | 33  | I or II        | Otolaryngological                                                  | YES | YES | NR        |
| Taylor, 1997            | 523 | Adults & Elderly  | 89  | I or II or III | Multiple types included                                            | YES | YES | NR        |
| Ulusoy, 1997            | 40  | Adults            | 37  | I or II        | Miscellaneous                                                      | NR  | NR  | NR        |
| Warriner, 1997          | 374 | Adults & Elderly  | 100 | I or II        | Obstetrics & Gynaecological                                        | YES | YES | NR        |
| Ali-melkkila, 1996      | 120 | Adults            | 42  | I or II or III | Eye                                                                | NR  | YES | NR        |
| Alon, 1996              | 80  | All groups        | 100 | I or II        | Obstetrics & Gynaecological                                        | NR  | YES | NR        |
| Capouet, 1996           | 385 | Adults            | 100 | I or II        | Miscellaneous                                                      | YES | YES | NR        |
| Chen, 1996              | 49  | Adults            | 100 | I or II        | Obstetrics & Gynaecological                                        | YES | YES | NR        |
| Cieslak, 1996           | 97  | Children          | 48  | I or II        | Miscellaneous                                                      | NR  | NR  | NR        |
| Davies, 1996            | 66  | Adults & Elderly  | 100 | I or II        | Obstetrics & Gynaecological                                        | YES | YES | NR        |
| Ercelen, 1996           | 100 | Children          | 48  | I              | Eye                                                                | NR  | NR  | NR        |

|                                  |     |                   |     |                |                                                                    |     |     |    |
|----------------------------------|-----|-------------------|-----|----------------|--------------------------------------------------------------------|-----|-----|----|
| Eriksson, 1996                   | 58  | Adults            | 100 | I or II        | Obstetrics & Gynaecological                                        | NR  | NR  | NR |
| Furst, 1996                      | 60  | Children          | 45  | NR             | Neurological                                                       | NR  | NR  | NR |
| Gaynes, 1996 <sup>†</sup>        | 87  | NR                | NR  | NR             | Eye                                                                | NR  | NR  | NR |
| Honkavaara, 1996                 | 241 | Adults            | 55  | I or II        | Miscellaneous                                                      | NR  | NR  | NR |
| Kaul, 1996                       | 375 | Children          | 40  | I or II or III | Miscellaneous                                                      | YES | YES | NR |
| Khalil, 1996                     | 140 | Adults            | NR  | NR             | Obstetrics & Gynaecological                                        | NR  | NR  | NR |
| Kimya, 1996                      | 63  | Adults & Elderly  | 78  | I or II        | Gastrointestinal                                                   | YES | YES | NR |
| Koivuranta, 1996                 | 468 | Adults            | 0   | I or II        | Miscellaneous                                                      | YES | YES | NR |
| Kovac, 1996 (CR: Pearman, 1994c) | 30  | Adults            | 100 | I or II        | Obstetrics & Gynaecological                                        | NR  | NR  | NR |
|                                  |     |                   |     |                | General dentistry, oral and maxillofacial surgery and orthodontics |     |     |    |
| Kumar, 1996                      | 165 | Children          | NR  | I or II        | Obstetrics & Gynaecological                                        | NR  | NR  | NR |
| Lawhorn, 1996                    | 82  | Adults            | 74  | I or II        | Gastrointestinal                                                   | NR  | NR  | NR |
| Lekprasert, 1996                 | 100 | Adults            | 100 | I or II        | Obstetrics & Gynaecological                                        | YES | YES | NR |
| Lopez-Orlando, 1996              | 132 | Adults & Elderly  | 82  | I or II        | Gastrointestinal                                                   | NR  | NR  | NR |
| Naguib, 1996                     | 48  | Adults            | 100 | I or II        | Obstetrics & Gynaecological                                        | NR  | NR  | NR |
| Pan, 1996                        | 60  | Adults & Elderly  | 100 | I or II        | Obstetrics & Gynaecological                                        | YES | YES | NR |
| Principi, 1996                   | 100 | Adults            | 100 | I or II        | Miscellaneous                                                      | YES | YES | NR |
| Pueyo, 1996                      | 60  | Adults            | 62  | I or II or III | Neurological                                                       | YES | YES | NR |
| Pugh, 1996                       | 92  | Adults            | 100 | NR             | Miscellaneous                                                      | NR  | NR  | NR |
| Rodrigo, 1996                    | 32  | Adults & Elderly  | 34  | NR             | Miscellaneous                                                      | NR  | NR  | NR |
|                                  |     |                   |     |                | General dentistry, oral and maxillofacial surgery and orthodontics |     |     |    |
| Rose, 1996a                      | 136 | Children          | 44  | I or II        | General dentistry, oral and maxillofacial surgery and orthodontics | NR  | NR  | NR |
|                                  |     |                   |     |                | General dentistry, oral and maxillofacial surgery and orthodontics |     |     |    |
| Rose, 1996b                      | 200 | Children          | 48  | I or II        | General dentistry, oral and maxillofacial surgery and orthodontics | NR  | NR  | NR |
|                                  |     |                   |     |                | General dentistry, oral and maxillofacial surgery and orthodontics |     |     |    |
| Stene, 1996                      | 120 | Children          | NR  | I or II        | General dentistry, oral and maxillofacial surgery and orthodontics | NR  | NR  | NR |
| Tang, 1996                       | 161 | Adults            | 100 | I or II        | Obstetrics & Gynaecological                                        | YES | YES | NR |
| Usha, 1996                       | 148 | Adults & Children | 47  | I or II        | Otolaryngological                                                  | YES | YES | NR |
|                                  |     |                   |     |                | General dentistry, oral and maxillofacial surgery and orthodontics |     |     |    |
| Van Den Berg, 1996a              | 282 | Adults & Children | 39  | I or II        | General dentistry, oral and maxillofacial surgery and orthodontics | NR  | NR  | NR |
| Van Den Berg, 1996b              | 220 | Adults & Children | 21  | I or II        | Otolaryngological                                                  | YES | YES | NR |
| Van Den Berg, 1996c              | 167 | Adults            | 100 | NR             | Obstetrics & Gynaecological                                        | YES | YES | NR |
| Watts, 1996                      | 527 | Adults & Elderly  | 96  | I or II or III | Miscellaneous                                                      | YES | YES | NR |
| Wilson, 1996                     | 60  | Adults            | 100 | I or II        | Obstetrics & Gynaecological                                        | NR  | YES | NR |
| Wrench, 1996                     | 60  | Adults            | 82  | I or II        | Endocrine                                                          | NR  | NR  | NR |
| Yilmazlar, 1996                  | 127 | All               | 61  | I or II        | Orthopaedic                                                        | NR  | YES | NR |

|                                   |     | groups            |     |                |                                                                    |     |     |                 |
|-----------------------------------|-----|-------------------|-----|----------------|--------------------------------------------------------------------|-----|-----|-----------------|
| Alexander, 1995                   | 32  | Adults            | 47  | I or II        | Miscellaneous                                                      | YES | YES | NR              |
| Campbell, 1995                    | 213 | Adults & Children | 39  | I or II        | Eye                                                                | NR  | NR  | NR              |
| Davis, 1995a                      | 95  | Children          | NR  | I or II        | General dentistry, oral and maxillofacial surgery and orthodontics | NR  | NR  | NR              |
| Davis, 1995b                      | 286 | Adults            | 100 | I or II or III | Obstetrics & Gynaecological                                        | YES | YES | Diabetes        |
| Desilva, 1995                     | 50  | Adults            | 70  | I or II        | Gastrointestinal                                                   | NR  | NR  | NR              |
| Elhakim, 1995                     | 80  | Adults            | 100 | I or II        | Obstetrics & Gynaecological                                        | YES | YES | NR              |
| Grond, 1995                       | 49  | Adults & Children | 41  | I or II        | Ear, nose and larynx                                               | YES | YES | NR              |
| Litman, 1995                      | 57  | Children          | 40  | I or II        | Eye                                                                | YES | YES | NR              |
| Mikawa, 1995                      | 120 | Adults            | 100 | I              | Obstetrics & Gynaecological                                        | NR  | YES | NR              |
| Paech, 1995                       | 259 | Adults            | 100 | NR             | Obstetrics & Gynaecological                                        | NR  | YES | NR              |
| Paxton, 1995a                     | 60  | Children          | 47  | NR             | Ear, nose and larynx                                               | NR  | NR  | NR              |
| Paxton, 1995b                     | 118 | Adults            | 100 | NR             | Obstetrics & Gynaecological                                        | NR  | YES | NR              |
| Splinter, 1995a                   | 233 | Children          | NR  | NR             | General dentistry, oral and maxillofacial surgery and orthodontics | NR  | NR  | NR              |
| Splinter, 1995b                   | 276 | Children          | NR  | NR             | General dentistry, oral and maxillofacial surgery and orthodontics | NR  | NR  | NR              |
| Watcha, 1995                      | 130 | Children          | 51  | I or II        | Multiple types included                                            | YES | YES | NR              |
| Furst, 1994                       | 239 | Children          | 49  | I or II        | General dentistry, oral and maxillofacial surgery and orthodontics | NR  | NR  | NR              |
| Gan, 1994                         | 120 | All groups        | 56  | I or II        | Orthopaedic                                                        | NR  | NR  | NR              |
| Kaufmann, 1994                    | 286 | Adults            | 54  | I or II        | Orthopaedic                                                        | NR  | NR  | NR              |
| Khalil, 1994 (CR: Pearman, 1994b) | 589 | Adults & Elderly  | 100 | I or II        | Miscellaneous                                                      | YES | YES | NR              |
| Litman, 1994                      | 60  | Children          | 57  | I or II        | General dentistry, oral and maxillofacial surgery and orthodontics | NR  | NR  | NR              |
| Malins, 1994                      | 180 | Adults & Elderly  | 100 | I or II        | Obstetrics & Gynaecological                                        | YES | YES | NR              |
| McKenzie, 1994                    | 150 | Adults            | 100 | I or II        | Obstetrics & Gynaecological                                        | NR  | NR  | NR              |
| Rodrigo, 1994                     | 77  | Adults            | 65  | I or II        | General dentistry, oral and maxillofacial surgery and orthodontics | NR  | NR  | NR              |
| Rose, 1994                        | 100 | Children          | 51  | I or II        | Eye                                                                | NR  | NR  | NR              |
| Suen, 1994                        | 204 | Adults            | 100 | I or II        | Obstetrics & Gynaecological                                        | NR  | NR  | NR              |
| Ummerhofer, 1994                  | 200 | Children          | 34  | I or II        | Miscellaneous                                                      | NR  | NR  | NR              |
| Volpe, 1994                       | 928 | Adults & Elderly  | 57  | I or II        | Miscellaneous                                                      | NR  | NR  | NR              |
| Dupeyron, 1993                    | 243 | Adults &          | 100 | I or II        | Obstetrics &                                                       | NR  | NR  | Cardiovascular, |

|                                                          |      | Elderly              |     | or III            | Gynaecological                                                                 |     |     | urological                  |
|----------------------------------------------------------|------|----------------------|-----|-------------------|--------------------------------------------------------------------------------|-----|-----|-----------------------------|
| Helmers, 1993                                            | 923  | Adults               | 100 | I or II<br>or III | Obstetrics &<br>Gynaecological                                                 | NR  | NR  | NR                          |
| McKenzie, 1993b<br>(CR: Dershwitz,<br>1992)              | 137  | Adults               | 100 | I or II<br>or III | Miscellaneous                                                                  | NR  | YES | NR                          |
| Raphael, 1993                                            | 123  | Adults               | 100 | NR                | Obstetrics &<br>Gynaecological                                                 | YES | YES | NR                          |
| Sung, 1993                                               | 180  | Adults               | 100 | I or II           | Obstetrics &<br>Gynaecological                                                 | NR  | YES | NR                          |
| Zomers, 1993                                             | 69   | Adults &<br>Elderly  | 100 | NR                | Obstetrics &<br>Gynaecological                                                 | NR  | YES | Cardiovascular,<br>diabetes |
| Alon, 1992                                               | 66   | Adults &<br>Children | 100 | I                 | Obstetrics &<br>Gynaecological                                                 | NR  | NR  | NR                          |
| Du Pen, 1992 (CR:<br>Scuderi, 1993)                      | 500  | All<br>groups        | 11  | I or II           | Miscellaneous                                                                  | NR  | NR  | NR                          |
| Kenny, 1992                                              | 982  | Adults &<br>Elderly  | 100 | I or II<br>or III | Obstetrics &<br>Gynaecological                                                 | NR  | NR  | NR                          |
| Kovac, 1992 (CRs:<br>McKenzie, 1993a;<br>Pearman, 1994a) | 580  | Adults               | 100 | I or II           | Obstetrics &<br>Gynaecological                                                 | NR  | YES | NR                          |
| Bodner, 1991                                             | 71   | Adults               | 100 | NR                | Obstetrics &<br>Gynaecological                                                 | NR  | YES | NR                          |
| Larijani, 1991                                           | 36   | Adults               | 94  | I or II<br>or III | NR                                                                             | NR  | NR  | NR                          |
| Leeser, 1991                                             | 84   | Adults               | 100 | I or II<br>or III | Obstetrics &<br>Gynaecological                                                 | NR  | NR  | NR                          |
| <i>Non-randomized clinical trials (n=5)</i>              |      |                      |     |                   |                                                                                |     |     |                             |
| Stamer, 2011                                             | 141  | Adults &<br>Elderly  | 45  | I or II<br>or III | Miscellaneous                                                                  | NR  | YES | NR                          |
|                                                          | 60   | Adults &<br>Children | 30  | I or II           | General dentistry,<br>oral and<br>maxillofacial<br>surgery and<br>orthodontics | YES | NR  | NR                          |
| Rabbani, 2010                                            |      |                      |     |                   |                                                                                |     |     |                             |
| Kim, 2007                                                | 2839 | Adults               | NR  | NR                | NR                                                                             | NR  | NR  | NR                          |
| Biedler, 2004                                            | 159  | Adults               | 57  | I or II<br>or III | Miscellaneous                                                                  | YES | YES | NR                          |
| Manani, 1996                                             | 100  | Children             | 100 | NR                | Eye                                                                            | NR  | NR  | NR                          |
| <i>Controlled before-after studies (n=1)</i>             |      |                      |     |                   |                                                                                |     |     |                             |
| Wagner, 2007                                             | 66   | Children             | 54  | I or II           | Eye                                                                            | NR  | NR  | NR                          |
| <i>Cohort studies (n=9)</i>                              |      |                      |     |                   |                                                                                |     |     |                             |
| Shakeel, 2012                                            | 432  | Children             | 50  | NR                | General dentistry,<br>oral and<br>maxillofacial<br>surgery and<br>orthodontics | NR  | NR  | NR                          |
| Chen, 2011                                               | 90   | Adults &<br>Elderly  | 69  | I or II<br>or III | Orthopaedic                                                                    | NR  | NR  | NR                          |
| Eryilmaz, 2008                                           | 212  | Adults &<br>Children | 84  | NR                | Miscellaneous                                                                  | YES | YES | NR                          |
| Habib, 2007                                              | 3814 | Adults &<br>Elderly  | 66  | NR                | Miscellaneous                                                                  | NR  | NR  | NR                          |
| Flynn, 2006                                              | 849  | NR                   |     | NR                | Neurological                                                                   | NR  | NR  | NR                          |
| Piwko, 2005                                              | 38   | Children             | NR  | I or II           | Eye                                                                            | NR  | NR  | NR                          |
| Wang, 2005                                               | 282  | Adults &<br>Elderly  | NR  | NR                | Miscellaneous                                                                  | NR  | NR  | NR                          |
| Walker, 2001                                             | 59   | Adults               | 85  | NR                | Miscellaneous                                                                  | NR  | YES | NR                          |
| O'Brien, 2000                                            | 200  | NR                   | NR  | NR                | NR                                                                             | NR  | NR  | NR                          |

---

**Note:** †Unpublished data (Gurha, 2012; Apfel, 2011; White, 2005; Samra, 2003; Gaynes, 1996).

**Abbreviations:** ASA, American Society of Anaesthesiologists physical classification system; NR, not reported or No; CR, companion report; PONV, post-operative nausea and vomiting; H/o, History of.

---

## Appendix 7. Cochrane EPOC Risk-of-bias appraisal results

| Author, year                                      | 1       | 2       | 3       | 4       | 5       | 6       | 7       | 8       | 9       |
|---------------------------------------------------|---------|---------|---------|---------|---------|---------|---------|---------|---------|
| <i>Randomized clinical trials (n=429)</i>         |         |         |         |         |         |         |         |         |         |
| Browning, 2013                                    | Low     | Low     | Unclear | Low     | Low     | Low     | Low     | Unclear | Low     |
| Aleyasin, 2012                                    | Low     | Unclear | Unclear | Low     | Unclear | Unclear | Low     | Unclear | Unclear |
| Blitz, 2012                                       | Unclear | Unclear | Unclear | Low     | Unclear | Unclear | Low     | Low     | Low     |
| Choi, 2012                                        | Low     | Low     | Unclear | Low     | Unclear | Low     | Low     | Unclear | Unclear |
| de Orange, 2012                                   | Low     | Low     | Unclear | Low     | Low     | Low     | Unclear | Low     | Unclear |
| Eidi, 2012                                        | Low     | Low     | Unclear | Low     | Unclear | Low     | Low     | Low     | Low     |
| Gurha, 2012 <sup>†</sup>                          | Unclear | Unclear | Unclear | Unclear | Unclear | Unclear | Unclear | Unclear | Unclear |
| Koh, 2012                                         | Low     | Unclear | Low     | Low     | High    | Low     | Unclear | Low     | Unclear |
| Lahsaei, 2012                                     | Unclear | High    | Unclear | Unclear | Unclear | Low     | Low     | Unclear | Unclear |
| Madenoglu, 2012                                   | Unclear | Low     | Unclear | Low     | Unclear | Low     | Low     | Unclear | Unclear |
| Moon, 2012                                        | Low     | Low     | Unclear | Low     | Low     | Low     | Low     | Unclear | Low     |
| Park JW, 2012                                     | Unclear | Unclear | Unclear | Low     | Unclear | Unclear | Unclear | Unclear | Unclear |
| Wang, 2012                                        | Low     | High    | Unclear | Low     | Low     | Low     | Unclear | Unclear | Unclear |
| Ahmed, 2011                                       | Low     | Low     | Unclear | Low     | Unclear | Unclear | Low     | Unclear | Unclear |
| Apfel, 2011 <sup>†</sup>                          | Unclear | Unclear | Unclear | Unclear | Unclear | Unclear | Unclear | Unclear | Unclear |
| Asl, 2011                                         | Unclear | Unclear | Unclear | Low     | Unclear | Low     | Unclear | Unclear | Unclear |
| Bajwa, 2011                                       | Low     | Unclear | Unclear | Low     | Unclear | Unclear | Low     | Unclear | Unclear |
| Basu, 2011                                        | Unclear | Unclear | Unclear | Low     | Low     | Low     | Low     | Unclear | High    |
| Bhattarai, 2011                                   | Unclear | Unclear | Unclear | Low     | Unclear | Unclear | Low     | Unclear | Unclear |
| Bicer, 2011                                       | Low     | Low     | Unclear | Low     | Unclear | Low     | Low     | Unclear | Unclear |
| D'Souza, 2011                                     | Unclear | Unclear | Unclear | Low     | Low     | High    | Unclear | Unclear | Unclear |
| Ekinci, 2011                                      | Low     | Unclear | Unclear | Low     | Low     | Low     | Low     | Unclear | Unclear |
| El-deeb, 2011a                                    | Low     | Low     | Unclear | Low     | Unclear | Low     | Low     | Unclear | Unclear |
| El-deeb, 2011b                                    | Low     | Low     | Unclear | Low     | Unclear | Low     | Low     | Unclear | Unclear |
| El-deeb, 2011c                                    | Low     | Unclear | Unclear | Low     | Unclear | Low     | Low     | Unclear | Unclear |
| Gan, 2011                                         | Low     | Low     | Unclear | Low     | High    | Low     | Unclear | Low     | Low     |
| Islam, 2011                                       | Unclear | Unclear | Unclear | Low     | Unclear | Unclear | Low     | Unclear | Unclear |
| Khan, 2011                                        | Unclear | Unclear | Unclear | Low     | Unclear | Unclear | Low     | Unclear | Unclear |
| Lee, 2011                                         | Low     | Low     | Unclear | Low     | Unclear | Low     | Low     | Unclear | Unclear |
| Metaxari, 2011                                    | Low     | Unclear | Unclear | Low     | High    | Low     | Low     | Unclear | Unclear |
| Park, 2011                                        | Low     | Unclear | Unclear | Low     | Low     | Low     | Low     | Unclear | Low     |
| Ryu, 2011                                         | Low     | Low     | Unclear | Low     | Low     | Low     | Low     | Low     | Low     |
| Safae, 2011                                       | Unclear | Unclear | Unclear | Low     | Unclear | Unclear | Low     | Unclear | Unclear |
| Sahoo, 2011                                       | Low     | Unclear | Unclear | Low     | Unclear | Low     | Low     | Unclear | Unclear |
| Singh, 2011                                       | Unclear | Unclear | Unclear | Low     | Unclear | Low     | Low     | Unclear | Unclear |
| Song, 2011                                        | Low     | Low     | Unclear | Low     | Low     | Unclear | Low     | Low     | Unclear |
| Srivastava, 2011                                  | Unclear | Unclear | Unclear | Low     | Unclear | Unclear | Low     | Unclear | Unclear |
| Talesh, 2011                                      | Unclear | Low     | Unclear | Unclear | Unclear | Unclear | Unclear | Unclear | Unclear |
| Vale, 2011                                        | Low     | Low     | Unclear | Low     | Low     | Low     | Low     | Unclear | Low     |
| Akhtar, 2010                                      | Low     | Unclear | Unclear | Low     | Unclear | Low     | Low     | Unclear | Unclear |
| Alghanem, 2010                                    | Low     | Low     | Unclear | Low     | Low     | Low     | Low     | Low     | Unclear |
| Bhattachajee, 2010                                | Low     | Low     | Unclear | Low     | Unclear | Unclear | Low     | Unclear | Unclear |
| Bilgin, 2010                                      | Low     | Low     | Unclear | Low     | Low     | Low     | Low     | Unclear | Unclear |
| Choi, 2010                                        | Low     | Low     | Low     | Low     | High    | Unclear | Low     | Unclear | Unclear |
| Dabbous, 2010                                     | Low     | Low     | Unclear | Low     | High    | Low     | Low     | Unclear | Unclear |
| Ebrahim Soltani, 2010 (CR: Ebrahim Soltani, 2011) | Low     | Unclear | Unclear | Low     | Unclear | Low     | Low     | Unclear | Unclear |
| Hahm, 2010                                        | Low     | Unclear | Unclear | Low     | Low     | Low     | Low     | Unclear | Unclear |
| Huh, 2010                                         | Low     | Unclear | Unclear | Low     | Unclear | Low     | Unclear | Unclear | Unclear |
| Jee, 2010                                         | Low     | Unclear | Unclear | Low     | Unclear | Unclear | Unclear | Unclear | Unclear |
| Jokela, 2010                                      | Low     | Unclear | Unclear | Low     | High    | Low     | Low     | Unclear | Unclear |
| Mishra, 2010                                      | Unclear | Unclear | Unclear | Low     | Unclear | Unclear | Unclear | Unclear | Unclear |
| Omar, 2010                                        | Low     | Unclear | Unclear | Low     | Unclear | Unclear | Low     | Unclear | Unclear |
| Rauers, 2010                                      | Low     | Low     | Unclear | Low     | Low     | Low     | Low     | Unclear | Unclear |
| Ryu, 2010                                         | Low     | Low     | Unclear | Low     | Low     | Low     | Low     | Unclear | Unclear |
| Shakya, 2010                                      | Unclear | Unclear | Unclear | Low     | Unclear | Unclear | Unclear | Unclear | Low     |
| Singla, 2010                                      | Unclear | Unclear | Unclear | Low     | Low     | Low     | Unclear | Low     | Unclear |
| Tan, 2010                                         | Low     | Unclear | Unclear | Low     | Unclear | Low     | Low     | Unclear | Unclear |
| Yun, 2010                                         | Low     | Low     | Unclear | Low     | Low     | Low     | Low     | Unclear | Unclear |
| Farouk, 2009                                      | Unclear | Unclear | Unclear | Low     | Low     | Low     | Low     | Unclear | Unclear |

|                           |         |         |         |         |         |         |         |         |         |
|---------------------------|---------|---------|---------|---------|---------|---------|---------|---------|---------|
| Feng, 2009                | Low     | Low     | Low     | Low     | Low     | Low     | Low     | Unclear | Low     |
| Gan, 2009                 | Low     | Low     | Unclear | Low     | Low     | Low     | Unclear | Unclear | Unclear |
| Gandhi, 2009              | Unclear | Low     | Unclear | Low     | Low     | Unclear | Low     | Unclear | Unclear |
| Grover, 2009              | Low     | Low     | Unclear | Low     | Low     | Low     | Unclear | Unclear | Unclear |
| Jain, 2009                | Low     | Unclear | Unclear | Low     | High    | Unclear | Unclear | Unclear | Unclear |
| Jellish, 2009             | Unclear | Low     | Unclear | High    | High    | Unclear | Low     | Unclear | Unclear |
| Kim, 2009                 | Low     | Low     | Unclear | Low     | Low     | Low     | Low     | Unclear | Unclear |
| Riad, 2009                | Unclear | Low     | Unclear | Low     | Low     | Low     | Low     | Unclear | Low     |
| Rosow, 2009               | Unclear | High    | Unclear | Low     | Low     | Unclear | Low     | Unclear | High    |
| Aghadavoudi, 2008         | Low     | Unclear | Unclear | Low     | Low     | Low     | Low     | Unclear | Unclear |
| Bano, 2008                | Low     | Unclear | Unclear | Low     | Low     | Low     | Low     | Unclear | Unclear |
| Bhatia, 2008              | Unclear | Unclear | Unclear | Low     | Unclear | Unclear | Low     | Unclear | Unclear |
| Candiotti, 2008           | Low     | Low     | Low     | Low     | Low     | Unclear | Low     | Unclear | Unclear |
| Choi, 2008                | Low     | Low     | Unclear | Low     | Unclear | Low     | Low     | Unclear | Unclear |
| Contreras-Dominguez, 2008 | Unclear | Unclear | Unclear | Low     | Unclear | Low     | Low     | Unclear | Unclear |
| Cruz, 2008                | Unclear | Low     | Unclear | Low     | Unclear | Low     | Low     | Unclear | Unclear |
| Davis, 2008               | Low     | Low     | Unclear | Low     | High    | Low     | Low     | Unclear | Unclear |
| Erhan, 2008               | Unclear | Low     | Unclear | Low     | Unclear | Low     | Low     | Unclear | Unclear |
| Gautam, 2008              | Low     | Low     | Unclear | Low     | Low     | Low     | Low     | Unclear | Unclear |
| Gupta, 2008               | Unclear | Unclear | Unclear | Low     | Unclear | Low     | Low     | Unclear | Unclear |
| Kaki, 2008                | Unclear | Unclear | Unclear | Low     | Low     | Low     | Low     | Unclear | Unclear |
| Kovac, 2008               | Low     | Unclear | Unclear | Low     | Unclear | Unclear | Low     | Unclear | Unclear |
| Krobbuaban, 2008          | Low     | Low     | Unclear | Low     | Low     | Low     | Low     | Unclear | Unclear |
| Lee, 2008                 | Low     | Unclear | Unclear | Low     | Low     | Low     | Low     | Unclear | High    |
| Ng, 2008                  | Low     | Low     | Unclear | Low     | Unclear | Low     | Unclear | Unclear | High    |
| Olatosi, 2008             | Low     | Unclear | Unclear | Low     | Unclear | Low     | Unclear | Unclear | Unclear |
| Pan, 2008                 | Low     | Low     | Unclear | Low     | Low     | Unclear | Unclear | Unclear | Unclear |
| Piper, 2008               | Unclear | Low     | Unclear | Low     | Unclear | Low     | Low     | Low     | Low     |
| Said-Ahmed, 2008          | Unclear | Low     | Unclear | Low     | Unclear | Low     | Low     | Unclear | Unclear |
| Sajedi, 2008              | Low     | Unclear | Unclear | Low     | Low     | Low     | Unclear | Unclear | Unclear |
| Sakellaris, 2008          | Low     | Low     | Unclear | Low     | Unclear | Unclear | Low     | Unclear | Unclear |
| Schnaider, 2008           | Unclear | Unclear | Unclear | Low     | Unclear | Unclear | Unclear | Unclear | Unclear |
| Aouad, 2007               | Low     | Unclear | Unclear | Low     | High    | Low     | Low     | Unclear | Unclear |
| Balki, 2007               | Low     | Low     | Unclear | Low     | Low     | Unclear | Low     | Unclear | Unclear |
| Bestas, 2007              | Unclear | Unclear | Unclear | Low     | Low     | Low     | Low     | Unclear | Unclear |
| Bhatagnar, 2007           | Low     | Unclear | Unclear | Low     | Low     | Low     | Low     | Unclear | Unclear |
| Bolton, 2007              | Low     | Low     | Unclear | Low     | Unclear | Low     | Low     | Unclear | Unclear |
| Boonmak, 2007             | Low     | Unclear | Unclear | Low     | High    | Low     | Low     | Low     | Unclear |
| Candiotti, 2007           | Low     | Low     | Low     | High    | Low     | Unclear | Low     | Unclear | Unclear |
| Diemunsch, 2007           | Low     | Low     | Unclear | Low     | Unclear | Low     | Unclear | Low     | High    |
| Gan, 2007                 | Low     | Low     | Unclear | Low     | Low     | Low     | Low     | Unclear | Unclear |
| Gombar, 2007              | Low     | Low     | Unclear | Low     | Low     | Low     | Low     | Unclear | Unclear |
| Gulhas, 2007              | Low     | Low     | Unclear | Low     | Low     | Unclear | Low     | Unclear | Unclear |
| Han, 2007                 | Unclear | Unclear | Unclear | Low     | Low     | Low     | Unclear | Unclear | Unclear |
| Harnett, 2007             | Low     | Unclear | Unclear | Low     | Unclear | Unclear | Unclear | Unclear | Unclear |
| Kushwaha, 2007            | Unclear | Unclear | Unclear | Low     | Unclear | Unclear | Low     | Unclear | Unclear |
| Lee, 2007                 | Low     | Low     | Low     | Low     | Low     | Low     | Low     | Unclear | Low     |
| Moussa, 2007              | Low     | Low     | Unclear | Low     | Unclear | Low     | Low     | Unclear | Low     |
| Oksuz, 2007               | Unclear | Unclear | Unclear | Low     | Low     | Low     | Low     | Unclear | Low     |
| Paech, 2007               | Low     | Low     | Unclear | Low     | Low     | Low     | Low     | Unclear | Unclear |
| Rusch, 2007               | Low     | Unclear | Low     | Low     | Unclear | Low     | Unclear | Unclear | Low     |
| Sagir, 2007               | Low     | Low     | Unclear | Low     | Unclear | Low     | Low     | Unclear | Unclear |
| Sandhu, 2007              | Unclear | Low     | Unclear | Low     | Low     | Low     | Low     | Unclear | Unclear |
| Sarkar, 2007              | Unclear | Unclear | Unclear | Unclear | Unclear | Unclear | Unclear | Unclear | Unclear |
| Sharma, 2007              | Unclear | Unclear | Unclear | Low     | Unclear | High    | Unclear | Unclear | Unclear |
| Siddik-Sayyid, 2007       | Low     | Low     | Unclear | Low     | Low     | Low     | Low     | Unclear | Low     |
| Sodhi, 2007               | Unclear | Unclear | Unclear | Low     | Unclear | Unclear | Unclear | Unclear | Unclear |
| Sriraman, 2007            | Low     | Low     | Unclear | Low     | Unclear | Low     | Unclear | Unclear | Unclear |
| Subramaniam, 2007         | Low     | Low     | Unclear | Low     | Low     | Low     | Low     | Unclear | Unclear |
| Teran, 2007               | Low     | Unclear | Low     | Low     | Low     | High    | Unclear | Unclear | Unclear |
| White, 2007               | Low     | Low     | Unclear | Low     | Low     | Low     | Low     | Unclear | Unclear |
| Wig, 2007                 | Low     | Low     | Low     | Low     | Unclear | Unclear | Low     | Unclear | Low     |
| Akin, 2006                | Unclear | Unclear | Unclear | Low     | Unclear | Unclear | Low     | Unclear | Low     |
| Birmingham, 2006          | Unclear | Unclear | Unclear | Low     | Unclear | Low     | Low     | Unclear | Unclear |

|                                |         |         |         |         |         |         |         |         |         |
|--------------------------------|---------|---------|---------|---------|---------|---------|---------|---------|---------|
| Bridge, 2006                   | Unclear | Low     | Unclear | Low     | Unclear | Unclear | Low     | Unclear | Unclear |
| Chan, 2006                     | Low     | Low     | Low     | Low     | Low     | Low     | Low     | Unclear | Low     |
| Eberhart, 2006                 | Unclear | Low     | Low     | High    | Low     | Low     | Low     | Unclear | Unclear |
| Gunter, 2006                   | Low     | Low     | Unclear | Low     | Unclear | Low     | Low     | Unclear | Unclear |
| Gupta, 2006                    | High    | Unclear | Unclear | Unclear | Unclear | Unclear | Unclear | Unclear | Unclear |
| Isik, 2006                     | Unclear | Unclear | Low     | Low     | Unclear | Unclear | Low     | Unclear | Unclear |
| Janicki, 2006                  | Low     | Unclear | Unclear | Low     | Low     | Low     | Low     | Unclear | Unclear |
| Jellish, 2006                  | Low     | Unclear | Unclear | High    | Unclear | Low     | Low     | Unclear | Unclear |
| Johns, 2006                    | Low     | Unclear | Unclear | Low     | Low     | Unclear | Unclear | Low     | Unclear |
| Khan, 2006                     | Low     | Unclear | Unclear | Low     | Unclear | Unclear | Low     | Unclear | Unclear |
| Kolm, 2006                     | Unclear | Unclear | Unclear | Low     | Unclear | Unclear | Unclear | Unclear | Unclear |
| Leksowski, 2006                | Unclear | Unclear | Unclear | Unclear | Unclear | Low     | Unclear | Unclear | Unclear |
| Paranhos de Abreu, 2006        | Unclear | Unclear | Unclear | Low     | Unclear | Unclear | Low     | Unclear | Unclear |
| Peixoto, 2006                  | Unclear | Low     | Unclear | Low     | Low     | Low     | Low     | Unclear | Unclear |
| Purhonen, 2006a                | Low     | Unclear | Unclear | Low     | Low     | Low     | Low     | Unclear | Unclear |
| Purhonen, 2006b                | Low     | Low     | Low     | Low     | Unclear | Low     | Unclear | Unclear | Unclear |
| Sarvela, 2006                  | Unclear | Low     | Low     | Low     | High    | Low     | Low     | Unclear | Unclear |
| Tosun, 2006                    | Unclear | Unclear | Unclear | Low     | Unclear | Unclear | Unclear | Unclear | Unclear |
| Tseng, 2006                    | Low     | Low     | Unclear | Low     | Unclear | Low     | Low     | Unclear | Unclear |
| Veneziani, 2006                | Unclear | Unclear | Unclear | Low     | Unclear | Low     | Low     | Unclear | Unclear |
| White, 2006                    | Low     | Low     | Unclear | Low     | Low     | Low     | Low     | Unclear | Low     |
| Cohen, 2005                    | Unclear | Unclear | Unclear | Low     | Low     | Low     | Low     | Unclear | Unclear |
| D'Angelo, 2005                 | Low     | Low     | Unclear | High    | Low     | Low     | Low     | Unclear | Unclear |
| Demiraran, 2005                | Unclear | Unclear | Unclear | Low     | Low     | Low     | Unclear | Unclear | Unclear |
| Gan, 2005                      | Low     | Low     | Unclear | Low     | Low     | Low     | Low     | Unclear | Unclear |
| Hartsell, 2005                 | Unclear | Unclear | Unclear | Low     | High    | Unclear | Low     | Unclear | Unclear |
| Iatrou, 2005                   | Low     | Unclear | Unclear | Low     | High    | Low     | Unclear | Unclear | Unclear |
| Kabalak, 2005                  | Low     | Unclear | Unclear | Unclear | Low     | Unclear | Unclear | Unclear | Unclear |
| Khan, 2005                     | Unclear | Unclear | Unclear | Low     | Unclear | High    | Low     | Unclear | Unclear |
| Kocamanoglu, 2005              | Unclear | Unclear | Low     | Low     | Unclear | Low     | Low     | Unclear | Unclear |
| Kontrimaviciute, 2005          | Unclear | Unclear | Unclear | Low     | Unclear | Unclear | Unclear | Unclear | Unclear |
| Misra, 2005                    | Low     | Unclear | Unclear | Low     | Low     | Low     | Low     | Unclear | Unclear |
| Pirat, 2005                    | Unclear | Unclear | Unclear | Low     | Unclear | Low     | Low     | Unclear | Unclear |
| Treschan, 2005                 | Low     | Low     | Unclear | Low     | Unclear | Low     | Low     | Unclear | Unclear |
| White, 2005 <sup>†</sup>       | Unclear | Unclear | Unclear | Low     | Unclear | Unclear | Unclear | Unclear | Unclear |
| Alkaissi, 2004                 | Unclear | Low     | Unclear | Low     | Low     | Unclear | Low     | Unclear | Unclear |
| Apfel, 2004 (CR: Jokela, 2009) | Low     | Low     | Unclear | Unclear | Low     | Low     | Low     | Unclear | Low     |
| Barbone, 2004                  | Unclear | Unclear | Unclear | Unclear | Unclear | Low     | Low     | Unclear | Unclear |
| Barbosa, 2004                  | Unclear | Unclear | Unclear | Low     | Unclear | Unclear | Low     | Unclear | Unclear |
| Bhardwaj, 2004                 | Low     | Low     | Unclear | Low     | Unclear | Low     | Low     | Unclear | Unclear |
| Binstock, 2004                 | Unclear | Unclear | Unclear | High    | Low     | Unclear | Low     | Unclear | Unclear |
| Browning, 2004                 | Low     | Unclear | Unclear | Unclear | Unclear | Low     | Unclear | Unclear | Unclear |
| Celiker, 2004                  | Low     | Low     | Unclear | High    | Unclear | Unclear | Low     | Unclear | Unclear |
| Dua, 2004                      | Low     | Unclear | Unclear | Low     | Unclear | Low     | Low     | Unclear | Unclear |
| Eberhart, 2004                 | Unclear | Low     | Unclear | Low     | Low     | Low     | Low     | Unclear | Unclear |
| Gan, 2004                      | Unclear | Unclear | Unclear | Low     | Unclear | Unclear | Unclear | Unclear | Unclear |
| Han, 2004                      | Low     | Low     | Unclear | Unclear | Low     | Unclear | Unclear | Unclear | Unclear |
| Hanaoka, 2004                  | Unclear | Low     | Unclear | Low     | High    | Unclear | Unclear | Unclear | Unclear |
| Meyer, 2004                    | Low     | Low     | Unclear | Low     | High    | Low     | Low     | Unclear | Unclear |
| Panda, 2004                    | Low     | Unclear | Low     | Low     | Unclear | Low     | Low     | Unclear | Unclear |
| Samakarndi, 2004               | Unclear | Unclear | Low     | Unclear | Low     | Low     | Low     | Unclear | Unclear |
| Sinha, 2004                    | Low     | Unclear | Unclear | Low     | Low     | Low     | Low     | Unclear | Unclear |
| Bharti, 2003                   | Unclear | Unclear | Unclear | Low     | Unclear | Low     | Low     | Unclear | Unclear |
| Biswas, 2003a                  | Low     | Low     | Unclear | Unclear | Unclear | Low     | Low     | Unclear | Unclear |
| Biswas, 2003b                  | Low     | Low     | Unclear | Low     | Unclear | Low     | Low     | Unclear | Unclear |
| Burmeister, 2003               | Unclear | Unclear | Low     | Low     | Unclear | Unclear | Unclear | Unclear | Unclear |
| Charuluxananan, 2003           | Low     | Low     | Unclear | Low     | Low     | Low     | Low     | Unclear | Unclear |
| Karamanlioglu, 2003            | Low     | Low     | Unclear | Low     | Low     | Low     | Low     | Unclear | Unclear |
| Loewen, 2003                   | Low     | Low     | Unclear | Low     | Low     | Low     | Low     | Unclear | Unclear |
| Maddali, 2003                  | Low     | Low     | Unclear | Low     | Unclear | Low     | Low     | Unclear | Unclear |
| Madenoglu, 2003                | Unclear | Unclear | Unclear | Low     | Low     | Low     | Low     | Unclear | Unclear |
| O'Brien, 2003                  | Unclear | Unclear | Unclear | Unclear | Low     | Unclear | Low     | Unclear | Unclear |



|                          |         |         |         |         |         |         |         |         |         |
|--------------------------|---------|---------|---------|---------|---------|---------|---------|---------|---------|
| Olutoye, 2003            | Low     | Low     | Unclear | Low     | Unclear | Low     | Unclear | Unclear | Unclear |
| Oztekin, 2003            | Unclear | Low     | Unclear | Low     | Low     | Low     | Low     | Unclear | Unclear |
| Paech, 2003              | Low     | Low     | Unclear | Low     | Low     | Low     | Low     | Unclear | Unclear |
| Pan, 2003                | Unclear | Unclear | Unclear | Low     | Unclear | Unclear | Unclear | Unclear | Unclear |
| Samra, 2003 <sup>†</sup> | Unclear | Unclear | Unclear | Low     | Unclear | Low     | Low     | Unclear | Unclear |
| Szarvas, 2003            | Low     | Low     | Unclear | Low     | Low     | Unclear | Low     | Unclear | Unclear |
| Tang, 2003               | Low     | Low     | Unclear | Low     | Low     | Low     | Unclear | Unclear | Unclear |
| Thagaard, 2003           | Low     | Unclear | Unclear | High    | Low     | Unclear | Unclear | Unclear | Unclear |
| Tzeng, 2003              | Low     | Unclear | Unclear | Low     | Unclear | Low     | Low     | Unclear | Unclear |
| Usmani, 2003             | Unclear | Unclear | Unclear | Low     | Unclear | Unclear | Unclear | Unclear | Unclear |
| Wagner, 2003             | Unclear | Low     | Unclear | Low     | High    | Unclear | Unclear | Unclear | Unclear |
| Wattwil, 2003            | Low     | Unclear | Unclear | Low     | Low     | Unclear | Unclear | Unclear | Unclear |
| Yukse, 2003              | Unclear | Low     | Unclear | Low     | Unclear | Low     | Low     | Unclear | Unclear |
| Adducci, 2002            | Low     | Unclear | Unclear | Low     | Unclear | Low     | Low     | Unclear | Unclear |
| Agarwal, 2002            | Low     | Unclear | Unclear | Low     | Unclear | Low     | Low     | Unclear | Unclear |
| Arcioni, 2002            | Unclear | Unclear | Unclear | Low     | Low     | Low     | Low     | Unclear | Low     |
| Argiriadou, 2002         | Low     | Low     | Unclear | Low     | Unclear | Low     | Low     | Unclear | Unclear |
| Coloma, 2002             | Low     | Low     | Low     | Low     | Low     | Low     | Low     | Unclear | Unclear |
| Coloma, 2002             | Low     | Low     | Unclear | Low     | Unclear | Low     | Low     | Unclear | Low     |
| Elhakim, 2002            | Low     | Low     | Unclear | Low     | Unclear | Low     | Low     | Unclear | Unclear |
| Fabling, 2002            | Unclear | Low     | Unclear | Low     | Low     | Low     | Low     | Unclear | Unclear |
| Gan, 2002                | Unclear | Unclear | Unclear | Low     | Low     | Unclear | Unclear | Unclear | Unclear |
| Goksu, 2002              | Unclear | Unclear | Unclear | Low     | Low     | Low     | Low     | Unclear | Unclear |
| Grimsehl, 2002           | Low     | Low     | Unclear | Low     | Low     | Low     | Low     | Unclear | Unclear |
| Jokela, 2002             | Unclear | Unclear | Unclear | Low     | High    | Unclear | Low     | Unclear | Unclear |
| Lee, 2002                | Unclear | Unclear | Unclear | Low     | Unclear | Low     | Low     | Unclear | Unclear |
| Marcus, 2002             | Unclear | Unclear | Unclear | Unclear | Unclear | Unclear | Low     | Unclear | Unclear |
| Mullick, 2002            | Unclear | Unclear | Unclear | Low     | Low     | Unclear | Low     | Unclear | Unclear |
| Munro, 2002              | Low     | Unclear | Unclear | High    | High    | Low     | Low     | Unclear | Unclear |
| Ozmen, 2002              | Unclear | Unclear | Unclear | Low     | Unclear | Unclear | Unclear | Unclear | Unclear |
| Paech, 2002              | Unclear | Unclear | Low     | Low     | Low     | Low     | Low     | Unclear | Unclear |
| Quaynor, 2002            | Low     | Low     | Unclear | Low     | Low     | Low     | Low     | Unclear | Unclear |
| Sanchez-Ledesma, 2002    | Unclear | Low     | Unclear | Low     | Unclear | Low     | Low     | Unclear | Unclear |
| Sennaraj, 2002           | Low     | Low     | Unclear | Low     | Unclear | Low     | Low     | Unclear | Unclear |
| So, 2002                 | Low     | Unclear | Unclear | Low     | Low     | Low     | Unclear | Unclear | Unclear |
| Sukhani, 2002            | Unclear | Unclear | Unclear | Low     | Low     | Low     | Unclear | Unclear | Unclear |
| Wang, 2002a              | Low     | Low     | Unclear | Low     | Low     | Low     | Low     | Unclear | Unclear |
| Wang, 2002b              | Low     | Low     | Unclear | Low     | Low     | Low     | Low     | Unclear | Unclear |
| Wang, 2002               | Low     | Unclear | Unclear | Low     | Low     | Low     | Low     | Unclear | Low     |
| White, 2002              | Low     | Unclear | Low     | Low     | Unclear | Unclear | Low     | Unclear | Unclear |
| Yazigi, 2002             | Low     | Unclear | Unclear | Low     | Unclear | Low     | Unclear | Unclear | Unclear |
| Bowhay, 2001             | Low     | Low     | Unclear | Low     | Unclear | Low     | Low     | Unclear | Unclear |
| Cherian, 2001            | Low     | Unclear | Unclear | Unclear | Unclear | Low     | Low     | Unclear | Unclear |
| Dabbous, 2001            | Low     | Low     | Unclear | Low     | High    | Low     | Low     | Unclear | Unclear |
| De Witte, 2001           | Unclear | Unclear | Unclear | Low     | Unclear | Low     | Low     | Unclear | Unclear |
| Ganem, 2001              | Low     | Low     | Unclear | Low     | Low     | Low     | Low     | Unclear | Unclear |
| Goll, 2001               | Low     | Unclear | Unclear | Low     | Unclear | Low     | Low     | Unclear | Unclear |
| Kathirvel, 2001          | Low     | Unclear | Unclear | Low     | Unclear | Low     | Low     | Unclear | Unclear |
| Millo, 2001              | Low     | Low     | Unclear | Low     | Low     | Low     | Low     | Unclear | Unclear |
| Pan, 2001                | Low     | Low     | Unclear | Low     | Low     | Low     | Low     | Unclear | High    |
| Paventi, 2001            | Unclear | Unclear | Unclear | Low     | Unclear | Low     | Low     | Unclear | Unclear |
| Shende, 2001             | Low     | Unclear | Unclear | Low     | Unclear | Low     | Unclear | Low     | Unclear |
| Somri, 2001              | Low     | Unclear | Unclear | Low     | Unclear | Unclear | Unclear | Unclear | Unclear |
| Splinter, 2001           | Unclear | Unclear | Unclear | Low     | Unclear | Low     | Unclear | Unclear | Unclear |
| Subramaniam, 2001        | Low     | Low     | Unclear | Low     | Low     | Low     | Low     | Unclear | Unclear |
| Thomas, 2001             | Low     | Low     | Unclear | Low     | Unclear | Low     | Low     | Unclear | Low     |
| White, 2001              | Low     | Low     | Unclear | Low     | Low     | Unclear | Unclear | Unclear | Low     |
| Wilson, 2001             | Unclear | Low     | Unclear | Low     | Low     | Unclear | Unclear | Unclear | Unclear |
| Yilmazlar, 2001          | Unclear | Unclear | Unclear | Low     | Unclear | Low     | Unclear | Unclear | Unclear |
| Ahmed, 2000              | Low     | Unclear | Unclear | Low     | Low     | Low     | Low     | Unclear | Unclear |
| Charuluxananan, 2000     | Low     | Low     | Unclear | Low     | Unclear | Unclear | Low     | Unclear | Unclear |
| Fabling, 2000            | Unclear | Low     | Unclear | Low     | Unclear | Unclear | Low     | Unclear | Unclear |
| Gesztési, 2000           | Low     | Low     | Low     | Low     | Low     | Low     | Low     | Unclear | Low     |
| Holt, 2000               | Low     | Low     | Unclear | Low     | Low     | Low     | Low     | Unclear | Unclear |

|                   |         |         |         |         |         |         |         |         |         |
|-------------------|---------|---------|---------|---------|---------|---------|---------|---------|---------|
| Jensen, 2000      | Low     | Unclear | Unclear | Unclear | Low     | Low     | Low     | Unclear | Low     |
| Jokela, 2000      | Unclear | Unclear | Unclear | Low     | Low     | Low     | Low     | Unclear | Unclear |
| Kothari, 2000     | Low     | Unclear | Unclear | Low     | High    | Low     | Low     | Unclear | High    |
| Kreisler, 2000    | Unclear | Unclear | Unclear | Low     | High    | Low     | Low     | Unclear | High    |
| Ku, 2000          | Unclear | Unclear | Unclear | Unclear | Low     | Unclear | Low     | Unclear | Unclear |
| Lee, 2000         | Low     | Unclear | Unclear | Unclear | High    | Low     | Low     | Unclear | Unclear |
| Liberman, 2000    | Low     | Low     | Unclear | Low     | Unclear | Low     | Unclear | Unclear | Unclear |
| Najeeb, 2000      | Unclear | Unclear | Unclear | High    | Unclear | Unclear | Unclear | Unclear | Unclear |
| Peixoto, 2000     | Unclear | Low     | Unclear | Low     | Unclear | Unclear | Low     | Unclear | Low     |
| Philip, 2000      | Unclear | Unclear | Unclear | Low     | Low     | Unclear | Low     | Unclear | Low     |
| Reihner, 2000     | Unclear | Low     | Unclear | Low     | Low     | Low     | Low     | Unclear | Unclear |
| Sadhasivam, 2000  | Low     | Low     | Unclear | Low     | Low     | Low     | Low     | Unclear | Unclear |
| Scuderi, 2000     | Unclear | Unclear | Low     | Unclear | Unclear | High    | Unclear | Unclear | Unclear |
| Sharma, 2000      | Unclear | Unclear | Unclear | Low     | Unclear | Low     | Unclear | Unclear | Unclear |
| Wu, 2000          | Low     | Unclear | Unclear | Low     | Low     | Low     | Unclear | Unclear | Unclear |
| Zarate, 2000      | Low     | Unclear | Unclear | Low     | Low     | Low     | Unclear | Unclear | Unclear |
| Abouleish, 1999   | Low     | Unclear | Low     | Unclear | Low     | Low     | Low     | Unclear | High    |
| Allen, 1999       | Low     | Unclear | Unclear | Low     | Low     | Low     | Low     | Unclear | Unclear |
| Barst, 1999       | Low     | Low     | Unclear | Low     | Low     | Low     | Unclear | Unclear | Unclear |
| Broome, 1999      | Unclear | Unclear | Unclear | Low     | High    | Unclear | Unclear | Unclear | Unclear |
| Bugedo, 1999      | Low     | Low     | Unclear | Low     | Unclear | Unclear | Low     | Unclear | Low     |
| Cholwill, 1999    | Unclear | Unclear | Unclear | Low     | Low     | Low     | Low     | Unclear | Unclear |
| de Adana, 1999    | Low     | Low     | Unclear | Low     | High    | Low     | Low     | Unclear | Low     |
| Gurler, 1999      | Unclear | Unclear | Unclear | Unclear | Unclear | Unclear | Unclear | Unclear | Unclear |
| Helmy, 1999       | Unclear | Unclear | Unclear | Unclear | Low     | Unclear | Low     | Unclear | Unclear |
| Janknegt, 1999    | Low     | Unclear | Low     | Low     | Unclear | Low     | Unclear | Unclear | Unclear |
| Jokela, 1999      | Unclear | Low     | Unclear | Low     | Unclear | Unclear | Low     | Unclear | Unclear |
| Kathirvel, 1999   | Unclear | Unclear | Unclear | Low     | Unclear | Low     | Low     | Unclear | Unclear |
| Khalil, 1999      | Low     | Unclear | Unclear | Low     | Unclear | Low     | Low     | Unclear | Unclear |
| Koivuranta, 1999  | Unclear | Unclear | Low     | Unclear | Low     | Low     | Low     | Unclear | Unclear |
| Kovac, 1999       | Low     | Unclear | Unclear | Low     | Low     | Unclear | Unclear | Unclear | Unclear |
| Kyokong, 1999     | Unclear | Low     | Unclear | Unclear | Low     | Low     | Low     | Unclear | Unclear |
| McCall, 1999      | Unclear | Unclear | Unclear | Low     | Unclear | Low     | Low     | Unclear | Unclear |
| Munro, 1999       | Low     | Low     | Unclear | Low     | Low     | Unclear | Unclear | Unclear | Unclear |
| Rajeeva, 1999     | Low     | Unclear | Unclear | Low     | Unclear | Unclear | Low     | Unclear | Unclear |
| Sadhasivam, 1999  | Unclear | Unclear | Unclear | Low     | Low     | Unclear | Low     | Unclear | High    |
| Sandhu, 1999      | Unclear | Low     | Unclear | Low     | Unclear | Low     | Unclear | Unclear | Unclear |
| Scuderi, 1999a    | Unclear | Unclear | Low     | Low     | Low     | Low     | Low     | Unclear | Unclear |
| Scuderi, 1999b    | Unclear | Unclear | Unclear | Low     | Low     | Low     | Low     | Unclear | Unclear |
| Sinha, 1999       | Low     | Unclear | Unclear | Low     | High    | Low     | Low     | Unclear | Unclear |
| Swiatkowski, 1999 | Unclear | Unclear | Unclear | Low     | Unclear | Low     | Low     | Unclear | Unclear |
| Tsui, 1999        | Unclear | Unclear | Unclear | Low     | Unclear | Low     | Unclear | Unclear | Low     |
| Turhanoglu, 1999  | Unclear | Unclear | Unclear | Low     | Unclear | Unclear | Unclear | Unclear | Unclear |
| Wagley, 1999      | Low     | Unclear | Unclear | Low     | Unclear | Unclear | Low     | Unclear | Unclear |
| Woodward, 1999    | Unclear | Low     | Unclear | Low     | High    | Low     | Low     | Unclear | Unclear |
| Alon, 1998        | Low     | Low     | Unclear | Low     | Low     | Unclear | Low     | Unclear | Unclear |
| Ang, 1998         | Low     | Low     | Unclear | Low     | Low     | Low     | Unclear | Unclear | Unclear |
| Bacic, 1998       | Unclear | Unclear | Unclear | Unclear | Low     | Unclear | Low     | Unclear | Unclear |
| Chan, 1998        | Low     | Unclear | Low     | Low     | Low     | Low     | Unclear | Unclear | Unclear |
| Chen, 1998a       | Low     | Low     | Unclear | Low     | Low     | Low     | Low     | Unclear | Unclear |
| Chen, 1998b       | Unclear | Unclear | Unclear | Low     | Low     | Low     | Low     | Unclear | Unclear |
| Dabbous, 1998     | Low     | Unclear | Unclear | Unclear | Unclear | Low     | Low     | Unclear | Unclear |
| Daftary, 1998     | Unclear | Low     | Unclear | Low     | Unclear | Unclear | Low     | Unclear | Unclear |
| Dershwitz, 1998   | Low     | Low     | Unclear | Low     | Unclear | Low     | Low     | Unclear | Unclear |
| Diemunsch, 1998   | Unclear | Unclear | Unclear | Low     | Low     | Unclear | Low     | Unclear | Unclear |
| Doe, 1998         | Unclear | Unclear | Unclear | Unclear | Low     | Unclear | Low     | Unclear | Unclear |
| Dresner, 1998     | Unclear | Unclear | Unclear | Low     | Unclear | Low     | Low     | Unclear | Unclear |
| Goodarzi, 1998    | Unclear | Unclear | Unclear | Low     | Low     | Low     | Low     | Unclear | Unclear |
| Hamid, 1998       | Low     | Low     | Unclear | Low     | Low     | Low     | Low     | Unclear | Unclear |
| Jellish, 1998     | Unclear | Low     | Unclear | High    | Unclear | Unclear | Low     | Unclear | Unclear |
| Mitra, 1998       | Unclear | Unclear | Unclear | Low     | Unclear | Unclear | Low     | Unclear | Unclear |
| Morris, 1998      | Unclear | Unclear | Unclear | Low     | Unclear | Unclear | Unclear | Unclear | Unclear |
| Scholz, 1998      | Unclear | Low     | Unclear | Low     | Low     | Unclear | Unclear | Unclear | Unclear |
| Splinter, 1998a   | Low     | Unclear | Unclear | Low     | Low     | Unclear | Unclear | Unclear | Unclear |
| Splinter, 1998b   | Unclear | Low     | Unclear | Low     | Low     | Low     | Low     | Unclear | Unclear |
| Tang, 1998a       | Unclear | Low     | Low     | Low     | Unclear | Unclear | Low     | Unclear | Unclear |

|                                  |         |         |         |         |         |         |         |         |         |
|----------------------------------|---------|---------|---------|---------|---------|---------|---------|---------|---------|
| Tang, 1998b                      | Low     | Low     | Low     | Unclear | Unclear | Low     | Low     | Unclear | Unclear |
| Tramer, 1998                     | Low     | Unclear | Unclear | Low     | Unclear | Low     | Low     | Unclear | Unclear |
| Akabay, 1997                     | Unclear | Unclear | Unclear | Unclear | Unclear | Low     | Unclear | Unclear | Unclear |
| Alexander, 1997                  | Low     | Low     | Unclear | Low     | High    | Low     | Low     | Unclear | Unclear |
| Ascaso, 1997                     | Unclear | Unclear | Unclear | Low     | Unclear | Low     | Low     | Unclear | Unclear |
| Bach-Styles, 1997                | Unclear | Unclear | Unclear | Low     | Unclear | Low     | Low     | Unclear | Unclear |
| Carnahan, 1997                   | Unclear | Unclear | Unclear | Low     | Unclear | Unclear | Low     | Unclear | Low     |
| Diemunsch, 1997a                 | Unclear | Unclear | Low     | Low     | Low     | Low     | Low     | Unclear | High    |
| Diemunsch, 1997b                 | Unclear | Low     | Low     | Low     | Unclear | Unclear | Low     | Unclear | Unclear |
| Diemunsch, 1997c                 | Unclear | Unclear | Low     | Low     | Unclear | Unclear | Low     | Unclear | Unclear |
| Graczyk, 1997                    | Unclear | Low     | Unclear | Low     | Low     | Low     | Low     | Unclear | Unclear |
| Klockgether-Radke, 1997          | Unclear | Unclear | Unclear | Low     | Unclear | Unclear | Low     | Unclear | Unclear |
| Koivuranta, 1997                 | Low     | Unclear | Unclear | High    | Low     | Low     | Low     | Unclear | Unclear |
| Korttila, 1997                   | Unclear | Unclear | Unclear | Low     | Low     | Unclear | Unclear | Unclear | Unclear |
| Kovac, 1997                      | Low     | Low     | Low     | High    | Low     | Unclear | Low     | Unclear | Unclear |
| Lawhorn, 1997                    | Low     | Unclear | Unclear | Unclear | Unclear | Unclear | Unclear | Unclear | Unclear |
| Maestre, 1997                    | Unclear | Unclear | Unclear | Low     | Unclear | Unclear | Unclear | Unclear | Unclear |
| McKenzie, 1997                   | Low     | Low     | Unclear | Low     | Unclear | Unclear | Low     | Unclear | Unclear |
| Mikawa, 1997                     | Unclear | Unclear | Low     | Low     | Unclear | Low     | Low     | Unclear | Unclear |
| Moens, 1997                      | Unclear | Unclear | Unclear | Low     | Low     | Unclear | Low     | Unclear | Unclear |
| Monagle, 1997                    | Unclear | Low     | Low     | Low     | Low     | Low     | Unclear | Unclear | Unclear |
| Morton, 1997                     | Unclear | Unclear | Unclear | Low     | Low     | Unclear | Low     | Unclear | Unclear |
| Patel, 1997                      | Unclear | Unclear | Unclear | Low     | Low     | Low     | Low     | Unclear | Unclear |
| Pitkanen, 1997                   | Unclear | Unclear | Unclear | Low     | Unclear | Unclear | Low     | Unclear | Unclear |
| Polati, 1997                     | Unclear | Low     | Low     | Low     | Low     | Low     | Low     | Unclear | Unclear |
| Purhonen, 1997                   | Unclear | Low     | Low     | Low     | Low     | Low     | Unclear | Unclear | Unclear |
| Rung, 1997                       | Low     | Low     | Low     | Low     | Unclear | Unclear | Low     | Unclear | Unclear |
| Scuderi, 1997                    | Low     | Unclear | Unclear | Low     | Unclear | Unclear | Low     | Unclear | Unclear |
| Shende, 1997                     | Unclear | Unclear | Unclear | Low     | Unclear | Low     | Low     | Unclear | Unclear |
| Sniadach, 1997                   | Unclear | Low     | Unclear | Low     | Unclear | Low     | Low     | Unclear | Unclear |
| Splinter, 1997                   | Low     | Unclear | Unclear | Low     | Low     | Low     | Unclear | Unclear | Unclear |
| Stienstra, 1997                  | Low     | Low     | Low     | Low     | Unclear | Unclear | Low     | Unclear | Unclear |
| Sun, 1997                        | Unclear | Low     | Unclear | High    | Unclear | Low     | Unclear | Unclear | Unclear |
| Taylor, 1997                     | Low     | Unclear | Low     | Low     | High    | Unclear | Unclear | Unclear | Unclear |
| Ulusoy, 1997                     | Unclear | Unclear | Unclear | Unclear | Unclear | Unclear | Low     | Unclear | Unclear |
| Warriner, 1997                   | Unclear | Unclear | Unclear | Low     | Low     | Unclear | Low     | Unclear | Unclear |
| Ali-melkkila, 1996               | Unclear | Unclear | Unclear | Low     | Low     | Unclear | Low     | Unclear | Unclear |
| Alon, 1996                       | Unclear | Unclear | Unclear | Low     | Low     | Unclear | Low     | Unclear | Unclear |
| Capouet, 1996                    | Unclear | Low     | Unclear | Low     | Unclear | Unclear | Low     | Unclear | Unclear |
| Chen, 1996                       | Unclear | Unclear | Unclear | Unclear | Low     | Low     | Low     | Unclear | Unclear |
| Cieslak, 1996                    | Low     | Low     | Unclear | Low     | Unclear | Low     | Low     | Unclear | Unclear |
| Davies, 1996                     | Low     | Unclear | Unclear | Low     | Low     | Low     | Low     | Unclear | Unclear |
| Ercelen, 1996                    | Unclear | Low     | Unclear | Low     | Unclear | Low     | Low     | Unclear | Unclear |
| Eriksson, 1996                   | Unclear | Unclear | Unclear | Low     | Low     | Low     | Unclear | Unclear | Unclear |
| Furst, 1996                      | Unclear | Low     | Unclear | Low     | Low     | Low     | Low     | Unclear | Unclear |
| Gaynes, 1996 <sup>†</sup>        | Unclear | Unclear | Unclear | Unclear | Unclear | Unclear | Unclear | Unclear | Unclear |
| Honkavaara, 1996                 | Unclear | Unclear | Unclear | Low     | Unclear | Low     | Unclear | Unclear | Unclear |
| Kaul, 1996                       | Unclear | Low     | Unclear | Low     | Unclear | Unclear | Low     | Unclear | Unclear |
| Khalil, 1996                     | Low     | Unclear | Low     | Low     | Low     | Unclear | Low     | Unclear | Unclear |
| Kimya, 1996                      | Unclear | Unclear | Unclear | Low     | Unclear | Unclear | Low     | Unclear | Unclear |
| Koivuranta, 1996                 | Low     | Low     | Low     | High    | Unclear | Low     | Low     | Unclear | Unclear |
| Kovac, 1996 (CR: Pearman, 1994c) | Unclear | Unclear | Unclear | Low     | Unclear | Unclear | Low     | Unclear | Unclear |
| Kumar, 1996                      | Unclear | Unclear | Unclear | Low     | Unclear | Low     | Low     | Unclear | Unclear |
| Lawhorn, 1996                    | Unclear | Unclear | Unclear | Unclear | Unclear | Unclear | Unclear | Unclear | Unclear |
| Lekprasert, 1996                 | Unclear | Unclear | Unclear | Low     | Unclear | Unclear | Unclear | Unclear | Unclear |
| Lopez-Orlaondo, 1996             | Unclear | Unclear | Unclear | Low     | Unclear | Low     | Unclear | Unclear | Unclear |
| Naguib, 1996                     | Unclear | Low     | Unclear | Low     | Unclear | Low     | Low     | Unclear | Unclear |
| Pan, 1996                        | Low     | Unclear | Unclear | Low     | Unclear | Low     | Unclear | Unclear | Unclear |
| Principi, 1996                   | Unclear | Unclear | Unclear | Low     | Low     | Unclear | Low     | Unclear | Unclear |
| Pueyo, 1996                      | Unclear | Low     | Unclear | Low     | Low     | Low     | Low     | Unclear | Unclear |
| Pugh, 1996                       | Unclear | Unclear | Unclear | Low     | Unclear | Unclear | Low     | Unclear | Unclear |
| Rodrigo, 1996                    | Low     | Unclear | Unclear | Low     | Low     | Low     | Low     | Unclear | Unclear |
| Rose, 1996a                      | Unclear | Low     | Unclear | Low     | Low     | Low     | Low     | Unclear | Unclear |

|                                                    |         |         |         |         |         |         |         |         |         |
|----------------------------------------------------|---------|---------|---------|---------|---------|---------|---------|---------|---------|
| Rose, 1996b                                        | Low     | Low     | Unclear | Low     | Unclear | Low     | Low     | Unclear | Unclear |
| Stene, 1996                                        | Low     | Low     | Unclear | Low     | Unclear | Low     | Low     | Unclear | Unclear |
| Tang, 1996                                         | Low     | Low     | Unclear | Low     | High    | Low     | Unclear | Unclear | Unclear |
| Usha, 1996                                         | Unclear | Unclear | Unclear | Unclear | Unclear | Unclear | Unclear | Unclear | Unclear |
| Van Den Berg, 1996a                                | Unclear | Unclear | Unclear | Low     | Low     | Low     | Low     | Unclear | Unclear |
| Van Den Berg, 1996b                                | Unclear | Unclear | Unclear | Low     | High    | Unclear | Low     | Unclear | Unclear |
| Van Den Berg, 1996c                                | Unclear | Unclear | Unclear | Low     | Low     | Low     | Low     | Unclear | Unclear |
| Watts, 1996                                        | Unclear | Low     | Unclear | Low     | Unclear | Low     | Low     | Unclear | Unclear |
| Wilson, 1996                                       | Low     | Low     | Unclear | Low     | Unclear | Unclear | Low     | Unclear | Low     |
| Wrench, 1996                                       | Unclear | Unclear | Unclear | Low     | Unclear | Low     | Low     | Unclear | Unclear |
| Yilmazlar, 1996                                    | Unclear | Unclear | Unclear | Low     | Unclear | Unclear | Low     | Unclear | Unclear |
| Alexander, 1995                                    | Unclear | Unclear | Unclear | Low     | Unclear | Low     | Low     | Unclear | Unclear |
| Campbell, 1995                                     | Unclear | Unclear | Low     | Low     | Unclear | Unclear | Low     | Unclear | Unclear |
| Davis, 1995a                                       | Unclear | Unclear | Unclear | Low     | Unclear | Low     | Low     | Unclear | Unclear |
| Davis, 1995b                                       | Low     | Low     | Unclear | Low     | Low     | Low     | Low     | Unclear | Unclear |
| Desilva, 1995                                      | Unclear | Low     | Low     | Low     | High    | Low     | Low     | Unclear | Unclear |
| Elhakim, 1995                                      | Unclear | Low     | Unclear | Low     | Unclear | Low     | Low     | Unclear | Unclear |
| Grond, 1995                                        | Low     | Low     | Unclear | Low     | Low     | Low     | Low     | Unclear | Unclear |
| Litman, 1995                                       | Low     | Unclear | Unclear | Low     | Unclear | Unclear | Unclear | Unclear | Unclear |
| Mikawa, 1995                                       | Unclear | Unclear | Low     | Low     | Unclear | Low     | Low     | Unclear | Unclear |
| Paech, 1995                                        | Low     | Unclear | Unclear | Low     | Low     | Unclear | Low     | Unclear | Unclear |
| Paxton, 1995a                                      | Unclear | Unclear | Unclear | Low     | Unclear | Unclear | Low     | Unclear | Low     |
| Paxton, 1995b                                      | Unclear | Unclear | Unclear | Low     | Unclear | Unclear | Low     | Unclear | Low     |
| Splinter, 1995a                                    | Unclear | Unclear | Unclear | Low     | Unclear | Unclear | Unclear | Unclear | Unclear |
| Splinter, 1995b                                    | Unclear | Unclear | Unclear | Unclear | Unclear | Low     | Low     | Unclear | Unclear |
| Watcha, 1995                                       | Low     | Low     | Unclear | Low     | Unclear | Unclear | Low     | Unclear | Unclear |
| Furst, 1994                                        | Unclear | Low     | Unclear | Low     | Unclear | Low     | Low     | Unclear | Unclear |
| Gan, 1994                                          | Unclear | Unclear | Unclear | Low     | Low     | Unclear | Low     | Unclear | Unclear |
| Kaufmann, 1994                                     | Low     | Low     | Unclear | High    | Low     | Low     | Low     | Unclear | Unclear |
| Khalil, 1994 (CR: Pearman, 1994b)                  | Unclear | Unclear | Unclear | Low     | Unclear | Low     | Unclear | Unclear | High    |
| Litman, 1994                                       | Low     | Low     | Unclear | Low     | Unclear | Low     | Unclear | Unclear | Unclear |
| Malins, 1994                                       | Unclear | Low     | Unclear | Low     | Low     | Low     | Low     | Unclear | Unclear |
| McKenzie, 1994                                     | Unclear | Unclear | Unclear | Low     | Unclear | Unclear | Low     | Unclear | Unclear |
| Rodrigo, 1994                                      | Low     | Unclear | Unclear | Low     | Low     | Low     | Low     | Unclear | Unclear |
| Rose, 1994                                         | Low     | Unclear | Unclear | Low     | Low     | Low     | Low     | Unclear | Unclear |
| Suen, 1994                                         | Unclear | Unclear | Unclear | Low     | Low     | Low     | Low     | Unclear | Unclear |
| Ummenhofer, 1994                                   | Low     | Low     | Unclear | Low     | Unclear | Low     | Low     | Unclear | Unclear |
| Volpe, 1994                                        | Unclear | Unclear | Unclear | Low     | Unclear | Low     | Low     | Unclear | Unclear |
| Dupeyron, 1993                                     | Unclear | Unclear | Unclear | Low     | Unclear | Unclear | Low     | Unclear | Unclear |
| Helmers, 1993                                      | Unclear | Unclear | Unclear | Low     | Low     | Unclear | Unclear | Unclear | Unclear |
| McKenzie, 1993b (CR: Dershwitz, 1992)              | Unclear | Unclear | Unclear | Low     | High    | Unclear | Unclear | Unclear | High    |
| Raphael, 1993                                      | Unclear | Unclear | Low     | Low     | Low     | Unclear | Unclear | Unclear | Unclear |
| Sung, 1993                                         | Low     | Low     | Unclear | High    | Low     | Low     | Unclear | Unclear | Unclear |
| Zomers, 1993                                       | Unclear | Unclear | Unclear | Low     | Low     | Unclear | Low     | Unclear | Unclear |
| Alon, 1992                                         | Unclear | Unclear | Low     | Low     | Low     | Low     | Low     | Unclear | Unclear |
| Du Pen, 1992 (CR: Scuderi, 1993)                   | Unclear | Unclear | Low     | High    | Unclear | Unclear | Low     | Unclear | Unclear |
| Kenny, 1992                                        | Unclear | Unclear | Unclear | Low     | Low     | Low     | Low     | Unclear | Unclear |
| Kovac, 1992 (CRs: McKenzie, 1993a; Pearman, 1994a) | Unclear | Unclear | Low     | Low     | Low     | Unclear | Low     | Unclear | Unclear |
| Bodner, 1991                                       | Low     | Unclear | Unclear | High    | Unclear | Unclear | Low     | Unclear | High    |
| Larijani, 1991                                     | Low     | Unclear | Unclear | Low     | Unclear | Unclear | Low     | Unclear | Unclear |
| Leeser, 1991                                       | Low     | Unclear | Unclear | Low     | Unclear | Low     | Low     | Unclear | Unclear |

*Non-randomized clinical trials (n=5)*

|               |      |      |         |         |         |         |         |         |         |
|---------------|------|------|---------|---------|---------|---------|---------|---------|---------|
| Stamer, 2011  | High | High | Unclear | Low     | Low     | High    | Unclear | Unclear | High    |
| Rabbani, 2010 | High | High | Unclear | Unclear | Unclear | Unclear | Unclear | Unclear | Unclear |
| Kim, 2007     | High | High | Unclear | Low     | Unclear | Unclear | Unclear | Unclear | Unclear |
| Biedler, 2004 | High | High | Unclear | High    | Low     | Unclear | Low     | Unclear | High    |
| Manani, 1996  | High | High | Unclear | Low     | Unclear | Unclear | Unclear | Unclear | Unclear |

---

*Controlled before-after studies (n=1)*

Wagner, 2007            High            High            Unclear            High            High            High            Unclear            Unclear            High

---

**Note:** †Unpublished data.

**Abbreviations:** CR, companion report; EPOC, Effective Practice and Organization of Care; High, high risk; Low, low risk; Unclear, unclear risk .

**Items:**

1. Random sequence generation
  2. Allocation concealment
  3. Similar baseline outcome measures
  4. Similar baseline characteristics
  5. Incomplete outcome data
  6. Blinding of outcome assessor
  7. Contamination
  8. Selective outcome reporting
  9. Other bias
-

**Appendix 8. Aggregate EPOC risk-of-bias appraisal results**

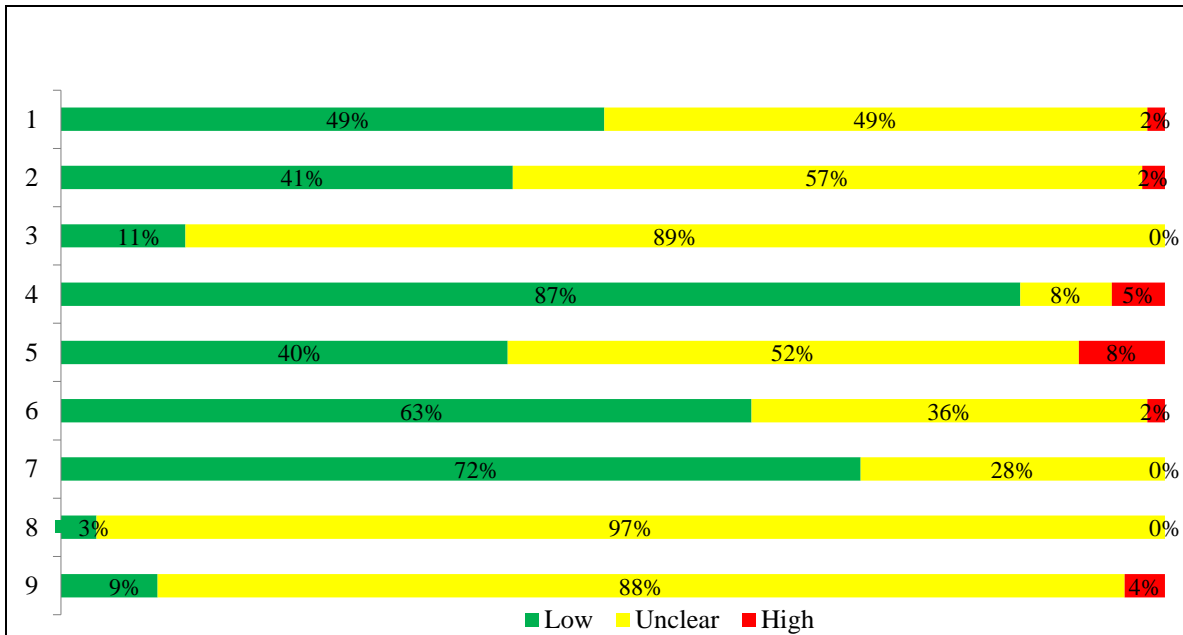

**Abbreviations:** EPOC, Effective Practice and Organization of Care; High, High risk of bias; Low, Low risk of bias; Unclear, Unclear risk of bias.

**Items:**

1. Random sequence generation
2. Allocation concealment
3. Similar baseline outcome measures
4. Similar baseline characteristics
5. Incomplete outcome data
6. Blinding
7. Contamination
8. Selective outcome reporting
9. Other bias

**Appendix 9. Newcastle-Ottawa Scale appraisal results**

| <b>Author, year</b> | <b>1</b> | <b>2</b> | <b>3</b> | <b>4</b> | <b>5</b> | <b>6</b> | <b>7</b> |
|---------------------|----------|----------|----------|----------|----------|----------|----------|
| Shakeel, 2012       | B        | A        | A        | B        | A        | B        | D        |
| Chen, 2011          | B        | A        | A        | B        | A        | B        | D        |
| Eryilmaz, 2008      | B        | A        | D        | B        | C        | C        | D        |
| Habib, 2007         | B        | A        | A        | B        | C        | B        | D        |
| Flynn, 2006         | B        | A        | A        | B        | C        | B        | D        |
| Piwko, 2005         | B        | A        | A        | B        | C        | B        | D        |
| Wang, 2005          | A        | A        | A        | B        | A        | D        | D        |
| Walker, 2001        | B        | A        | A        | B        | C        | D        | D        |
| O'Brien, 2000       | B        | A        | D        | B        | C        | D        | D        |

**Items:**

1. Representativeness of the exposed cohort: A, truly representative of the average participant undergoing surgery; B, somewhat representative of the average undergoing surgery.
2. Selection of the non-exposed cohort: A, drawn from the same community as the exposed cohort.
3. Ascertainment of exposure: A, secure records (e.g. medical records); D, no description.
4. Demonstration that outcome of interest was not present at start of study: B, no.
5. Comparability of cohorts on the basis of the design or analysis: A, study controls for most important factors (e.g., age, gender); C, nothing is controlled for.
6. Assessment of outcome: B, record linkage/questionnaire; C, self-report; D, no description.
7. Adequacy of follow up of cohorts: D, no statement.

Appendix 10. Comparison adjusted funnel plots

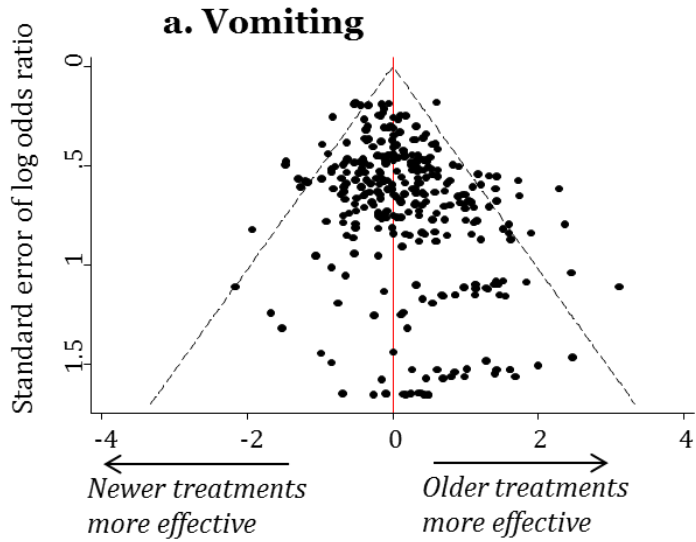

Log odds ratio centered at comparison-specific pooled effect

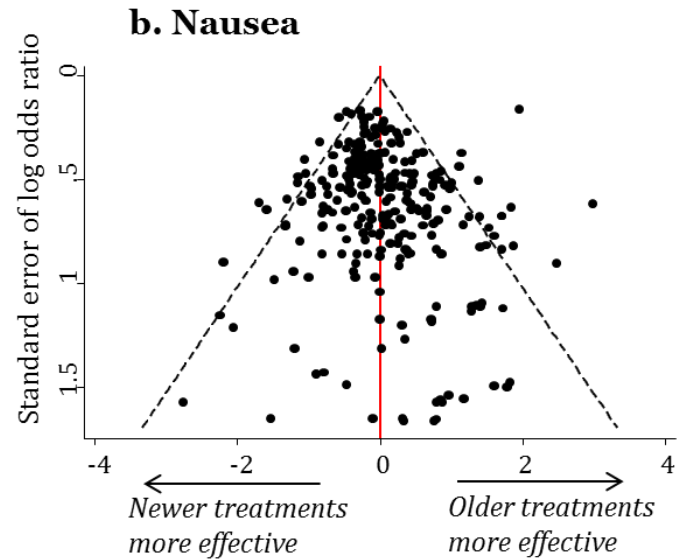

Log odds ratio centered at comparison-specific pooled effect

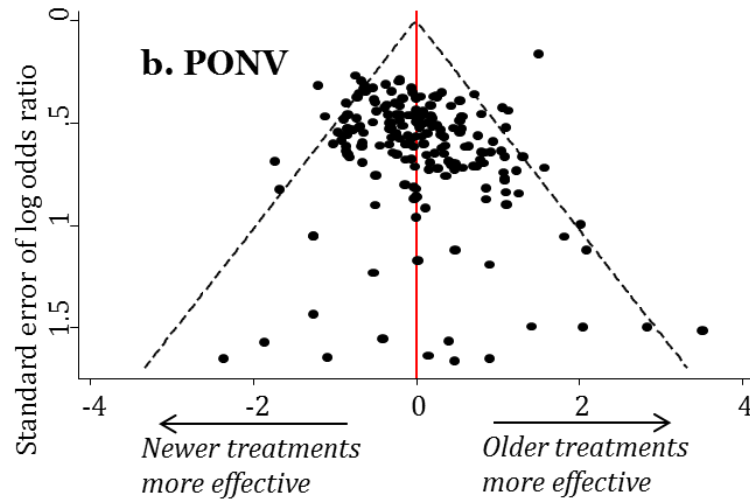

Log odds ratio centered at comparison-specific pooled effect



**Appendix 11: Network meta-analysis results for patients of all ages and children only for all time periods**

| <i>Treatment Comparison</i>     | <i># of studies</i>                                       | <i>MA estimate:<br/>OR (95% CI)</i> | <i>Heterogeneity<br/>variance</i> | <i>NMA estimate:<br/>OR (95% CI)</i> | <i># of studies</i>                                     | <i>MA estimate:<br/>OR (95% CI)</i> | <i>Heterogeneity<br/>variance</i> | <i>NMA estimate:<br/>OR (95% CI)</i> |
|---------------------------------|-----------------------------------------------------------|-------------------------------------|-----------------------------------|--------------------------------------|---------------------------------------------------------|-------------------------------------|-----------------------------------|--------------------------------------|
|                                 | <b>Vomiting (all ages) - 238 RCTs and 12,781 patients</b> |                                     |                                   |                                      | <b>Vomiting (children) - 46 RCTs and 1,830 patients</b> |                                     |                                   |                                      |
| Ondansetron vs Placebo          | 146                                                       | 0.35 (0.32–0.39)                    | 0.093                             | 0.36 (0.33–0.40)                     | 34                                                      | 0.30 (0.24–0.38)                    | 0.181                             | 0.30 (0.24–0.38)                     |
| Granisetron vs Placebo          | 27                                                        | 0.24 (0.16–0.34)                    | 0.446                             | 0.26 (0.21–0.34)                     | 4                                                       | 0.21 (0.08–0.56)                    | 0.637                             | 0.23 (0.12–0.48)                     |
| Dolasetron vs Placebo           | 7                                                         | 0.42 (0.21–0.83)                    | 0.581                             | 0.44 (0.30–0.63)                     | 3                                                       | 0.41 (0.23–0.75)                    | 0.000                             | 0.39 (0.19–0.78)                     |
| Tropisetron vs Placebo          | 15                                                        | 0.32 (0.22–0.48)                    | 0.248                             | 0.32 (0.23–0.43)                     | 3                                                       | 0.18 (0.09–0.36)                    | 0.000                             | 0.18 (0.08–0.41)                     |
| Ondansetron+DEX vs Placebo      | 12                                                        | 0.16 (0.09–0.27)                    | 0.150                             | 0.16 (0.12–0.23)                     | 5                                                       | 0.06 (0.03–0.17)                    | 0.000                             | 0.07 (0.03–0.15)                     |
| Palonosetron vs Placebo         | 4                                                         | 0.53 (0.38–0.73)                    | 0.000                             | 0.38 (0.24–0.60)                     | NA                                                      | NA                                  | NA                                | NA                                   |
| Ramosetron vs Placebo           | 5                                                         | 0.42 (0.26–0.68)                    | 0.000                             | 0.28 (0.18–0.43)                     | NA                                                      | NA                                  | NA                                | NA                                   |
| Ondansetron+DROP vs Placebo     | 2                                                         | 0.15 (0.07–0.31)                    | 0.000                             | 0.14 (0.08–0.26)                     | 1                                                       | 0.13 (0.05–0.33)                    | --                                | 0.11 (0.04–0.33)                     |
| Ondansetron+METO vs Placebo     | 2                                                         | 0.16 (0.06–0.43)                    | 0.000                             | 0.15 (0.06–0.42)                     | 2                                                       | 0.16 (0.06–0.43)                    | 0.000                             | 0.18 (0.06–0.53)                     |
| Granisetron+DEX vs Placebo      | 5                                                         | 0.16 (0.08–0.31)                    | 0.000                             | 0.15 (0.09–0.24)                     | 2                                                       | 0.08 (0.03–0.27)                    | 0.000                             | 0.09 (0.02–0.31)                     |
| Palonosetron+DEX vs Placebo     | NA                                                        | NA                                  | NA                                | 1.43 (0.2–10.14)                     | NA                                                      | NA                                  | NA                                | NA                                   |
| Dolasetron+DEX vs Placebo       | 1                                                         | 0.06 (0.01–0.30)                    | --                                | 0.18 (0.06–0.49)                     | NA                                                      | NA                                  | NA                                | NA                                   |
| Dolasetron+DROP vs Placebo      | 1                                                         | 0.16 (0.07–0.35)                    | --                                | 0.19 (0.07–0.52)                     | NA                                                      | NA                                  | NA                                | NA                                   |
| Granisetron+DROP vs Placebo     | 2                                                         | 0.30 (0.05–1.66)                    | 0.864                             | 0.31 (0.11–0.82)                     | NA                                                      | NA                                  | NA                                | NA                                   |
| Granisetron vs Ondansetron      | 12                                                        | 0.52 (0.34–0.81)                    | 0.000                             | 0.73 (0.56–0.94)                     | NA                                                      | NA                                  | NA                                | 0.78 (0.37–1.63)                     |
| Dolasetron vs Ondansetron       | 6                                                         | 1.14 (0.72–1.80)                    | 0.000                             | 1.21 (0.83–1.75)                     | 2                                                       | 1.03 (0.39–2.77)                    | 0.169                             | 1.28 (0.63–2.62)                     |
| Tropisetron vs Ondansetron      | 3                                                         | 0.72 (0.29–1.78)                    | 0.348                             | 0.87 (0.63–1.21)                     | NA                                                      | NA                                  | NA                                | 0.58 (0.24–1.39)                     |
| Ondansetron+DEX vs Ondansetron  | 15                                                        | 0.50 (0.33–0.75)                    | 0.170                             | 0.46 (0.33–0.63)                     | 3                                                       | 0.24 (0.12–0.47)                    | 0.000                             | 0.23 (0.11–0.49)                     |
| Palonosetron vs Ondansetron     | 3                                                         | 0.20 (0.02–2.16)                    | 3.553                             | 1.06 (0.67–1.68)                     | NA                                                      | NA                                  | NA                                | NA                                   |
| Ramosetron vs Ondansetron       | 6                                                         | 0.57 (0.38–0.85)                    | 0.000                             | 0.78 (0.51–1.18)                     | NA                                                      | NA                                  | NA                                | NA                                   |
| Ondansetron+DROP vs Ondansetron | 5                                                         | 0.43 (0.24–0.78)                    | 0.000                             | 0.39 (0.21–0.71)                     | 1                                                       | 0.31 (0.12–0.77)                    | --                                | 0.37 (0.13–1.09)                     |
| Ondansetron+METO vs Ondansetron | 3                                                         | 0.53 (0.18–1.58)                    | 0.030                             | 0.42 (0.15–1.17)                     | 2                                                       | 0.73 (0.23–2.25)                    | 0.000                             | 0.59 (0.19–1.78)                     |
| Granisetron+DEX vs Ondansetron  | NA                                                        | NA                                  | NA                                | 0.41 (0.25–0.67)                     | NA                                                      | NA                                  | NA                                | 0.28 (0.08–1.04)                     |
| Palonosetron+DEX vs Ondansetron | NA                                                        | NA                                  | NA                                | 3.96 (0.56–28.12)                    | NA                                                      | NA                                  | NA                                | NA                                   |
| Dolasetron+DEX vs Ondansetron   | NA                                                        | NA                                  | NA                                | 0.50 (0.18–1.37)                     | NA                                                      | NA                                  | NA                                | NA                                   |
| Dolasetron+DROP vs Ondansetron  | NA                                                        | NA                                  | NA                                | 0.54 (0.20–1.44)                     | NA                                                      | NA                                  | NA                                | NA                                   |
| Granisetron+DROP vs Ondansetron | NA                                                        | NA                                  | NA                                | 0.85 (0.31–2.28)                     | NA                                                      | NA                                  | NA                                | NA                                   |
| Dolasetron vs Granisetron       | NA                                                        | NA                                  | NA                                | 1.66 (1.07–2.57)                     | NA                                                      | NA                                  | NA                                | 1.65 (0.61–4.47)                     |
| Tropisetron vs Granisetron      | NA                                                        | NA                                  | NA                                | 1.20 (0.80–1.79)                     | NA                                                      | NA                                  | NA                                | 0.75 (0.25–2.25)                     |
| Ondansetron+DEX vs Granisetron  | NA                                                        | NA                                  | NA                                | 0.63 (0.42–0.94)                     | NA                                                      | NA                                  | NA                                | 0.30 (0.11–0.83)                     |
| Palonosetron vs Granisetron     | 2                                                         | 0.20 (0.02–2.25)                    | 2.058                             | 1.46 (0.88–2.42)                     | NA                                                      | NA                                  | NA                                | NA                                   |
| Ramosetron vs Granisetron       | 1                                                         | 2.20 (0.51–9.58)                    | --                                | 1.07 (0.66–1.73)                     | NA                                                      | NA                                  | NA                                | NA                                   |

|                                     |    |                  |       |                   |    |                   |    |                  |
|-------------------------------------|----|------------------|-------|-------------------|----|-------------------|----|------------------|
| Ondansetron+DROP vs Granisetron     | NA | NA               | NA    | 0.54 (0.28–1.03)  | NA | NA                | NA | 0.48 (0.13–1.73) |
| Ondansetron+METO vs Granisetron     | NA | NA               | NA    | 0.58 (0.20–1.64)  | NA | NA                | NA | 0.76 (0.21–2.81) |
| Granisetron+DEX vs Granisetron      | 7  | 0.39 (0.2–0.77)  | 0.176 | 0.57 (0.35–0.92)  | 1  | 0.14 (0.02, 1.23) | -- | 0.36 (0.09–1.50) |
| Palonosetron+DEX vs Granisetron     | NA | NA               | NA    | 5.44 (0.76–39.01) | NA | NA                | NA | NA               |
| Dolasetron+DEX vs Granisetron       | NA | NA               | NA    | 0.68 (0.24–1.92)  | NA | NA                | NA | NA               |
| Dolasetron+DROP vs Granisetron      | NA | NA               | NA    | 0.74 (0.27–2.03)  | NA | NA                | NA | NA               |
| Granisetron+DROP vs Granisetron     | 2  | 1.00 (0.32–3.17) | 0.000 | 1.16 (0.43–3.12)  | NA | NA                | NA | NA               |
| Tropisetron vs Dolasetron           | 1  | 0.51 (0.20–1.28) | --    | 0.72 (0.45–1.16)  | NA | NA                | NA | 0.46 (0.15–1.35) |
| Ondansetron+DEX vs Dolasetron       | NA | NA               | NA    | 0.38 (0.23–0.62)  | NA | NA                | NA | 0.18 (0.07–0.50) |
| Palonosetron vs Dolasetron          | NA | NA               | NA    | 0.88 (0.49–1.58)  | NA | NA                | NA | NA               |
| Ramosetron vs Dolasetron            | NA | NA               | NA    | 0.65 (0.37–1.12)  | NA | NA                | NA | NA               |
| Ondansetron+DROP vs Dolasetron      | NA | NA               | NA    | 0.32 (0.16–0.65)  | NA | NA                | NA | 0.29 (0.08–1.04) |
| Ondansetron+METO vs Dolasetron      | NA | NA               | NA    | 0.35 (0.12–1.03)  | NA | NA                | NA | 0.46 (0.13–1.68) |
| Granisetron+DEX vs Dolasetron       | NA | NA               | NA    | 0.34 (0.19–0.63)  | NA | NA                | NA | 0.22 (0.05–0.95) |
| Palonosetron+DEX vs Dolasetron      | NA | NA               | NA    | 3.28 (0.45–24.07) | NA | NA                | NA | NA               |
| Dolasetron+DEX vs Dolasetron        | 2  | 0.30 (0.04–2.43) | 1.795 | 0.41 (0.16–1.08)  | NA | NA                | NA | NA               |
| Dolasetron+DROP vs Dolasetron       | 1  | 0.57 (0.24–1.35) | --    | 0.45 (0.17–1.20)  | NA | NA                | NA | NA               |
| Granisetron+DROP vs Dolasetron      | NA | NA               | NA    | 0.70 (0.25–2.01)  | NA | NA                | NA | NA               |
| Ondansetron+DEX vs Tropisetron      | NA | NA               | NA    | 0.52 (0.33–0.82)  | NA | NA                | NA | 0.40 (0.13–1.22) |
| Palonosetron vs Tropisetron         | NA | NA               | NA    | 1.21 (0.70–2.10)  | NA | NA                | NA | NA               |
| Ramosetron vs Tropisetron           | NA | NA               | NA    | 0.89 (0.53–1.51)  | NA | NA                | NA | NA               |
| Ondansetron+DROP vs Tropisetron     | NA | NA               | NA    | 0.45 (0.23–0.88)  | NA | NA                | NA | 0.64 (0.16–2.48) |
| Ondansetron+METO vs Tropisetron     | NA | NA               | NA    | 0.48 (0.17–1.40)  | NA | NA                | NA | 1.01 (0.25–4.02) |
| Granisetron+DEX vs Tropisetron      | NA | NA               | NA    | 0.47 (0.26–0.84)  | NA | NA                | NA | 0.48 (0.10–2.25) |
| Palonosetron+DEX vs Tropisetron     | NA | NA               | NA    | 4.53 (0.62–32.90) | NA | NA                | NA | NA               |
| Dolasetron+DEX vs Tropisetron       | NA | NA               | NA    | 0.57 (0.20–1.62)  | NA | NA                | NA | NA               |
| Dolasetron+DROP vs Tropisetron      | NA | NA               | NA    | 0.61 (0.22–1.72)  | NA | NA                | NA | NA               |
| Granisetron+DROP vs Tropisetron     | NA | NA               | NA    | 0.97 (0.34–2.72)  | NA | NA                | NA | NA               |
| Palonosetron vs Ondansetron+DEX     | NA | NA               | NA    | 2.32 (1.33–4.07)  | NA | NA                | NA | NA               |
| Ramosetron vs Ondansetron+DEX       | NA | NA               | NA    | 1.71 (1.01–2.90)  | NA | NA                | NA | NA               |
| Ondansetron+DROP vs Ondansetron+DEX | 3  | 0.55 (0.20–1.50) | 0.044 | 0.86 (0.45–1.63)  | NA | NA                | NA | 1.60 (0.44–5.83) |
| Ondansetron+METO vs Ondansetron+DEX | NA | NA               | NA    | 0.93 (0.32–2.68)  | NA | NA                | NA | 2.53 (0.68–9.47) |
| Granisetron+DEX vs Ondansetron+DEX  | 3  | 1.54 (0.72–3.27) | 0.000 | 0.90 (0.53–1.55)  | 1  | 3.27 (0.32–33.78) | -- | 1.22 (0.29–5.15) |
| Palonosetron+DEX vs Ondansetron+DEX | NA | NA               | NA    | 8.68 (1.19–63.20) | NA | NA                | NA | NA               |
| Dolasetron+DEX vs Ondansetron+DEX   | NA | NA               | NA    | 1.08 (0.37–3.14)  | NA | NA                | NA | NA               |
| Dolasetron+DROP vs Ondansetron+DEX  | NA | NA               | NA    | 1.18 (0.42–3.32)  | NA | NA                | NA | NA               |

|                                      |    |                  |       |                    |    |    |    |                  |
|--------------------------------------|----|------------------|-------|--------------------|----|----|----|------------------|
| Granisetron+DROP vs Ondansetron+DEX  | NA | NA               | NA    | 1.85 (0.66–5.21)   | NA | NA | NA | NA               |
| Ramosetron vs Palonosetron           | NA | NA               | NA    | 0.74 (0.40–1.36)   | NA | NA | NA | NA               |
| Ondansetron+DROP vs Palonosetron     | NA | NA               | NA    | 0.37 (0.17–0.78)   | NA | NA | NA | NA               |
| Ondansetron+METO vs Palonosetron     | NA | NA               | NA    | 0.40 (0.13–1.21)   | NA | NA | NA | NA               |
| Granisetron+DEX vs Palonosetron      | NA | NA               | NA    | 0.39 (0.20–0.75)   | NA | NA | NA | NA               |
| Palonosetron+DEX vs Palonosetron     | 2  | 3.75 (0.6–23.42) | 0.000 | 3.73 (0.56–25.08)  | NA | NA | NA | NA               |
| Dolasetron+DEX vs Palonosetron       | NA | NA               | NA    | 0.47 (0.15–1.41)   | NA | NA | NA | NA               |
| Dolasetron+DROP vs Palonosetron      | NA | NA               | NA    | 0.51 (0.17–1.50)   | NA | NA | NA | NA               |
| Granisetron+DROP vs Palonosetron     | NA | NA               | NA    | 0.80 (0.27–2.36)   | NA | NA | NA | NA               |
| Ondansetron+DROP vs Ramosetron       | NA | NA               | NA    | 0.50 (0.24–1.04)   | NA | NA | NA | NA               |
| Ondansetron+METO vs Ramosetron       | NA | NA               | NA    | 0.54 (0.18–1.62)   | NA | NA | NA | NA               |
| Granisetron+DEX vs Ramosetron        | NA | NA               | NA    | 0.53 (0.28–1.00)   | NA | NA | NA | NA               |
| Palonosetron+DEX vs Ramosetron       | NA | NA               | NA    | 5.08 (0.69–37.64)  | NA | NA | NA | NA               |
| Dolasetron+DEX vs Ramosetron         | NA | NA               | NA    | 0.63 (0.21–1.90)   | NA | NA | NA | NA               |
| Dolasetron+DROP vs Ramosetron        | NA | NA               | NA    | 0.69 (0.24–2.00)   | NA | NA | NA | NA               |
| Granisetron+DROP vs Ramosetron       | NA | NA               | NA    | 1.09 (0.37–3.16)   | NA | NA | NA | NA               |
| Ondansetron+METO vs Ondansetron+DROP | NA | NA               | NA    | 1.08 (0.33–3.51)   | NA | NA | NA | 1.58 (0.34–7.29) |
| Granisetron+DEX vs Ondansetron+DROP  | NA | NA               | NA    | 1.06 (0.49–2.27)   | NA | NA | NA | 0.76 (0.14–4.04) |
| Palonosetron+DEX vs Ondansetron+DROP | NA | NA               | NA    | 10.13 (1.31–78.58) | NA | NA | NA | NA               |
| Dolasetron+DEX vs Ondansetron+DROP   | NA | NA               | NA    | 1.27 (0.39–4.11)   | NA | NA | NA | NA               |
| Dolasetron+DROP vs Ondansetron+DROP  | NA | NA               | NA    | 1.37 (0.43–4.34)   | NA | NA | NA | NA               |
| Granisetron+DROP vs Ondansetron+DROP | NA | NA               | NA    | 2.16 (0.68–6.86)   | NA | NA | NA | NA               |
| Granisetron+DEX vs Ondansetron+METO  | NA | NA               | NA    | 0.98 (0.32–3.01)   | NA | NA | NA | 0.48 (0.09–2.61) |
| Palonosetron+DEX vs Ondansetron+METO | NA | NA               | NA    | 9.38 (1.03–85.06)  | NA | NA | NA | NA               |
| Dolasetron+DEX vs Ondansetron+METO   | NA | NA               | NA    | 1.17 (0.28–4.91)   | NA | NA | NA | NA               |
| Dolasetron+DROP vs Ondansetron+METO  | NA | NA               | NA    | 1.27 (0.31–5.22)   | NA | NA | NA | NA               |
| Granisetron+DROP vs Ondansetron+METO | NA | NA               | NA    | 2.00 (0.49–8.24)   | NA | NA | NA | NA               |
| Palonosetron+DEX vs Granisetron+DEX  | NA | NA               | NA    | 9.6 (1.28–72.03)   | NA | NA | NA | NA               |
| Dolasetron+DEX vs Granisetron+DEX    | NA | NA               | NA    | 1.20 (0.39–3.68)   | NA | NA | NA | NA               |
| Dolasetron+DROP vs Granisetron+DEX   | NA | NA               | NA    | 1.30 (0.44–3.90)   | NA | NA | NA | NA               |
| Granisetron+DROP vs Granisetron+DEX  | 2  | 2.38 (0.61–9.23) | 0.000 | 2.05 (0.72–5.87)   | NA | NA | NA | NA               |
| Dolasetron+DEX vs Palonosetron+DEX   | NA | NA               | NA    | 0.12 (0.01–1.13)   | NA | NA | NA | NA               |
| Dolasetron+DROP vs Palonosetron+DEX  | NA | NA               | NA    | 0.14 (0.02–1.21)   | NA | NA | NA | NA               |
| Granisetron+DROP vs Palonosetron+DEX | NA | NA               | NA    | 0.21 (0.02–1.91)   | NA | NA | NA | NA               |
| Dolasetron+DROP vs Dolasetron+DEX    | NA | NA               | NA    | 1.09 (0.27–4.29)   | NA | NA | NA | NA               |

|                                                                                                                    |                                                         |                   |         |                  |                                                       |                    |       |                   |
|--------------------------------------------------------------------------------------------------------------------|---------------------------------------------------------|-------------------|---------|------------------|-------------------------------------------------------|--------------------|-------|-------------------|
| Granisetron+DROP vs Dolasetron+DEX                                                                                 | NA                                                      | NA                | NA      | 1.71 (0.42–7.02) | NA                                                    | NA                 | NA    | NA                |
| Granisetron+DROP vs Dolasetron+DROP                                                                                | NA                                                      | NA                | NA      | 1.57 (0.39–6.33) | NA                                                    | NA                 | NA    | NA                |
| <b>Between-study heterogeneity</b>                                                                                 | <b>0.129</b>                                            |                   |         |                  | <b>0.154</b>                                          |                    |       |                   |
| <b>Design-by-treatment interaction model for inconsistency (<math>\chi^2</math>, d.f., P-value, heterogeneity)</b> | <b>50.77 (44, 0.224, 0.124)</b>                         |                   |         |                  | <b>2.98 (10, 0.982, 0.229)</b>                        |                    |       |                   |
|                                                                                                                    | <b>Nausea (all ages) - 195 RCTs and 24,230 patients</b> |                   |         |                  | <b>Nausea (children) - 11 RCTs and 1,326 patients</b> |                    |       |                   |
| Ondansetron vs Placebo                                                                                             | 121                                                     | 0.46 (0.41–0.52)  | 0.294   | 0.46 (0.41–0.52) | 10                                                    | 0.44 (0.29–0.68)   | 0.143 | 0.45 (0.30–0.66)  |
| Granisetron vs Placebo                                                                                             | 21                                                      | 0.35 (0.23–0.52)  | 0.393   | 0.35 (0.26–0.47) | NA                                                    | NA                 | NA    | NA                |
| Dolasetron vs Placebo                                                                                              | 9                                                       | 0.59 (0.48–0.73)  | 0.000   | 0.60 (0.43–0.86) | 1                                                     | 0.29 (0.11–0.73)   | --    | 0.26 (0.09–0.74)  |
| Tropisetron vs Placebo                                                                                             | 15                                                      | 0.51 (0.40–0.66)  | 0.056   | 0.48 (0.35–0.65) | NA                                                    | NA                 | NA    | NA                |
| Ondansetron+DEX vs Placebo                                                                                         | 8                                                       | 0.21 (0.14–0.34)  | <0.0001 | 0.28 (0.19–0.41) | 2                                                     | 0.21 (0.08–0.57)   | 0.00  | 0.22 (0.08–0.61)  |
| Palonosetron vs Placebo                                                                                            | 3                                                       | 0.48 (0.33–0.68)  | 0.000   | 0.30 (0.17–0.53) | NA                                                    | NA                 | NA    | NA                |
| Ramosetron vs Placebo                                                                                              | 5                                                       | 0.35 (0.18–0.68)  | 0.393   | 0.32 (0.22–0.47) | NA                                                    | NA                 | NA    | NA                |
| Ondansetron+DROP vs Placebo                                                                                        | 2                                                       | 0.31 (0.06–1.55)  | 0.730   | 0.26 (0.14–0.49) | 1                                                     | 0.07 (0.00–1.26)   | --    | 0.07 (0.00–1.38)  |
| Ondansetron+METO vs Placebo                                                                                        | 1                                                       | 1.00 (0.13–7.72)  | --      | 0.30 (0.07–1.37) | 1                                                     | 1.00 (0.13–7.72)   | --    | 1.18 (0.19–7.52)  |
| Granisetron+DEX vs Placebo                                                                                         | 4                                                       | 0.21 (0.11–0.39)  | 0.000   | 0.20 (0.12–0.34) | 1                                                     | 0.09 (0.02–0.49)   | --    | 0.10 (0.02–0.53)  |
| Palonosetron+DEX vs Placebo                                                                                        | NA                                                      | NA                | NA      | 0.37 (0.12–1.10) | NA                                                    | NA                 | NA    | NA                |
| Dolasetron+DEX vs Placebo                                                                                          | 1                                                       | 0.28 (0.05–1.53)  | --      | 0.21 (0.07–0.61) | NA                                                    | NA                 | NA    | NA                |
| Dolasetron+DROP vs Placebo                                                                                         | 1                                                       | 0.17 (0.08–0.36)  | --      | 0.19 (0.07–0.54) | NA                                                    | NA                 | NA    | NA                |
| Granisetron+DROP vs Placebo                                                                                        | 2                                                       | 0.22 (0.08–0.61)  | 0.000   | 0.21 (0.07–0.62) | NA                                                    | NA                 | NA    | NA                |
| Granisetron vs Ondansetron                                                                                         | 10                                                      | 0.67 (0.46–0.99)  | 0.000   | 0.76 (0.56–1.03) | NA                                                    | NA                 | NA    | NA                |
| Dolasetron vs Ondansetron                                                                                          | 5                                                       | 1.27 (0.89–1.80)  | <0.0001 | 1.31 (0.92–1.87) | 1                                                     | 0.54 (0.20–1.45)   | --    | 0.59 (0.21–1.67)  |
| Tropisetron vs Ondansetron                                                                                         | 5                                                       | 1.00 (0.75–1.33)  | <0.0001 | 1.04 (0.75–1.42) | NA                                                    | NA                 | NA    | NA                |
| Ondansetron+DEX vs Ondansetron                                                                                     | 14                                                      | 0.68 (0.48–0.96)  | 0.000   | 0.61 (0.42–0.89) | 1                                                     | 0.53 (0.11–2.60)   | --    | 0.48 (0.16–1.43)  |
| Palonosetron vs Ondansetron                                                                                        | 3                                                       | 0.29 (0.13–0.65)  | 0.000   | 0.66 (0.37–1.16) | NA                                                    | NA                 | NA    | NA                |
| Ramosetron vs Ondansetron                                                                                          | 7                                                       | 0.64 (0.39–1.03)  | 0.223   | 0.69 (0.47–1.01) | NA                                                    | NA                 | NA    | NA                |
| Ondansetron+DROP vs Ondansetron                                                                                    | 6                                                       | 0.63 (0.38–1.05)  | 0.000   | 0.57 (0.31–1.06) | 1                                                     | 0.19 (0.01–4.12)   | --    | 0.17 (0.01–3.12)  |
| Ondansetron+METO vs Ondansetron                                                                                    | 2                                                       | 0.59 (0.01–33.22) | 6.615   | 0.66 (0.15–2.95) | 1                                                     | 5.43 (0.25–119.05) | --    | 2.65 (0.41–17.28) |
| Granisetron+DEX vs Ondansetron                                                                                     | NA                                                      | NA                | NA      | 0.43 (0.25–0.73) | NA                                                    | NA                 | NA    | 0.21 (0.04–1.23)  |
| Palonosetron+DEX vs Ondansetron                                                                                    | NA                                                      | NA                | NA      | 0.79 (0.26–2.38) | NA                                                    | NA                 | NA    | NA                |
| Dolasetron+DEX vs Ondansetron                                                                                      | NA                                                      | NA                | NA      | 0.46 (0.16–1.33) | NA                                                    | NA                 | NA    | NA                |
| Dolasetron+DROP vs Ondansetron                                                                                     | NA                                                      | NA                | NA      | 0.41 (0.15–1.17) | NA                                                    | NA                 | NA    | NA                |
| Granisetron+DROP vs Ondansetron                                                                                    | NA                                                      | NA                | NA      | 0.45 (0.15–1.35) | NA                                                    | NA                 | NA    | NA                |
| Dolasetron vs Granisetron                                                                                          | NA                                                      | NA                | NA      | 1.73 (1.10–2.72) | NA                                                    | NA                 | NA    | NA                |
| Tropisetron vs Granisetron                                                                                         | 1                                                       | 3.00 (0.30–29.85) | --      | 1.37 (0.90–2.08) | NA                                                    | NA                 | NA    | NA                |
| Ondansetron+DEX vs Granisetron                                                                                     | NA                                                      | NA                | NA      | 0.81 (0.50–1.29) | NA                                                    | NA                 | NA    | NA                |

|                                     |    |                  |         |                  |    |                  |    |                   |
|-------------------------------------|----|------------------|---------|------------------|----|------------------|----|-------------------|
| Palonosetron vs Granisetron         | 2  | 0.33 (0.07–1.54) | 0.000   | 0.87 (0.47–1.62) | NA | NA               | NA | NA                |
| Ramosetron vs Granisetron           | 1  | 1.75 (0.61–4.99) | --      | 0.91 (0.57–1.46) | NA | NA               | NA | NA                |
| Ondansetron+DROP vs Granisetron     | NA | NA               | NA      | 0.76 (0.38–1.50) | NA | NA               | NA | NA                |
| Ondansetron+METO vs Granisetron     | NA | NA               | NA      | 0.87 (0.19–4.01) | NA | NA               | NA | NA                |
| Granisetron+DEX vs Granisetron      | 6  | 0.59 (0.39–0.88) | <0.0001 | 0.56 (0.33–0.95) | NA | NA               | NA | NA                |
| Palonosetron+DEX vs Granisetron     | NA | NA               | NA      | 1.04 (0.34–3.23) | NA | NA               | NA | NA                |
| Dolasetron+DEX vs Granisetron       | NA | NA               | NA      | 0.60 (0.20–1.82) | NA | NA               | NA | NA                |
| Dolasetron+DROP vs Granisetron      | NA | NA               | NA      | 0.55 (0.19–1.61) | NA | NA               | NA | NA                |
| Granisetron+DROP vs Granisetron     | 2  | 0.84 (0.26–2.68) | 0.000   | 0.60 (0.20–1.79) | NA | NA               | NA | NA                |
| Tropisetron vs Dolasetron           | 1  | 0.83 (0.31–2.22) | --      | 0.79 (0.50–1.24) | NA | NA               | NA | NA                |
| Ondansetron+DEX vs Dolasetron       | NA | NA               | NA      | 0.47 (0.28–0.78) | NA | NA               | NA | 0.81 (0.19–3.50)  |
| Palonosetron vs Dolasetron          | NA | NA               | NA      | 0.50 (0.26–0.97) | NA | NA               | NA | NA                |
| Ramosetron vs Dolasetron            | NA | NA               | NA      | 0.53 (0.31–0.88) | NA | NA               | NA | NA                |
| Ondansetron+DROP vs Dolasetron      | NA | NA               | NA      | 0.44 (0.21–0.89) | NA | NA               | NA | 0.28 (0.01–6.17)  |
| Ondansetron+METO vs Dolasetron      | NA | NA               | NA      | 0.50 (0.11–2.35) | NA | NA               | NA | 4.47 (0.54–36.96) |
| Granisetron+DEX vs Dolasetron       | NA | NA               | NA      | 0.33 (0.17–0.62) | NA | NA               | NA | 0.36 (0.05–2.66)  |
| Palonosetron+DEX vs Dolasetron      | NA | NA               | NA      | 0.60 (0.19–1.91) | NA | NA               | NA | NA                |
| Dolasetron+DEX vs Dolasetron        | 2  | 0.33 (0.15–0.72) | 0.000   | 0.35 (0.13–0.97) | NA | NA               | NA | NA                |
| Dolasetron+DROP vs Dolasetron       | 1  | 0.35 (0.17–0.73) | --      | 0.32 (0.11–0.89) | NA | NA               | NA | NA                |
| Granisetron+DROP vs Dolasetron      | NA | NA               | NA      | 0.35 (0.11–1.08) | NA | NA               | NA | NA                |
| Ondansetron+DEX vs Tropisetron      | NA | NA               | NA      | 0.59 (0.36–0.95) | NA | NA               | NA | NA                |
| Palonosetron vs Tropisetron         | NA | NA               | NA      | 0.63 (0.34–1.20) | NA | NA               | NA | NA                |
| Ramosetron vs Tropisetron           | NA | NA               | NA      | 0.66 (0.41–1.08) | NA | NA               | NA | NA                |
| Ondansetron+DROP vs Tropisetron     | NA | NA               | NA      | 0.55 (0.28–1.10) | NA | NA               | NA | NA                |
| Ondansetron+METO vs Tropisetron     | NA | NA               | NA      | 0.64 (0.14–2.94) | NA | NA               | NA | NA                |
| Granisetron+DEX vs Tropisetron      | NA | NA               | NA      | 0.41 (0.22–0.76) | NA | NA               | NA | NA                |
| Palonosetron+DEX vs Tropisetron     | NA | NA               | NA      | 0.76 (0.24–2.38) | NA | NA               | NA | NA                |
| Dolasetron+DEX vs Tropisetron       | NA | NA               | NA      | 0.44 (0.15–1.33) | NA | NA               | NA | NA                |
| Dolasetron+DROP vs Tropisetron      | NA | NA               | NA      | 0.40 (0.14–1.17) | NA | NA               | NA | NA                |
| Granisetron+DROP vs Tropisetron     | NA | NA               | NA      | 0.44 (0.14–1.35) | NA | NA               | NA | NA                |
| Palonosetron vs Ondansetron+DEX     | NA | NA               | NA      | 1.08 (0.55–2.12) | NA | NA               | NA | NA                |
| Ramosetron vs Ondansetron+DEX       | NA | NA               | NA      | 1.13 (0.66–1.92) | NA | NA               | NA | NA                |
| Ondansetron+DROP vs Ondansetron+DEX | 2  | 0.45 (0.19–1.09) | 0.000   | 0.94 (0.47–1.86) | NA | NA               | NA | 0.35 (0.02–7.67)  |
| Ondansetron+METO vs Ondansetron+DEX | NA | NA               | NA      | 1.08 (0.23–5.06) | NA | NA               | NA | 5.50 (0.66–45.96) |
| Granisetron+DEX vs Ondansetron+DEX  | 2  | 0.60 (0.19–1.94) | 0.000   | 0.70 (0.37–1.31) | 1  | 0.46 (0.08–2.75) | -- | 0.44 (0.07–2.66)  |
| Palonosetron+DEX vs Ondansetron+DEX | NA | NA               | NA      | 1.30 (0.41–4.13) | NA | NA               | NA | NA                |
| Dolasetron+DEX vs Ondansetron+DEX   | NA | NA               | NA      | 0.75 (0.24–2.32) | NA | NA               | NA | NA                |

|                                      |    |                  |       |                  |    |    |    |                     |
|--------------------------------------|----|------------------|-------|------------------|----|----|----|---------------------|
| Dolasetron+DROP vs Ondansetron+DEX   | NA | NA               | NA    | 0.68 (0.22–2.05) | NA | NA | NA | NA                  |
| Granisetron+DROP vs Ondansetron+DEX  | NA | NA               | NA    | 0.74 (0.24–2.34) | NA | NA | NA | NA                  |
| Ramosetron vs Palonosetron           | NA | NA               | NA    | 1.05 (0.53–2.06) | NA | NA | NA | NA                  |
| Ondansetron+DROP vs Palonosetron     | NA | NA               | NA    | 0.87 (0.38–2.01) | NA | NA | NA | NA                  |
| Ondansetron+METO vs Palonosetron     | NA | NA               | NA    | 1.00 (0.20–4.97) | NA | NA | NA | NA                  |
| Granisetron+DEX vs Palonosetron      | NA | NA               | NA    | 0.65 (0.30–1.40) | NA | NA | NA | NA                  |
| Palonosetron+DEX vs Palonosetron     | 2  | 1.16 (0.61–2.19) | 0.000 | 1.20 (0.47–3.09) | NA | NA | NA | NA                  |
| Dolasetron+DEX vs Palonosetron       | NA | NA               | NA    | 0.70 (0.21–2.31) | NA | NA | NA | NA                  |
| Dolasetron+DROP vs Palonosetron      | NA | NA               | NA    | 0.63 (0.19–2.05) | NA | NA | NA | NA                  |
| Granisetron+DROP vs Palonosetron     | NA | NA               | NA    | 0.69 (0.20–2.33) | NA | NA | NA | NA                  |
| Ondansetron+DROP vs Ramosetron       | NA | NA               | NA    | 0.83 (0.40–1.72) | NA | NA | NA | NA                  |
| Ondansetron+METO vs Ramosetron       | NA | NA               | NA    | 0.96 (0.20–4.50) | NA | NA | NA | NA                  |
| Granisetron+DEX vs Ramosetron        | NA | NA               | NA    | 0.62 (0.32–1.19) | NA | NA | NA | NA                  |
| Palonosetron+DEX vs Ramosetron       | NA | NA               | NA    | 1.15 (0.36–3.67) | NA | NA | NA | NA                  |
| Dolasetron+DEX vs Ramosetron         | NA | NA               | NA    | 0.67 (0.21–2.06) | NA | NA | NA | NA                  |
| Dolasetron+DROP vs Ramosetron        | NA | NA               | NA    | 0.60 (0.20–1.82) | NA | NA | NA | NA                  |
| Granisetron+DROP vs Ramosetron       | NA | NA               | NA    | 0.66 (0.21–2.08) | NA | NA | NA | NA                  |
| Ondansetron+METO vs Ondansetron+DROP | NA | NA               | NA    | 1.15 (0.23–5.84) | NA | NA | NA | 15.91 (0.50–503.02) |
| Granisetron+DEX vs Ondansetron+DROP  | NA | NA               | NA    | 0.75 (0.33–1.69) | NA | NA | NA | 1.29 (0.04–37.91)   |
| Palonosetron+DEX vs Ondansetron+DROP | NA | NA               | NA    | 1.38 (0.39–4.88) | NA | NA | NA | NA                  |
| Dolasetron+DEX vs Ondansetron+DROP   | NA | NA               | NA    | 0.80 (0.23–2.74) | NA | NA | NA | NA                  |
| Dolasetron+DROP vs Ondansetron+DROP  | NA | NA               | NA    | 0.72 (0.22–2.43) | NA | NA | NA | NA                  |
| Granisetron+DROP vs Ondansetron+DROP | NA | NA               | NA    | 0.80 (0.23–2.77) | NA | NA | NA | NA                  |
| Granisetron+DEX vs Ondansetron+METO  | NA | NA               | NA    | 0.65 (0.13–3.18) | NA | NA | NA | 0.08 (0.01–1.00)    |
| Palonosetron+DEX vs Ondansetron+METO | NA | NA               | NA    | 1.20 (0.19–7.69) | NA | NA | NA | NA                  |
| Dolasetron+DEX vs Ondansetron+METO   | NA | NA               | NA    | 0.69 (0.11–4.36) | NA | NA | NA | NA                  |
| Dolasetron+DROP vs Ondansetron+METO  | NA | NA               | NA    | 0.63 (0.10–3.89) | NA | NA | NA | NA                  |
| Granisetron+DROP vs Ondansetron+METO | NA | NA               | NA    | 0.69 (0.11–4.39) | NA | NA | NA | NA                  |
| Palonosetron+DEX vs Granisetron+DEX  | NA | NA               | NA    | 1.86 (0.55–6.27) | NA | NA | NA | NA                  |
| Dolasetron+DEX vs Granisetron+DEX    | NA | NA               | NA    | 1.07 (0.33–3.53) | NA | NA | NA | NA                  |
| Dolasetron+DROP vs Granisetron+DEX   | NA | NA               | NA    | 0.97 (0.30–3.12) | NA | NA | NA | NA                  |
| Granisetron+DROP vs Granisetron+DEX  | 2  | 0.72 (0.23–2.25) | 0.000 | 1.07 (0.35–3.30) | NA | NA | NA | NA                  |
| Dolasetron+DEX vs Palonosetron+DEX   | NA | NA               | NA    | 0.58 (0.13–2.67) | NA | NA | NA | NA                  |
| Dolasetron+DROP vs Palonosetron+DEX  | NA | NA               | NA    | 0.52 (0.12–2.37) | NA | NA | NA | NA                  |
| Granisetron+DROP vs Palonosetron+DEX | NA | NA               | NA    | 0.58 (0.12–2.68) | NA | NA | NA | NA                  |
| Dolasetron+DROP vs Dolasetron+DEX    | NA | NA               | NA    | 0.90 (0.21–3.86) | NA | NA | NA | NA                  |
| Granisetron+DROP vs Dolasetron+DEX   | NA | NA               | NA    | 0.99 (0.22–4.53) | NA | NA | NA | NA                  |

| Granisetron+DROP vs Dolasetron+DROP                                                                                | NA                                                    | NA               | NA       | 1.10 (0.25–4.94) | NA                                                       | NA               | NA    | NA               |
|--------------------------------------------------------------------------------------------------------------------|-------------------------------------------------------|------------------|----------|------------------|----------------------------------------------------------|------------------|-------|------------------|
| <b>Between-study heterogeneity</b>                                                                                 | <b>0.213</b>                                          |                  |          |                  | <b>0.097</b>                                             |                  |       |                  |
| <b>Design-by-treatment interaction model for inconsistency (<math>\chi^2</math>, d.f., P-value, heterogeneity)</b> | <b>23.47 (41, 0.988, 0.264)</b>                       |                  |          |                  | <b>0.42 (5, 0.995, 0.846)</b>                            |                  |       |                  |
|                                                                                                                    | <b>PONV (all ages) - 125 RCTs and 16,667 patients</b> |                  |          |                  | <b>PONV (children only) - 14 RCTs and 2,394 patients</b> |                  |       |                  |
| Ondansetron vs Placebo                                                                                             | 89                                                    | 0.30 (0.26–0.35) | 0.212    | 0.31 (0.27–0.36) | 11                                                       | 0.33 (0.18–0.60) | 0.804 | 0.34 (0.19–0.62) |
| Granisetron vs Placebo                                                                                             | 16                                                    | 0.23 (0.14–0.37) | 0.521    | 0.23 (0.16–0.32) | 2                                                        | 0.54 (0.26–1.12) | 0.088 | 0.32 (0.08–1.23) |
| Dolasetron vs Placebo                                                                                              | 5                                                     | 0.27 (0.14–0.52) | 0.323    | 0.25 (0.14–0.43) | NA                                                       | NA               | NA    | NA               |
| Tropisetron vs Placebo                                                                                             | 8                                                     | 0.39 (0.28–0.53) | < 0.0001 | 0.36 (0.24–0.54) | NA                                                       | NA               | NA    | NA               |
| Ondansetron+DEX vs Placebo                                                                                         | 8                                                     | 0.12 (0.07–0.20) | 0.124    | 0.15 (0.10–0.22) | 1                                                        | 0.20 (0.06–0.66) | --    | 0.27 (0.04–1.61) |
| Palonosetron vs Placebo                                                                                            | NA                                                    | NA               | NA       | 0.11 (0.03–0.40) | NA                                                       | NA               | NA    | NA               |
| Ramosetron vs Placebo                                                                                              | 4                                                     | 0.30 (0.15–0.59) | 0.325    | 0.26 (0.16–0.41) | NA                                                       | NA               | NA    | NA               |
| Ondansetron+DROP vs Placebo                                                                                        | 2                                                     | 0.13 (0.05–0.34) | 0.000    | 0.11 (0.05–0.24) | 1                                                        | 0.12 (0.04–0.34) | --    | 0.12 (0.02–0.71) |
| Granisetron+DEX vs Placebo                                                                                         | 4                                                     | 0.06 (0.02–0.17) | 0.756    | 0.09 (0.05–0.16) | NA                                                       | NA               | NA    | NA               |
| Palonosetron+DEX vs Placebo                                                                                        | NA                                                    | NA               | NA       | 0.12 (0.02–0.64) | NA                                                       | NA               | NA    | NA               |
| Dolasetron+DROP vs Placebo                                                                                         | 1                                                     | 0.17 (0.08–0.36) | --       | 0.12 (0.04–0.35) | NA                                                       | NA               | NA    | NA               |
| Granisetron+DROP vs Placebo                                                                                        | 2                                                     | 0.17 (0.07–0.38) | 0.000    | 0.16 (0.06–0.40) | NA                                                       | NA               | NA    | NA               |
| Granisetron vs Ondansetron                                                                                         | 9                                                     | 0.75 (0.48–1.18) | 0.047    | 0.73 (0.52–1.03) | 1                                                        | 0.31 (0.03–3.16) | --    | 0.92 (0.22–3.88) |
| Dolasetron vs Ondansetron                                                                                          | 3                                                     | 0.61 (0.34–1.10) | 0.000    | 0.79 (0.45–1.39) | NA                                                       | NA               | NA    | NA               |
| Tropisetron vs Ondansetron                                                                                         | 3                                                     | 0.90 (0.30–2.69) | 0.452    | 1.14 (0.74–1.75) | NA                                                       | NA               | NA    | NA               |
| Ondansetron+DEX vs Ondansetron                                                                                     | 11                                                    | 0.48 (0.33–0.72) | 0.104    | 0.46 (0.31–0.69) | 1                                                        | 1.00 (0.36–2.75) | --    | 0.78 (0.13–4.65) |
| Palonosetron vs Ondansetron                                                                                        | 1                                                     | 0.37 (0.16–0.86) | --       | 0.37 (0.11–1.26) | NA                                                       | NA               | NA    | NA               |
| Ramosetron vs Ondansetron                                                                                          | 4                                                     | 0.74 (0.48–1.13) | 0.022    | 0.82 (0.51–1.30) | 1                                                        | 0.35 (0.13–0.95) | --    | 0.35 (0.06–2.07) |
| Ondansetron+DROP vs Ondansetron                                                                                    | 3                                                     | 0.39 (0.20–0.75) | 0.000    | 0.35 (0.16–0.77) | NA                                                       | NA               | NA    | NA               |
| Granisetron+DEX vs Ondansetron                                                                                     | 1                                                     | 0.22 (0.04–1.21) | --       | 0.30 (0.17–0.53) | NA                                                       | NA               | NA    | NA               |
| Palonosetron+DEX vs Ondansetron                                                                                    | NA                                                    | NA               | NA       | 0.39 (0.07–2.01) | NA                                                       | NA               | NA    | NA               |
| Dolasetron+DROP vs Ondansetron                                                                                     | NA                                                    | NA               | NA       | 0.39 (0.14–1.14) | NA                                                       | NA               | NA    | NA               |
| Granisetron+DROP vs Ondansetron                                                                                    | NA                                                    | NA               | NA       | 0.51 (0.20–1.28) | NA                                                       | NA               | NA    | NA               |
| Dolasetron vs Granisetron                                                                                          | NA                                                    | NA               | NA       | 1.09 (0.57–2.08) | NA                                                       | NA               | NA    | NA               |
| Tropisetron vs Granisetron                                                                                         | 1                                                     | 1.17 (0.39–3.56) | --       | 1.56 (0.93–2.63) | NA                                                       | NA               | NA    | NA               |
| Ondansetron+DEX vs Granisetron                                                                                     | 1                                                     | 0.72 (0.14–3.59) | --       | 0.64 (0.38–1.06) | NA                                                       | NA               | NA    | NA               |
| Palonosetron vs Granisetron                                                                                        | NA                                                    | NA               | NA       | 0.50 (0.14–1.82) | NA                                                       | NA               | NA    | 0.85 (0.09–7.93) |
| Ramosetron vs Granisetron                                                                                          | 1                                                     | 2.27 (0.87–5.96) | --       | 1.12 (0.64–1.95) | NA                                                       | NA               | NA    | 0.39 (0.04–3.53) |
| Ondansetron+DROP vs Granisetron                                                                                    | NA                                                    | NA               | NA       | 0.48 (0.20–1.13) | NA                                                       | NA               | NA    | NA               |
| Granisetron+DEX vs Granisetron                                                                                     | 8                                                     | 0.48 (0.29–0.77) | 0.094    | 0.41 (0.24–0.69) | NA                                                       | NA               | NA    | NA               |
| Palonosetron+DEX vs Granisetron                                                                                    | NA                                                    | NA               | NA       | 0.53 (0.10–2.87) | NA                                                       | NA               | NA    | NA               |
| Dolasetron+DROP vs Granisetron                                                                                     | NA                                                    | NA               | NA       | 0.54 (0.18–1.63) | NA                                                       | NA               | NA    | NA               |
| Granisetron+DROP vs Granisetron                                                                                    | 2                                                     | 0.91 (0.38–2.17) | 0.000    | 0.70 (0.28–1.74) | NA                                                       | NA               | NA    | NA               |

|                                      |    |                  |       |                  |    |    |    |                  |
|--------------------------------------|----|------------------|-------|------------------|----|----|----|------------------|
| Tropisetron vs Dolasetron            | NA | NA               | NA    | 1.43 (0.72–2.85) | NA | NA | NA | NA               |
| Ondansetron+DEX vs Dolasetron        | NA | NA               | NA    | 0.58 (0.30–1.15) | NA | NA | NA | NA               |
| Palonosetron vs Dolasetron           | NA | NA               | NA    | 0.46 (0.12–1.79) | NA | NA | NA | NA               |
| Ramosetron vs Dolasetron             | NA | NA               | NA    | 1.03 (0.50–2.11) | NA | NA | NA | NA               |
| Ondansetron+DROP vs Dolasetron       | NA | NA               | NA    | 0.44 (0.17–1.16) | NA | NA | NA | NA               |
| Granisetron+DEX vs Dolasetron        | NA | NA               | NA    | 0.37 (0.17–0.82) | NA | NA | NA | NA               |
| Palonosetron+DEX vs Dolasetron       | NA | NA               | NA    | 0.48 (0.08–2.78) | NA | NA | NA | NA               |
| Dolasetron+DROP vs Dolasetron        | 1  | 0.35 (0.17–0.73) | --    | 0.49 (0.17–1.42) | NA | NA | NA | NA               |
| Granisetron+DROP vs Dolasetron       | NA | NA               | NA    | 0.64 (0.22–1.86) | NA | NA | NA | NA               |
| Ondansetron+DEX vs Tropisetron       | NA | NA               | NA    | 0.41 (0.23–0.73) | NA | NA | NA | NA               |
| Palonosetron vs Tropisetron          | NA | NA               | NA    | 0.32 (0.09–1.19) | NA | NA | NA | NA               |
| Ramosetron vs Tropisetron            | NA | NA               | NA    | 0.72 (0.39–1.33) | NA | NA | NA | NA               |
| Ondansetron+DROP vs Tropisetron      | NA | NA               | NA    | 0.31 (0.13–0.75) | NA | NA | NA | NA               |
| Granisetron+DEX vs Tropisetron       | NA | NA               | NA    | 0.26 (0.13–0.52) | NA | NA | NA | NA               |
| Palonosetron+DEX vs Tropisetron      | NA | NA               | NA    | 0.34 (0.06–1.87) | NA | NA | NA | NA               |
| Dolasetron+DROP vs Tropisetron       | NA | NA               | NA    | 0.34 (0.11–1.07) | NA | NA | NA | NA               |
| Granisetron+DROP vs Tropisetron      | NA | NA               | NA    | 0.44 (0.16–1.22) | NA | NA | NA | NA               |
| Palonosetron vs Ondansetron+DEX      | NA | NA               | NA    | 0.79 (0.21–2.90) | NA | NA | NA | NA               |
| Ramosetron vs Ondansetron+DEX        | NA | NA               | NA    | 1.76 (0.96–3.23) | NA | NA | NA | NA               |
| Ondansetron+DROP vs Ondansetron+DEX  | 1  | 0.52 (0.21–1.29) | --    | 0.75 (0.33–1.75) | NA | NA | NA | 0.45 (0.04–5.38) |
| Granisetron+DEX vs Ondansetron+DEX   | 1  | 0.64 (0.10–4.19) | --    | 0.64 (0.32–1.27) | NA | NA | NA | NA               |
| Palonosetron+DEX vs Ondansetron+DEX  | NA | NA               | NA    | 0.83 (0.15–4.55) | NA | NA | NA | NA               |
| Dolasetron+DROP vs Ondansetron+DEX   | NA | NA               | NA    | 0.85 (0.27–2.62) | NA | NA | NA | NA               |
| Granisetron+DROP vs Ondansetron+DEX  | NA | NA               | NA    | 1.09 (0.40–2.97) | NA | NA | NA | NA               |
| Ramosetron vs Palonosetron           | NA | NA               | NA    | 2.23 (0.59–8.40) | NA | NA | NA | NA               |
| Ondansetron+DROP vs Palonosetron     | NA | NA               | NA    | 0.96 (0.22–4.17) | NA | NA | NA | NA               |
| Granisetron+DEX vs Palonosetron      | NA | NA               | NA    | 0.81 (0.21–3.19) | NA | NA | NA | NA               |
| Palonosetron+DEX vs Palonosetron     | 2  | 0.99 (0.48–2.01) | 0.000 | 1.05 (0.35–3.14) | NA | NA | NA | NA               |
| Dolasetron+DROP vs Palonosetron      | NA | NA               | NA    | 1.07 (0.21–5.50) | NA | NA | NA | NA               |
| Granisetron+DROP vs Palonosetron     | NA | NA               | NA    | 1.38 (0.29–6.52) | NA | NA | NA | NA               |
| Ondansetron+DROP vs Ramosetron       | NA | NA               | NA    | 0.43 (0.17–1.07) | NA | NA | NA | NA               |
| Granisetron+DEX vs Ramosetron        | NA | NA               | NA    | 0.36 (0.18–0.75) | NA | NA | NA | NA               |
| Palonosetron+DEX vs Ramosetron       | NA | NA               | NA    | 0.47 (0.08–2.63) | NA | NA | NA | NA               |
| Dolasetron+DROP vs Ramosetron        | NA | NA               | NA    | 0.48 (0.15–1.53) | NA | NA | NA | NA               |
| Granisetron+DROP vs Ramosetron       | NA | NA               | NA    | 0.62 (0.22–1.73) | NA | NA | NA | NA               |
| Granisetron+DEX vs Ondansetron+DROP  | NA | NA               | NA    | 0.85 (0.32–2.24) | NA | NA | NA | NA               |
| Palonosetron+DEX vs Ondansetron+DROP | NA | NA               | NA    | 1.10 (0.18–6.87) | NA | NA | NA | NA               |
| Dolasetron+DROP vs Ondansetron+DROP  | NA | NA               | NA    | 1.12 (0.30–4.20) | NA | NA | NA | NA               |



|                                                                                                                                                                                                                                                                                                                                                                                                                                                                                                  |                                 |                  |       |                  |                               |    |    |    |
|--------------------------------------------------------------------------------------------------------------------------------------------------------------------------------------------------------------------------------------------------------------------------------------------------------------------------------------------------------------------------------------------------------------------------------------------------------------------------------------------------|---------------------------------|------------------|-------|------------------|-------------------------------|----|----|----|
| Granisetron+DROP vs Ondansetron+DROP                                                                                                                                                                                                                                                                                                                                                                                                                                                             | NA                              | NA               | NA    | 1.44 (0.43–4.86) | NA                            | NA | NA | NA |
| Palonosetron+DEX vs Granisetron+DEX                                                                                                                                                                                                                                                                                                                                                                                                                                                              | NA                              | NA               | NA    | 1.30 (0.23–7.48) | NA                            | NA | NA | NA |
| Dolasetron+DROP vs Granisetron+DEX                                                                                                                                                                                                                                                                                                                                                                                                                                                               | NA                              | NA               | NA    | 1.32 (0.40–4.38) | NA                            | NA | NA | NA |
| Granisetron+DROP vs Granisetron+DEX                                                                                                                                                                                                                                                                                                                                                                                                                                                              | 2                               | 1.23 (0.50–3.07) | 0.000 | 1.70 (0.65–4.47) | NA                            | NA | NA | NA |
| Dolasetron+DROP vs Palonosetron+DEX                                                                                                                                                                                                                                                                                                                                                                                                                                                              | NA                              | NA               | NA    | 1.02 (0.14–7.27) | NA                            | NA | NA | NA |
| Granisetron+DROP vs Palonosetron+DEX                                                                                                                                                                                                                                                                                                                                                                                                                                                             | NA                              | NA               | NA    | 1.31 (0.20–8.75) | NA                            | NA | NA | NA |
| Granisetron+DROP vs Dolasetron+DROP                                                                                                                                                                                                                                                                                                                                                                                                                                                              | NA                              | NA               | NA    | 1.29 (0.32–5.24) | NA                            | NA | NA | NA |
| <b>Between-study heterogeneity</b>                                                                                                                                                                                                                                                                                                                                                                                                                                                               | <b>0.209</b>                    |                  |       |                  | <b>0.777</b>                  |    |    |    |
| <b>Design-by-treatment interaction model for inconsistency (<math>\chi^2</math>, d.f., P-value, heterogeneity)</b>                                                                                                                                                                                                                                                                                                                                                                               | <b>27.98 (31, 0.622, 0.212)</b> |                  |       |                  | <b>0.84 (3, 0.841, 0.950)</b> |    |    |    |
| <p><b>Abbreviations:</b> DEX dexamethasone, DROP droperidol (intravenous), METO Metoclopramide (intravenous), PONV post-operative nausea and vomiting, RCTs Randomized Controlled Trials, OR Odds Ratio, CI Confidence Interval, MA Meta-analysis, NMA Network Meta-analysis</p> <p><b>Note:</b> Treatment comparisons with - - for heterogeneity variance indicate that the between-study heterogeneity variance could not be estimated because a single study was included in the analysis</p> |                                 |                  |       |                  |                               |    |    |    |

**Appendix 12. Plot of the surface under the cumulative ranking (SUCRA) curves for the 15 treatments included in Vomiting.**

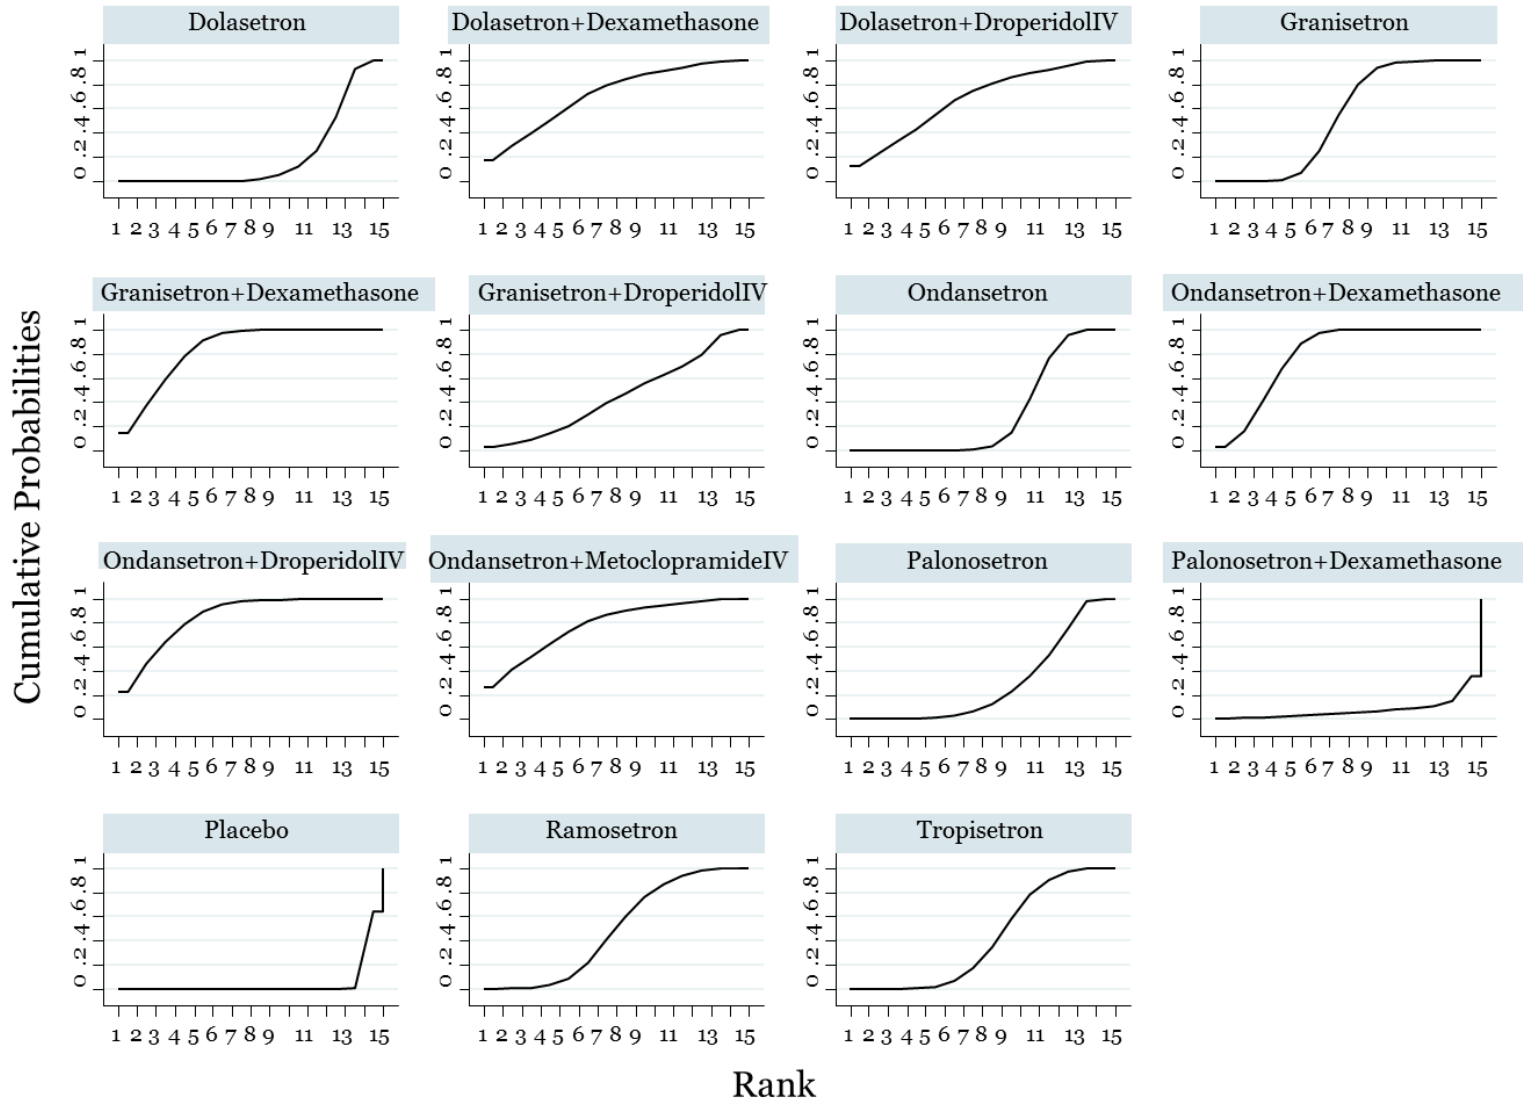

**Appendix 13. Network plots using colored edges according to the levels of the treatment effect modifier age of participants\***

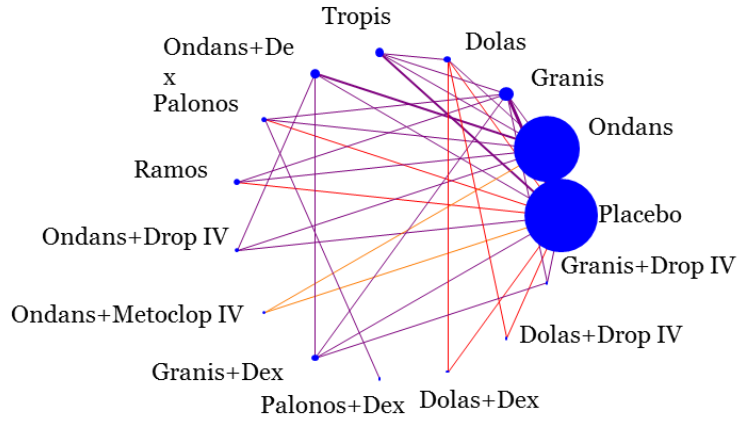

**a. Network of Vomiting**

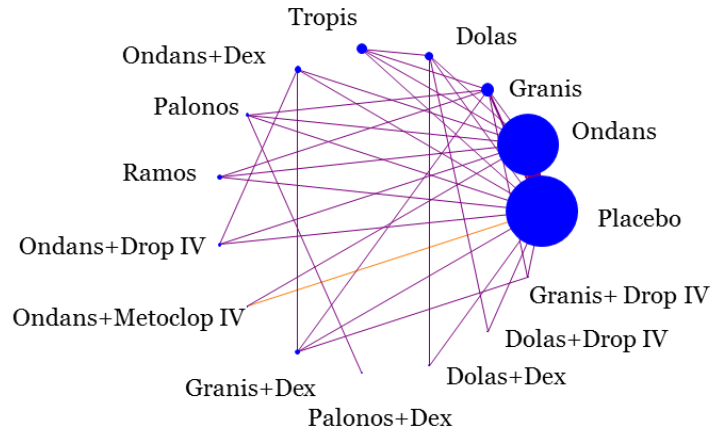

**b. Network of Nausea**

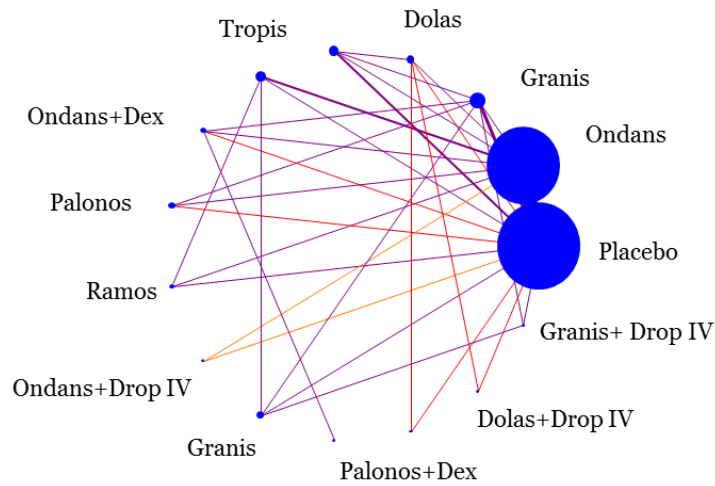

**c. Network of PONV**

\*Note: Each edge has been colored according to the mode of the study-specific levels: **Orange** corresponds to children, **Purple** corresponds to adults, and **Green** corresponds to all ages.

**Appendix 14. Network plots using colored edges according to the levels of the treatment effect modifier timing of administration**

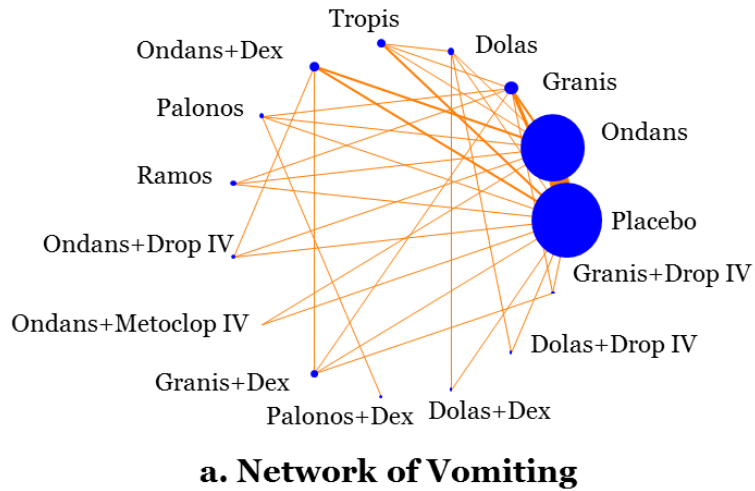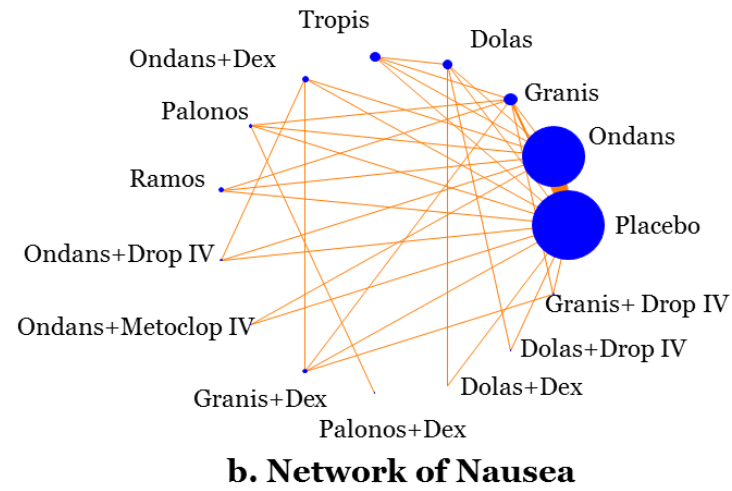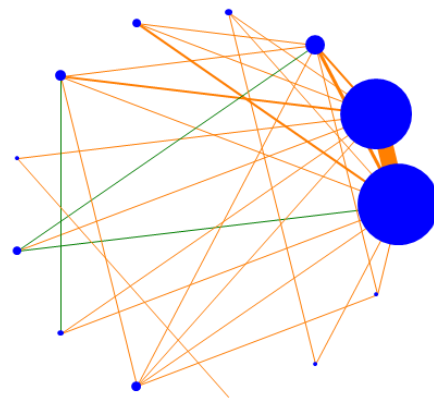

\*Note: Each edge has been colored according to the mode of the study-specific levels: **Orange** corresponds to administration during surgery, **Purple** corresponds to administration during and after surgery, **Green** corresponds to administration after surgery, and **Blue** corresponds to Pre.

## Appendix 15. Vomiting sub-group analysis results

| VOMITING                                 | <i>All time periods - all study designs</i> |        |         |               | <i>All time periods - RCTs only - sensitivity analysis for Risk of Bias</i> |        |         |               | <i>Intra-operative - RCTs only</i> |        |         |               |
|------------------------------------------|---------------------------------------------|--------|---------|---------------|-----------------------------------------------------------------------------|--------|---------|---------------|------------------------------------|--------|---------|---------------|
|                                          | OR                                          | CI_Low | CI_High | Heterogeneity | OR                                                                          | CI_Low | CI_High | Heterogeneity | OR                                 | CI_Low | CI_High | Heterogeneity |
| Ondansetron vs Placebo                   | 0.366                                       | 0.330  | 0.407   | 0.152         | 0.360                                                                       | 0.323  | 0.400   | 0.132         | 0.355                              | 0.318  | 0.397   | 0.129         |
| Granisetron vs Placebo                   | 0.263                                       | 0.204  | 0.339   | 0.152         | 0.268                                                                       | 0.208  | 0.345   | 0.132         | 0.263                              | 0.205  | 0.337   | 0.129         |
| Dolasetron vs Placebo                    | 0.423                                       | 0.292  | 0.613   | 0.152         | 0.433                                                                       | 0.295  | 0.634   | 0.132         | 0.433                              | 0.300  | 0.624   | 0.129         |
| Tropisetron vs Placebo                   | 0.312                                       | 0.224  | 0.433   | 0.152         | 0.331                                                                       | 0.238  | 0.461   | 0.132         | 0.315                              | 0.229  | 0.433   | 0.129         |
| Ondansetron+Dexamethasone vs Placebo     | 0.180                                       | 0.132  | 0.245   | 0.152         | 0.166                                                                       | 0.119  | 0.232   | 0.132         | 0.165                              | 0.118  | 0.231   | 0.129         |
| Palonosetron vs Placebo                  | 0.376                                       | 0.234  | 0.605   | 0.152         | 0.382                                                                       | 0.241  | 0.605   | 0.132         | 0.382                              | 0.241  | 0.604   | 0.129         |
| Ramosetron vs Placebo                    | 0.285                                       | 0.185  | 0.438   | 0.152         | 0.281                                                                       | 0.184  | 0.429   | 0.132         | 0.357                              | 0.229  | 0.557   | 0.129         |
| Ondansetron+DroperidolIV vs Placebo      | 0.146                                       | 0.079  | 0.269   | 0.152         | 0.141                                                                       | 0.077  | 0.259   | 0.132         | 0.127                              | 0.064  | 0.251   | 0.129         |
| Ondansetron+MetoclopramideIV vs Placebo  | 0.153                                       | 0.054  | 0.428   | 0.152         | 0.152                                                                       | 0.055  | 0.421   | 0.132         | 0.151                              | 0.055  | 0.418   | 0.129         |
| Granisetron+Dexamethasone vs Placebo     | 0.150                                       | 0.091  | 0.248   | 0.152         | 0.147                                                                       | 0.089  | 0.241   | 0.132         | 0.149                              | 0.091  | 0.243   | 0.129         |
| Palonosetron+Dexamethasone vs Placebo    | 1.403                                       | 0.195  | 10.120  | 0.152         | 1.426                                                                       | 0.201  | 10.140  | 0.132         | 1.426                              | 0.201  | 10.112  | 0.129         |
| Dolasetron+Dexamethasone vs Placebo      | 0.172                                       | 0.061  | 0.484   | 0.152         | 0.177                                                                       | 0.064  | 0.493   | 0.132         | 0.178                              | 0.065  | 0.490   | 0.129         |
| Dolasetron+DroperidolIV vs Placebo       | 0.192                                       | 0.070  | 0.530   | 0.152         | 0.194                                                                       | 0.072  | 0.520   | 0.132         | 0.194                              | 0.073  | 0.516   | 0.129         |
| Granisetron+DroperidolIV vs Placebo      | 0.305                                       | 0.112  | 0.831   | 0.152         | 0.307                                                                       | 0.114  | 0.824   | 0.132         | 0.306                              | 0.114  | 0.819   | 0.129         |
| Granisetron vs Ondansetron               | 0.717                                       | 0.550  | 0.934   | 0.152         | 0.745                                                                       | 0.572  | 0.971   | 0.132         | 0.740                              | 0.571  | 0.960   | 0.129         |
| Dolasetron vs Ondansetron                | 1.155                                       | 0.796  | 1.677   | 0.152         | 1.203                                                                       | 0.818  | 1.770   | 0.132         | 1.218                              | 0.841  | 1.765   | 0.129         |
| Tropisetron vs Ondansetron               | 0.850                                       | 0.606  | 1.193   | 0.152         | 0.920                                                                       | 0.655  | 1.293   | 0.132         | 0.886                              | 0.637  | 1.231   | 0.129         |
| Ondansetron+Dexamethasone vs Ondansetron | 0.492                                       | 0.362  | 0.668   | 0.152         | 0.462                                                                       | 0.332  | 0.643   | 0.132         | 0.465                              | 0.333  | 0.648   | 0.129         |
| Palonosetron vs Ondansetron              | 1.026                                       | 0.635  | 1.659   | 0.152         | 1.062                                                                       | 0.667  | 1.691   | 0.132         | 1.074                              | 0.676  | 1.707   | 0.129         |

|                                             |       |       |        |       |       |       |        |       |       |       |        |       |
|---------------------------------------------|-------|-------|--------|-------|-------|-------|--------|-------|-------|-------|--------|-------|
| Ramosetron vs Ondansetron                   | 0.777 | 0.505 | 1.194  | 0.152 | 0.782 | 0.513 | 1.190  | 0.132 | 1.005 | 0.643 | 1.570  | 0.129 |
| Ondansetron+DroperidolIV vs Ondansetron     | 0.398 | 0.216 | 0.734  | 0.152 | 0.393 | 0.215 | 0.718  | 0.132 | 0.357 | 0.181 | 0.707  | 0.129 |
| Ondansetron+MetoclopramideIV vs Ondansetron | 0.417 | 0.148 | 1.170  | 0.152 | 0.423 | 0.153 | 1.170  | 0.132 | 0.426 | 0.154 | 1.176  | 0.129 |
| Granisetron+Dexamethasone vs Ondansetron    | 0.410 | 0.248 | 0.680  | 0.152 | 0.408 | 0.247 | 0.672  | 0.132 | 0.419 | 0.256 | 0.687  | 0.129 |
| Palonosetron+Dexamethasone vs Ondansetron   | 3.830 | 0.530 | 27.652 | 0.152 | 3.965 | 0.557 | 28.223 | 0.132 | 4.012 | 0.565 | 28.493 | 0.129 |
| Dolasetron+Dexamethasone vs Ondansetron     | 0.468 | 0.166 | 1.323  | 0.152 | 0.493 | 0.177 | 1.371  | 0.132 | 0.500 | 0.181 | 1.381  | 0.129 |
| Dolasetron+DroperidolIV vs Ondansetron      | 0.524 | 0.189 | 1.451  | 0.152 | 0.538 | 0.200 | 1.451  | 0.132 | 0.545 | 0.203 | 1.460  | 0.129 |
| Granisetron+DroperidolIV vs Ondansetron     | 0.832 | 0.304 | 2.275  | 0.152 | 0.852 | 0.316 | 2.299  | 0.132 | 0.860 | 0.320 | 2.314  | 0.129 |
| Dolasetron vs Granisetron                   | 1.612 | 1.032 | 2.519  | 0.152 | 1.615 | 1.023 | 2.547  | 0.132 | 1.646 | 1.060 | 2.554  | 0.129 |
| Tropisetron vs Granisetron                  | 1.187 | 0.785 | 1.793  | 0.152 | 1.235 | 0.817 | 1.865  | 0.132 | 1.196 | 0.802 | 1.783  | 0.129 |
| Ondansetron+Dexamethasone vs Granisetron    | 0.686 | 0.466 | 1.012  | 0.152 | 0.619 | 0.412 | 0.932  | 0.132 | 0.628 | 0.419 | 0.942  | 0.129 |
| Palonosetron vs Granisetron                 | 1.432 | 0.847 | 2.423  | 0.152 | 1.425 | 0.854 | 2.376  | 0.132 | 1.451 | 0.874 | 2.409  | 0.129 |
| Ramosetron vs Granisetron                   | 1.084 | 0.661 | 1.777  | 0.152 | 1.049 | 0.646 | 1.703  | 0.132 | 1.357 | 0.822 | 2.242  | 0.129 |
| Ondansetron+DroperidolIV vs Granisetron     | 0.555 | 0.286 | 1.076  | 0.152 | 0.527 | 0.274 | 1.012  | 0.132 | 0.483 | 0.234 | 0.995  | 0.129 |
| Ondansetron+MetoclopramideIV vs Granisetron | 0.581 | 0.201 | 1.681  | 0.152 | 0.567 | 0.199 | 1.616  | 0.132 | 0.575 | 0.203 | 1.633  | 0.129 |
| Granisetron+Dexamethasone vs Granisetron    | 0.573 | 0.347 | 0.946  | 0.152 | 0.547 | 0.333 | 0.897  | 0.132 | 0.566 | 0.347 | 0.924  | 0.129 |
| Palonosetron+Dexamethasone vs Granisetron   | 5.345 | 0.732 | 39.039 | 0.152 | 5.319 | 0.739 | 38.298 | 0.132 | 5.420 | 0.755 | 38.902 | 0.129 |
| Dolasetron+Dexamethasone vs Granisetron     | 0.654 | 0.225 | 1.897  | 0.152 | 0.662 | 0.232 | 1.890  | 0.132 | 0.676 | 0.239 | 1.915  | 0.129 |
| Dolasetron+DroperidolIV vs Granisetron      | 0.731 | 0.257 | 2.082  | 0.152 | 0.722 | 0.261 | 2.001  | 0.132 | 0.736 | 0.267 | 2.024  | 0.129 |
| Granisetron+DroperidolIV vs Granisetron     | 1.161 | 0.424 | 3.176  | 0.152 | 1.143 | 0.424 | 3.084  | 0.132 | 1.161 | 0.432 | 3.124  | 0.129 |
| Tropisetron vs Dolasetron                   | 0.736 | 0.456 | 1.188  | 0.152 | 0.765 | 0.470 | 1.245  | 0.132 | 0.727 | 0.455 | 1.162  | 0.129 |

|                                             |       |       |        |       |       |       |        |       |       |       |        |       |
|---------------------------------------------|-------|-------|--------|-------|-------|-------|--------|-------|-------|-------|--------|-------|
| Ondansetron+Dexamethasone vs Dolasetron     | 0.426 | 0.265 | 0.685  | 0.152 | 0.384 | 0.232 | 0.635  | 0.132 | 0.381 | 0.233 | 0.624  | 0.129 |
| Palonosetron vs Dolasetron                  | 0.888 | 0.488 | 1.618  | 0.152 | 0.882 | 0.486 | 1.601  | 0.132 | 0.882 | 0.492 | 1.581  | 0.129 |
| Ramosetron vs Dolasetron                    | 0.672 | 0.382 | 1.182  | 0.152 | 0.650 | 0.369 | 1.143  | 0.132 | 0.825 | 0.465 | 1.462  | 0.129 |
| Ondansetron+DroperidolIV vs Dolasetron      | 0.344 | 0.169 | 0.703  | 0.152 | 0.326 | 0.160 | 0.665  | 0.132 | 0.293 | 0.136 | 0.634  | 0.129 |
| Ondansetron+MetoclopramideIV vs Dolasetron  | 0.361 | 0.121 | 1.077  | 0.152 | 0.351 | 0.119 | 1.040  | 0.132 | 0.350 | 0.119 | 1.027  | 0.129 |
| Granisetron+Dexamethasone vs Dolasetron     | 0.355 | 0.191 | 0.660  | 0.152 | 0.339 | 0.182 | 0.631  | 0.132 | 0.344 | 0.187 | 0.632  | 0.129 |
| Palonosetron+Dexamethasone vs Dolasetron    | 3.315 | 0.445 | 24.726 | 0.152 | 3.295 | 0.447 | 24.286 | 0.132 | 3.293 | 0.449 | 24.143 | 0.129 |
| Dolasetron+Dexamethasone vs Dolasetron      | 0.406 | 0.150 | 1.093  | 0.152 | 0.410 | 0.155 | 1.083  | 0.132 | 0.411 | 0.156 | 1.081  | 0.129 |
| Dolasetron+DroperidolIV vs Dolasetron       | 0.453 | 0.163 | 1.261  | 0.152 | 0.447 | 0.165 | 1.210  | 0.132 | 0.447 | 0.166 | 1.202  | 0.129 |
| Granisetron+DroperidolIV vs Dolasetron      | 0.720 | 0.247 | 2.095  | 0.152 | 0.708 | 0.246 | 2.042  | 0.132 | 0.706 | 0.247 | 2.018  | 0.129 |
| Ondansetron+Dexamethasone vs Tropisetron    | 0.578 | 0.370 | 0.904  | 0.152 | 0.502 | 0.314 | 0.800  | 0.132 | 0.525 | 0.331 | 0.831  | 0.129 |
| Palonosetron vs Tropisetron                 | 1.207 | 0.681 | 2.140  | 0.152 | 1.154 | 0.659 | 2.020  | 0.132 | 1.213 | 0.699 | 2.104  | 0.129 |
| Ramosetron vs Tropisetron                   | 0.913 | 0.531 | 1.570  | 0.152 | 0.849 | 0.498 | 1.449  | 0.132 | 1.135 | 0.658 | 1.958  | 0.129 |
| Ondansetron+DroperidolIV vs Tropisetron     | 0.468 | 0.233 | 0.938  | 0.152 | 0.427 | 0.214 | 0.849  | 0.132 | 0.404 | 0.190 | 0.856  | 0.129 |
| Ondansetron+MetoclopramideIV vs Tropisetron | 0.490 | 0.166 | 1.445  | 0.152 | 0.459 | 0.158 | 1.337  | 0.132 | 0.481 | 0.166 | 1.392  | 0.129 |
| Granisetron+Dexamethasone vs Tropisetron    | 0.483 | 0.266 | 0.874  | 0.152 | 0.443 | 0.245 | 0.799  | 0.132 | 0.474 | 0.266 | 0.844  | 0.129 |
| Palonosetron+Dexamethasone vs Tropisetron   | 4.504 | 0.609 | 33.324 | 0.152 | 4.308 | 0.591 | 31.427 | 0.132 | 4.531 | 0.624 | 32.906 | 0.129 |
| Dolasetron+Dexamethasone vs Tropisetron     | 0.551 | 0.187 | 1.622  | 0.152 | 0.536 | 0.185 | 1.552  | 0.132 | 0.565 | 0.197 | 1.621  | 0.129 |
| Dolasetron+DroperidolIV vs Tropisetron      | 0.616 | 0.212 | 1.786  | 0.152 | 0.585 | 0.207 | 1.651  | 0.132 | 0.615 | 0.220 | 1.721  | 0.129 |
| Granisetron+DroperidolIV vs Tropisetron     | 0.978 | 0.341 | 2.807  | 0.152 | 0.926 | 0.327 | 2.622  | 0.132 | 0.971 | 0.345 | 2.732  | 0.129 |

|                                                           |       |       |        |       |       |       |        |       |       |       |        |       |
|-----------------------------------------------------------|-------|-------|--------|-------|-------|-------|--------|-------|-------|-------|--------|-------|
| Palonosetron vs Ondansetron+Dexamethasone                 | 2.086 | 1.191 | 3.655  | 0.152 | 2.300 | 1.307 | 4.045  | 0.132 | 2.312 | 1.316 | 4.060  | 0.129 |
| Ramosetron vs Ondansetron+Dexamethasone                   | 1.579 | 0.935 | 2.666  | 0.152 | 1.693 | 0.995 | 2.881  | 0.132 | 2.162 | 1.246 | 3.754  | 0.129 |
| Ondansetron+DroperidolIV vs Ondansetron+Dexamethasone     | 0.809 | 0.422 | 1.548  | 0.152 | 0.851 | 0.445 | 1.625  | 0.132 | 0.769 | 0.372 | 1.591  | 0.129 |
| Ondansetron+MetoclopramideIV vs Ondansetron+Dexamethasone | 0.847 | 0.289 | 2.479  | 0.152 | 0.916 | 0.315 | 2.665  | 0.132 | 0.917 | 0.316 | 2.662  | 0.129 |
| Granisetron+Dexamethasone vs Ondansetron+Dexamethasone    | 0.834 | 0.485 | 1.436  | 0.152 | 0.883 | 0.509 | 1.531  | 0.132 | 0.902 | 0.525 | 1.551  | 0.129 |
| Palonosetron+Dexamethasone vs Ondansetron+Dexamethasone   | 7.786 | 1.056 | 57.415 | 0.152 | 8.588 | 1.176 | 62.730 | 0.132 | 8.633 | 1.185 | 62.921 | 0.129 |
| Dolasetron+Dexamethasone vs Ondansetron+Dexamethasone     | 0.952 | 0.324 | 2.800  | 0.152 | 1.068 | 0.366 | 3.120  | 0.132 | 1.077 | 0.371 | 3.125  | 0.129 |
| Dolasetron+DroperidolIV vs Ondansetron+Dexamethasone      | 1.065 | 0.369 | 3.075  | 0.152 | 1.166 | 0.411 | 3.305  | 0.132 | 1.172 | 0.416 | 3.305  | 0.129 |
| Granisetron+DroperidolIV vs Ondansetron+Dexamethasone     | 1.691 | 0.596 | 4.798  | 0.152 | 1.846 | 0.654 | 5.210  | 0.132 | 1.850 | 0.657 | 5.208  | 0.129 |
| Ramosetron vs Palonosetron                                | 0.757 | 0.399 | 1.436  | 0.152 | 0.736 | 0.395 | 1.372  | 0.132 | 0.935 | 0.495 | 1.767  | 0.129 |
| Ondansetron+DroperidolIV vs Palonosetron                  | 0.388 | 0.179 | 0.841  | 0.152 | 0.370 | 0.173 | 0.790  | 0.132 | 0.333 | 0.147 | 0.755  | 0.129 |
| Ondansetron+MetoclopramideIV vs Palonosetron              | 0.406 | 0.131 | 1.262  | 0.152 | 0.398 | 0.131 | 1.213  | 0.132 | 0.397 | 0.131 | 1.204  | 0.129 |
| Granisetron+Dexamethasone vs Palonosetron                 | 0.400 | 0.203 | 0.790  | 0.152 | 0.384 | 0.197 | 0.747  | 0.132 | 0.390 | 0.202 | 0.755  | 0.129 |
| Palonosetron+Dexamethasone vs Palonosetron                | 3.732 | 0.548 | 25.399 | 0.152 | 3.734 | 0.555 | 25.131 | 0.132 | 3.735 | 0.556 | 25.087 | 0.129 |
| Dolasetron+Dexamethasone vs Palonosetron                  | 0.457 | 0.147 | 1.422  | 0.152 | 0.464 | 0.152 | 1.417  | 0.132 | 0.466 | 0.154 | 1.410  | 0.129 |
| Dolasetron+DroperidolIV vs Palonosetron                   | 0.510 | 0.166 | 1.567  | 0.152 | 0.507 | 0.170 | 1.507  | 0.132 | 0.507 | 0.172 | 1.497  | 0.129 |
| Granisetron+DroperidolIV vs Palonosetron                  | 0.811 | 0.268 | 2.449  | 0.152 | 0.803 | 0.271 | 2.379  | 0.132 | 0.800 | 0.271 | 2.363  | 0.129 |
| Ondansetron+DroperidolIV vs Ramosetron                    | 0.512 | 0.243 | 1.080  | 0.152 | 0.502 | 0.242 | 1.045  | 0.132 | 0.356 | 0.158 | 0.800  | 0.129 |
| Ondansetron+MetoclopramideIV                              | 0.536 | 0.176 | 1.638  | 0.152 | 0.541 | 0.180 | 1.623  | 0.132 | 0.424 | 0.140 | 1.281  | 0.129 |



|                                                            |       |       |        |       |        |       |        |       |        |       |        |       |
|------------------------------------------------------------|-------|-------|--------|-------|--------|-------|--------|-------|--------|-------|--------|-------|
| vs Ramosetron                                              |       |       |        |       |        |       |        |       |        |       |        |       |
| Granisetron+Dexamethasone vs Ramosetron                    | 0.528 | 0.274 | 1.019  | 0.152 | 0.521  | 0.273 | 0.995  | 0.132 | 0.417  | 0.216 | 0.804  | 0.129 |
| Palonosetron+Dexamethasone vs Ramosetron                   | 4.931 | 0.653 | 37.239 | 0.152 | 5.072  | 0.683 | 37.690 | 0.132 | 3.993  | 0.536 | 29.741 | 0.129 |
| Dolasetron+Dexamethasone vs Ramosetron                     | 0.603 | 0.196 | 1.852  | 0.152 | 0.631  | 0.209 | 1.901  | 0.132 | 0.498  | 0.165 | 1.504  | 0.129 |
| Dolasetron+DroperidolIV vs Ramosetron                      | 0.674 | 0.224 | 2.032  | 0.152 | 0.688  | 0.235 | 2.013  | 0.132 | 0.542  | 0.185 | 1.591  | 0.129 |
| Granisetron+DroperidolIV vs Ramosetron                     | 1.071 | 0.360 | 3.186  | 0.152 | 1.090  | 0.373 | 3.189  | 0.132 | 0.856  | 0.291 | 2.519  | 0.129 |
| Ondansetron+MetoclopramideIV vs Ondansetron+DroperidolIV   | 1.048 | 0.316 | 3.473  | 0.152 | 1.077  | 0.330 | 3.507  | 0.132 | 1.192  | 0.352 | 4.041  | 0.129 |
| Granisetron+Dexamethasone vs Ondansetron+DroperidolIV      | 1.032 | 0.471 | 2.258  | 0.152 | 1.038  | 0.479 | 2.246  | 0.132 | 1.174  | 0.511 | 2.693  | 0.129 |
| Palonosetron+Dexamethasone vs Ondansetron+DroperidolIV     | 9.629 | 1.217 | 76.188 | 0.152 | 10.095 | 1.297 | 78.573 | 0.132 | 11.228 | 1.411 | 89.308 | 0.129 |
| Dolasetron+Dexamethasone vs Ondansetron+DroperidolIV       | 1.178 | 0.354 | 3.924  | 0.152 | 1.255  | 0.384 | 4.107  | 0.132 | 1.400  | 0.413 | 4.745  | 0.129 |
| Dolasetron+DroperidolIV vs Ondansetron+DroperidolIV        | 1.317 | 0.402 | 4.313  | 0.152 | 1.370  | 0.431 | 4.359  | 0.132 | 1.524  | 0.462 | 5.033  | 0.129 |
| Granisetron+DroperidolIV vs Ondansetron+DroperidolIV       | 2.091 | 0.646 | 6.767  | 0.152 | 2.170  | 0.682 | 6.903  | 0.132 | 2.406  | 0.727 | 7.967  | 0.129 |
| Granisetron+Dexamethasone vs Ondansetron+MetoclopramideIV  | 0.985 | 0.314 | 3.094  | 0.152 | 0.964  | 0.312 | 2.982  | 0.132 | 0.984  | 0.320 | 3.029  | 0.129 |
| Palonosetron+Dexamethasone vs Ondansetron+MetoclopramideIV | 9.192 | 0.990 | 85.306 | 0.152 | 9.378  | 1.030 | 85.342 | 0.132 | 9.417  | 1.038 | 85.419 | 0.129 |
| Dolasetron+Dexamethasone vs Ondansetron+MetoclopramideIV   | 1.124 | 0.261 | 4.846  | 0.152 | 1.166  | 0.276 | 4.919  | 0.132 | 1.175  | 0.280 | 4.920  | 0.129 |
| Dolasetron+DroperidolIV vs Ondansetron+MetoclopramideIV    | 1.257 | 0.296 | 5.346  | 0.152 | 1.273  | 0.308 | 5.252  | 0.132 | 1.278  | 0.312 | 5.244  | 0.129 |
| Granisetron+DroperidolIV vs Ondansetron+MetoclopramideIV   | 1.996 | 0.474 | 8.409  | 0.152 | 2.016  | 0.488 | 8.320  | 0.132 | 2.018  | 0.491 | 8.298  | 0.129 |

|                                                                                                                    |                                 |       |        |       |                                  |       |        |       |                                 |       |        |       |
|--------------------------------------------------------------------------------------------------------------------|---------------------------------|-------|--------|-------|----------------------------------|-------|--------|-------|---------------------------------|-------|--------|-------|
| Palonosetron+Dexamethasone vs Granisetron+Dexamethasone                                                            | 9.332                           | 1.220 | 71.395 | 0.152 | 9.728                            | 1.291 | 73.293 | 0.132 | 9.567                           | 1.275 | 71.802 | 0.129 |
| Dolasetron+Dexamethasone vs Granisetron+Dexamethasone                                                              | 1.141                           | 0.362 | 3.596  | 0.152 | 1.210                            | 0.390 | 3.749  | 0.132 | 1.193                           | 0.389 | 3.663  | 0.129 |
| Dolasetron+DroperidolIV vs Granisetron+Dexamethasone                                                               | 1.276                           | 0.412 | 3.958  | 0.152 | 1.320                            | 0.437 | 3.985  | 0.132 | 1.299                           | 0.434 | 3.886  | 0.129 |
| Granisetron+DroperidolIV vs Granisetron+Dexamethasone                                                              | 2.027                           | 0.695 | 5.913  | 0.152 | 2.091                            | 0.727 | 6.013  | 0.132 | 2.050                           | 0.716 | 5.872  | 0.129 |
| Dolasetron+Dexamethasone vs Palonosetron+Dexamethasone                                                             | 0.122                           | 0.013 | 1.136  | 0.152 | 0.124                            | 0.014 | 1.132  | 0.132 | 0.125                           | 0.014 | 1.129  | 0.129 |
| Dolasetron+DroperidolIV vs Palonosetron+Dexamethasone                                                              | 0.137                           | 0.015 | 1.261  | 0.152 | 0.136                            | 0.015 | 1.220  | 0.132 | 0.136                           | 0.015 | 1.214  | 0.129 |
| Granisetron+DroperidolIV vs Palonosetron+Dexamethasone                                                             | 0.217                           | 0.024 | 1.987  | 0.152 | 0.215                            | 0.024 | 1.929  | 0.132 | 0.214                           | 0.024 | 1.917  | 0.129 |
| Dolasetron+DroperidolIV vs Dolasetron+Dexamethasone                                                                | 1.118                           | 0.271 | 4.607  | 0.152 | 1.091                            | 0.274 | 4.347  | 0.132 | 1.088                           | 0.275 | 4.307  | 0.129 |
| Granisetron+DroperidolIV vs Dolasetron+Dexamethasone                                                               | 1.775                           | 0.420 | 7.500  | 0.152 | 1.728                            | 0.418 | 7.149  | 0.132 | 1.718                           | 0.418 | 7.055  | 0.129 |
| Granisetron+DroperidolIV vs Dolasetron+DroperidolIV                                                                | 1.588                           | 0.381 | 6.615  | 0.152 | 1.584                            | 0.392 | 6.406  | 0.132 | 1.579                           | 0.393 | 6.345  | 0.129 |
| <b>Design-by-treatment interaction model for inconsistency (<math>\chi^2</math>, d.f., P-value, heterogeneity)</b> | <b>49.27 (44, 0.271, 0.151)</b> |       |        |       | <b>45.67 (41, 0.2843, 0.134)</b> |       |        |       | <b>50.95 (42, 0.162, 0.121)</b> |       |        |       |

**Appendix 16. Nausea network meta-analysis results forest plot versus placebo\***

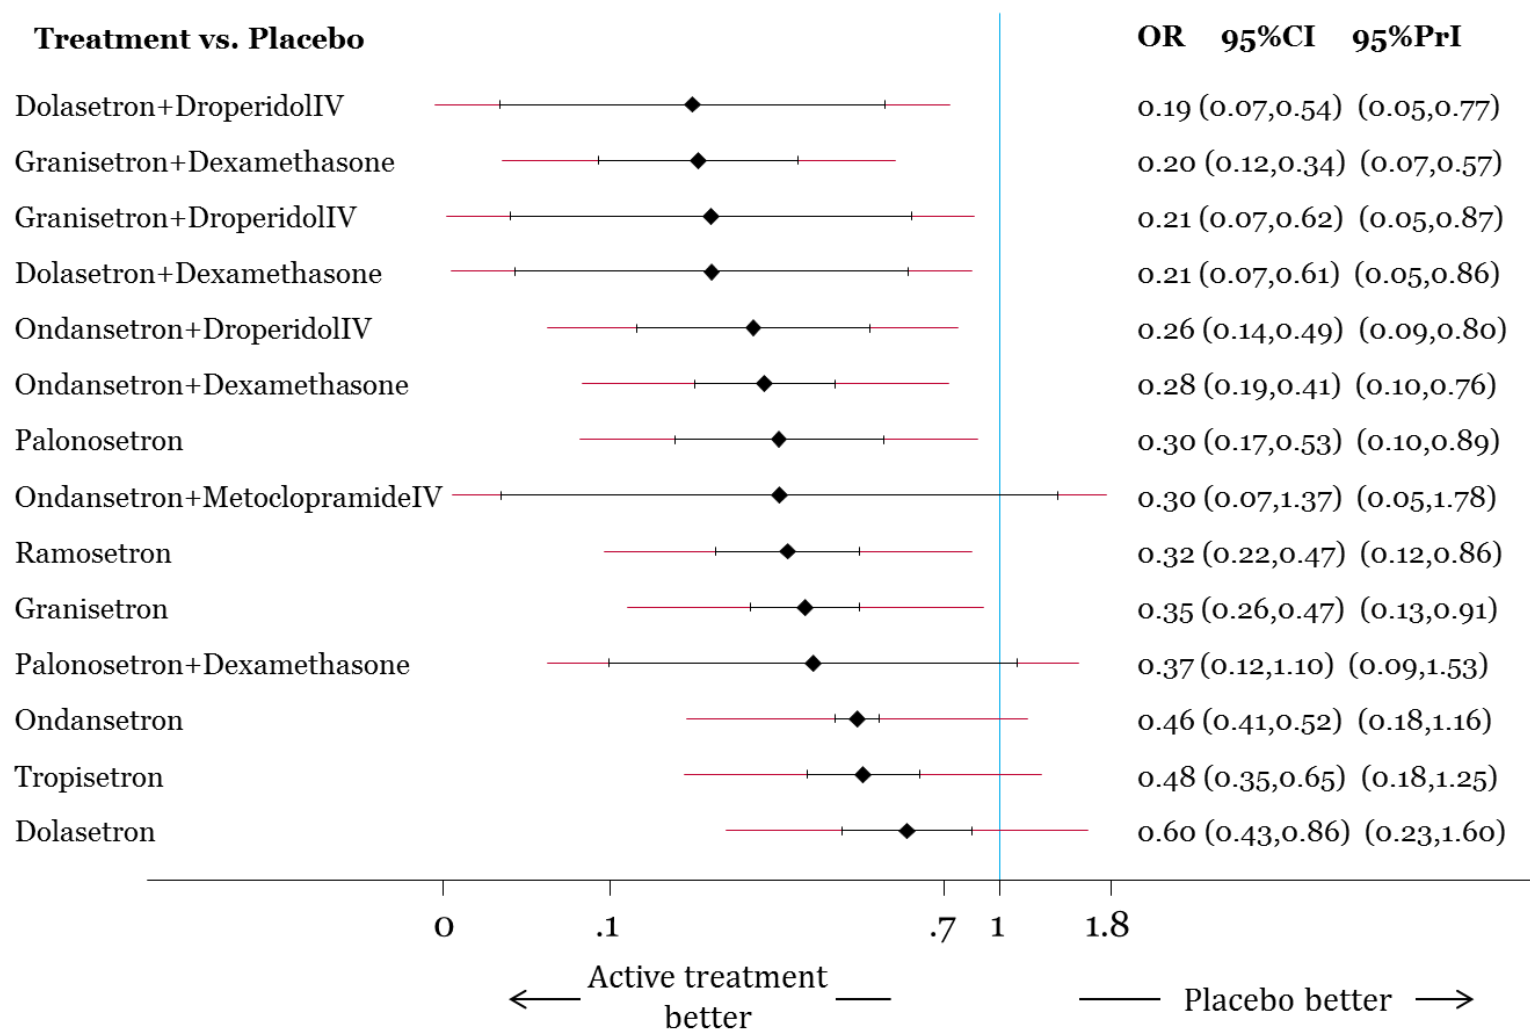

Network Estimates using the random effects model and a common within-network heterogeneity

\*Note: All treatments are compared to placebo. The black horizontal lines represent the 95% confidence intervals (CI) of the summary treatment effects and red horizontal lines the 95% predictive intervals (PrI). The results are presented on the odds ratio scale.

Appendix 17. Plot of the surface under the cumulative ranking (SUCRA) curves for the 15 treatments included in Nausea.

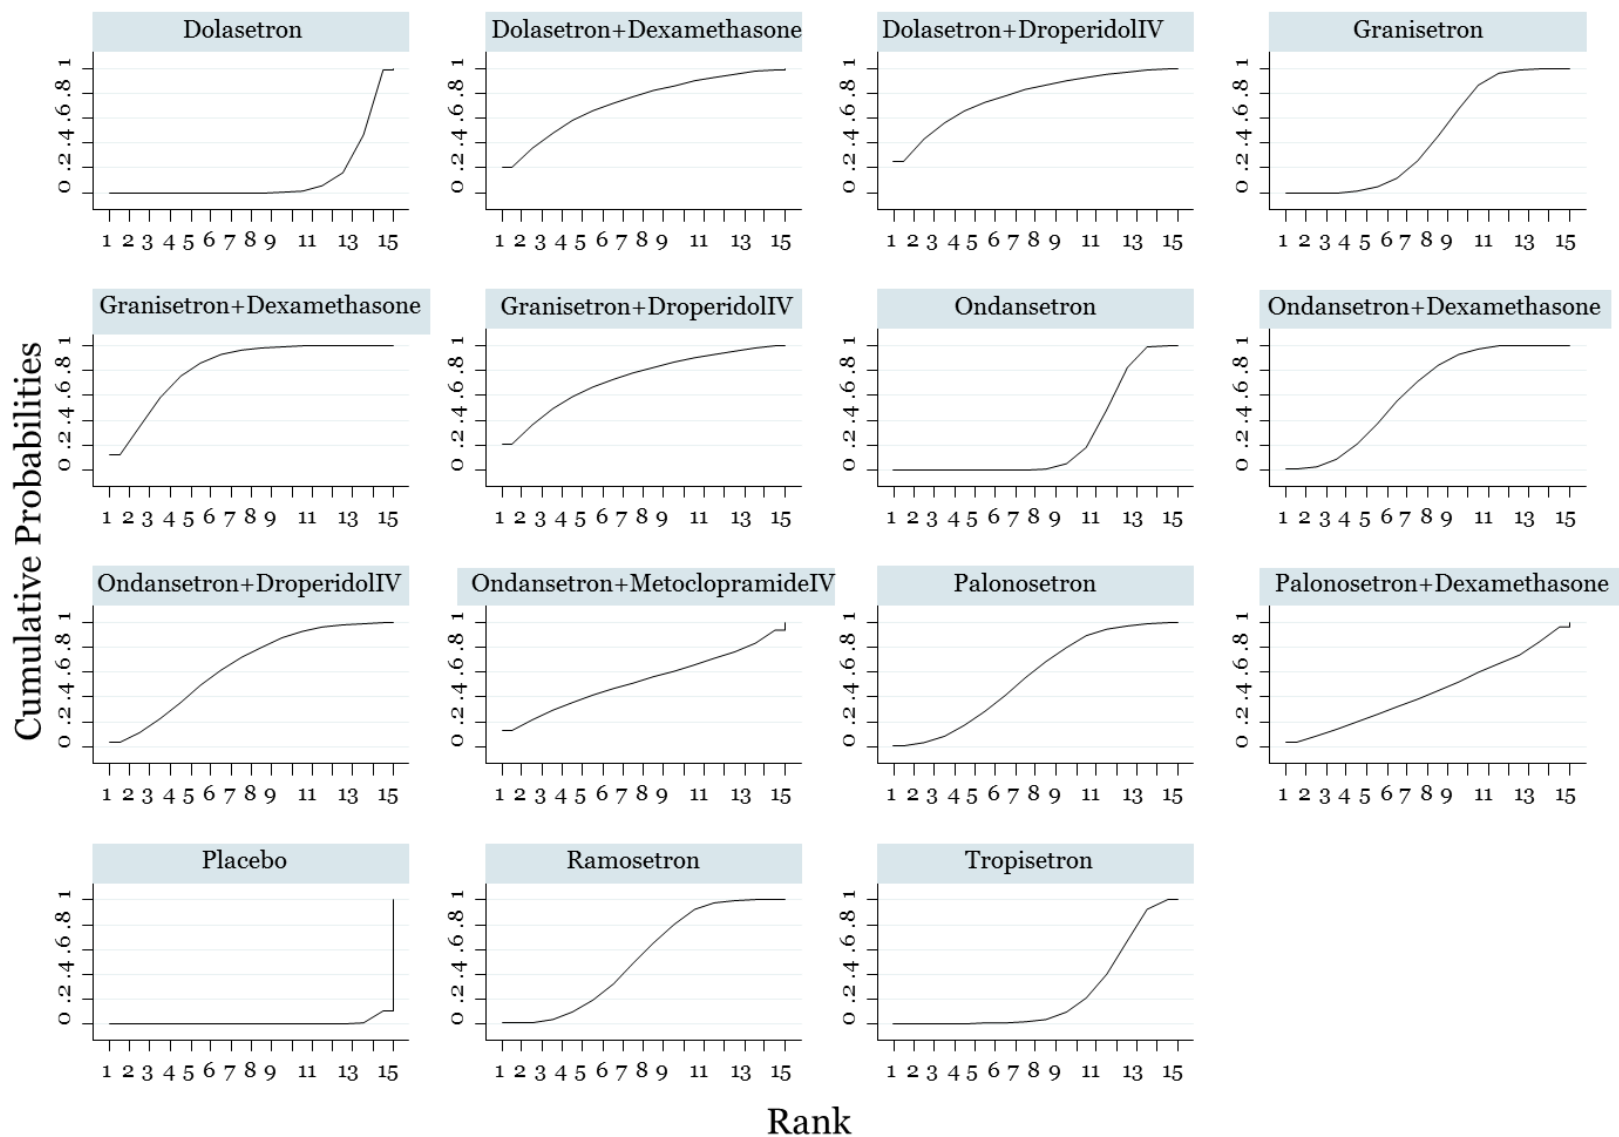

## Appendix 18. Nausea sub-group analysis results

| NAUSEA                                   | <i>All time periods - all study designs</i> |               |                |                      | <i>All time periods - RCTs only - sensitivity analysis for Risk of Bias</i> |               |                |                      | <i>Intra-operative - RCTs only</i> |               |                |                      |
|------------------------------------------|---------------------------------------------|---------------|----------------|----------------------|-----------------------------------------------------------------------------|---------------|----------------|----------------------|------------------------------------|---------------|----------------|----------------------|
| <b>Treatment Comparison</b>              | <b>OR</b>                                   | <b>CI_Low</b> | <b>CI_High</b> | <b>Heterogeneity</b> | <b>OR</b>                                                                   | <b>CI_Low</b> | <b>CI_High</b> | <b>Heterogeneity</b> | <b>OR</b>                          | <b>CI_Low</b> | <b>CI_High</b> | <b>Heterogeneity</b> |
| Ondansetron vs Placebo                   | 0.455                                       | 0.402         | 0.514          | 0.240                | 0.451                                                                       | 0.398         | 0.511          | 0.214                | 0.444                              | 0.391         | 0.506          | 0.218                |
| Granisetron vs Placebo                   | 0.345                                       | 0.254         | 0.467          | 0.240                | 0.353                                                                       | 0.260         | 0.479          | 0.214                | 0.347                              | 0.257         | 0.467          | 0.218                |
| Dolasetron vs Placebo                    | 0.578                                       | 0.407         | 0.821          | 0.240                | 0.602                                                                       | 0.424         | 0.853          | 0.214                | 0.600                              | 0.413         | 0.872          | 0.218                |
| Tropisetron vs Placebo                   | 0.475                                       | 0.347         | 0.650          | 0.240                | 0.499                                                                       | 0.360         | 0.692          | 0.214                | 0.451                              | 0.324         | 0.628          | 0.218                |
| Ondansetron+Dexamethasone vs Placebo     | 0.230                                       | 0.160         | 0.332          | 0.240                | 0.278                                                                       | 0.189         | 0.407          | 0.214                | 0.274                              | 0.186         | 0.402          | 0.218                |
| Palonosetron vs Placebo                  | 0.298                                       | 0.166         | 0.534          | 0.240                | 0.302                                                                       | 0.172         | 0.531          | 0.214                | 0.300                              | 0.170         | 0.529          | 0.218                |
| Ramosetron vs Placebo                    | 0.314                                       | 0.211         | 0.470          | 0.240                | 0.314                                                                       | 0.213         | 0.463          | 0.214                | 0.341                              | 0.225         | 0.517          | 0.218                |
| Ondansetron+DroperidolIV vs Placebo      | 0.251                                       | 0.132         | 0.476          | 0.240                | 0.259                                                                       | 0.138         | 0.486          | 0.214                | 0.238                              | 0.122         | 0.465          | 0.218                |
| Ondansetron+MetoclopramideIV vs Placebo  | 0.301                                       | 0.066         | 1.374          | 0.240                | 0.301                                                                       | 0.067         | 1.349          | 0.214                | 0.298                              | 0.066         | 1.341          | 0.218                |
| Granisetron+Dexamethasone vs Placebo     | 0.191                                       | 0.110         | 0.330          | 0.240                | 0.198                                                                       | 0.115         | 0.338          | 0.214                | 0.195                              | 0.114         | 0.335          | 0.218                |
| Palonosetron+Dexamethasone vs Placebo    | 0.359                                       | 0.115         | 1.117          | 0.240                | 0.363                                                                       | 0.121         | 1.092          | 0.214                | 0.361                              | 0.119         | 1.089          | 0.218                |
| Dolasetron+Dexamethasone vs Placebo      | 0.203                                       | 0.068         | 0.605          | 0.240                | 0.211                                                                       | 0.073         | 0.611          | 0.214                | 0.210                              | 0.072         | 0.615          | 0.218                |
| Dolasetron+DroperidolIV vs Placebo       | 0.187                                       | 0.064         | 0.549          | 0.240                | 0.190                                                                       | 0.067         | 0.540          | 0.214                | 0.190                              | 0.067         | 0.543          | 0.218                |
| Granisetron+DroperidolIV vs Placebo      | 0.208                                       | 0.069         | 0.624          | 0.240                | 0.211                                                                       | 0.071         | 0.624          | 0.214                | 0.209                              | 0.071         | 0.620          | 0.218                |
| Granisetron vs Ondansetron               | 0.758                                       | 0.553         | 1.040          | 0.240                | 0.782                                                                       | 0.569         | 1.076          | 0.214                | 0.780                              | 0.571         | 1.064          | 0.218                |
| Dolasetron vs Ondansetron                | 1.271                                       | 0.889         | 1.817          | 0.240                | 1.334                                                                       | 0.933         | 1.909          | 0.214                | 1.350                              | 0.922         | 1.976          | 0.218                |
| Tropisetron vs Ondansetron               | 1.045                                       | 0.753         | 1.449          | 0.240                | 1.107                                                                       | 0.786         | 1.561          | 0.214                | 1.015                              | 0.720         | 1.431          | 0.218                |
| Ondansetron+Dexamethasone vs Ondansetron | 0.507                                       | 0.353         | 0.728          | 0.240                | 0.616                                                                       | 0.422         | 0.899          | 0.214                | 0.616                              | 0.421         | 0.900          | 0.218                |
| Palonosetron vs Ondansetron              | 0.656                                       | 0.364         | 1.181          | 0.240                | 0.670                                                                       | 0.379         | 1.185          | 0.214                | 0.675                              | 0.381         | 1.198          | 0.218                |
| Ramosetron vs Ondansetron                | 0.692                                       | 0.465         | 1.029          | 0.240                | 0.696                                                                       | 0.473         | 1.023          | 0.214                | 0.768                              | 0.507         | 1.164          | 0.218                |

|                                             |       |       |       |       |       |       |       |       |       |       |       |       |
|---------------------------------------------|-------|-------|-------|-------|-------|-------|-------|-------|-------|-------|-------|-------|
| Ondansetron+DroperidolIV vs Ondansetron     | 0.551 | 0.291 | 1.043 | 0.240 | 0.575 | 0.309 | 1.071 | 0.214 | 0.535 | 0.275 | 1.042 | 0.218 |
| Ondansetron+MetoclopramideIV vs Ondansetron | 0.663 | 0.146 | 3.020 | 0.240 | 0.667 | 0.149 | 2.991 | 0.214 | 0.671 | 0.149 | 3.017 | 0.218 |
| Granisetron+Dexamethasone vs Ondansetron    | 0.420 | 0.240 | 0.733 | 0.240 | 0.438 | 0.254 | 0.757 | 0.214 | 0.439 | 0.254 | 0.760 | 0.218 |
| Palonosetron+Dexamethasone vs Ondansetron   | 0.790 | 0.253 | 2.464 | 0.240 | 0.805 | 0.267 | 2.428 | 0.214 | 0.812 | 0.268 | 2.459 | 0.218 |
| Dolasetron+Dexamethasone vs Ondansetron     | 0.448 | 0.150 | 1.334 | 0.240 | 0.467 | 0.161 | 1.360 | 0.214 | 0.473 | 0.161 | 1.388 | 0.218 |
| Dolasetron+DroperidolIV vs Ondansetron      | 0.411 | 0.139 | 1.213 | 0.240 | 0.422 | 0.148 | 1.204 | 0.214 | 0.428 | 0.149 | 1.229 | 0.218 |
| Granisetron+DroperidolIV vs Ondansetron     | 0.456 | 0.151 | 1.380 | 0.240 | 0.467 | 0.157 | 1.391 | 0.214 | 0.471 | 0.158 | 1.403 | 0.218 |
| Dolasetron vs Granisetron                   | 1.676 | 1.057 | 2.659 | 0.240 | 1.705 | 1.074 | 2.706 | 0.214 | 1.731 | 1.077 | 2.783 | 0.218 |
| Tropisetron vs Granisetron                  | 1.378 | 0.893 | 2.126 | 0.240 | 1.415 | 0.906 | 2.211 | 0.214 | 1.301 | 0.837 | 2.023 | 0.218 |
| Ondansetron+Dexamethasone vs Granisetron    | 0.668 | 0.420 | 1.064 | 0.240 | 0.787 | 0.488 | 1.270 | 0.214 | 0.789 | 0.491 | 1.269 | 0.218 |
| Palonosetron vs Granisetron                 | 0.865 | 0.456 | 1.641 | 0.240 | 0.857 | 0.459 | 1.600 | 0.214 | 0.866 | 0.464 | 1.616 | 0.218 |
| Ramosetron vs Granisetron                   | 0.912 | 0.559 | 1.488 | 0.240 | 0.889 | 0.549 | 1.438 | 0.214 | 0.985 | 0.599 | 1.618 | 0.218 |
| Ondansetron+DroperidolIV vs Granisetron     | 0.727 | 0.359 | 1.472 | 0.240 | 0.735 | 0.368 | 1.469 | 0.214 | 0.686 | 0.331 | 1.421 | 0.218 |
| Ondansetron+MetoclopramideIV vs Granisetron | 0.874 | 0.186 | 4.101 | 0.240 | 0.852 | 0.184 | 3.938 | 0.214 | 0.861 | 0.186 | 3.979 | 0.218 |
| Granisetron+Dexamethasone vs Granisetron    | 0.554 | 0.322 | 0.952 | 0.240 | 0.560 | 0.329 | 0.951 | 0.214 | 0.563 | 0.331 | 0.958 | 0.218 |
| Palonosetron+Dexamethasone vs Granisetron   | 1.042 | 0.325 | 3.342 | 0.240 | 1.029 | 0.331 | 3.195 | 0.214 | 1.041 | 0.334 | 3.239 | 0.218 |
| Dolasetron+Dexamethasone vs Granisetron     | 0.590 | 0.191 | 1.827 | 0.240 | 0.597 | 0.197 | 1.806 | 0.214 | 0.606 | 0.199 | 1.845 | 0.218 |
| Dolasetron+DroperidolIV vs Granisetron      | 0.542 | 0.177 | 1.660 | 0.240 | 0.540 | 0.182 | 1.599 | 0.214 | 0.549 | 0.185 | 1.632 | 0.218 |
| Granisetron+DroperidolIV vs Granisetron     | 0.602 | 0.199 | 1.822 | 0.240 | 0.597 | 0.200 | 1.780 | 0.214 | 0.603 | 0.202 | 1.800 | 0.218 |
| Tropisetron vs Dolasetron                   | 0.822 | 0.519 | 1.301 | 0.240 | 0.830 | 0.521 | 1.323 | 0.214 | 0.752 | 0.463 | 1.221 | 0.218 |
| Ondansetron+Dexamethasone vs Dolasetron     | 0.399 | 0.242 | 0.657 | 0.240 | 0.462 | 0.276 | 0.771 | 0.214 | 0.456 | 0.268 | 0.775 | 0.218 |
| Palonosetron vs Dolasetron                  | 0.516 | 0.262 | 1.016 | 0.240 | 0.502 | 0.259 | 0.974 | 0.214 | 0.500 | 0.254 | 0.984 | 0.218 |

|                                                       |       |       |       |       |       |       |       |       |       |       |       |       |
|-------------------------------------------------------|-------|-------|-------|-------|-------|-------|-------|-------|-------|-------|-------|-------|
| Ramosetron vs Dolasetron                              | 0.544 | 0.321 | 0.922 | 0.240 | 0.521 | 0.311 | 0.875 | 0.214 | 0.569 | 0.327 | 0.990 | 0.218 |
| Ondansetron+DroperidolIV vs Dolasetron                | 0.434 | 0.210 | 0.897 | 0.240 | 0.431 | 0.211 | 0.880 | 0.214 | 0.397 | 0.185 | 0.850 | 0.218 |
| Ondansetron+MetoclopramideIV vs Dolasetron            | 0.522 | 0.110 | 2.470 | 0.240 | 0.500 | 0.107 | 2.330 | 0.214 | 0.497 | 0.106 | 2.336 | 0.218 |
| Granisetron+Dexamethasone vs Dolasetron               | 0.330 | 0.172 | 0.633 | 0.240 | 0.328 | 0.173 | 0.623 | 0.214 | 0.325 | 0.169 | 0.626 | 0.218 |
| Palonosetron+Dexamethasone vs Dolasetron              | 0.621 | 0.190 | 2.036 | 0.240 | 0.604 | 0.190 | 1.913 | 0.214 | 0.601 | 0.187 | 1.928 | 0.218 |
| Dolasetron+Dexamethasone vs Dolasetron                | 0.352 | 0.123 | 1.007 | 0.240 | 0.350 | 0.126 | 0.976 | 0.214 | 0.350 | 0.125 | 0.980 | 0.218 |
| Dolasetron+DroperidolIV vs Dolasetron                 | 0.323 | 0.110 | 0.950 | 0.240 | 0.317 | 0.112 | 0.898 | 0.214 | 0.317 | 0.111 | 0.906 | 0.218 |
| Granisetron+DroperidolIV vs Dolasetron                | 0.359 | 0.113 | 1.140 | 0.240 | 0.350 | 0.112 | 1.095 | 0.214 | 0.349 | 0.111 | 1.099 | 0.218 |
| Ondansetron+Dexamethasone vs Tropisetron              | 0.485 | 0.301 | 0.782 | 0.240 | 0.556 | 0.337 | 0.917 | 0.214 | 0.607 | 0.367 | 1.002 | 0.218 |
| Palonosetron vs Tropisetron                           | 0.628 | 0.324 | 1.214 | 0.240 | 0.605 | 0.316 | 1.160 | 0.214 | 0.665 | 0.346 | 1.279 | 0.218 |
| Ramosetron vs Tropisetron                             | 0.662 | 0.399 | 1.098 | 0.240 | 0.628 | 0.379 | 1.041 | 0.214 | 0.757 | 0.447 | 1.282 | 0.218 |
| Ondansetron+DroperidolIV vs Tropisetron               | 0.528 | 0.259 | 1.075 | 0.240 | 0.519 | 0.257 | 1.051 | 0.214 | 0.527 | 0.251 | 1.109 | 0.218 |
| Ondansetron+MetoclopramideIV vs Tropisetron           | 0.635 | 0.135 | 2.983 | 0.240 | 0.602 | 0.130 | 2.796 | 0.214 | 0.661 | 0.142 | 3.078 | 0.218 |
| Granisetron+Dexamethasone vs Tropisetron              | 0.402 | 0.214 | 0.755 | 0.240 | 0.395 | 0.211 | 0.741 | 0.214 | 0.433 | 0.231 | 0.813 | 0.218 |
| Palonosetron+Dexamethasone vs Tropisetron             | 0.756 | 0.233 | 2.451 | 0.240 | 0.727 | 0.231 | 2.290 | 0.214 | 0.800 | 0.253 | 2.531 | 0.218 |
| Dolasetron+Dexamethasone vs Tropisetron               | 0.428 | 0.138 | 1.325 | 0.240 | 0.422 | 0.139 | 1.279 | 0.214 | 0.466 | 0.152 | 1.425 | 0.218 |
| Dolasetron+DroperidolIV vs Tropisetron                | 0.393 | 0.128 | 1.206 | 0.240 | 0.381 | 0.128 | 1.134 | 0.214 | 0.422 | 0.141 | 1.263 | 0.218 |
| Granisetron+DroperidolIV vs Tropisetron               | 0.437 | 0.139 | 1.372 | 0.240 | 0.422 | 0.136 | 1.310 | 0.214 | 0.464 | 0.149 | 1.443 | 0.218 |
| Palonosetron vs Ondansetron+Dexamethasone             | 1.294 | 0.652 | 2.567 | 0.240 | 1.088 | 0.553 | 2.140 | 0.214 | 1.097 | 0.556 | 2.163 | 0.218 |
| Ramosetron vs Ondansetron+Dexamethasone               | 1.365 | 0.801 | 2.326 | 0.240 | 1.129 | 0.661 | 1.929 | 0.214 | 1.247 | 0.715 | 2.177 | 0.218 |
| Ondansetron+DroperidolIV vs Ondansetron+Dexamethasone | 1.088 | 0.541 | 2.186 | 0.240 | 0.934 | 0.469 | 1.859 | 0.214 | 0.869 | 0.422 | 1.793 | 0.218 |

|                                                           |       |       |       |       |       |       |       |       |       |       |       |       |
|-----------------------------------------------------------|-------|-------|-------|-------|-------|-------|-------|-------|-------|-------|-------|-------|
| Ondansetron+MetoclopramideIV vs Ondansetron+Dexamethasone | 1.308 | 0.276 | 6.208 | 0.240 | 1.082 | 0.231 | 5.080 | 0.214 | 1.090 | 0.232 | 5.128 | 0.218 |
| Granisetron+Dexamethasone vs Ondansetron+Dexamethasone    | 0.828 | 0.440 | 1.558 | 0.240 | 0.711 | 0.379 | 1.335 | 0.214 | 0.714 | 0.380 | 1.341 | 0.218 |
| Palonosetron+Dexamethasone vs Ondansetron+Dexamethasone   | 1.559 | 0.474 | 5.125 | 0.240 | 1.307 | 0.409 | 4.179 | 0.214 | 1.318 | 0.410 | 4.234 | 0.218 |
| Dolasetron+Dexamethasone vs Ondansetron+Dexamethasone     | 0.883 | 0.281 | 2.779 | 0.240 | 0.758 | 0.245 | 2.346 | 0.214 | 0.768 | 0.246 | 2.396 | 0.218 |
| Dolasetron+DroperidolIV vs Ondansetron+Dexamethasone      | 0.811 | 0.260 | 2.526 | 0.240 | 0.686 | 0.226 | 2.080 | 0.214 | 0.695 | 0.228 | 2.122 | 0.218 |
| Granisetron+DroperidolIV vs Ondansetron+Dexamethasone     | 0.901 | 0.284 | 2.857 | 0.240 | 0.759 | 0.242 | 2.383 | 0.214 | 0.764 | 0.243 | 2.406 | 0.218 |
| Ramosetron vs Palonosetron                                | 1.055 | 0.522 | 2.131 | 0.240 | 1.038 | 0.525 | 2.050 | 0.214 | 1.137 | 0.566 | 2.285 | 0.218 |
| Ondansetron+DroperidolIV vs Palonosetron                  | 0.841 | 0.355 | 1.993 | 0.240 | 0.858 | 0.371 | 1.985 | 0.214 | 0.793 | 0.331 | 1.897 | 0.218 |
| Ondansetron+MetoclopramideIV vs Palonosetron              | 1.011 | 0.199 | 5.126 | 0.240 | 0.995 | 0.200 | 4.937 | 0.214 | 0.994 | 0.200 | 4.947 | 0.218 |
| Granisetron+Dexamethasone vs Palonosetron                 | 0.640 | 0.290 | 1.415 | 0.240 | 0.653 | 0.302 | 1.414 | 0.214 | 0.651 | 0.300 | 1.411 | 0.218 |
| Palonosetron+Dexamethasone vs Palonosetron                | 1.204 | 0.455 | 3.191 | 0.240 | 1.201 | 0.467 | 3.092 | 0.214 | 1.202 | 0.465 | 3.105 | 0.218 |
| Dolasetron+Dexamethasone vs Palonosetron                  | 0.683 | 0.199 | 2.345 | 0.240 | 0.697 | 0.209 | 2.323 | 0.214 | 0.700 | 0.208 | 2.355 | 0.218 |
| Dolasetron+DroperidolIV vs Palonosetron                   | 0.626 | 0.184 | 2.132 | 0.240 | 0.630 | 0.193 | 2.061 | 0.214 | 0.634 | 0.192 | 2.087 | 0.218 |
| Granisetron+DroperidolIV vs Palonosetron                  | 0.696 | 0.201 | 2.411 | 0.240 | 0.697 | 0.206 | 2.360 | 0.214 | 0.697 | 0.205 | 2.365 | 0.218 |
| Ondansetron+DroperidolIV vs Ramosetron                    | 0.797 | 0.377 | 1.685 | 0.240 | 0.827 | 0.399 | 1.714 | 0.214 | 0.697 | 0.319 | 1.522 | 0.218 |
| Ondansetron+MetoclopramideIV vs Ramosetron                | 0.958 | 0.200 | 4.587 | 0.240 | 0.958 | 0.204 | 4.506 | 0.214 | 0.874 | 0.184 | 4.146 | 0.218 |
| Granisetron+Dexamethasone vs Ramosetron                   | 0.607 | 0.309 | 1.190 | 0.240 | 0.630 | 0.326 | 1.215 | 0.214 | 0.572 | 0.292 | 1.122 | 0.218 |
| Palonosetron+Dexamethasone vs Ramosetron                  | 1.142 | 0.344 | 3.795 | 0.240 | 1.157 | 0.361 | 3.710 | 0.214 | 1.057 | 0.325 | 3.432 | 0.218 |
| Dolasetron+Dexamethasone vs Ramosetron                    | 0.647 | 0.203 | 2.060 | 0.240 | 0.672 | 0.217 | 2.082 | 0.214 | 0.616 | 0.195 | 1.942 | 0.218 |



|                                                            |       |       |       |       |       |       |       |       |       |       |       |       |
|------------------------------------------------------------|-------|-------|-------|-------|-------|-------|-------|-------|-------|-------|-------|-------|
| Dolasetron+DroperidolIV vs Ramosetron                      | 0.594 | 0.188 | 1.873 | 0.240 | 0.607 | 0.200 | 1.846 | 0.214 | 0.557 | 0.181 | 1.720 | 0.218 |
| Granisetron+DroperidolIV vs Ramosetron                     | 0.660 | 0.205 | 2.124 | 0.240 | 0.672 | 0.213 | 2.122 | 0.214 | 0.613 | 0.192 | 1.956 | 0.218 |
| Ondansetron+MetoclopramideIV vs Ondansetron+DroperidolIV   | 1.203 | 0.232 | 6.222 | 0.240 | 1.159 | 0.229 | 5.879 | 0.214 | 1.254 | 0.243 | 6.479 | 0.218 |
| Granisetron+Dexamethasone vs Ondansetron+DroperidolIV      | 0.761 | 0.329 | 1.761 | 0.240 | 0.762 | 0.336 | 1.729 | 0.214 | 0.821 | 0.350 | 1.925 | 0.218 |
| Palonosetron+Dexamethasone vs Ondansetron+DroperidolIV     | 1.433 | 0.390 | 5.263 | 0.240 | 1.400 | 0.396 | 4.955 | 0.214 | 1.516 | 0.418 | 5.503 | 0.218 |
| Dolasetron+Dexamethasone vs Ondansetron+DroperidolIV       | 0.812 | 0.230 | 2.867 | 0.240 | 0.812 | 0.237 | 2.789 | 0.214 | 0.883 | 0.250 | 3.124 | 0.218 |
| Dolasetron+DroperidolIV vs Ondansetron+DroperidolIV        | 0.745 | 0.213 | 2.609 | 0.240 | 0.735 | 0.218 | 2.477 | 0.214 | 0.800 | 0.231 | 2.773 | 0.218 |
| Granisetron+DroperidolIV vs Ondansetron+DroperidolIV       | 0.828 | 0.232 | 2.956 | 0.240 | 0.813 | 0.233 | 2.841 | 0.214 | 0.879 | 0.246 | 3.145 | 0.218 |
| Granisetron+Dexamethasone vs Ondansetron+MetoclopramideIV  | 0.633 | 0.126 | 3.174 | 0.240 | 0.657 | 0.133 | 3.234 | 0.214 | 0.655 | 0.133 | 3.229 | 0.218 |
| Palonosetron+Dexamethasone vs Ondansetron+MetoclopramideIV | 1.191 | 0.179 | 7.909 | 0.240 | 1.208 | 0.188 | 7.761 | 0.214 | 1.209 | 0.187 | 7.803 | 0.218 |
| Dolasetron+Dexamethasone vs Ondansetron+MetoclopramideIV   | 0.675 | 0.104 | 4.362 | 0.240 | 0.701 | 0.111 | 4.410 | 0.214 | 0.705 | 0.111 | 4.463 | 0.218 |
| Dolasetron+DroperidolIV vs Ondansetron+MetoclopramideIV    | 0.620 | 0.096 | 3.980 | 0.240 | 0.634 | 0.102 | 3.939 | 0.214 | 0.638 | 0.102 | 3.986 | 0.218 |
| Granisetron+DroperidolIV vs Ondansetron+MetoclopramideIV   | 0.688 | 0.106 | 4.484 | 0.240 | 0.701 | 0.110 | 4.468 | 0.214 | 0.701 | 0.110 | 4.479 | 0.218 |
| Palonosetron+Dexamethasone vs Granisetron+Dexamethasone    | 1.882 | 0.536 | 6.608 | 0.240 | 1.838 | 0.543 | 6.228 | 0.214 | 1.847 | 0.543 | 6.284 | 0.218 |
| Dolasetron+Dexamethasone vs Granisetron+Dexamethasone      | 1.066 | 0.315 | 3.608 | 0.240 | 1.067 | 0.324 | 3.514 | 0.214 | 1.076 | 0.324 | 3.573 | 0.218 |
| Dolasetron+DroperidolIV vs Granisetron+Dexamethasone       | 0.979 | 0.292 | 3.280 | 0.240 | 0.965 | 0.299 | 3.116 | 0.214 | 0.974 | 0.300 | 3.166 | 0.218 |
| Granisetron+DroperidolIV vs Granisetron+Dexamethasone      | 1.088 | 0.346 | 3.422 | 0.240 | 1.067 | 0.345 | 3.300 | 0.214 | 1.071 | 0.346 | 3.319 | 0.218 |
| Dolasetron+Dexamethasone vs Palonosetron+Dexamethasone     | 0.567 | 0.118 | 2.729 | 0.240 | 0.580 | 0.126 | 2.681 | 0.214 | 0.583 | 0.125 | 2.717 | 0.218 |
| Dolasetron+DroperidolIV vs Palonosetron+Dexamethasone      | 0.520 | 0.109 | 2.487 | 0.240 | 0.525 | 0.115 | 2.388 | 0.214 | 0.527 | 0.115 | 2.420 | 0.218 |

|                                                                                                                    |                                 |       |       |       |                                 |       |       |       |                                 |       |       |       |
|--------------------------------------------------------------------------------------------------------------------|---------------------------------|-------|-------|-------|---------------------------------|-------|-------|-------|---------------------------------|-------|-------|-------|
| Granisetron+DroperidolIV vs Palonosetron+Dexamethasone                                                             | 0.578                           | 0.119 | 2.802 | 0.240 | 0.581                           | 0.124 | 2.715 | 0.214 | 0.580                           | 0.123 | 2.724 | 0.218 |
| Dolasetron+DroperidolIV vs Dolasetron+Dexamethasone                                                                | 0.918                           | 0.205 | 4.108 | 0.240 | 0.904                           | 0.211 | 3.877 | 0.214 | 0.905                           | 0.210 | 3.906 | 0.218 |
| Granisetron+DroperidolIV vs Dolasetron+Dexamethasone                                                               | 1.020                           | 0.217 | 4.796 | 0.240 | 1.001                           | 0.219 | 4.574 | 0.214 | 0.995                           | 0.216 | 4.583 | 0.218 |
| Granisetron+DroperidolIV vs Dolasetron+DroperidolIV                                                                | 1.111                           | 0.238 | 5.188 | 0.240 | 1.107                           | 0.246 | 4.981 | 0.214 | 1.099                           | 0.243 | 4.978 | 0.218 |
| <b>Design-by-treatment interaction model for inconsistency (<math>\chi^2</math>, d.f., P-value, heterogeneity)</b> | <b>26.65 (41, 0.959, 0.271)</b> |       |       |       | <b>22.61 (37, 0.970, 0.260)</b> |       |       |       | <b>24.38 (41, 0.982, 0.271)</b> |       |       |       |

Appendix 19. PONV network meta-analysis results forest plot versus placebo\*

**Treatment vs Placebo**

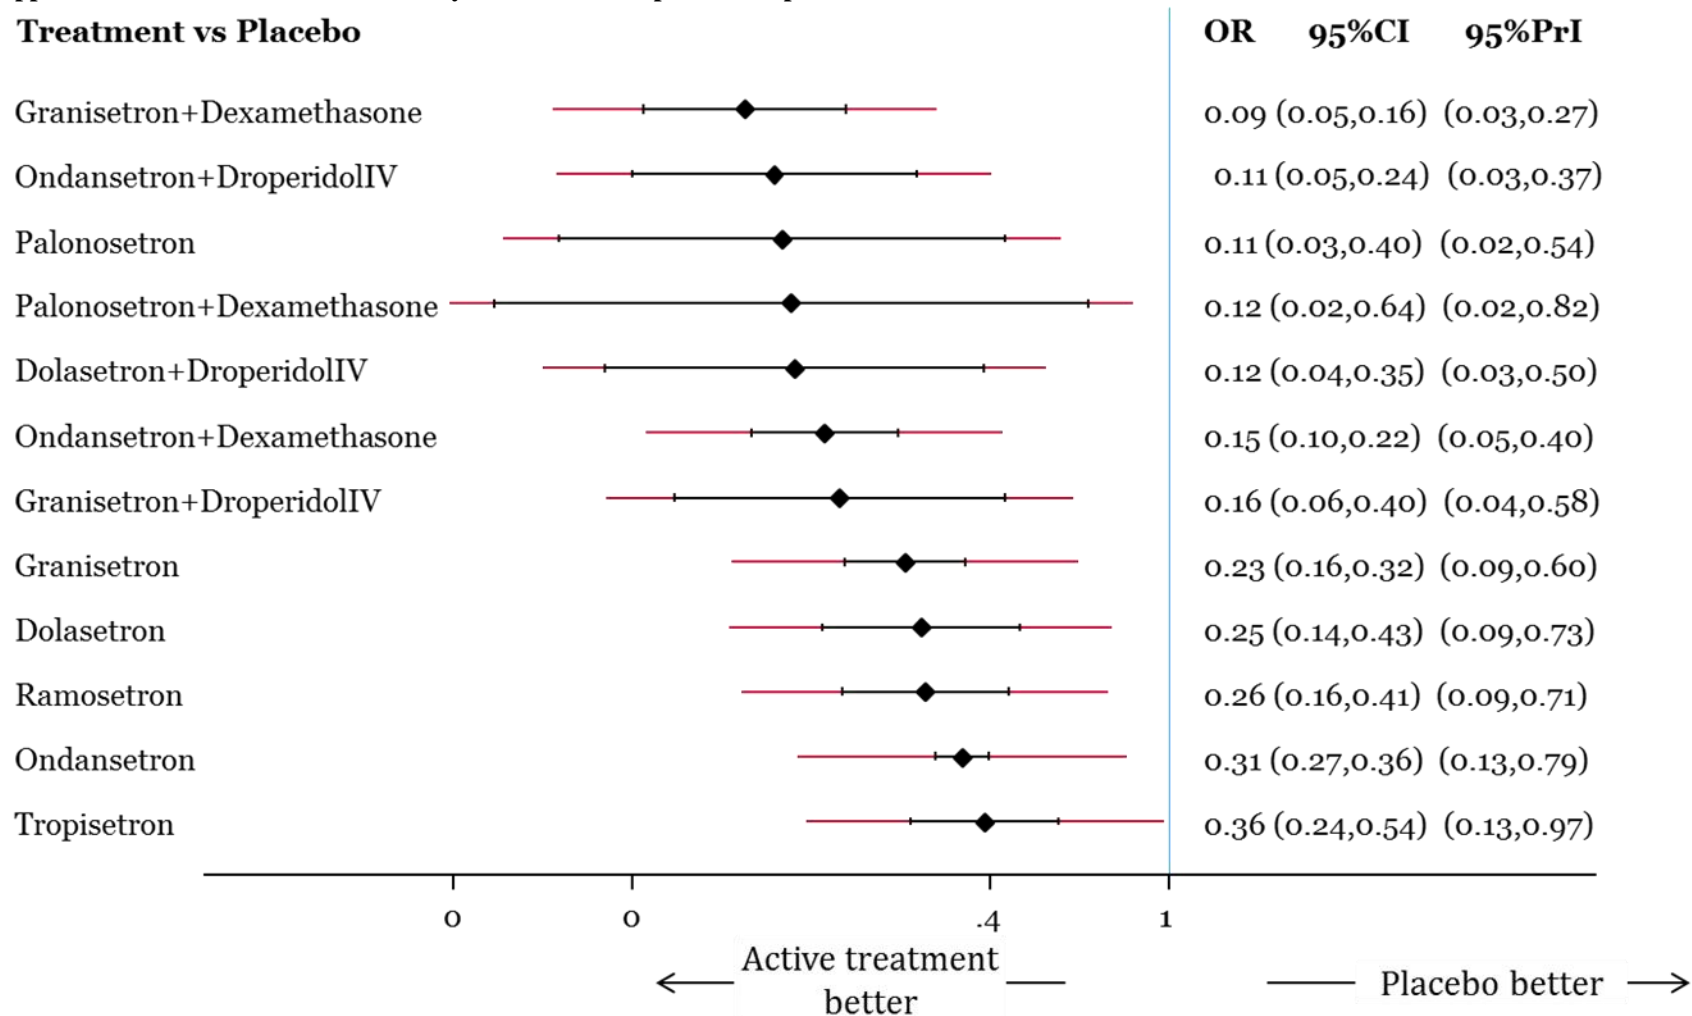

Network Estimates using the random effects model and a common within-network heterogeneity

\*Note: All treatments are compared to placebo. The black horizontal lines represent the 95% confidence intervals (CI) of the summary treatment effects and red horizontal lines the 95% predictive intervals (PrI). The results are presented on the odds ratio scale.

Appendix 20. Plot of the surface under the cumulative ranking (SUCRA) curves for the 13 treatments included in PONV.

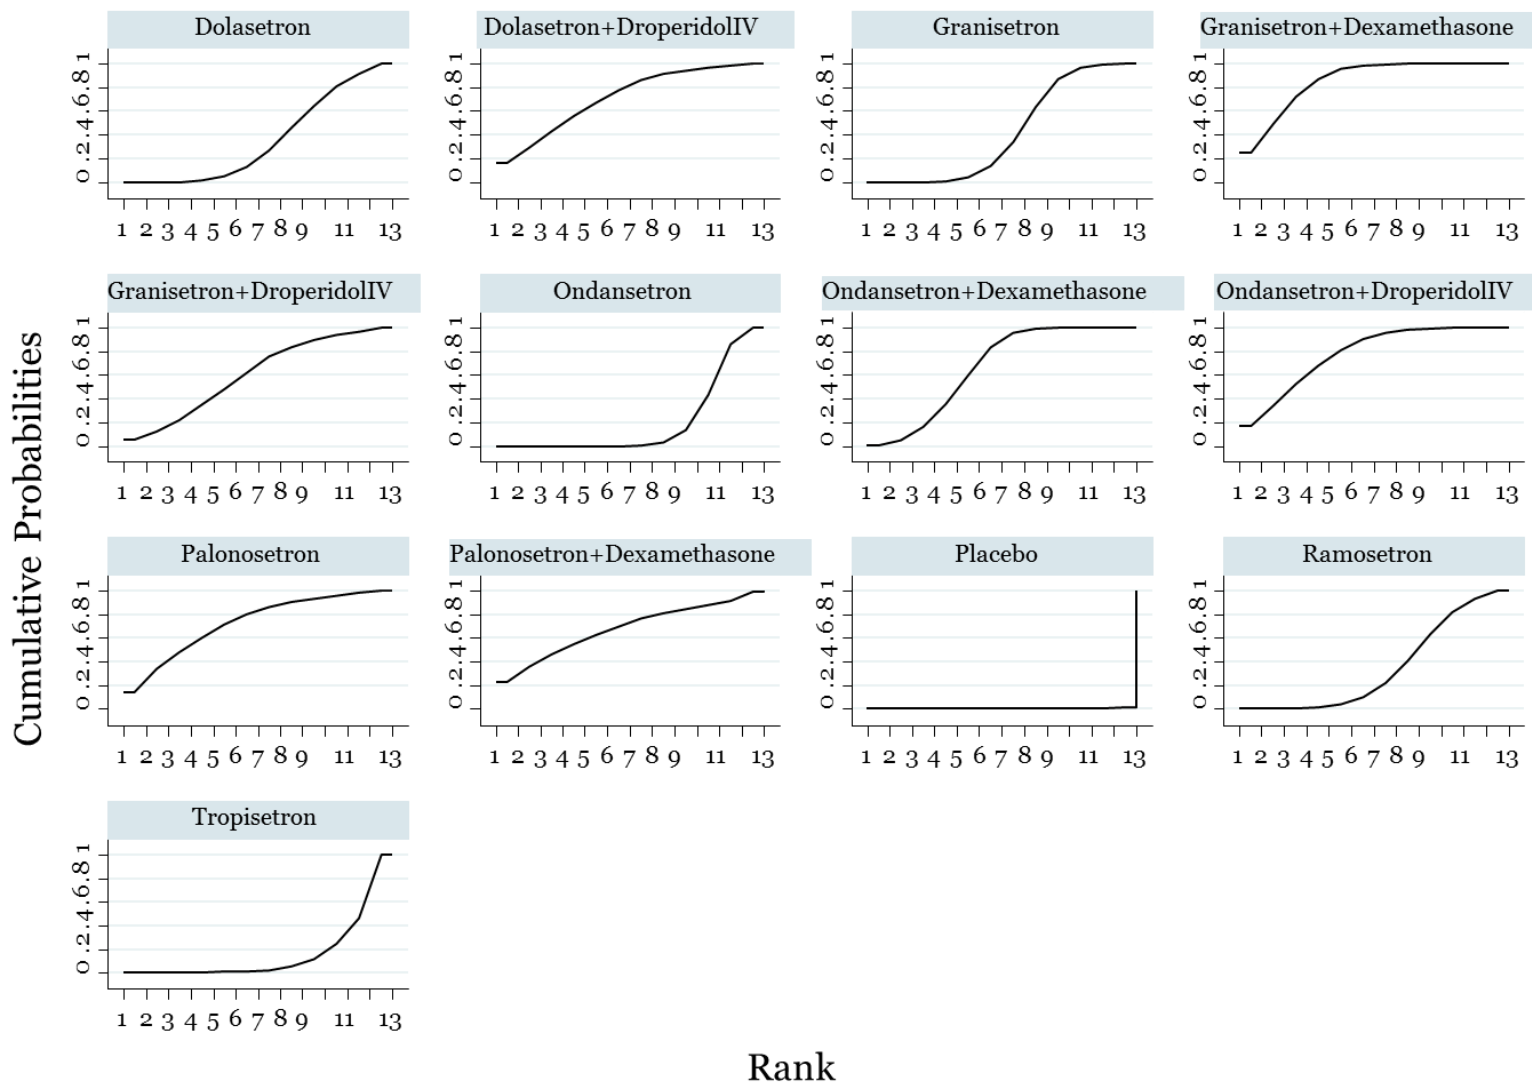

## Appendix 21. PONV sub-group analysis results

| PONV                                     | <i>All time periods - all study designs</i> |        |         |               | <i>All time periods - RCTs only - sensitivity analysis for Risk of Bias</i> |        |         |               | <i>Intra-operative - RCTs only</i> |        |         |               |
|------------------------------------------|---------------------------------------------|--------|---------|---------------|-----------------------------------------------------------------------------|--------|---------|---------------|------------------------------------|--------|---------|---------------|
|                                          | OR                                          | CI_Low | CI_High | Heterogeneity | OR                                                                          | CI_Low | CI_High | Heterogeneity | OR                                 | CI_Low | CI_High | Heterogeneity |
| Ondansetron vs Placebo                   | 0.321                                       | 0.277  | 0.372   | 0.250         | 0.311                                                                       | 0.266  | 0.363   | 0.254         | 0.310                              | 0.265  | 0.362   | 0.226         |
| Granisetron vs Placebo                   | 0.229                                       | 0.162  | 0.324   | 0.250         | 0.222                                                                       | 0.156  | 0.317   | 0.254         | 0.240                              | 0.169  | 0.340   | 0.226         |
| Dolasetron vs Placebo                    | 0.246                                       | 0.144  | 0.421   | 0.250         | 0.242                                                                       | 0.134  | 0.436   | 0.254         | 0.248                              | 0.141  | 0.436   | 0.226         |
| Tropisetron vs Placebo                   | 0.359                                       | 0.233  | 0.554   | 0.250         | 0.398                                                                       | 0.249  | 0.633   | 0.254         | 0.349                              | 0.222  | 0.550   | 0.226         |
| Ondansetron+Dexamethasone vs Placebo     | 0.160                                       | 0.108  | 0.236   | 0.250         | 0.157                                                                       | 0.106  | 0.232   | 0.254         | 0.148                              | 0.097  | 0.228   | 0.226         |
| Palonosetron vs Placebo                  | 0.117                                       | 0.032  | 0.435   | 0.250         | 0.114                                                                       | 0.030  | 0.424   | 0.254         | 0.113                              | 0.032  | 0.405   | 0.226         |
| Ramosetron vs Placebo                    | 0.259                                       | 0.158  | 0.423   | 0.250         | 0.254                                                                       | 0.155  | 0.417   | 0.254         | 0.300                              | 0.184  | 0.488   | 0.226         |
| Ondansetron+DroperidolIV vs Placebo      | 0.114                                       | 0.050  | 0.260   | 0.250         | 0.112                                                                       | 0.049  | 0.256   | 0.254         | 0.110                              | 0.049  | 0.247   | 0.226         |
| Granisetron+Dexamethasone vs Placebo     | 0.092                                       | 0.051  | 0.166   | 0.250         | 0.090                                                                       | 0.050  | 0.163   | 0.254         | 0.100                              | 0.054  | 0.184   | 0.226         |
| Palonosetron+Dexamethasone vs Placebo    | 0.125                                       | 0.022  | 0.714   | 0.250         | 0.121                                                                       | 0.021  | 0.698   | 0.254         | 0.120                              | 0.022  | 0.652   | 0.226         |
| Dolasetron+DroperidolIV vs Placebo       | 0.122                                       | 0.040  | 0.371   | 0.250         | 0.121                                                                       | 0.040  | 0.372   | 0.254         | 0.123                              | 0.042  | 0.362   | 0.226         |
| Granisetron+DroperidolIV vs Placebo      | 0.158                                       | 0.061  | 0.409   | 0.250         | 0.155                                                                       | 0.060  | 0.404   | 0.254         | 0.165                              | 0.064  | 0.420   | 0.226         |
| Granisetron vs Ondansetron               | 0.713                                       | 0.498  | 1.020   | 0.250         | 0.715                                                                       | 0.495  | 1.031   | 0.254         | 0.774                              | 0.537  | 1.114   | 0.226         |
| Dolasetron vs Ondansetron                | 0.767                                       | 0.446  | 1.318   | 0.250         | 0.778                                                                       | 0.430  | 1.410   | 0.254         | 0.801                              | 0.452  | 1.419   | 0.226         |
| Tropisetron vs Ondansetron               | 1.119                                       | 0.714  | 1.753   | 0.250         | 1.279                                                                       | 0.785  | 2.083   | 0.254         | 1.128                              | 0.705  | 1.804   | 0.226         |
| Ondansetron+Dexamethasone vs Ondansetron | 0.498                                       | 0.338  | 0.734   | 0.250         | 0.505                                                                       | 0.342  | 0.745   | 0.254         | 0.480                              | 0.315  | 0.730   | 0.226         |
| Palonosetron vs Ondansetron              | 0.365                                       | 0.099  | 1.343   | 0.250         | 0.365                                                                       | 0.099  | 1.351   | 0.254         | 0.365                              | 0.103  | 1.296   | 0.226         |
| Ramosetron vs Ondansetron                | 0.806                                       | 0.493  | 1.318   | 0.250         | 0.818                                                                       | 0.499  | 1.341   | 0.254         | 0.969                              | 0.593  | 1.583   | 0.226         |
| Ondansetron+DroperidolIV vs Ondansetron  | 0.355                                       | 0.156  | 0.807   | 0.250         | 0.359                                                                       | 0.157  | 0.819   | 0.254         | 0.355                              | 0.159  | 0.793   | 0.226         |

|                                           |       |       |       |       |       |       |       |       |       |       |       |       |
|-------------------------------------------|-------|-------|-------|-------|-------|-------|-------|-------|-------|-------|-------|-------|
| Granisetron+Dexamethasone vs Ondansetron  | 0.288 | 0.159 | 0.523 | 0.250 | 0.291 | 0.160 | 0.530 | 0.254 | 0.324 | 0.174 | 0.602 | 0.226 |
| Palonosetron+Dexamethasone vs Ondansetron | 0.389 | 0.069 | 2.210 | 0.250 | 0.390 | 0.068 | 2.229 | 0.254 | 0.387 | 0.072 | 2.092 | 0.226 |
| Dolasetron+DroperidolIV vs Ondansetron    | 0.381 | 0.125 | 1.162 | 0.250 | 0.390 | 0.126 | 1.204 | 0.254 | 0.397 | 0.133 | 1.178 | 0.226 |
| Granisetron+DroperidolIV vs Ondansetron   | 0.492 | 0.189 | 1.285 | 0.250 | 0.500 | 0.191 | 1.310 | 0.254 | 0.532 | 0.206 | 1.369 | 0.226 |
| Dolasetron vs Granisetron                 | 1.075 | 0.570 | 2.030 | 0.250 | 1.089 | 0.550 | 2.157 | 0.254 | 1.035 | 0.535 | 2.003 | 0.226 |
| Tropisetron vs Granisetron                | 1.570 | 0.912 | 2.702 | 0.250 | 1.789 | 1.007 | 3.179 | 0.254 | 1.457 | 0.832 | 2.554 | 0.226 |
| Ondansetron+Dexamethasone vs Granisetron  | 0.699 | 0.420 | 1.162 | 0.250 | 0.706 | 0.422 | 1.181 | 0.254 | 0.620 | 0.359 | 1.068 | 0.226 |
| Palonosetron vs Granisetron               | 0.513 | 0.133 | 1.978 | 0.250 | 0.511 | 0.132 | 1.988 | 0.254 | 0.472 | 0.127 | 1.763 | 0.226 |
| Ramosetron vs Granisetron                 | 1.130 | 0.633 | 2.018 | 0.250 | 1.144 | 0.637 | 2.055 | 0.254 | 1.252 | 0.703 | 2.229 | 0.226 |
| Ondansetron+DroperidolIV vs Granisetron   | 0.498 | 0.204 | 1.212 | 0.250 | 0.502 | 0.205 | 1.230 | 0.254 | 0.458 | 0.191 | 1.101 | 0.226 |
| Granisetron+Dexamethasone vs Granisetron  | 0.404 | 0.235 | 0.696 | 0.250 | 0.407 | 0.236 | 0.702 | 0.254 | 0.418 | 0.240 | 0.729 | 0.226 |
| Palonosetron+Dexamethasone vs Granisetron | 0.546 | 0.093 | 3.216 | 0.250 | 0.545 | 0.092 | 3.241 | 0.254 | 0.500 | 0.089 | 2.812 | 0.226 |
| Dolasetron+DroperidolIV vs Granisetron    | 0.534 | 0.167 | 1.707 | 0.250 | 0.546 | 0.169 | 1.766 | 0.254 | 0.512 | 0.165 | 1.595 | 0.226 |
| Granisetron+DroperidolIV vs Granisetron   | 0.691 | 0.268 | 1.782 | 0.250 | 0.700 | 0.270 | 1.811 | 0.254 | 0.687 | 0.271 | 1.743 | 0.226 |
| Tropisetron vs Dolasetron                 | 1.459 | 0.733 | 2.905 | 0.250 | 1.643 | 0.775 | 3.482 | 0.254 | 1.408 | 0.684 | 2.901 | 0.226 |
| Ondansetron+Dexamethasone vs Dolasetron   | 0.650 | 0.337 | 1.253 | 0.250 | 0.648 | 0.322 | 1.306 | 0.254 | 0.599 | 0.297 | 1.208 | 0.226 |
| Palonosetron vs Dolasetron                | 0.477 | 0.116 | 1.953 | 0.250 | 0.470 | 0.112 | 1.974 | 0.254 | 0.456 | 0.114 | 1.831 | 0.226 |
| Ramosetron vs Dolasetron                  | 1.051 | 0.510 | 2.165 | 0.250 | 1.051 | 0.490 | 2.254 | 0.254 | 1.210 | 0.577 | 2.537 | 0.226 |
| Ondansetron+DroperidolIV vs Dolasetron    | 0.463 | 0.174 | 1.233 | 0.250 | 0.461 | 0.168 | 1.268 | 0.254 | 0.443 | 0.166 | 1.181 | 0.226 |
| Granisetron+Dexamethasone vs Dolasetron   | 0.376 | 0.170 | 0.830 | 0.250 | 0.374 | 0.163 | 0.858 | 0.254 | 0.404 | 0.177 | 0.925 | 0.226 |
| Palonosetron+Dexamethasone vs Dolasetron  | 0.508 | 0.082 | 3.131 | 0.250 | 0.501 | 0.079 | 3.160 | 0.254 | 0.483 | 0.081 | 2.872 | 0.226 |

|                                                         |       |       |       |       |       |       |       |       |       |       |        |       |
|---------------------------------------------------------|-------|-------|-------|-------|-------|-------|-------|-------|-------|-------|--------|-------|
| Dolasetron+DroperidolIV vs Dolasetron                   | 0.497 | 0.164 | 1.509 | 0.250 | 0.501 | 0.163 | 1.539 | 0.254 | 0.495 | 0.168 | 1.462  | 0.226 |
| Granisetron+DroperidolIV vs Dolasetron                  | 0.642 | 0.216 | 1.913 | 0.250 | 0.643 | 0.209 | 1.971 | 0.254 | 0.664 | 0.223 | 1.979  | 0.226 |
| Ondansetron+Dexamethasone vs Tropisetron                | 0.445 | 0.249 | 0.795 | 0.250 | 0.395 | 0.215 | 0.725 | 0.254 | 0.425 | 0.229 | 0.790  | 0.226 |
| Palonosetron vs Tropisetron                             | 0.327 | 0.082 | 1.295 | 0.250 | 0.286 | 0.071 | 1.154 | 0.254 | 0.324 | 0.084 | 1.251  | 0.226 |
| Ramosetron vs Tropisetron                               | 0.720 | 0.375 | 1.382 | 0.250 | 0.639 | 0.325 | 1.259 | 0.254 | 0.859 | 0.443 | 1.665  | 0.226 |
| Ondansetron+DroperidolIV vs Tropisetron                 | 0.317 | 0.125 | 0.804 | 0.250 | 0.281 | 0.109 | 0.726 | 0.254 | 0.314 | 0.125 | 0.792  | 0.226 |
| Granisetron+Dexamethasone vs Tropisetron                | 0.258 | 0.125 | 0.531 | 0.250 | 0.227 | 0.108 | 0.480 | 0.254 | 0.287 | 0.135 | 0.610  | 0.226 |
| Palonosetron+Dexamethasone vs Tropisetron               | 0.348 | 0.058 | 2.091 | 0.250 | 0.305 | 0.050 | 1.863 | 0.254 | 0.343 | 0.060 | 1.978  | 0.226 |
| Dolasetron+DroperidolIV vs Tropisetron                  | 0.340 | 0.104 | 1.120 | 0.250 | 0.305 | 0.091 | 1.027 | 0.254 | 0.352 | 0.109 | 1.135  | 0.226 |
| Granisetron+DroperidolIV vs Tropisetron                 | 0.440 | 0.155 | 1.248 | 0.250 | 0.391 | 0.135 | 1.129 | 0.254 | 0.471 | 0.167 | 1.331  | 0.226 |
| Palonosetron vs Ondansetron+Dexamethasone               | 0.734 | 0.189 | 2.854 | 0.250 | 0.724 | 0.185 | 2.834 | 0.254 | 0.762 | 0.201 | 2.893  | 0.226 |
| Ramosetron vs Ondansetron+Dexamethasone                 | 1.618 | 0.872 | 3.001 | 0.250 | 1.620 | 0.871 | 3.014 | 0.254 | 2.020 | 1.067 | 3.824  | 0.226 |
| Ondansetron+DroperidolIV vs Ondansetron+Dexamethasone   | 0.712 | 0.300 | 1.693 | 0.250 | 0.711 | 0.298 | 1.695 | 0.254 | 0.739 | 0.314 | 1.741  | 0.226 |
| Granisetron+Dexamethasone vs Ondansetron+Dexamethasone  | 0.578 | 0.290 | 1.155 | 0.250 | 0.576 | 0.287 | 1.155 | 0.254 | 0.675 | 0.322 | 1.414  | 0.226 |
| Palonosetron+Dexamethasone vs Ondansetron+Dexamethasone | 0.782 | 0.132 | 4.633 | 0.250 | 0.772 | 0.129 | 4.613 | 0.254 | 0.807 | 0.142 | 4.596  | 0.226 |
| Dolasetron+DroperidolIV vs Ondansetron+Dexamethasone    | 0.765 | 0.236 | 2.474 | 0.250 | 0.773 | 0.236 | 2.529 | 0.254 | 0.827 | 0.259 | 2.640  | 0.226 |
| Granisetron+DroperidolIV vs Ondansetron+Dexamethasone   | 0.988 | 0.355 | 2.751 | 0.250 | 0.991 | 0.355 | 2.769 | 0.254 | 1.108 | 0.397 | 3.097  | 0.226 |
| Ramosetron vs Palonosetron                              | 2.205 | 0.548 | 8.867 | 0.250 | 2.238 | 0.553 | 9.055 | 0.254 | 2.651 | 0.682 | 10.305 | 0.226 |
| Ondansetron+DroperidolIV vs Palonosetron                | 0.971 | 0.208 | 4.527 | 0.250 | 0.982 | 0.209 | 4.609 | 0.254 | 0.970 | 0.216 | 4.347  | 0.226 |

|                                                         |       |       |       |       |       |       |       |       |       |       |       |       |
|---------------------------------------------------------|-------|-------|-------|-------|-------|-------|-------|-------|-------|-------|-------|-------|
| Granisetron+Dexamethasone vs Palonosetron               | 0.788 | 0.188 | 3.300 | 0.250 | 0.796 | 0.189 | 3.354 | 0.254 | 0.886 | 0.216 | 3.627 | 0.226 |
| Palonosetron+Dexamethasone vs Palonosetron              | 1.065 | 0.338 | 3.361 | 0.250 | 1.067 | 0.336 | 3.381 | 0.254 | 1.059 | 0.347 | 3.233 | 0.226 |
| Dolasetron+DroperidolIV vs Palonosetron                 | 1.042 | 0.188 | 5.789 | 0.250 | 1.067 | 0.190 | 5.998 | 0.254 | 1.085 | 0.204 | 5.763 | 0.226 |
| Granisetron+DroperidolIV vs Palonosetron                | 1.347 | 0.267 | 6.787 | 0.250 | 1.368 | 0.270 | 6.942 | 0.254 | 1.454 | 0.299 | 7.062 | 0.226 |
| Ondansetron+DroperidolIV vs Ramosetron                  | 0.440 | 0.170 | 1.143 | 0.250 | 0.439 | 0.168 | 1.143 | 0.254 | 0.366 | 0.143 | 0.934 | 0.226 |
| Granisetron+Dexamethasone vs Ramosetron                 | 0.358 | 0.168 | 0.759 | 0.250 | 0.356 | 0.167 | 0.758 | 0.254 | 0.334 | 0.155 | 0.719 | 0.226 |
| Palonosetron+Dexamethasone vs Ramosetron                | 0.483 | 0.080 | 2.937 | 0.250 | 0.477 | 0.078 | 2.919 | 0.254 | 0.399 | 0.069 | 2.316 | 0.226 |
| Dolasetron+DroperidolIV vs Ramosetron                   | 0.473 | 0.141 | 1.588 | 0.250 | 0.477 | 0.140 | 1.621 | 0.254 | 0.409 | 0.125 | 1.337 | 0.226 |
| Granisetron+DroperidolIV vs Ramosetron                  | 0.611 | 0.211 | 1.772 | 0.250 | 0.611 | 0.210 | 1.780 | 0.254 | 0.549 | 0.192 | 1.566 | 0.226 |
| Granisetron+Dexamethasone vs Ondansetron+DroperidolIV   | 0.812 | 0.296 | 2.225 | 0.250 | 0.810 | 0.294 | 2.231 | 0.254 | 0.913 | 0.333 | 2.506 | 0.226 |
| Palonosetron+Dexamethasone vs Ondansetron+DroperidolIV  | 1.097 | 0.161 | 7.493 | 0.250 | 1.086 | 0.158 | 7.475 | 0.254 | 1.091 | 0.168 | 7.079 | 0.226 |
| Dolasetron+DroperidolIV vs Ondansetron+DroperidolIV     | 1.074 | 0.270 | 4.272 | 0.250 | 1.087 | 0.270 | 4.372 | 0.254 | 1.119 | 0.290 | 4.309 | 0.226 |
| Granisetron+DroperidolIV vs Ondansetron+DroperidolIV    | 1.388 | 0.395 | 4.880 | 0.250 | 1.393 | 0.394 | 4.923 | 0.254 | 1.499 | 0.436 | 5.160 | 0.226 |
| Palonosetron+Dexamethasone vs Granisetron+Dexamethasone | 1.352 | 0.216 | 8.476 | 0.250 | 1.340 | 0.212 | 8.478 | 0.254 | 1.196 | 0.198 | 7.224 | 0.226 |
| Dolasetron+DroperidolIV vs Granisetron+Dexamethasone    | 1.322 | 0.377 | 4.634 | 0.250 | 1.341 | 0.378 | 4.757 | 0.254 | 1.225 | 0.354 | 4.236 | 0.226 |
| Granisetron+DroperidolIV vs Granisetron+Dexamethasone   | 1.709 | 0.631 | 4.626 | 0.250 | 1.719 | 0.633 | 4.669 | 0.254 | 1.642 | 0.613 | 4.400 | 0.226 |
| Dolasetron+DroperidolIV vs Palonosetron+Dexamethasone   | 0.978 | 0.124 | 7.704 | 0.250 | 1.001 | 0.125 | 7.981 | 0.254 | 1.025 | 0.138 | 7.638 | 0.226 |



|                                                                                                                                 |                                 |       |       |       |                                 |       |       |       |                                 |       |       |       |
|---------------------------------------------------------------------------------------------------------------------------------|---------------------------------|-------|-------|-------|---------------------------------|-------|-------|-------|---------------------------------|-------|-------|-------|
| Granisetron+DroperidolIV vs<br>Palonosetron+Dexamethasone                                                                       | 1.264                           | 0.174 | 9.192 | 0.250 | 1.283                           | 0.175 | 9.407 | 0.254 | 1.374                           | 0.198 | 9.511 | 0.226 |
| Granisetron+DroperidolIV vs<br>Dolasetron+DroperidolIV                                                                          | 1.292                           | 0.300 | 5.573 | 0.250 | 1.282                           | 0.294 | 5.587 | 0.254 | 1.340                           | 0.321 | 5.602 | 0.226 |
| <b>Design-by-treatment<br/>interaction model for<br/>inconsistency (<math>\chi^2</math>, d.f., P-<br/>value, heterogeneity)</b> | <b>26.58 (32, 0.737, 0.263)</b> |       |       |       | <b>23.05 (29, 0.774, 0.269)</b> |       |       |       | <b>22.53 (27, 0.710, 0.241)</b> |       |       |       |

## Appendix 22. Included studies in our review versus previous systematic reviews

| Study                                     | Tang, 2012 (NMA) | Carlisle, 2006 (Cochrane) | Rawlinson, 2012 | # of patients |
|-------------------------------------------|------------------|---------------------------|-----------------|---------------|
| <i>Randomized clinical trials (n=429)</i> |                  |                           |                 |               |
| Browning, 2013                            | NO               | NO                        | NO              | 118           |
| Aleyasin, 2012                            | NO               | NO                        | NO              | 120           |
| Blitz, 2012                               | NO               | NO                        | NO              | 118           |
| Choi, 2012                                | NO               | NO                        | NO              | 120           |
| de Orange, 2012                           | NO               | NO                        | NO              | 129           |
| Eidi, 2012                                | NO               | NO                        | NO              | 219           |
| Gurha, 2012 <sup>†</sup>                  | NO               | NO                        | NO              | 90            |
| Koh, 2012                                 | NO               | NO                        | NO              | 119           |
| Lahsaei, 2012                             | NO               | NO                        | NO              | 300           |
| Madenoglu, 2012                           | NO               | NO                        | NO              | 90            |
| Moon, 2012                                | NO               | NO                        | NO              | 100           |
| Park JW, 2012                             | NO               | NO                        | NO              | 84            |
| Wang, 2012                                | NO               | NO                        | NO              | 130           |
| Ahmed, 2011                               | NO               | NO                        | NO              | 80            |
| Apfel, 2011 <sup>†</sup>                  | NO               | NO                        | NO              | 98            |
| Asl, 2011                                 | NO               | NO                        | NO              | 90            |
| Bajwa, 2011                               | NO               | NO                        | NO              | 60            |
| Basu, 2011                                | NO               | NO                        | NO              | 75            |
| Bhattarai, 2011                           | NO               | NO                        | NO              | 100           |
| Bicer, 2011                               | NO               | NO                        | NO              | 150           |
| D'Souza, 2011                             | NO               | NO                        | NO              | 92            |
| Ekinci, 2011                              | NO               | NO                        | NO              | 100           |
| El-deeb, 2011a                            | NO               | NO                        | NO              | 80            |
| El-deeb, 2011b                            | NO               | NO                        | NO              | 160           |
| El-deeb, 2011c                            | NO               | NO                        | NO              | 300           |
| Gan, 2011                                 | NO               | NO                        | NO              | 619           |
| Islam, 2011                               | NO               | NO                        | NO              | 100           |
| Khan, 2011                                | NO               | NO                        | NO              | 60            |
| Lee, 2011                                 | NO               | NO                        | NO              | 120           |
| Metaxari, 2011                            | NO               | NO                        | NO              | 203           |
| Park, 2011                                | NO               | NO                        | NO              | 90            |
| Ryu, 2011                                 | NO               | NO                        | NO              | 124           |
| Safae, 2011                               | NO               | NO                        | NO              | 64            |
| Sahoo, 2011                               | NO               | NO                        | NO              | 52            |
| Singh, 2011                               | NO               | NO                        | NO              | 50            |
| Song, 2011                                | NO               | NO                        | NO              | 123           |
| Srivastava, 2011                          | NO               | NO                        | NO              | 75            |
| Talesh, 2011                              | NO               | NO                        | NO              | 100           |
| Vale, 2011                                | NO               | NO                        | NO              | 40            |
| Akhtar, 2010                              | NO               | NO                        | NO              | 130           |
| Alghanem, 2010                            | NO               | NO                        | NO              | 180           |
| Bhattachajee, 2010                        | NO               | NO                        | NO              | 60            |
| Bilgin, 2010                              | NO               | NO                        | NO              | 160           |

|                                                      |     |    |    |     |
|------------------------------------------------------|-----|----|----|-----|
| Choi, 2010                                           | NO  | NO | NO | 279 |
| Dabbous, 2010                                        | NO  | NO | NO | 84  |
| Ebrahim Soltani, 2010 (CR:<br>Ebrahim Soltani, 2011) | NO  | NO | NO | 150 |
| Hahm, 2010                                           | NO  | NO | NO | 84  |
| Huh, 2010                                            | NO  | NO | NO | 60  |
| Jee, 2010                                            | NO  | NO | NO | 100 |
| Jokela, 2010                                         | NO  | NO | NO | 80  |
| Mishra, 2010                                         | NO  | NO | NO | 40  |
| Omar, 2010                                           | NO  | NO | NO | 40  |
| Rauers, 2010                                         | NO  | NO | NO | 179 |
| Ryu, 2010                                            | NO  | NO | NO | 120 |
| Shakya, 2010                                         | NO  | NO | NO | 80  |
| Singla, 2010                                         | NO  | NO | NO | 702 |
| Tan, 2010                                            | YES | NO | NO | 80  |
| Yun, 2010                                            | NO  | NO | NO | 98  |
| Farouk, 2009                                         | NO  | NO | NO | 30  |
| Feng, 2009                                           | NO  | NO | NO | 192 |
| Gan, 2009                                            | NO  | NO | NO | 138 |
| Gandhi, 2009                                         | NO  | NO | NO | 150 |
| Grover, 2009                                         | YES | NO | NO | 103 |
| Jain, 2009                                           | NO  | NO | NO | 87  |
| Jellish, 2009                                        | NO  | NO | NO | 100 |
| Kim, 2009                                            | YES | NO | NO | 162 |
| Riad, 2009                                           | NO  | NO | NO | 100 |
| Rosow, 2009                                          | NO  | NO | NO | 244 |
| Aghadavoudi, 2008                                    | YES | NO | NO | 120 |
| Bano, 2008                                           | NO  | NO | NO | 97  |
| Bhatia, 2008                                         | NO  | NO | NO | 120 |
| Candiotti, 2008                                      | NO  | NO | NO | 546 |
| Choi, 2008                                           | NO  | NO | NO | 94  |
| Contreras-Dominguez, 2008                            | YES | NO | NO | 150 |
| Cruz, 2008                                           | NO  | NO | NO | 372 |
| Davis, 2008                                          | NO  | NO | NO | 200 |
| Erhan, 2008                                          | YES | NO | NO | 80  |
| Gautam, 2008                                         | NO  | NO | NO | 142 |
| Gupta, 2008                                          | NO  | NO | NO | 60  |
| Kaki, 2008                                           | YES | NO | NO | 75  |
| Kovac, 2008                                          | NO  | NO | NO | 544 |
| Krobbuaban, 2008                                     | NO  | NO | NO | 380 |
| Lee, 2008                                            | NO  | NO | NO | 236 |
| Ng, 2008                                             | NO  | NO | NO | 81  |
| Olatosi, 2008                                        | NO  | NO | NO | 75  |
| Pan, 2008                                            | NO  | NO | NO | 60  |
| Piper, 2008                                          | YES | NO | NO | 83  |
| Said-Ahmed, 2008                                     | NO  | NO | NO | 50  |
| Sajedi, 2008                                         | NO  | NO | NO | 66  |
| Sakellaris, 2008                                     | NO  | NO | NO | 110 |

|                         |     |    |    |     |
|-------------------------|-----|----|----|-----|
| Schnaider, 2008         | NO  | NO | NO | 70  |
| Aouad, 2007             | NO  | NO | NO | 89  |
| Balki, 2007             | NO  | NO | NO | 176 |
| Bestas, 2007            | YES | NO | NO | 90  |
| Bhatagnar, 2007         | NO  | NO | NO | 90  |
| Bolton, 2007            | NO  | NO | NO | 557 |
| Boonmak, 2007           | NO  | NO | NO | 160 |
| Candiotti, 2007         | NO  | NO | NO | 88  |
| Diemunsch, 2007         | NO  | NO | NO | 892 |
| Gan, 2007               | NO  | NO | NO | 766 |
| Gombar, 2007            | NO  | NO | NO | 90  |
| Gulhas, 2007            | NO  | NO | NO | 72  |
| Han, 2007               | NO  | NO | NO | 80  |
| Harnett, 2007           | NO  | NO | NO | 240 |
| Kushwaha, 2007          | NO  | NO | NO | 125 |
| Lee, 2007               | NO  | NO | NO | 86  |
| Moussa, 2007            | YES | NO | NO | 120 |
| Oksuz, 2007             | NO  | NO | NO | 75  |
| Paech, 2007             | NO  | NO | NO | 614 |
| Rusch, 2007             | NO  | NO | NO | 228 |
| Sagir, 2007             | NO  | NO | NO | 80  |
| Sandhu, 2007            | NO  | NO | NO | 80  |
| Sarkar, 2007            | NO  | NO | NO | 60  |
| Sharma, 2007            | NO  | NO | NO | 40  |
| Siddik-Sayyid, 2007     | NO  | NO | NO | 129 |
| Sodhi, 2007             | NO  | NO | NO | 90  |
| Sriraman, 2007          | NO  | NO | NO | 100 |
| Subramaniam, 2007       | NO  | NO | NO | 75  |
| Teran, 2007             | NO  | NO | NO | 35  |
| White, 2007             | NO  | NO | NO | 66  |
| Wig, 2007               | NO  | NO | NO | 70  |
| Akin, 2006              | YES | NO | NO | 70  |
| Birmingham, 2006        | NO  | NO | NO | 100 |
| Bridge, 2006            | NO  | NO | NO | 194 |
| Chan, 2006              | NO  | NO | NO | 394 |
| Eberhart, 2006          | YES | NO | NO | 310 |
| Gunter, 2006            | NO  | NO | NO | 240 |
| Gupta, 2006             | NO  | NO | NO | 200 |
| Isik, 2006              | NO  | NO | NO | 60  |
| Janicki, 2006           | NO  | NO | NO | 150 |
| Jellish, 2006           | NO  | NO | NO | 120 |
| Johns, 2006             | NO  | NO | NO | 960 |
| Khan, 2006              | NO  | NO | NO | 180 |
| Kolm, 2006              | NO  | NO | NO | 100 |
| Leksowski, 2006         | NO  | NO | NO | 210 |
| Paranhos de Abreu, 2006 | NO  | NO | NO | 100 |
| Peixoto, 2006           | YES | NO | NO | 120 |
| Purhonen, 2006a         | YES | NO | NO | 56  |

|                                |     |     |     |     |
|--------------------------------|-----|-----|-----|-----|
| Purhonen, 2000b                | NO  | NO  | NO  | 100 |
| Sarvela, 2006                  | NO  | NO  | NO  | 87  |
| Tosun, 2006                    | NO  | YES | NO  | 125 |
| Tseng, 2006                    | NO  | NO  | NO  | 140 |
| Veneziani, 2006                | NO  | NO  | NO  | 100 |
| White, 2006                    | NO  | NO  | NO  | 205 |
| Cohen, 2005                    | NO  | NO  | NO  | 62  |
| D'Angelo, 2005                 | YES | NO  | NO  | 121 |
| Demiraran, 2005                | NO  | NO  | NO  | 90  |
| Gan, 2005                      | NO  | NO  | NO  | 176 |
| Hartsell, 2005                 | NO  | NO  | NO  | 60  |
| Iatrou, 2005                   | NO  | NO  | NO  | 105 |
| Kabalak, 2005                  | NO  | NO  | NO  | 60  |
| Khan, 2005                     | NO  | NO  | NO  | 60  |
| Kocamanoglu, 2005              | YES | NO  | NO  | 150 |
| Kontrimaviciute, 2005          | NO  | NO  | NO  | 34  |
| Misra, 2005                    | YES | NO  | NO  | 79  |
| Pirat, 2005                    | YES | NO  | NO  | 150 |
| Treschan, 2005                 | NO  | NO  | NO  | 142 |
| White, 2005 <sup>7</sup>       | NO  | NO  | NO  | 372 |
| Alkaissi, 2004                 | NO  | NO  | NO  | 495 |
| Apfel, 2004 (CR: Jokela, 2009) | NO  | YES | YES | 260 |
| Barbone, 2004                  | NO  | NO  | NO  | 141 |
| Barbosa, 2004                  | NO  | NO  | NO  | 60  |
| Bhardwaj, 2004                 | NO  | NO  | NO  | 100 |
| Binstock, 2004                 | NO  | NO  | NO  | 101 |
| Browning, 2004                 | NO  | NO  | NO  | 212 |
| Celiker, 2004                  | NO  | NO  | NO  | 102 |
| Dua, 2004                      | YES | NO  | NO  | 60  |
| Eberhart, 2004                 | NO  | NO  | NO  | 304 |
| Gan, 2004                      | YES | NO  | NO  | 49  |
| Han, 2004                      | NO  | NO  | NO  | 350 |
| Hanaoka, 2004                  | YES | NO  | NO  | 315 |
| Meyer, 2004                    | NO  | NO  | NO  | 92  |
| Panda, 2004                    | NO  | NO  | NO  | 100 |
| Samakarndi, 2004               | NO  | NO  | NO  | 80  |
| Sinha, 2004                    | YES | NO  | NO  | 70  |
| Bharti, 2003                   | NO  | YES | NO  | 120 |
| Biswas, 2003a                  | YES | NO  | NO  | 160 |
| Biswas, 2003b                  | NO  | YES | NO  | 120 |
| Burmeister, 2003               | NO  | YES | NO  | 40  |
| Charuluxananan, 2003           | NO  | YES | NO  | 180 |
| Karamanlioglu, 2003            | NO  | YES | NO  | 150 |
| Loewen, 2003                   | NO  | YES | NO  | 71  |
| Maddali, 2003                  | NO  | NO  | NO  | 120 |
| Madenoglu, 2003                | YES | YES | NO  | 60  |
| O'Brien, 2003                  | NO  | YES | NO  | 150 |
| Olutoye, 2003                  | NO  | YES | NO  | 204 |

|                          |     |     |    |     |
|--------------------------|-----|-----|----|-----|
| Oztekin, 2003            | NO  | YES | NO | 40  |
| Paech, 2003              | NO  | YES | NO | 118 |
| Pan, 2003                | NO  | NO  | NO | 40  |
| Samra, 2003 <sup>†</sup> | NO  | NO  | NO | 250 |
| Szarvas, 2003            | NO  | YES | NO | 130 |
| Tang, 2003               | NO  | YES | NO | 135 |
| Thagaard, 2003           | NO  | YES | NO | 96  |
| Tzeng, 2003              | YES | YES | NO | 65  |
| Usmani, 2003             | NO  | YES | NO | 90  |
| Wagner, 2003             | NO  | YES | NO | 94  |
| Wattwil, 2003            | NO  | YES | NO | 78  |
| Yukseki, 2003            | YES | NO  | NO | 60  |
| Adducci, 2002            | NO  | YES | NO | 180 |
| Agarwal, 2002            | NO  | YES | NO | 100 |
| Arcioni, 2002            | NO  | YES | NO | 59  |
| Argiriadou, 2002         | NO  | YES | NO | 87  |
| Coloma, 2002             | NO  | NO  | NO | 60  |
| Coloma, 2002             | NO  | YES | NO | 140 |
| Elhakim, 2002            | NO  | YES | NO | 180 |
| Fabling, 2002            | YES | YES | NO | 46  |
| Gan, 2002                | NO  | YES | NO | 60  |
| Goksu, 2002              | NO  | YES | NO | 60  |
| Grimsehl, 2002           | NO  | YES | NO | 74  |
| Jokela, 2002             | YES | YES | NO | 179 |
| Lee, 2002                | YES | YES | NO | 113 |
| Marcus, 2002             | NO  | YES | NO | 120 |
| Mullick, 2002            | NO  | NO  | NO | 75  |
| Munro, 2002              | NO  | YES | NO | 53  |
| Ozmen, 2002              | NO  | YES | NO | 60  |
| Paech, 2002              | NO  | YES | NO | 139 |
| Quaynor, 2002            | NO  | YES | NO | 107 |
| Sanchez-Ledesma, 2002    | NO  | YES | NO | 90  |
| Sennaraj, 2002           | NO  | YES | NO | 150 |
| So, 2002                 | NO  | YES | NO | 68  |
| Sukhani, 2002            | NO  | YES | NO | 149 |
| Wang, 2002a              | YES | YES | NO | 115 |
| Wang, 2002b              | YES | YES | NO | 116 |
| Wang, 2002               | YES | YES | NO | 114 |
| White, 2002              | NO  | NO  | NO | 120 |
| Yazigi, 2002             | NO  | YES | NO | 100 |
| Bowhay, 2001             | NO  | YES | NO | 131 |
| Cherian, 2001            | NO  | YES | NO | 81  |
| Dabbous, 2001            | NO  | NO  | NO | 173 |
| De Witte, 2001           | NO  | NO  | NO | 40  |
| Ganem, 2001              | NO  | YES | NO | 52  |
| Goll, 2001               | NO  | YES | NO | 240 |
| Kathirvel, 2001          | YES | YES | NO | 152 |
| Millo, 2001              | NO  | YES | NO | 137 |

|                      |     |     |     |      |
|----------------------|-----|-----|-----|------|
| Pan, 2001            | YES | YES | NO  | 156  |
| Paventi, 2001        | NO  | YES | NO  | 60   |
| Shende, 2001         | NO  | YES | NO  | 240  |
| Somri, 2001          | NO  | YES | NO  | 60   |
| Splinter, 2001       | NO  | YES | NO  | 193  |
| Subramaniam, 2001    | NO  | YES | NO  | 135  |
| Thomas, 2001         | NO  | YES | NO  | 177  |
| White, 2001          | NO  | YES | NO  | 80   |
| Wilson, 2001         | NO  | YES | NO  | 232  |
| Yilmazlar, 2001      | NO  | YES | NO  | 60   |
| Ahmed, 2000          | NO  | YES | NO  | 139  |
| Charuluxananan, 2000 | NO  | NO  | NO  | 80   |
| Fabling, 2000        | YES | YES | NO  | 60   |
| Gesztesi, 2000       | NO  | YES | NO  | 157  |
| Holt, 2000           | NO  | YES | NO  | 125  |
| Jensen, 2000         | NO  | YES | NO  | 71   |
| Jokela, 2000         | NO  | YES | NO  | 120  |
| Kothari, 2000        | NO  | YES | NO  | 108  |
| Kreisler, 2000       | NO  | YES | NO  | 31   |
| Ku, 2000             | YES | YES | NO  | 58   |
| Lee, 2000            | YES | NO  | NO  | 120  |
| Lieberman, 2000      | NO  | YES | YES | 84   |
| Najeeb, 2000         | NO  | YES | NO  | 45   |
| Peixoto, 2000        | NO  | YES | NO  | 90   |
| Philip, 2000         | YES | YES | NO  | 1030 |
| Reihner, 2000        | YES | YES | NO  | 207  |
| Sadhasivam, 2000     | NO  | YES | NO  | 180  |
| Scuderi, 2000        | NO  | YES | NO  | 139  |
| Sharma, 2000         | NO  | YES | NO  | 98   |
| Wu, 2000             | YES | YES | NO  | 152  |
| Zarate, 2000         | NO  | YES | NO  | 200  |
| Abouleish, 1999      | NO  | NO  | NO  | 74   |
| Allen, 1999          | NO  | YES | NO  | 56   |
| Barst, 1999          | NO  | YES | NO  | 90   |
| Broome, 1999         | NO  | NO  | NO  | 109  |
| Bugedo, 1999         | NO  | YES | NO  | 242  |
| Cholwill, 1999       | NO  | YES | NO  | 175  |
| de Adana, 1999       | NO  | YES | NO  | 52   |
| Gurler, 1999         | NO  | YES | NO  | 40   |
| Helmy, 1999          | YES | YES | YES | 160  |
| Janknegt, 1999       | NO  | YES | NO  | 397  |
| Jokela, 1999         | NO  | YES | NO  | 120  |
| Kathirvel, 1999      | NO  | YES | NO  | 100  |
| Khalil, 1999         | NO  | YES | NO  | 63   |
| Koivuranta, 1999     | NO  | YES | NO  | 88   |
| Kovac, 1999          | NO  | NO  | NO  | 428  |
| Kyokong, 1999        | NO  | YES | NO  | 400  |
| McCall, 1999         | NO  | YES | NO  | 100  |

|                         |     |     |    |      |
|-------------------------|-----|-----|----|------|
| Munro, 1999             | NO  | YES | NO | 73   |
| Rajeeva, 1999           | NO  | YES | NO | 51   |
| Sadhasivam, 1999        | YES | YES | NO | 54   |
| Sandhu, 1999            | NO  | NO  | NO | 87   |
| Scuderi, 1999a          | NO  | YES | NO | 575  |
| Scuderi, 1999b          | NO  | YES | NO | NR   |
| Sinha, 1999             | YES | YES | NO | 40   |
| Swiatkowski, 1999       | NO  | YES | NO | 134  |
| Tsui, 1999              | NO  | YES | NO | 121  |
| Turhanoglu, 1999        | NO  | YES | NO | 100  |
| Wagley, 1999            | NO  | YES | NO | 50   |
| Woodward, 1999          | NO  | YES | NO | 216  |
| Alon, 1998              | NO  | NO  | NO | 314  |
| Ang, 1998               | NO  | NO  | NO | 47   |
| Bacic, 1998             | NO  | YES | NO | 50   |
| Chan, 1998              | YES | YES | NO | 148  |
| Chen, 1998a             | NO  | YES | NO | 78   |
| Chen, 1998b             | NO  | NO  | NO | 80   |
| Dabbous, 1998           | NO  | YES | NO | 85   |
| Daftary, 1998           | NO  | YES | NO | 150  |
| Dershwitz, 1998         | NO  | YES | NO | 175  |
| Diemunsch, 1998         | YES | YES | NO | 793  |
| Doe, 1998               | NO  | YES | NO | 45   |
| Dresner, 1998           | NO  | YES | NO | 60   |
| Goodarzi, 1998          | NO  | YES | NO | 81   |
| Hamid, 1998             | NO  | YES | NO | 71   |
| Jellish, 1998           | NO  | NO  | NO | 120  |
| Mitra, 1998             | NO  | NO  | NO | 80   |
| Morris, 1998            | NO  | YES | NO | 1044 |
| Scholz, 1998            | YES | YES | NO | 842  |
| Splinter, 1998a         | NO  | YES | NO | 197  |
| Splinter, 1998b         | NO  | YES | NO | 216  |
| Tang, 1998a             | NO  | YES | NO | 218  |
| Tang, 1998b             | NO  | YES | NO | 156  |
| Tramer, 1998            | NO  | YES | NO | 157  |
| Akcabay, 1997           | NO  | NO  | NO | 60   |
| Alexander, 1997         | NO  | YES | NO | 124  |
| Ascaso, 1997            | NO  | YES | NO | 251  |
| Bach-Styles, 1997       | NO  | YES | NO | 101  |
| Carnahan, 1997          | NO  | YES | NO | 54   |
| Diemunsch, 1997a        | NO  | NO  | NO | 746  |
| Diemunsch, 1997b        | NO  | YES | NO | 281  |
| Diemunsch, 1997c        | NO  | NO  | NO | 337  |
| Graczyk, 1997           | NO  | NO  | NO | 635  |
| Klockgether-Radke, 1997 | NO  | YES | NO | 120  |
| Koivuranta, 1997        | NO  | YES | NO | 439  |
| Korttila, 1997          | YES | YES | NO | 517  |
| Kovac, 1997             | NO  | NO  | NO | 620  |



|                                     |     |     |     |     |
|-------------------------------------|-----|-----|-----|-----|
| Lawhorn, 1997                       | NO  | YES | NO  | 320 |
| Maestre, 1997                       | YES | NO  | NO  | 233 |
| McKenzie, 1997                      | NO  | YES | NO  | 80  |
| Mikawa, 1997                        | YES | YES | NO  | 200 |
| Moens, 1997                         | YES | YES | NO  | 206 |
| Monagle, 1997                       | NO  | YES | NO  | 91  |
| Morton, 1997                        | NO  | YES | NO  | 427 |
| Patel, 1997                         | NO  | NO  | NO  | 429 |
| Pitkanen, 1997                      | NO  | YES | NO  | 73  |
| Polati, 1997                        | NO  | NO  | NO  | 175 |
| Purhonen, 1997                      | YES | YES | NO  | 146 |
| Rung, 1997                          | NO  | NO  | NO  | 121 |
| Scuderi, 1997                       | NO  | YES | NO  | 160 |
| Shende, 1997                        | NO  | YES | NO  | 176 |
| Sniadach, 1997                      | NO  | YES | NO  | 158 |
| Splinter, 1997                      | NO  | YES | NO  | 239 |
| Stienstra, 1997                     | NO  | NO  | NO  | 74  |
| Sun, 1997                           | NO  | YES | YES | 75  |
| Taylor, 1997                        | NO  | NO  | NO  | 523 |
| Ulusoy, 1997                        | NO  | NO  | NO  | 40  |
| Warriner, 1997                      | YES | YES | NO  | 374 |
| Ali-melkkila, 1996                  | NO  | NO  | NO  | 120 |
| Alon, 1996                          | NO  | YES | NO  | 80  |
| Capouet, 1996                       | YES | YES | NO  | 385 |
| Chen, 1996                          | NO  | YES | NO  | 49  |
| Cieslak, 1996                       | NO  | YES | NO  | 97  |
| Davies, 1996                        | NO  | YES | NO  | 66  |
| Ercelen, 1996                       | NO  | YES | NO  | 100 |
| Eriksson, 1996                      | YES | YES | NO  | 58  |
| Furst, 1996                         | NO  | YES | NO  | 60  |
| Gaynes, 1996 <sup>†</sup>           | NO  | NO  | NO  | 87  |
| Honkavaara, 1996                    | YES | YES | NO  | 49  |
| Kaul, 1996                          | YES | YES | NO  | 241 |
| Khalil, 1996                        | NO  | NO  | NO  | 375 |
| Kimya, 1996                         | NO  | YES | NO  | 140 |
| Koivuranta, 1996                    | NO  | YES | NO  | 63  |
| Kovac, 1996 (CR: Pearman,<br>1994c) | YES | YES | NO  | 468 |
| Kumar, 1996                         | NO  | YES | NO  | 30  |
| Lawhorn, 1996                       | NO  | YES | NO  | 165 |
| Lekprasert, 1996                    | NO  | YES | NO  | 82  |
| Lopez-Orlaondo, 1996                | YES | YES | NO  | 100 |
| Naguib, 1996                        | YES | YES | NO  | 132 |
| Pan, 1996                           | NO  | NO  | NO  | 48  |
| Principi, 1996                      | NO  | YES | NO  | 60  |
| Pueyo, 1996                         | YES | YES | NO  | 100 |
| Pugh, 1996                          | NO  | YES | NO  | 60  |
| Rodrigo, 1996                       | NO  | YES | NO  | 32  |

|                                          |     |     |    |     |
|------------------------------------------|-----|-----|----|-----|
| Rose, 1996a                              | NO  | YES | NO | 136 |
| Rose, 1996b                              | NO  | YES | NO | 200 |
| Stene, 1996                              | NO  | YES | NO | 120 |
| Tang, 1996                               | NO  | YES | NO | 161 |
| Usha, 1996                               | NO  | YES | NO | 92  |
| Van Den Berg, 1996a                      | YES | YES | NO | 220 |
| Van Den Berg, 1996b                      | NO  | YES | NO | 282 |
| Van Den Berg, 1996c                      | YES | YES | NO | 148 |
| Watts, 1996                              | NO  | YES | NO | 167 |
| Wilson, 1996                             | YES | YES | NO | 527 |
| Wrench, 1996                             | NO  | YES | NO | 60  |
| Yilmazlar, 1996                          | NO  | YES | NO | 60  |
| Alexander, 1995                          | NO  | YES | NO | 127 |
| Campbell, 1995                           | NO  | YES | NO | 32  |
| Davis, 1995a                             | NO  | YES | NO | 213 |
| Davis, 1995b                             | NO  | YES | NO | 95  |
| Desilva, 1995                            | NO  | NO  | NO | 286 |
| Elhakim, 1995                            | NO  | YES | NO | 50  |
| Grond, 1995                              | NO  | YES | NO | 80  |
| Litman, 1995                             | NO  | YES | NO | 57  |
| Mikawa, 1995                             | YES | YES | NO | 120 |
| Paech, 1995                              | NO  | YES | NO | 259 |
| Paxton, 1995a                            | NO  | YES | NO | 60  |
| Paxton, 1995b                            | NO  | YES | NO | 118 |
| Splinter, 1995a                          | NO  | YES | NO | 233 |
| Splinter, 1995b                          | NO  | YES | NO | 276 |
| Watcha, 1995                             | NO  | YES | NO | 130 |
| Furst, 1994                              | NO  | YES | NO | 239 |
| Gan, 1994                                | YES | YES | NO | 120 |
| Kaufmann, 1994                           | YES | YES | NO | 286 |
| Khalil, 1994 (CR: Pearman,<br>1994b)     | NO  | NO  | NO | 589 |
| Litman, 1994                             | NO  | YES | NO | 60  |
| Malins, 1994                             | NO  | YES | NO | 150 |
| McKenzie, 1994                           | NO  | YES | NO | 180 |
| Rodrigo, 1994                            | NO  | YES | NO | 77  |
| Rose, 1994                               | NO  | YES | NO | 100 |
| Suen, 1994                               | NO  | YES | NO | 204 |
| Ummenhofer, 1994                         | NO  | YES | NO | 200 |
| Volpe, 1994                              | NO  | YES | NO | 928 |
| Dupeyron, 1993                           | NO  | YES | NO | 243 |
| Helmets, 1993                            | NO  | YES | NO | 923 |
| McKenzie, 1993b (CR:<br>Dershwitz, 1992) | NO  | YES | NO | 137 |
| Raphael, 1993                            | NO  | YES | NO | 123 |
| Sung, 1993                               | NO  | YES | NO | 180 |
| Zomers, 1993                             | NO  | YES | NO | 69  |
| Alon, 1992                               | NO  | YES | NO | 66  |

|                                                                                                                                                 |    |     |    |      |
|-------------------------------------------------------------------------------------------------------------------------------------------------|----|-----|----|------|
| Du Pen, 1992 (CR: Scuderi, 1993)                                                                                                                | NO | NO  | NO | 500  |
| Kenny, 1992                                                                                                                                     | NO | NO  | NO | 982  |
| Kovac, 1992 (CRs: McKenzie, 1993a; Pearman, 1994a)                                                                                              | NO | NO  | NO | 580  |
| Bodner, 1991                                                                                                                                    | NO | NO  | NO | 71   |
| Larijani, 1991                                                                                                                                  | NO | NO  | NO | 36   |
| Leeser, 1991                                                                                                                                    | NO | YES | NO | 84   |
| <i>Non randomized clinical trials (n=5)</i>                                                                                                     |    |     |    |      |
| Stamer, 2011                                                                                                                                    | NO | NO  | NO | 141  |
| Rabbani, 2010                                                                                                                                   | NO | NO  | NO | 60   |
| Kim, 2007                                                                                                                                       | NO | NO  | NO | 2839 |
| Biedler, 2004                                                                                                                                   | NO | NO  | NO | 159  |
| Manani, 1996                                                                                                                                    | NO | YES | NO | 200  |
| <i>Controlled before-after study (n=1)</i>                                                                                                      |    |     |    |      |
| Wagner, 2007                                                                                                                                    | NO | NO  | NO | 66   |
| <i>Cohort studies (n=9)</i>                                                                                                                     |    |     |    |      |
| Shakeel, 2012                                                                                                                                   | NO | NO  | NO | 432  |
| Chen, 2011                                                                                                                                      | NO | NO  | NO | 90   |
| Eryilmaz, 2008                                                                                                                                  | NO | NO  | NO | 212  |
| Habib, 2007                                                                                                                                     | NO | NO  | NO | 3814 |
| Flynn, 2006                                                                                                                                     | NO | NO  | NO | 849  |
| Wang, 2005                                                                                                                                      | NO | NO  | NO | 38   |
| Piwko, 2005                                                                                                                                     | NO | NO  | NO | 282  |
| Walker, 2001                                                                                                                                    | NO | NO  | NO | 59   |
| O'Brien, 2000                                                                                                                                   | NO | NO  | NO | 200  |
| <b>Total included studies</b>                                                                                                                   | 66 | 217 | 4  |      |
| <b>Note:</b> †Unpublished data (Gurha, 2012; Apfel, 2011; White, 2005; Samra, 2003; Gaynes, 1996).                                              |    |     |    |      |
| <b>Abbreviations:</b> CR, companion report; NMA, network meta-analysis; NO, study wasn't included in review; YES, study was included in review. |    |     |    |      |
